# Supplementary material for: Unbiased machine learning-assisted approach for conditional discretization of human performances
Source: PeerJ Comput Sci. 2025 Apr 21;11:e2804. doi: 10.7717/peerj-cs.2804 (PMC12190627; doi:10.7717/peerj-cs.2804)
Supplement: Supplemental Information 1 [file peerj-cs-11-2804-s001.xlsx]

## Sheet: Employees Evaluation for Promot
employee_id	department	region	education	gender	recruitment_channel	no_of_trainings	age	previous_year_rating	length_of_service	awards_won	avg_training_score	is_promoted
65438	Sales & Marketing	region_7	Master's & above	f	sourcing	1	35	5	8	0	49	0
65141	Operations	region_22	Bachelor's	m	other	1	30	5	4	0	60	0
7513	Sales & Marketing	region_19	Bachelor's	m	sourcing	1	34	3	7	0	50	0
48945	Technology	region_26	Bachelor's	m	other	1	45	3	2	0	73	0
20379	Operations	region_20	Bachelor's	f	other	1	31	3	5	0	59	0
16290	Operations	region_34	Master's & above	m	sourcing	1	33	3	6	0	63	0
73202	Analytics	region_20	Bachelor's	m	other	1	28	4	5	0	83	0
28911	Sales & Marketing	region_1	Master's & above	m	sourcing	1	32	5	5	0	54	0
29934	Technology	region_23		m	sourcing	1	30		1	0	77	0
49017	Sales & Marketing	region_7	Bachelor's	f	sourcing	1	35	5	3	0	50	1
60051	Sales & Marketing	region_4	Bachelor's	m	sourcing	1	49	5	5	0	49	0
77040	R&D	region_2	Master's & above	m	sourcing	1	37	3	7	0	84	0
43931	Operations	region_7	Bachelor's	m	other	1	37	1	10	0	60	0
7152	Technology	region_2	Bachelor's	m	other	1	38	3	5	0	77	0
9403	Sales & Marketing	region_31	Bachelor's	m	other	1	34	1	4	0	51	0
17436	Sales & Marketing	region_31	Bachelor's	m	other	1	34	5	8	0	46	0
54461	Operations	region_15	Bachelor's	m	other	1	37	3	9	0	59	0
12067	Procurement	region_14	Bachelor's	m	other	1	35	3	7	0	75	0
33332	Operations	region_15		m	sourcing	1	41	4	11	0	57	0
58789	Finance	region_11	Bachelor's	f	other	1	28	3	4	0	63	0
71177	Procurement	region_5	Bachelor's	m	other	1	27		1	0	70	0
26585	Technology	region_22	Bachelor's	m	other	1	27	5	3	0	83	0
37749	Procurement	region_26	Bachelor's	m	other	1	31	5	4	0	68	0
2370	Technology	region_26	Bachelor's	m	other	1	33	4	4	0	79	0
8219	Analytics	region_5	Bachelor's	m	other	1	29	5	3	0	80	0
74759	Sales & Marketing	region_4	Bachelor's	m	sourcing	1	26		1	0	44	0
27395	Procurement	region_15	Bachelor's	m	sourcing	1	37	5	10	0	72	0
35465	Sales & Marketing	region_7		f	sourcing	1	24	1	2	0	48	0
77064	Sales & Marketing	region_22	Bachelor's	m	other	1	40	2	4	0	47	0
64062	Technology	region_28	Bachelor's	m	sourcing	1	33	4	4	0	75	0
47123	Sales & Marketing	region_7	Bachelor's	f	sourcing	1	40	5	3	0	47	0
56275	Sales & Marketing	region_1	Master's & above	m	other	1	42	5	5	0	51	0
58304	Sales & Marketing	region_28	Bachelor's	m	sourcing	1	33	5	6	0	51	1
25014	Technology	region_15	Bachelor's	m	other	1	34	3	10	0	80	0
23560	HR	region_2	Bachelor's	m	sourcing	1	59	4	26	0	52	0
61758	Analytics	region_2	Bachelor's	m	other	1	44	5	12	0	88	0
75009	Procurement	region_17	Bachelor's	f	sourcing	1	50	5	11	0	71	0
17876	Procurement	region_13	Master's & above	f	other	1	37	4	4	0	71	0
36924	Technology	region_16	Bachelor's	m	sourcing	1	40	3	11	0	80	0
50408	Sales & Marketing	region_20	Bachelor's	m	sourcing	1	30	3	3	0	49	0
18013	Procurement	region_2	Master's & above	f	sourcing	1	56	3	12	0	73	0
24104	Finance	region_2	Bachelor's	m	sourcing	1	20	4	2	0	60	0
32083	Sales & Marketing	region_25	Bachelor's	f	sourcing	1	31	3	8	0	48	0
38330	Procurement	region_15	Bachelor's	m	sourcing	1	40	3	12	0	65	0
33690	HR	region_22	Bachelor's	m	other	1	30	1	6	0	50	0
73161	Operations	region_22	Bachelor's	m	other	1	39	3	5	0	62	0
45709	Sales & Marketing	region_31	Bachelor's	f	other	1	29		1	0	49	0
32709	R&D	region_22	Master's & above	m	sourcing	1	40	3	5	0	84	0
32656	Sales & Marketing	region_19	Bachelor's	m	other	1	40	4	7	0	52	0
17673	Sales & Marketing	region_4	Master's & above	m	other	1	50	4	17	0	47	1
3113	Sales & Marketing	region_29	Bachelor's	m	sourcing	1	25	3	3	0	53	0
9150	Analytics	region_22	Bachelor's	f	other	1	28		1	0	80	0
14107	Sales & Marketing	region_1	Master's & above	m	sourcing	1	35	4	2	0	52	0
58747	R&D	region_26	Bachelor's	m	other	1	34	5	5	0	87	0
3342	Operations	region_13	Master's & above	f	sourcing	1	31	3	3	0	58	0
77981	Finance	region_22	Bachelor's	m	other	1	27		1	1	58	1
16502	Sales & Marketing	region_22	Bachelor's	m	sourcing	1	27		1	0		1
73729	Procurement	region_10	Bachelor's	m	other	1	30	4	6	0	75	0
45624	Analytics	region_31	Bachelor's	m	other	1	30	3	7	0	84	1
75677	Operations	region_22	Bachelor's	f	other	1	50	5	5	0	59	0
24040	Technology	region_22	Master's & above	m	other	1	34	5	7	0	78	1
68082	Sales & Marketing	region_2	Master's & above	f	sourcing	1	41	1	12	0	52	0
51786	Sales & Marketing	region_16	Bachelor's	m	sourcing	1	32	4	6	0	44	0
77577	Sales & Marketing	region_7	Bachelor's	m	other	1	50	3	14	0	52	0
54782	Sales & Marketing	region_2	Master's & above	m	sourcing	1	38	4	2	0	49	1
75103	Sales & Marketing	region_30	Bachelor's	m	sourcing	1	35	4	3	0	53	0
7520	Analytics	region_2	Bachelor's	m	other	1	25	3	2	0	91	0
59147	Sales & Marketing	region_22	Bachelor's	m	sourcing	1	30	3	3	0	58	1
53092	Technology	region_2	Bachelor's	m	referred	1	47	3	7	0	79	0
34564	Operations	region_4	Master's & above	m	sourcing	1	35	2	7	0	53	0
77135	R&D	region_22	Bachelor's	m	other	1	36	4	8	0	82	0
44575	Legal	region_7	Bachelor's	m	other	1	29		1	0	65	1
47498	Operations	region_11	Master's & above	f	sourcing	1	42	5	11	0	60	1
20798	HR	region_20	Bachelor's	f	sourcing	1	28	2	6	0	52	0
69094	Sales & Marketing	region_2		m	sourcing	1	39	1	9	0	49	0
22261	Procurement	region_7	Master's & above	m	sourcing	1	32	5	3	0	69	1
9589	Sales & Marketing	region_31	Bachelor's	f	other	1	31		1	0	51	0
62658	Sales & Marketing	region_2		f	sourcing	1	20		1	0	55	0
21628	Analytics	region_12	Bachelor's	m	other	1	34	3	8	0	85	0
44523	HR	region_2	Master's & above	m	other	1	47	3	7	0	44	0
35420	Operations	region_2	Bachelor's	f	other	1	44	4	13	0	53	0
43923	Analytics	region_14	Bachelor's	m	sourcing	1	31	4	4	0	86	0
64109	Technology	region_26	Bachelor's	f	sourcing	1	23		1	0	77	0
41983	Operations	region_2	Bachelor's	f	sourcing	1	33	3	5	0	57	0
21440	Sales & Marketing	region_31	Bachelor's	m	other	1	41	3	12	0	52	0
51256	Finance	region_2	Master's & above	m	other	1	60	5	17	0	59	0
66635	Operations	region_15	Bachelor's	m	other	1	31	5	4	0	63	1
16027	Operations	region_26	Bachelor's	f	other	1	37	3	11	0	57	0
28509	Sales & Marketing	region_7	Bachelor's	m	other	1	40	5	8	0	54	0
33587	Sales & Marketing	region_28	Master's & above	m	sourcing	1	42	5	4	0	50	0
21387	Operations	region_13	Bachelor's	m	other	1	35	4	6	0	57	1
55927	Operations	region_13	Master's & above	f	sourcing	1	41	4	6	0	62	0
60763	Procurement	region_2	Bachelor's	f	other	1	23	3	2	0	73	0
32672	Analytics	region_22	Master's & above	m	other	1	42	2	19	0	79	0
51444	HR	region_13	Bachelor's	f	other	1	30		1	0	54	0
75778	Operations	region_2	Bachelor's	m	sourcing	1	41	4	6	0	63	0
14141	Sales & Marketing	region_7	Bachelor's	f	other	1	40	3	2	0	90	1
17894	Sales & Marketing	region_2	Bachelor's	m	referred	1	34	5	5	0	49	0
54380	Sales & Marketing	region_4	Bachelor's	f	other	1	31	4	2	0	46	0
51892	Technology	region_2	Bachelor's	m	other	1	27	5	2	0	86	1
38771	Procurement	region_23	Bachelor's	f	other	1	27	4	4	0	72	1
21137	Technology	region_2	Bachelor's	m	sourcing	1	35	4	6	0	77	0
26097	Sales & Marketing	region_25	Master's & above	m	other	1	34	5	7	0	51	1
38052	Procurement	region_34	Master's & above	m	sourcing	1	37	5	3	1	92	1
41746	Operations	region_22	Bachelor's	f	sourcing	1	27		1	0	58	0
5461	Analytics	region_8	Bachelor's	m	other	1	28		1	0	83	0
15227	Procurement	region_27	Master's & above	f	other	1	40	5	5	0	68	0
66874	Sales & Marketing	region_27	Bachelor's	f	other	1	30		1	0	50	0
42068	Operations	region_1	Master's & above	m	other	1	38	5	9	0		0
54825	Sales & Marketing	region_25	Bachelor's	m	other	1	30	3	2	0	47	0
77709	Sales & Marketing	region_11	Bachelor's	f	sourcing	1	28	5	3	0	46	0
74783	Operations	region_29	Bachelor's	m	sourcing	1	35	4	7	0	58	0
19318	Analytics	region_22	Bachelor's	m	other	1	32	3	8	0	89	1
12096	Sales & Marketing	region_26	Master's & above	m	sourcing	1	36	5	8	0	50	0
5102	Operations	region_7	Bachelor's	m	sourcing	1	24		1	0	56	0
29521	Technology	region_15	Bachelor's	m	other	1	27	3	4	0	78	0
51164	Technology	region_14	Bachelor's	f	other	1	31	4	4	1	78	0
17812	Technology	region_27	Bachelor's	f	sourcing	1	30	4	2	0	77	0
50593	Finance	region_23	Bachelor's	m	sourcing	1	31		1	0	56	0
73735	Analytics	region_25	Bachelor's	m	other	1	30	5	3	0	84	0
29313	Finance	region_22	Bachelor's	m	sourcing	1	28	3	2	0	57	0
36904	Sales & Marketing	region_15	Bachelor's	m	other	1	29	3	2	0	51	0
62552	Sales & Marketing	region_22	Master's & above	m	sourcing	1	46	3	11	0	51	0
63285	Technology	region_29	Bachelor's	m	sourcing	1	31	5	4	0	80	0
74203	Procurement	region_5	Bachelor's	m	sourcing	1	28	1	4	0	72	0
75344	Sales & Marketing	region_4	Master's & above	m	other	1	31	4	6	0	50	0
74018	HR	region_7	Master's & above	f	other	1	37	3	9	0	48	0
35930	Procurement	region_2	Bachelor's	m	sourcing	1	25	5	3	0	70	1
6708	Operations	region_22	Master's & above	m	sourcing	1	40	4	4	0	57	0
5515	Operations	region_13	Master's & above	m	other	1	43	3	7	0	56	1
53373	Operations	region_13	Bachelor's	m	other	1	36	1	5	0	56	0
69316	Legal	region_29	Bachelor's	m	sourcing	1	29	3	3	0	63	0
50622	Analytics	region_25	Master's & above	m	other	1	34	5	2	0	84	0
30106	Sales & Marketing	region_16	Bachelor's	f	sourcing	1	32	4	4	0		0
45157	HR	region_4	Bachelor's	m	other	1	27		1	0	50	0
23523	Technology	region_26	Bachelor's	m	sourcing	1	29	3	5	0	75	0
74349	Sales & Marketing	region_5	Bachelor's	m	sourcing	1	34	1	4	0	48	0
70543	Procurement	region_2	Master's & above	m	sourcing	1	37	5	7	0	70	0
42245	Procurement	region_22	Bachelor's	f	other	1	33	3	3	0	73	0
34405	Procurement	region_2	Master's & above	f	other	1	33	5	4	0	67	0
4134	Sales & Marketing	region_16	Bachelor's	f	other	1	39	1	8	0		0
23599	Technology	region_23	Master's & above	m	other	1	34	4	7	0	82	0
5281	Sales & Marketing	region_7	Master's & above	m	other	1	34	4	6	0	53	0
197	Finance	region_12	Bachelor's	m	other	1	29	5	6	0		0
26773	Technology	region_7	Bachelor's	f	other	1	28	2	5	0	75	0
53841	Operations	region_2	Bachelor's	m	sourcing	1	43	2	12	0	57	0
28314	Finance	region_26	Bachelor's	m	other	1	23		1	0		0
30196	Analytics	region_25	Bachelor's	m	sourcing	1	29	5	6	0	84	0
29757	Sales & Marketing	region_14	Bachelor's	m	sourcing	1	43	3	15	0	51	0
9863	Procurement	region_27	Bachelor's	m	sourcing	1	26	4	4	0	70	0
34306	Procurement	region_13	Bachelor's	f	other	1	31	5	5	0	72	0
34041	Operations	region_7	Bachelor's	m	other	1	40	4	11	0	58	0
51669	Technology	region_2	Master's & above	m	other	1	47	4	4	0	77	0
33825	Sales & Marketing	region_17	Bachelor's	m	other	1	34	4	7	0	48	1
6254	Operations	region_2		f	other	1	33	4	9	0	64	0
11645	Sales & Marketing	region_23	Master's & above	m	other	1	41	5	7	0	51	0
3231	Technology	region_7	Bachelor's	m	other	1	29	1	4	0	80	0
7030	Analytics	region_31	Bachelor's	f	other	1	32	3	4	0	86	0
54198	Procurement	region_7	Master's & above	f	other	1	47	5	9	0	68	0
62293	Operations	region_27	Bachelor's	m	other	1	35	4	3	0	65	0
25312	Technology	region_22	Bachelor's	m	other	1	27	4	2	0	75	0
75610	Analytics	region_32	Bachelor's	m	other	1	29	1	3	0	81	0
53630	Sales & Marketing	region_23	Master's & above	f	sourcing	1	34	4	5	1	94	1
72423	Operations	region_2	Master's & above	m	sourcing	1	39	3	2	0	60	0
73022	Sales & Marketing	region_25	Bachelor's	m	other	1	26	5	2	0	51	0
63976	Operations	region_31	Bachelor's	f	sourcing	1	30	5	4	0	56	0
60761	Operations	region_16		f	other	1	31	4	2	0	62	0
57228	HR	region_2	Master's & above	m	sourcing	1	44	5	6	0	48	0
14912	Sales & Marketing	region_1	Bachelor's	m	other	1	38	3	4	0	49	0
22725	Technology	region_26	Bachelor's	m	other	1	40	1	3	0	78	0
18981	Legal	region_2	Master's & above	m	sourcing	1	50	5	6	1	58	0
50845	Procurement	region_19	Master's & above	m	other	1	44	3	12	0	70	0
11800	Procurement	region_2	Below Secondary	f	other	1	23	1	2	0	69	0
16351	Sales & Marketing	region_7	Master's & above	f	sourcing	1	36	1	2	0	53	0
75881	Analytics	region_27	Bachelor's	m	sourcing	1	25	1	4	0	80	0
73200	Operations	region_28	Bachelor's	m	sourcing	1	34	5	4	0	58	0
17833	Analytics	region_4	Bachelor's	m	sourcing	1	28		1	0	85	0
40187	Procurement	region_12	Bachelor's	m	sourcing	1	35	1	8	0	67	0
70193	Analytics	region_6	Bachelor's	m	sourcing	1	33	4	8	0	86	0
27188	Analytics	region_13	Master's & above	m	other	1	30	3	4	0	80	0
52231	Operations	region_2	Bachelor's	m	sourcing	1	43	3	3	0	58	0
76661	Procurement	region_17	Bachelor's	m	other	1	31	5	3	0	68	0
50595	Operations	region_2	Bachelor's	f	other	1	43	4	12	0	58	0
67673	Operations	region_4	Bachelor's	f	other	1	35	5	9	0	60	0
73405	Operations	region_2	Master's & above	m	other	1	50	3	8	0	59	0
73114	HR	region_17	Bachelor's	f	other	1	26	4	3	0	50	0
22572	Sales & Marketing	region_27	Bachelor's	m	sourcing	1	32	3	5	0	52	0
62923	Operations	region_13	Master's & above	f	other	1	38	5	2	1	93	1
57235	Sales & Marketing	region_26		m	other	1	22	4	2	0	51	0
22300	HR	region_20	Bachelor's	m	other	1	28		1	0	52	0
24090	Procurement	region_14	Bachelor's	f	sourcing	1	37	3	9	0	69	0
25629	Sales & Marketing	region_11	Bachelor's	m	sourcing	1	36	3	8	0	51	0
71339	Technology	region_6	Bachelor's	m	other	1	35	3	8	0	78	0
54714	Analytics	region_29	Bachelor's	m	other	1	39	3	4	0	85	0
7390	Operations	region_12	Bachelor's	f	sourcing	1	31	5	4	0	63	0
39107	Sales & Marketing	region_22	Bachelor's	m	sourcing	1	28	1	2	0	48	0
42636	Sales & Marketing	region_26	Bachelor's	m	sourcing	1	29		1	0	54	0
32557	Analytics	region_20	Bachelor's	m	sourcing	1	30	3	4	0	84	0
24414	R&D	region_2		m	other	1	25		1	0	76	0
63237	Technology	region_22	Bachelor's	m	referred	1	26	4	2	0	82	0
32838	Technology	region_7	Bachelor's	m	other	1	31	4	4	0	78	0
23003	Technology	region_14	Bachelor's	f	other	1	38	5	7	0	82	0
45198	Sales & Marketing	region_13	Bachelor's	m	other	1	39	4	9	0	49	0
40376	Sales & Marketing	region_4	Bachelor's	m	other	1	30	5	4	1	50	0
60176	Procurement	region_15	Master's & above	f	other	1	34	5	8	0	67	0
67652	Procurement	region_23	Master's & above	f	other	1	33	3	5	0	72	0
15476	Technology	region_2	Bachelor's	f	other	1	29	5	3	0	78	0
55811	Operations	region_2	Bachelor's	m	sourcing	1	28	4	2	0		0
15737	Finance	region_22	Bachelor's	m	sourcing	1	24		1	0	56	0
73435	Legal	region_22	Bachelor's	m	sourcing	1	34	5	4	0	64	0
51255	Sales & Marketing	region_27	Bachelor's	m	sourcing	1	35	3	7	0	46	0
70060	Technology	region_13	Master's & above	m	other	1	43	3	14	0	79	0
51473	Sales & Marketing	region_15	Bachelor's	m	other	1	34	1	8	0	39	0
76080	Operations	region_7	Bachelor's	f	other	1	34	1	5	0	54	0
33357	Operations	region_22	Bachelor's	m	sourcing	1	41	4	4	0	63	0
26409	Operations	region_2	Bachelor's	m	other	1	33	4	3	0		0
59608	Sales & Marketing	region_2	Master's & above	f	other	1	41	4	5	0	48	0
48756	Operations	region_7	Bachelor's	f	sourcing	1	35	5	3	0	59	0
35873	Legal	region_2	Below Secondary	m	other	1	28		1	0	62	0
13970	Operations	region_33	Master's & above	m	other	1	36	3	4	0	60	0
49868	Technology	region_5	Bachelor's	m	other	1	45	3	15	0	87	0
25261	Procurement	region_7	Master's & above	m	other	1	38	4	7	0	66	0
44536	Sales & Marketing	region_27	Bachelor's	f	other	1	26	2	4	0	47	0
55550	Analytics	region_27		m	sourcing	1	31	3	4	0	85	0
27989	Analytics	region_34	Bachelor's	m	sourcing	1	32	3	7	0	87	0
12598	Analytics	region_6	Bachelor's	m	sourcing	1	29	4	4	0	78	0
32877	Sales & Marketing	region_2	Bachelor's	f	other	1	40	3	12	0	50	0
2177	Finance	region_16	Bachelor's	m	other	1	32	5	6	0	58	0
51771	Operations	region_17	Bachelor's	m	other	1	42	5	11	0	67	0
26026	Procurement	region_15	Bachelor's	f	sourcing	1	30	5	3	0	65	0
64977	Procurement	region_16	Bachelor's	f	other	1	24	3	2	0	70	0
44585	Sales & Marketing	region_30	Bachelor's	m	sourcing	1	35	3	7	0	56	0
56287	HR	region_2	Bachelor's	f	sourcing	1	22	3	2	0	47	0
12504	Technology	region_7	Bachelor's	f	other	1	46	4	17	0	85	0
49126	Technology	region_15	Bachelor's	m	other	1	29	2	5	0	77	0
66469	Finance	region_7	Bachelor's	m	other	1	26	1	3	0	59	0
53350	Operations	region_23	Bachelor's	m	other	1	35	4	5	0		0
22031	Procurement	region_2	Bachelor's	f	other	1	29	4	2	0	95	1
36185	Technology	region_13	Bachelor's	m	sourcing	1	30	2	9	0	79	0
58415	Sales & Marketing	region_7	Bachelor's	m	other	1	45	4	5	0	50	0
71763	Sales & Marketing	region_15	Bachelor's	f	other	1	30	1	6	0	47	0
62742	Finance	region_32	Bachelor's	m	sourcing	1	28	2	4	0	59	0
33619	Technology	region_2	Master's & above	m	sourcing	1	46	5	10	0	76	0
41212	Procurement	region_7	Bachelor's	m	sourcing	1	27	2	2	0	69	0
40204	Sales & Marketing	region_11	Bachelor's	m	sourcing	1	34	2	5	0	47	0
12559	Operations	region_22	Bachelor's	f	other	1	35	5	10	0	63	0
30433	Procurement	region_27	Bachelor's	m	other	1	36	4	3	0	66	0
13150	Procurement	region_2	Master's & above	f	other	1	58	1	13	0	70	0
9616	Finance	region_31	Bachelor's	m	other	1	29	4	4	0	57	0
26563	Procurement	region_2	Bachelor's	f	referred	1	33	3	3	0	67	0
38331	Operations	region_16	Bachelor's	f	other	1	32	5	6	0	62	0
18651	Legal	region_22	Below Secondary	m	other	1	25	5	2	0	59	0
11892	Procurement	region_12	Bachelor's	f	other	1	25		1	0	69	0
16859	Analytics	region_2	Master's & above	m	other	1	50	1	7	1	79	0
26107	Sales & Marketing	region_26	Bachelor's	m	other	1	30	1	7	0	53	0
22511	Technology	region_24	Bachelor's	m	sourcing	1	28		1	0	81	0
22865	Analytics	region_20	Master's & above	m	other	1	40	5	5	1	83	1
67467	Finance	region_2	Below Secondary	f	other	1	26	3	2	0		0
2268	Technology	region_13	Bachelor's	m	other	1	35	5	8	0	81	0
33517	Sales & Marketing	region_7	Master's & above	m	other	1	37	3	7	0	52	0
27605	Operations	region_22	Master's & above	m	other	1	34	3	3	0	75	1
69349	Operations	region_8	Bachelor's	m	sourcing	1	25	3	2	0	57	0
45496	Sales & Marketing	region_2		m	other	1	22	5	2	0	62	1
55425	Technology	region_2	Bachelor's	f	other	1	31	4	7	0	80	0
36547	Analytics	region_25	Bachelor's	m	sourcing	1	32	3	6	0	86	0
11205	Sales & Marketing	region_19	Bachelor's	m	sourcing	1	36	5	8	0	48	0
469	Technology	region_2	Bachelor's	f	sourcing	1	57	3	19	0	81	0
44703	Sales & Marketing	region_2	Bachelor's	f	sourcing	1	42	4	9	0	51	0
14847	Sales & Marketing	region_20	Bachelor's	m	other	1	28	3	3	0	48	0
72157	Analytics	region_2	Bachelor's	m	sourcing	1	41	3	3	0	86	0
51544	Procurement	region_12	Bachelor's	f	other	1	32	5	5	1	84	1
5128	Operations	region_2		m	other	1	48	3	8	0	57	0
37952	Operations	region_26	Master's & above	m	other	1	41	3	7	0	58	0
39914	Technology	region_2	Master's & above	m	other	1	31	5	4	0	82	0
74332	Sales & Marketing	region_26	Bachelor's	m	other	1	37	4	5	0	54	0
42886	Analytics	region_29	Bachelor's	m	other	1	30	1	4	0	84	0
53988	Finance	region_2	Below Secondary	m	other	1	26	5	2	0	60	0
49775	Sales & Marketing	region_13	Bachelor's	m	sourcing	1	44	5	11	0	42	0
66965	Operations	region_7	Bachelor's	f	sourcing	1	44	3	10	0	60	0
70197	R&D	region_22	Master's & above	m	other	1	30	4	2	0	96	1
66210	Operations	region_22	Below Secondary	m	other	1	24	3	2	0	59	0
71008	Sales & Marketing	region_27	Bachelor's	m	other	1	40	1	10	0	49	0
52132	Technology	region_11	Master's & above	m	other	1	32	3	5	0	80	0
72604	Sales & Marketing	region_2	Bachelor's	m	sourcing	1	40	5	7	0	53	0
55730	Sales & Marketing	region_26	Bachelor's	m	other	1	45	4	15	0	64	1
8284	Sales & Marketing	region_2	Bachelor's	f	other	1	34	5	5	0	60	1
69715	Operations	region_2		f	other	1	58	4	18	0	60	0
36117	Technology	region_24	Bachelor's	m	sourcing	1	35	3	7	0	82	0
56139	Sales & Marketing	region_16		m	other	1	24	4	2	0	51	0
15924	Sales & Marketing	region_23	Bachelor's	m	other	1	35	2	8	0	48	0
41776	Technology	region_23	Bachelor's	m	sourcing	1	31	1	2	0	81	0
25949	Operations	region_29	Bachelor's	m	other	1	33	3	5	0	60	0
51509	HR	region_2	Master's & above	f	sourcing	1	44	3	14	0	47	0
36936	Sales & Marketing	region_28		m	other	1	24	2	2	0	52	1
11337	Sales & Marketing	region_22	Bachelor's	m	sourcing	1	37	5	2	0	54	0
38318	Procurement	region_19	Bachelor's	m	other	1	32	3	8	0	69	0
60969	Operations	region_2	Bachelor's	f	other	1	33	5	7	0	57	0
72765	Operations	region_2		f	sourcing	1	53	3	11	0	57	0
54416	Sales & Marketing	region_15	Bachelor's	m	sourcing	1	30	2	5	0	49	0
4585	Analytics	region_15	Bachelor's	m	sourcing	1	35	5	3	0	81	0
64140	Technology	region_11	Bachelor's	m	sourcing	1	32	3	4	0	80	0
35746	Operations	region_15	Bachelor's	m	sourcing	1	45	3	9	0		0
6587	Procurement	region_13	Bachelor's	m	other	1	29		1	0	69	0
56233	Analytics	region_22	Bachelor's	f	other	1	24		1	0	86	0
15844	Operations	region_3	Master's & above	f	other	1	31	5	7	0	59	0
1497	Sales & Marketing	region_10	Master's & above	f	other	1	37	3	6	0	47	0
11488	Sales & Marketing	region_7	Master's & above	m	other	1	42	3	12	0	48	0
59616	Procurement	region_4	Master's & above	m	other	1	40	3	6	0	72	0
9002	Operations	region_2	Bachelor's	m	sourcing	1	37	5	5	0	64	0
63753	Operations	region_22	Bachelor's	m	other	1	50	3	8	0	57	0
9192	Operations	region_21	Bachelor's	m	other	1	28		1	0		0
30143	HR	region_2	Master's & above	f	referred	1	57	3	13	0	53	0
53301	Operations	region_2	Master's & above	m	sourcing	1	34	3	8	0		0
29073	Operations	region_2	Bachelor's	f	sourcing	1	34	5	8	0	54	0
36460	Operations	region_13	Bachelor's	m	other	1	29		1	0	62	0
3171	Operations	region_4	Master's & above	f	referred	1	32	4	7	0	59	0
55062	Operations	region_7	Bachelor's	f	sourcing	1	27	5	2	0		0
7908	Technology	region_33	Master's & above	m	other	1	46	3	17	0	83	0
70048	Sales & Marketing	region_1	Master's & above	m	other	1	37	3	10	0	49	1
63757	Sales & Marketing	region_2	Bachelor's	f	sourcing	1	48	4	13	0	52	0
19046	Technology	region_2	Bachelor's	m	other	1	40	5	12	0	84	0
37427	Technology	region_20	Bachelor's	m	other	1	32	3	6	0	73	0
58138	Sales & Marketing	region_20	Bachelor's	m	other	1	33	1	7	0	48	0
68064	Procurement	region_23	Bachelor's	f	other	1	35	3	6	0	66	0
6711	Sales & Marketing	region_6		m	sourcing	1	23	3	2	0	51	0
51002	Analytics	region_15	Master's & above	m	other	1	32	3	4	0	86	0
15801	Operations	region_26	Bachelor's	f	other	1	40	4	13	0	60	0
47265	Procurement	region_2	Master's & above	m	other	1	43	2	7	0	70	0
26798	Operations	region_32	Master's & above	m	other	1	38	3	6	0	60	0
72203	Sales & Marketing	region_7	Bachelor's	m	other	1	36	5	8	0	49	0
46862	Procurement	region_7	Master's & above	m	other	1	49	5	20	0	65	0
75629	Sales & Marketing	region_22	Bachelor's	f	sourcing	1	32	1	4	0	50	0
37017	Analytics	region_7	Bachelor's	m	sourcing	1	55	3	18	0	87	0
76427	HR	region_22	Master's & above	f	other	1	35	3	5	0	50	0
46925	Operations	region_9	Master's & above	f	other	1	36	4	6	0	59	0
43828	Sales & Marketing	region_30	Bachelor's	m	other	1	29	5	4	0		0
58383	Procurement	region_4	Bachelor's	m	other	1	46	3	19	0	72	0
46166	Sales & Marketing	region_2	Bachelor's	m	other	1	51	5	19	0	40	0
11123	Sales & Marketing	region_29	Master's & above	m	other	1	37	3	7	0	54	0
67946	Analytics	region_32		m	other	1	27	3	2	0	88	0
41763	Sales & Marketing	region_26		m	other	1	43	1	4	0	49	0
40628	HR	region_32	Bachelor's	f	other	1	31	3	7	0	51	0
63083	Sales & Marketing	region_2	Master's & above	f	other	1	43	1	10	0		0
3540	Technology	region_22	Master's & above	f	sourcing	1	30	3	2	0	79	0
51292	HR	region_2	Bachelor's	f	other	1	49	5	22	0	50	0
137	Analytics	region_7	Master's & above	m	other	1	49	4	5	0	90	0
73204	Sales & Marketing	region_7	Master's & above	m	sourcing	1	36	2	5	0	48	0
73753	Procurement	region_10	Master's & above	m	sourcing	1	33	1	3	0	71	0
22462	Sales & Marketing	region_32	Bachelor's	f	other	1	29		1	0	53	0
36905	Operations	region_7	Bachelor's	m	other	1	37	3	11	0	56	0
16004	Finance	region_22	Below Secondary	m	other	1	25	3	3	0		0
10002	HR	region_2	Below Secondary	m	sourcing	1	24		1	0	52	0
43176	Technology	region_7	Master's & above	f	referred	1	37	4	13	0	79	0
12538	Operations	region_14	Bachelor's	m	other	1	35	5	10	0	59	1
56140	Technology	region_13	Bachelor's	f	other	1	33	3	4	0	76	1
71196	Procurement	region_2	Bachelor's	f	sourcing	1	33	5	9	0	71	0
57893	Technology	region_2	Bachelor's	f	other	1	59	3	28	0	78	0
5640	Analytics	region_2	Bachelor's	m	sourcing	1	29		1	0	88	0
41208	Operations	region_2	Bachelor's	f	other	1	38	2	8	0	59	0
55857	Operations	region_2	Bachelor's	m	sourcing	1	48	4	13	0	57	0
27907	Legal	region_11	Bachelor's	m	other	1	31	3	1	0	62	0
5933	Technology	region_5	Master's & above	f	sourcing	1	32	1	5	0	77	0
46639	Sales & Marketing	region_7	Bachelor's	f	sourcing	1	32	5	8	0	46	1
21523	Sales & Marketing	region_4	Bachelor's	m	other	1	31	3	2	0	48	0
65689	Sales & Marketing	region_2	Bachelor's	m	other	1	57	5	6	0		0
74019	Procurement	region_2	Master's & above	m	sourcing	1	42	1	4	0	70	0
76698	Operations	region_7	Bachelor's	f	other	1	45	3	4	1	65	1
70387	Operations	region_30	Master's & above	m	sourcing	1	41	3	3	0		0
56162	Technology	region_27	Master's & above	f	sourcing	1	41	1	11	0	74	0
26260	Sales & Marketing	region_24	Master's & above	m	sourcing	1	34	1	7	0	50	0
53188	Sales & Marketing	region_31	Bachelor's	m	sourcing	1	47	5	18	0	52	0
34074	Sales & Marketing	region_25	Master's & above	m	sourcing	1	33	5	7	0	51	0
38934	Operations	region_22	Master's & above	f	sourcing	1	48	3	15	0	69	1
39799	Operations	region_15	Bachelor's	m	other	1	34	4	3	0	60	0
40775	Sales & Marketing	region_1	Master's & above	m	other	1	35	5	4	0	47	0
41928	Analytics	region_1	Master's & above	m	sourcing	1	35	5	4	0	84	0
25351	Sales & Marketing	region_14	Master's & above	m	sourcing	1	45	3	17	0	49	0
72690	Sales & Marketing	region_9	Master's & above	f	sourcing	1	31	3	1	0	54	0
11666	Sales & Marketing	region_34	Bachelor's	m	sourcing	1	30	5	7	0	49	0
10167	Sales & Marketing	region_13	Bachelor's	m	sourcing	1	46	1	5	0	50	0
43399	Operations	region_2	Bachelor's	f	other	1	60	5	4	0	56	0
72916	Operations	region_27	Bachelor's	m	other	1	44	5	11	0	55	0
10360	Operations	region_6	Bachelor's	m	sourcing	1	38	4	8	0	55	0
66637	Technology	region_22	Master's & above	m	sourcing	1	39	3	5	0	80	0
63026	Sales & Marketing	region_26	Bachelor's	m	other	1	30	3	2	0	50	0
53981	Operations	region_5	Bachelor's	m	sourcing	1	31		1	0	65	0
66248	Sales & Marketing	region_7	Bachelor's	m	sourcing	1	57	4	3	0	50	0
73279	Sales & Marketing	region_2	Bachelor's	f	other	1	34	1	7	0	50	0
57365	Operations	region_2	Bachelor's	m	other	1	38	3	4	0	66	0
36691	Sales & Marketing	region_14		m	other	1	24		1	0	55	0
31987	Procurement	region_17	Master's & above	m	other	1	45	3	16	0	87	1
73265	Sales & Marketing	region_1	Master's & above	m	other	1	40	1	11	0	53	0
12930	Finance	region_2	Bachelor's	f	other	1	39	4	11	0	59	0
70371	Analytics	region_13	Bachelor's	m	sourcing	1	32	3	7	0	80	0
78119	Procurement	region_11	Bachelor's	f	other	1	36	3	4	0	72	0
50338	Sales & Marketing	region_2	Bachelor's	m	other	1	34	1	5	0	46	0
64630	HR	region_22	Master's & above	f	other	1	33	5	7	0	50	0
1830	Technology	region_2	Master's & above	m	sourcing	1	39	2	4	0	81	0
77734	Technology	region_2	Bachelor's	m	referred	1	31	3	6	0	77	0
51440	Sales & Marketing	region_22	Bachelor's	m	other	1	31	1	7	0	52	0
58579	Procurement	region_22	Bachelor's	f	other	1	25	3	3	0	68	0
38123	Sales & Marketing	region_4	Bachelor's	f	sourcing	1	43	5	4	0	50	0
57033	Operations	region_2	Bachelor's	m	sourcing	1	25		1	0	65	0
42513	Procurement	region_2	Master's & above	f	other	1	50	1	16	0	68	0
72935	Finance	region_32	Bachelor's	m	sourcing	1	28	3	2	0	59	0
16889	Sales & Marketing	region_17	Bachelor's	m	other	1	32	1	5	0	51	0
6181	Sales & Marketing	region_16	Bachelor's	m	sourcing	1	34	5	5	0	49	0
9025	Operations	region_16	Bachelor's	m	other	1	30	5	4	0	55	0
65024	Operations	region_7	Master's & above	f	sourcing	1	33	5	6	0	74	1
30900	Sales & Marketing	region_12	Bachelor's	m	sourcing	1	35	4	10	0	50	1
44381	Operations	region_7	Bachelor's	m	other	1	33	5	8	0	59	1
805	Operations	region_22	Bachelor's	m	sourcing	1	30	4	4	0	59	0
54127	Sales & Marketing	region_13	Bachelor's	m	other	1	28	4	5	0	52	0
63027	Technology	region_24	Master's & above	m	other	1	38	3	8	0	84	0
26944	Sales & Marketing	region_2	Bachelor's	f	sourcing	1	34	2	7	0	49	1
30551	Operations	region_12	Bachelor's	f	sourcing	1	29	2	7	0	60	0
74141	R&D	region_26	Bachelor's	m	sourcing	1	30	3	3	0	83	0
16399	Sales & Marketing	region_31	Bachelor's	m	sourcing	1	38	4	10	0	50	0
15369	Analytics	region_22		f	other	1	29	4	5	0	86	0
41337	HR	region_2	Master's & above	f	sourcing	1	53	4	25	0	47	0
633	Sales & Marketing	region_17	Bachelor's	f	sourcing	1	26	3	2	0	49	0
59337	Analytics	region_22	Master's & above	m	sourcing	1	26		1	0	84	0
3968	Procurement	region_10	Bachelor's	m	other	1	28	3	4	0	65	0
1709	HR	region_7	Bachelor's	f	sourcing	1	30	3	3	0	51	0
1588	Operations	region_15	Master's & above	m	other	1	59	4	4	0	56	0
573	R&D	region_22	Bachelor's	f	other	1	29		1	0	86	0
24750	Technology	region_14	Bachelor's	m	sourcing	1	31	3	4	0	83	0
9098	Procurement	region_7	Bachelor's	f	other	1	26	3	2	0	69	0
41768	Operations	region_19	Master's & above	f	sourcing	1	37	3	10	0	62	0
43660	Operations	region_8	Bachelor's	f	sourcing	1	25	3	1	0	62	0
8027	Technology	region_31	Bachelor's	m	other	1	27	2	3	0	78	0
15774	Operations	region_2	Master's & above	m	sourcing	1	39	4	10	0	60	0
4857	Analytics	region_28	Bachelor's	m	other	1	36	5	3	0	91	1
54550	Technology	region_8	Bachelor's	f	other	1	28		1	0	81	0
31552	Sales & Marketing	region_21	Bachelor's	m	other	1	30		1	0	50	0
76968	Procurement	region_22	Master's & above	m	sourcing	1	37	5	9	0	75	0
60095	Sales & Marketing	region_28	Master's & above	f	other	1	30	1	5	0	54	0
6731	R&D	region_29	Bachelor's	m	sourcing	1	30	5	1	0	96	1
39725	Technology	region_2	Bachelor's	m	other	1	45	4	3	0	83	0
70021	Procurement	region_23	Master's & above	m	other	1	36	3	7	0	71	0
22958	Sales & Marketing	region_11	Bachelor's	m	sourcing	1	37	3	4	0	50	0
72984	Operations	region_19	Bachelor's	m	other	1	37	5	6	0	59	0
63667	Procurement	region_26	Bachelor's	m	other	1	28		1	0	82	1
4147	Procurement	region_22	Master's & above	m	sourcing	1	40	3	12	0	70	0
28714	Sales & Marketing	region_3	Bachelor's	m	other	1	30	5	3	0	52	0
51959	Operations	region_31	Master's & above	m	other	1	36	4	7	0	56	0
68716	Sales & Marketing	region_15	Bachelor's	f	other	1	27	2	4	0	57	0
30802	Operations	region_11	Bachelor's	f	other	1	29	1	4	0	57	0
32970	Procurement	region_22	Master's & above	m	other	1	36	4	7	0	67	0
10936	Operations	region_12	Bachelor's	m	other	1	30	4	4	0	57	0
38445	Sales & Marketing	region_15	Bachelor's	m	sourcing	1	29	5	2	0	50	0
18621	Sales & Marketing	region_2	Bachelor's	f	other	1	29		1	0		0
25834	Procurement	region_2	Master's & above	f	other	1	51	3	15	0	71	0
333	Finance	region_22	Master's & above	m	other	1	32	3	8	0	58	0
28850	Technology	region_14	Master's & above	f	sourcing	1	36	3	5	0	83	0
30928	Finance	region_26	Bachelor's	f	sourcing	1	26	3	5	0	56	0
57206	Analytics	region_28	Bachelor's	m	sourcing	1	30	4	2	0	83	0
57587	Sales & Marketing	region_6	Bachelor's	f	other	1	28	1	2	0	50	0
29950	Sales & Marketing	region_26	Bachelor's	m	sourcing	1	40	3	18	0	55	1
1825	Legal	region_2	Bachelor's	m	other	1	33	1	6	0	66	0
5272	Operations	region_2	Below Secondary	f	sourcing	1	24		1	0	73	1
49389	Legal	region_27	Below Secondary	m	other	1	27		1	0	59	0
66875	Operations	region_29	Bachelor's	m	sourcing	1	30	4	2	0		0
51071	Sales & Marketing	region_4	Master's & above	f	sourcing	1	37	3	9	0	44	0
62499	Operations	region_2		f	other	1	33	3	9	0	58	0
77674	Sales & Marketing	region_31	Bachelor's	m	sourcing	1	43	3	3	0	48	0
70679	Sales & Marketing	region_2	Master's & above	f	other	1	39	1	10	0	52	1
20516	Sales & Marketing	region_2		m	other	1	24	3	2	1	81	1
45145	Procurement	region_4	Master's & above	m	other	1	41	2	12	0	71	0
45721	R&D	region_4	Master's & above	m	other	1	35	5	4	0	85	0
52241	Sales & Marketing	region_7	Bachelor's	m	sourcing	1	24		1	0	49	0
8386	Sales & Marketing	region_17	Master's & above	m	other	1	35	3	3	0	47	0
70491	Sales & Marketing	region_15	Bachelor's	m	sourcing	1	30	2	8	1	50	0
23241	Procurement	region_15	Bachelor's	m	other	1	29	3	2	0	68	0
54003	Sales & Marketing	region_6	Bachelor's	m	other	1	28	5	2	0	50	0
24843	Operations	region_2	Master's & above	f	other	1	48	5	15	0		0
35222	Technology	region_2	Bachelor's	m	other	1	31	3	3	0	79	0
47183	Sales & Marketing	region_1	Bachelor's	m	other	1	26	1	3	0	50	0
11943	Technology	region_27	Bachelor's	f	referred	1	30		1	0	76	0
57744	Operations	region_8	Master's & above	f	sourcing	1	38	3	2	0		0
29142	Sales & Marketing	region_31		m	sourcing	1	27	5	3	0	49	0
15620	Technology	region_2	Master's & above	f	other	1	49	1	24	0	77	0
44301	Technology	region_11	Bachelor's	f	other	1	32		1	0	80	0
24875	Operations	region_34	Bachelor's	m	other	1	26		1	0	65	0
61614	Sales & Marketing	region_2	Bachelor's	f	other	1	35	5	7	0	48	0
27459	Procurement	region_22	Master's & above	m	other	1	34	2	6	0	69	0
47584	Procurement	region_2		f	sourcing	1	53	1	11	0	67	0
75636	Sales & Marketing	region_4	Master's & above	m	sourcing	1	49	3	17	0	48	0
18390	Procurement	region_27	Master's & above	f	other	1	35	3	5	0	68	0
69146	R&D	region_22	Master's & above	m	other	1	34	4	4	0	83	0
60018	Operations	region_7	Master's & above	f	other	1	37	3	4	0	58	0
25354	Sales & Marketing	region_2	Bachelor's	m	other	1	47	4	16	0	48	1
3491	Analytics	region_12	Bachelor's	m	sourcing	1	28	2	5	0	85	0
74687	Sales & Marketing	region_14	Bachelor's	m	other	1	32	5	10	0	48	0
50049	Procurement	region_19	Bachelor's	m	other	1	34	3	4	0	71	0
30088	Operations	region_2		m	sourcing	1	36	4	3	0	59	0
45140	Legal	region_22	Bachelor's	m	other	1	32	2	6	0	59	0
72109	Sales & Marketing	region_8	Bachelor's	m	other	1	29	4	3	0	52	0
24397	Operations	region_22	Bachelor's	m	other	1	32	4	4	1	57	1
60571	Sales & Marketing	region_13	Bachelor's	m	other	1	34	5	4	0	51	0
59722	Sales & Marketing	region_16	Master's & above	f	other	1	36	3	8	0	48	0
27505	Operations	region_8	Bachelor's	m	sourcing	1	26	5	2	0	59	0
9072	Sales & Marketing	region_14	Master's & above	m	other	1	33	4	3	0	94	1
14939	Sales & Marketing	region_27	Master's & above	m	other	1	47	1	3	0		0
13888	Sales & Marketing	region_11	Bachelor's	m	other	1	42	3	2	0	48	0
44589	Sales & Marketing	region_26	Master's & above	m	other	1	38	1	8	0	54	0
57609	Procurement	region_17	Bachelor's	f	other	1	44	3	16	0	70	0
8470	Sales & Marketing	region_22	Master's & above	m	other	1	33	4	5	0	46	0
17190	Procurement	region_34	Bachelor's	m	other	1	29	5	4	0	84	1
48753	Analytics	region_2	Bachelor's	m	other	1	44	5	7	0	84	0
17602	Operations	region_8	Bachelor's	f	other	1	32	4	2	0		0
70593	Operations	region_21	Bachelor's	m	other	1	37	5	4	0	59	0
4445	Operations	region_22	Bachelor's	f	sourcing	1	37	3	5	0	59	0
47038	Sales & Marketing	region_14	Bachelor's	m	sourcing	1	32	1	4	0	52	0
31070	Procurement	region_23	Bachelor's	m	sourcing	1	36	3	2	0	66	0
20974	Finance	region_8	Bachelor's	f	other	1	30	3	3	0	65	0
64764	Technology	region_2	Bachelor's	m	sourcing	1	26		1	1	81	1
38060	Sales & Marketing	region_29	Master's & above	m	sourcing	1	31	1	2	0	51	0
40172	Technology	region_2	Bachelor's	m	referred	1	41	5	7	0	83	0
36808	Operations	region_2	Master's & above	m	sourcing	1	33	2	7	0	57	0
9763	Operations	region_20	Bachelor's	m	other	1	25	4	3	0	58	0
76038	Operations	region_7	Bachelor's	f	sourcing	1	39	3	6	0	58	0
71813	Procurement	region_12	Bachelor's	f	sourcing	1	31	3	6	0	70	0
42426	Technology	region_2	Master's & above	f	sourcing	1	56	2	16	0	79	0
61602	Sales & Marketing	region_14	Bachelor's	m	other	1	30	1	3	0	50	0
65518	Sales & Marketing	region_9	Master's & above	m	sourcing	1	31	4	3	0	50	0
68386	Analytics	region_11	Bachelor's	m	sourcing	1	30	1	2	0	84	0
51891	Procurement	region_7	Bachelor's	f	other	1	29	4	6	0	65	0
36931	Operations	region_19	Bachelor's	f	other	1	31	3	3	0	60	0
60567	Analytics	region_25	Bachelor's	m	other	1	30	3	6	0	84	1
22820	Procurement	region_2	Bachelor's	m	sourcing	1	26		1	0	72	0
11028	Operations	region_16	Bachelor's	m	sourcing	1	44	5	4	0	60	0
6425	Procurement	region_24	Master's & above	f	other	1	31	1	6	0	70	0
13047	Technology	region_33	Bachelor's	f	other	1	35	4	3	0	77	0
63491	Procurement	region_23	Master's & above	m	other	1	41	3	3	0	73	0
44748	Sales & Marketing	region_25	Bachelor's	m	other	1	33	5	7	0	47	0
32186	Technology	region_31	Bachelor's	m	sourcing	1	33	5	4	0	81	0
55275	Operations	region_2	Below Secondary	m	sourcing	1	26	5	3	0	60	0
48682	Sales & Marketing	region_13	Bachelor's	m	sourcing	1	47	4	19	0	48	0
74930	Sales & Marketing	region_11	Bachelor's	m	sourcing	1	28	5	5	0	51	0
45051	Sales & Marketing	region_13	Bachelor's	m	other	1	32	1	5	0	52	0
24675	Sales & Marketing	region_24	Bachelor's	m	other	1	36	3	10	0	50	0
38163	Technology	region_7	Bachelor's	f	other	1	29	5	2	0	81	0
14988	Operations	region_2	Bachelor's	m	sourcing	1	48	2	4	0	58	0
58180	Operations	region_2	Bachelor's	f	other	1	39	2	5	0	63	0
20295	Operations	region_2	Master's & above	m	other	1	53	4	19	0	57	0
71073	Sales & Marketing	region_22	Bachelor's	m	other	1	42	3	4	0	53	0
47279	Analytics	region_34	Bachelor's	m	sourcing	1	30	1	4	0	82	0
40019	Analytics	region_27		m	other	1	31	4	6	0	86	0
50781	Operations	region_8	Bachelor's	m	other	1	26	5	3	0	56	0
64947	Sales & Marketing	region_7	Bachelor's	m	other	1	35	5	3	1		1
31258	Sales & Marketing	region_7	Bachelor's	m	sourcing	1	45	1	5	0	52	0
69912	Operations	region_2	Bachelor's	f	other	1	42	5	10	0	59	0
38974	Sales & Marketing	region_7	Master's & above	m	other	1	43	5	14	0	50	0
39544	Operations	region_11	Bachelor's	m	other	1	27	5	2	0	58	0
5303	Sales & Marketing	region_34	Bachelor's	m	other	1	26		1	0	48	0
14189	Sales & Marketing	region_15	Master's & above	m	sourcing	1	38	1	10	0	50	0
35644	Analytics	region_9	Master's & above	m	other	1	31	4	5	0	82	0
23232	Operations	region_15	Bachelor's	f	sourcing	1	30	2	2	0	64	0
28851	Procurement	region_2		f	sourcing	1	37	4	11	0	70	0
8174	Sales & Marketing	region_16	Master's & above	m	other	1	35	1	4	0	48	0
54321	Technology	region_7	Bachelor's	m	sourcing	1	30		1	0	78	1
32272	Operations	region_13	Master's & above	m	other	1	42	4	7	0	59	0
31847	Procurement	region_22	Bachelor's	m	sourcing	1	33	2	7	0	68	0
11855	Sales & Marketing	region_11	Master's & above	m	other	1	39	4	4	0		0
70961	Sales & Marketing	region_7		m	sourcing	1	33	2	7	0	49	0
32378	Technology	region_13	Master's & above	f	other	1	43	4	6	0	81	0
45064	Operations	region_14	Bachelor's	f	sourcing	1	30	4	7	0	59	0
28533	Analytics	region_15	Master's & above	m	sourcing	1	37	3	3	0	85	0
1412	Technology	region_31	Bachelor's	m	other	1	33	4	6	1	81	0
15311	Sales & Marketing	region_1	Master's & above	m	sourcing	1	38	5	10	0	49	0
13825	Operations	region_22	Bachelor's	f	sourcing	1	24	5	2	0	55	0
36207	Operations	region_16	Bachelor's	f	sourcing	1	35	2	10	0	58	0
21794	Sales & Marketing	region_28	Master's & above	m	other	1	32	3	7	0	53	0
65504	Procurement	region_2	Master's & above	f	other	1	35	5	6	0	67	0
73508	Technology	region_2	Master's & above	f	sourcing	1	54	3	24	0	75	0
68754	Sales & Marketing	region_32	Bachelor's	m	other	1	33	2	3	0		0
6099	Sales & Marketing	region_22		f	sourcing	1	27		1	0	48	0
38271	HR	region_23	Master's & above	f	other	1	36	3	8	0	44	0
43497	HR	region_2	Master's & above	m	sourcing	1	45	3	3	0	51	0
14781	Finance	region_7	Bachelor's	m	sourcing	1	31	3	4	0	64	0
14576	HR	region_14	Bachelor's	m	other	1	39	3	11	0	53	0
45407	Procurement	region_15	Bachelor's	f	other	1	39	4	5	0	73	0
3124	Procurement	region_26	Bachelor's	f	other	1	25	2	2	0	66	0
70800	Operations	region_4	Master's & above	f	sourcing	1	37	5	8	1	99	1
35493	Technology	region_20	Bachelor's	m	other	1	29	5	3	0	80	0
25396	Sales & Marketing	region_6	Bachelor's	m	other	1	27	1	5	0	52	0
5283	Operations	region_2	Bachelor's	m	other	1	27	4	3	0	59	0
10067	Sales & Marketing	region_11	Bachelor's	m	other	1	47	4	6	0	51	0
46585	Finance	region_2	Master's & above	m	sourcing	1	36	4	3	0	55	0
3225	Operations	region_8	Bachelor's	m	other	1	35	5	9	0	58	0
55264	Sales & Marketing	region_8	Bachelor's	m	sourcing	1	35	3	8	0	51	0
63955	Sales & Marketing	region_23	Bachelor's	m	sourcing	1	26		1	0	47	0
69334	Finance	region_28	Master's & above	m	other	1	33	3	3	1	60	1
4310	Sales & Marketing	region_10	Master's & above	f	sourcing	1	32	2	5	0	56	0
45756	Procurement	region_19	Bachelor's	m	other	1	41	5	4	0	73	0
10377	Sales & Marketing	region_22		m	sourcing	1	26	4	2	0	53	0
35903	Finance	region_13	Master's & above	m	sourcing	1	40	5	4	0	58	0
50163	Operations	region_3	Bachelor's	f	sourcing	1	31	3	4	0	55	0
25255	Technology	region_7	Bachelor's	m	other	1	25	3	2	0	78	0
21623	Legal	region_2	Master's & above	m	other	1	58	3	15	0	60	0
701	Sales & Marketing	region_32	Bachelor's	f	other	1	27	1	4	0	53	0
3440	Sales & Marketing	region_27	Bachelor's	m	other	1	29	5	5	0	52	0
69785	HR	region_2	Bachelor's	f	other	1	28		1	0	43	0
69847	Operations	region_26	Bachelor's	f	other	1	32	4	2	0	59	0
49317	Finance	region_7	Master's & above	f	sourcing	1	36	5	2	0	57	0
1159	Procurement	region_2	Master's & above	f	other	1	37	3	3	0	72	0
19141	HR	region_32	Bachelor's	m	other	1	30	5	7	0	51	0
14262	Technology	region_23	Master's & above	m	sourcing	1	43	2	7	0	77	0
44397	Technology	region_29	Master's & above	f	other	1	31	3	5	0	81	0
54216	Operations	region_2	Bachelor's	m	sourcing	1	45	4	18	0		0
15431	Technology	region_17	Master's & above	m	other	1	34	5	5	0	81	0
36487	Technology	region_15	Master's & above	m	other	1	36	2	8	0	86	0
68345	Technology	region_26	Bachelor's	m	sourcing	1	25	4	3	0	80	0
11310	Sales & Marketing	region_32	Bachelor's	m	sourcing	1	28	4	4	0		0
5366	Finance	region_12	Bachelor's	m	other	1	31	2	5	0	60	0
73314	Procurement	region_2	Master's & above	f	other	1	49	5	7	0	73	0
11811	Technology	region_7	Master's & above	f	other	1	39	4	4	0	78	1
34277	Sales & Marketing	region_31	Bachelor's	m	sourcing	1	49	3	19	0	50	0
48381	Procurement	region_22	Master's & above	f	sourcing	1	37	3	9	0	67	0
5108	Technology	region_26	Bachelor's	f	sourcing	1	38	2	5	0	79	0
77379	Operations	region_2	Bachelor's	m	other	1	38	4	10	0	59	0
3144	Sales & Marketing	region_22	Master's & above	m	sourcing	1	44	1	9	0	54	0
69095	Technology	region_22	Bachelor's	m	referred	1	30	4	2	0	84	0
26952	Analytics	region_13	Master's & above	m	other	1	34	2	6	0	86	0
9431	Technology	region_22	Master's & above	f	sourcing	1	35	1	4	0	81	0
21346	Procurement	region_17	Bachelor's	f	other	1	38	2	4	0	65	0
49690	Procurement	region_26	Bachelor's	f	other	1	40	3	7	0	68	0
72435	Legal	region_2	Bachelor's	f	other	1	52	3	4	1	55	0
23578	Sales & Marketing	region_7	Bachelor's	m	sourcing	1	60	2	12	0	48	0
354	Operations	region_22	Bachelor's	m	other	1	32	2	5	0	62	0
58828	HR	region_26	Bachelor's	m	other	1	28	2	2	0	52	1
61780	Sales & Marketing	region_9	Bachelor's	m	sourcing	1	28	1	3	0	52	0
41693	Sales & Marketing	region_2	Master's & above	m	sourcing	1	33	4	5	0	49	0
28187	Sales & Marketing	region_28	Master's & above	f	other	1	31	3	1	0	47	0
66834	Sales & Marketing	region_28	Bachelor's	m	other	1	26	2	3	0	54	0
60503	Sales & Marketing	region_29	Bachelor's	m	other	1	30		1	0	47	0
8698	Operations	region_13	Bachelor's	f	sourcing	1	29	5	2	0	60	0
29130	Operations	region_22	Bachelor's	m	sourcing	1	43	2	11	0	57	0
31275	Sales & Marketing	region_27	Bachelor's	m	sourcing	1	32	1	6	0	47	0
27190	Operations	region_7	Bachelor's	m	sourcing	1	33	3	4	0	74	1
31822	Sales & Marketing	region_31	Bachelor's	m	sourcing	1	30	1	3	0	48	0
34642	Sales & Marketing	region_2		m	sourcing	1	23		1	0	44	0
38439	Procurement	region_2		f	sourcing	1	28	3	4	0	68	0
43073	HR	region_2	Master's & above	f	sourcing	1	43	5	11	0	51	0
58428	Operations	region_2	Bachelor's	m	other	1	44	4	15	0	55	0
64448	Analytics	region_22	Master's & above	f	other	1	33	3	2	0	84	0
15747	Sales & Marketing	region_29	Bachelor's	m	other	1	31	2	7	0	50	0
61038	Sales & Marketing	region_5	Master's & above	m	other	1	37	1	10	0	48	0
70844	Technology	region_16	Bachelor's	f	sourcing	1	37	3	11	0	79	0
26756	Sales & Marketing	region_27	Master's & above	m	sourcing	1	37	3	5	0	49	0
49548	Sales & Marketing	region_25	Bachelor's	m	other	1	28		1	0	46	0
26805	Operations	region_32	Bachelor's	m	other	1	36	4	3	0	74	1
58616	Operations	region_20	Bachelor's	f	other	1	30	5	5	0	56	0
12976	Operations	region_4	Bachelor's	f	other	1	26	3	5	0	60	0
32563	Sales & Marketing	region_22	Bachelor's	m	other	1	27	3	3	0	51	0
52952	Analytics	region_22	Bachelor's	m	referred	1	32	3	3	1	78	1
36491	Operations	region_26	Bachelor's	m	other	1	42	3	12	0	55	0
21474	Analytics	region_20	Bachelor's	m	sourcing	1	30		1	0	84	0
33441	R&D	region_4	Bachelor's	m	sourcing	1	35	5	7	0	89	0
26205	Technology	region_27	Bachelor's	m	other	1	28	2	2	0	79	0
54395	HR	region_2	Bachelor's	f	sourcing	1	27	5	5	0	46	0
645	Operations	region_7	Master's & above	f	sourcing	1	38	3	9	0	62	0
68530	Operations	region_9		m	sourcing	1	27	3	2	0	65	0
48281	Operations	region_15	Master's & above	m	sourcing	1	43	2	3	0	59	0
22848	Sales & Marketing	region_2	Master's & above	f	sourcing	1	34	5	9	0	49	0
37822	Technology	region_2	Master's & above	m	other	1	38	3	8	0	77	0
41650	Operations	region_27	Bachelor's	f	sourcing	1	25	1	2	0	57	0
604	Technology	region_26	Bachelor's	m	other	1	35	1	6	0	77	1
3290	Sales & Marketing	region_34	Bachelor's	m	sourcing	1	29	1	5	0	48	0
51109	Sales & Marketing	region_26	Bachelor's	m	other	1	40	1	6	0	55	0
4616	Technology	region_27	Bachelor's	f	sourcing	1	35	1	4	0	83	0
16149	Analytics	region_22	Bachelor's	m	other	1	34	3	3	0	89	1
39486	Procurement	region_2	Bachelor's	f	sourcing	1	37	1	2	0	64	0
52062	R&D	region_11	Master's & above	m	sourcing	1	29	3	2	0	84	0
15240	Technology	region_8	Master's & above	m	other	1	39	1	8	0	77	0
44620	Procurement	region_17	Bachelor's	m	sourcing	1	50	3	8	0	71	0
36260	HR	region_22	Bachelor's	f	sourcing	1	25	5	2	0	47	0
495	Sales & Marketing	region_27	Bachelor's	m	other	1	40	2	10	0	49	0
20877	Sales & Marketing	region_4	Bachelor's	f	other	1	30	3	8	0	50	1
46802	Procurement	region_20	Bachelor's	f	other	1	33	2	3	0	69	1
57617	Procurement	region_28	Bachelor's	f	other	1	32	3	3	0	70	0
58022	Technology	region_22	Master's & above	m	sourcing	1	39	2	7	0	78	0
38042	Operations	region_4	Bachelor's	m	other	1	52	4	10	0	60	0
14067	Procurement	region_7	Bachelor's	f	other	1	29	5	4	0	72	1
76377	Operations	region_2	Bachelor's	m	sourcing	1	48	5	17	0	58	0
40611	Sales & Marketing	region_26	Bachelor's	m	other	1	44	3	10	0	49	0
44100	Sales & Marketing	region_7	Master's & above	m	sourcing	1	42	5	11	0	54	1
66950	Sales & Marketing	region_2		m	other	1	29	4	2	0	47	0
396	Procurement	region_4	Master's & above	f	other	1	34	4	7	0	70	0
74313	Sales & Marketing	region_30	Master's & above	m	other	1	39	4	8	0	47	0
21865	Sales & Marketing	region_2	Master's & above	f	sourcing	1	38	2	8	0	51	0
3116	Technology	region_33	Bachelor's	m	other	1	47	3	16	0	80	0
3473	Operations	region_16	Bachelor's	m	other	1	29	3	3	0	66	0
35975	Sales & Marketing	region_2	Bachelor's	f	sourcing	1	36	2	7	0	50	0
35722	Technology	region_2	Bachelor's	m	sourcing	1	29	1	6	0	77	0
47118	HR	region_2	Master's & above	m	other	1	34	3	7	0	55	0
62522	Sales & Marketing	region_2	Bachelor's	m	sourcing	1	28		1	0	47	0
77337	HR	region_6	Bachelor's	m	other	1	29	1	3	0	51	0
31700	Procurement	region_17	Master's & above	f	other	1	36	3	4	0	81	1
22486	Sales & Marketing	region_14	Bachelor's	f	sourcing	1	29	4	3	0	52	0
2367	Analytics	region_13	Bachelor's	m	other	1	26	3	4	0	85	0
21568	Technology	region_2	Bachelor's	f	referred	1	49	5	6	0	80	0
12721	Technology	region_22	Bachelor's	m	sourcing	1	33	5	2	0	79	0
47809	Sales & Marketing	region_2	Bachelor's	m	referred	1	30		1	0	50	0
63126	Operations	region_22	Master's & above	m	other	1	43	4	3	0	59	0
53147	Sales & Marketing	region_4	Bachelor's	m	other	1	44	4	12	0	50	0
8926	Sales & Marketing	region_31		m	sourcing	1	25	4	3	0	47	0
35744	Sales & Marketing	region_28		m	other	1	25	4	3	0	64	1
58990	Operations	region_26	Master's & above	m	other	1	36	3	9	0	62	0
73359	Sales & Marketing	region_11	Bachelor's	m	sourcing	1	31	4	4	0	48	0
63931	Sales & Marketing	region_22	Bachelor's	m	sourcing	1	24	1	2	0	48	0
71831	R&D	region_4	Master's & above	m	other	1	32	5	5	0	78	0
70222	Sales & Marketing	region_2	Bachelor's	f	sourcing	1	51	1	13	0	51	0
34877	Analytics	region_29	Bachelor's	m	sourcing	1	29	5	3	0	87	0
25881	Finance	region_4	Bachelor's	m	sourcing	1	29		1	0	55	0
24309	Legal	region_2	Bachelor's	f	other	1	32		1	0	63	0
63754	Analytics	region_31		m	other	1	26	5	2	0	87	0
51739	Analytics	region_22	Bachelor's	m	other	1	31	3	4	0	85	0
30028	Procurement	region_2	Bachelor's	f	other	1	46	1	5	0	68	0
47808	Sales & Marketing	region_4	Bachelor's	m	other	1	38	4	6	0	46	0
70386	Operations	region_17	Bachelor's	m	sourcing	1	33	5	3	0	63	0
53048	Analytics	region_31		m	other	1	27		1	0	91	0
27292	Analytics	region_2	Bachelor's	f	other	1	30	4	5	0	91	0
12469	Procurement	region_15	Bachelor's	m	other	1	44	5	5	0	72	0
31205	Operations	region_2		f	sourcing	1	37	3	9	0		0
15463	Technology	region_2	Bachelor's	f	sourcing	1	50	3	23	0	80	0
43446	Technology	region_17	Bachelor's	m	other	1	36	4	5	0	78	1
47275	Sales & Marketing	region_18	Bachelor's	m	other	1	28	3	2	0	47	0
76654	Finance	region_22	Bachelor's	f	other	1	28	5	5	0	57	0
35011	Sales & Marketing	region_22	Bachelor's	m	sourcing	1	27		1	0	47	0
7977	Legal	region_2	Bachelor's	m	sourcing	1	30		1	0	63	0
34124	Technology	region_13	Bachelor's	m	other	1	49	3	16	0	78	0
77800	Sales & Marketing	region_29	Bachelor's	m	sourcing	1	35	3	10	0	49	0
66596	Sales & Marketing	region_25		m	other	1	26		1	0	51	0
62981	Sales & Marketing	region_30	Bachelor's	m	other	1	33	3	8	0	48	0
77405	Operations	region_7	Master's & above	m	sourcing	1	35	5	9	0	65	0
22628	Technology	region_16	Master's & above	f	other	1	39	3	10	0	81	0
72780	Technology	region_7	Master's & above	m	other	1	34	4	3	0	81	0
24725	Analytics	region_15	Bachelor's	m	sourcing	1	36	5	5	0	79	0
47127	Analytics	region_34	Bachelor's	m	other	1	29	3	3	0	87	0
22514	Sales & Marketing	region_13	Master's & above	m	sourcing	1	47	5	11	0	50	0
33769	Technology	region_4	Bachelor's	m	other	1	30	5	3	0	77	1
8865	Sales & Marketing	region_4	Bachelor's	m	other	1	40	3	4	0	52	0
47490	Operations	region_7	Master's & above	f	sourcing	1	47	3	20	0	63	0
42189	Operations	region_7	Bachelor's	f	other	1	46	3	8	0	57	0
27247	Sales & Marketing	region_2	Bachelor's	m	sourcing	1	55	5	5	0	53	0
59148	Sales & Marketing	region_17	Bachelor's	m	other	1	40	1	10	0	48	0
49815	Sales & Marketing	region_7		m	other	1	40	3	4	0	52	0
14961	Technology	region_13	Bachelor's	m	sourcing	1	28	3	5	0	77	0
64194	Procurement	region_2	Bachelor's	f	other	1	40	5	11	0	73	0
75820	Sales & Marketing	region_10	Master's & above	m	other	1	53	3	14	0	51	0
64730	Sales & Marketing	region_29	Bachelor's	m	other	1	33	1	4	0	50	0
60659	Sales & Marketing	region_22	Bachelor's	m	sourcing	1	45	4	12	0	47	0
29215	Sales & Marketing	region_13	Bachelor's	m	other	1	32	5	8	0	51	0
26801	Technology	region_14	Bachelor's	f	other	1	41	3	5	0	75	0
35433	Procurement	region_2	Bachelor's	f	other	1	46	4	16	0	74	0
36420	Procurement	region_22	Bachelor's	m	sourcing	1	28		1	0	72	0
15756	Analytics	region_2	Bachelor's	m	sourcing	1	39	4	9	0	81	0
45663	Operations	region_4	Master's & above	m	other	1	37	3	4	0	56	0
28674	Procurement	region_15	Master's & above	m	other	1	37	3	7	0	70	0
58227	Sales & Marketing	region_22	Bachelor's	m	sourcing	1	36	4	4	0	54	0
31260	Technology	region_13	Master's & above	m	other	1	53	4	17	0	81	0
72069	Technology	region_26	Bachelor's	m	sourcing	1	30	1	3	0	77	0
27470	Legal	region_34	Bachelor's	m	other	1	27	3	3	0	63	0
6751	Sales & Marketing	region_28	Master's & above	m	other	1	36	3	2	0		1
9055	Operations	region_2	Bachelor's	f	other	1	47	3	17	0	55	0
63769	Operations	region_23	Master's & above	f	other	1	41	5	13	0	62	0
64022	Operations	region_22	Below Secondary	m	other	1	25	3	3	0	55	0
25561	Technology	region_14	Master's & above	f	sourcing	1	34	3	8	0	78	0
5153	Analytics	region_29	Bachelor's	m	sourcing	1	33	1	2	0	87	0
54208	Sales & Marketing	region_15		m	other	1	36	4	4	0	51	0
47102	Operations	region_29	Bachelor's	m	other	1	40	4	5	0	54	0
38355	Operations	region_7	Bachelor's	m	other	1	46	4	5	0	62	0
73959	HR	region_2	Below Secondary	f	sourcing	1	20		1	0	47	0
63455	Finance	region_15	Master's & above	m	other	1	35	3	4	0	63	0
36293	Technology	region_26	Master's & above	m	sourcing	1	39	5	5	0	77	0
44592	R&D	region_2	Bachelor's	m	sourcing	1	35	3	7	0	86	0
77608	Operations	region_1	Bachelor's	f	sourcing	1	36	5	8	0	53	0
46849	Sales & Marketing	region_3	Bachelor's	m	other	1	32	5	5	0	47	1
59614	Sales & Marketing	region_25	Bachelor's	m	other	1	27		1	0	53	0
34529	Technology	region_13	Bachelor's	m	other	1	26	4	2	0	78	0
6428	Sales & Marketing	region_13	Bachelor's	m	sourcing	1	32	1	5	0	50	0
51366	Analytics	region_30	Bachelor's	m	other	1	26	5	2	0	82	0
61405	Technology	region_2	Master's & above	m	other	1	41	5	7	0	75	0
12122	HR	region_32	Bachelor's	f	sourcing	1	29	3	5	0	50	0
16458	Operations	region_4	Bachelor's	f	sourcing	1	39	5	9	0		1
986	Technology	region_26	Bachelor's	f	sourcing	1	26		1	0	79	0
60410	Technology	region_15	Bachelor's	f	other	1	31	3	5	0	82	0
75043	Operations	region_34	Bachelor's	m	other	1	31	3	6	0	58	0
45724	Technology	region_2	Master's & above	f	sourcing	1	39	3	9	0	78	0
37445	Sales & Marketing	region_31	Master's & above	m	sourcing	1	51	3	12	0	47	0
54561	Sales & Marketing	region_15	Bachelor's	m	sourcing	1	34	5	10	0	51	0
42648	Analytics	region_29	Bachelor's	m	sourcing	1	30	3	2	0	81	0
710	Analytics	region_22	Bachelor's	m	other	1	28		1	0	86	1
27439	Sales & Marketing	region_22	Bachelor's	m	sourcing	1	28	3	2	0	52	0
44281	Sales & Marketing	region_5	Bachelor's	m	sourcing	1	35	4	5	0	46	0
74186	Sales & Marketing	region_7	Bachelor's	m	sourcing	1	42	2	7	0		0
1060	Operations	region_2	Bachelor's	m	sourcing	1	57	3	14	0		0
67881	Operations	region_22	Bachelor's	m	sourcing	1	27	1	4	0	59	0
28831	Technology	region_31	Bachelor's	f	sourcing	1	36	3	7	0	79	0
63028	Sales & Marketing	region_7	Master's & above	m	sourcing	1	42	3	2	0	49	0
56269	Sales & Marketing	region_26	Bachelor's	m	sourcing	1	39	3	5	0	51	0
50281	Finance	region_2	Bachelor's	f	sourcing	1	52	5	8	0	59	0
26129	Sales & Marketing	region_22	Bachelor's	m	referred	1	29	3	2	0	55	1
20115	Operations	region_2	Bachelor's	f	other	1	52	4	4	0	60	0
66872	Sales & Marketing	region_7	Bachelor's	m	sourcing	1	39	4	7	0	50	0
10420	Operations	region_22	Bachelor's	f	other	1	31	3	2	0	58	0
9376	Sales & Marketing	region_13	Bachelor's	f	sourcing	1	36	3	13	0	52	0
9644	Sales & Marketing	region_32	Bachelor's	m	sourcing	1	30	3	5	0	46	0
6104	Operations	region_22	Bachelor's	m	sourcing	1	27	5	4	0	68	1
12	Technology	region_31	Bachelor's	m	other	1	24	3	2	0	77	0
34428	Technology	region_7	Master's & above	f	other	1	41	4	8	1	93	1
15349	Procurement	region_2	Bachelor's	f	other	1	50	3	4	0	69	0
77686	Sales & Marketing	region_15	Bachelor's	m	other	1	45	5	7	0	49	0
54502	Operations	region_23	Bachelor's	m	other	1	32	4	7	0	54	0
18868	Sales & Marketing	region_13	Bachelor's	m	referred	1	30	5	2	0	51	0
78191	Technology	region_24	Bachelor's	m	other	1	31	1	4	0	80	0
1595	Sales & Marketing	region_30	Bachelor's	m	sourcing	1	28		1	0	49	0
77787	Sales & Marketing	region_11	Master's & above	m	other	1	40	4	10	0	51	0
39039	Procurement	region_16	Bachelor's	m	other	1	31	2	5	0	69	0
73101	HR	region_31	Bachelor's	m	other	1	32	3	4	0	54	0
5106	Procurement	region_7	Bachelor's	m	sourcing	1	33	5	6	0	72	0
53700	Sales & Marketing	region_25	Master's & above	f	sourcing	1	35	1	7	0	50	0
9840	HR	region_25	Bachelor's	m	other	1	28	4	2	1	49	0
64374	Analytics	region_14	Bachelor's	m	other	1	27	4	3	0	89	0
32966	Technology	region_27	Bachelor's	m	other	1	29	1	6	0	82	0
23436	Technology	region_2		f	other	1	45	3	3	0	81	0
44418	Sales & Marketing	region_2	Bachelor's	m	sourcing	1	38	2	10	0	50	0
31188	Sales & Marketing	region_2	Master's & above	f	other	1	31	3	3	0	56	0
35961	Procurement	region_13	Master's & above	f	sourcing	1	34	4	4	0	68	0
76369	Sales & Marketing	region_17	Bachelor's	m	sourcing	1	42	3	15	0		0
2292	Analytics	region_7	Bachelor's	f	sourcing	1	34	1	3	0	83	0
25750	Operations	region_29	Bachelor's	m	sourcing	1	28	5	2	0	59	0
16981	Procurement	region_27	Master's & above	m	sourcing	1	38	4	10	0	68	0
32181	Technology	region_19	Bachelor's	m	sourcing	1	27		1	0	77	0
25096	Sales & Marketing	region_7	Bachelor's	f	other	1	30	1	2	0	52	0
57071	Analytics	region_22	Bachelor's	m	sourcing	1	34	3	3	0	83	0
4523	Operations	region_8	Master's & above	m	sourcing	1	38	3	5	0		0
69759	Analytics	region_29	Bachelor's	m	sourcing	1	25		1	0	88	0
52817	Operations	region_14	Master's & above	m	sourcing	1	36	4	8	0	56	0
46037	Technology	region_4	Bachelor's	f	sourcing	1	31	3	3	0	79	0
25150	Operations	region_15	Bachelor's	m	other	1	44	4	11	0	57	0
7120	Operations	region_7	Bachelor's	m	other	1	34	4	4	0		0
28304	Technology	region_15	Master's & above	m	other	1	41	1	3	0	77	0
12795	Procurement	region_2	Master's & above	f	sourcing	1	56	3	19	0	74	0
15389	Technology	region_2	Bachelor's	f	sourcing	1	32	3	4	0	82	0
52909	Operations	region_6	Bachelor's	f	other	1	39	3	10	0	59	0
34766	Procurement	region_22	Bachelor's	f	sourcing	1	27	3	3	0	68	0
29986	HR	region_2	Bachelor's	m	sourcing	1	39	4	4	0	44	0
24714	Sales & Marketing	region_30	Bachelor's	m	other	1	25	5	2	0	48	0
77668	Operations	region_22	Bachelor's	m	sourcing	1	36	1	9	0	60	0
25470	Operations	region_7	Bachelor's	f	other	1	31	5	4	0	59	0
23120	Sales & Marketing	region_4	Master's & above	m	sourcing	1	34	3	6	0	48	0
15898	Operations	region_15	Bachelor's	m	sourcing	1	57	5	6	0	57	0
37241	Sales & Marketing	region_3	Bachelor's	m	sourcing	1	41	4	3	0	50	0
37922	Sales & Marketing	region_2	Master's & above	m	other	1	59	4	16	0	50	0
76749	Procurement	region_11	Bachelor's	f	other	1	30	4	2	0	74	0
6704	Sales & Marketing	region_15	Bachelor's	m	other	1	40	3	12	0	47	1
34264	Sales & Marketing	region_22	Master's & above	f	other	1	30	3	5	0	54	0
47470	Operations	region_22	Master's & above	m	sourcing	1	31	5	6	0		0
63258	Technology	region_2	Bachelor's	m	sourcing	1	50	3	11	0	78	0
28016	Technology	region_30	Bachelor's	f	sourcing	1	27	1	3	0	84	0
45395	Operations	region_26	Bachelor's	f	other	1	36	4	9	0	56	0
51879	Technology	region_29	Bachelor's	m	other	1	34	1	3	0	79	0
72939	Operations	region_2	Bachelor's	f	other	1	33	4	6	0	60	0
48407	Operations	region_2	Bachelor's	m	sourcing	1	39	3	3	0	63	0
44081	Procurement	region_13	Bachelor's	f	other	1	30	3	4	0	67	0
76043	Procurement	region_7	Master's & above	m	other	1	32	1	6	0	69	0
18119	Sales & Marketing	region_15	Bachelor's	m	other	1	42	3	12	0	50	0
16900	HR	region_7	Master's & above	f	other	1	32	3	4	0	49	0
38230	Finance	region_7	Bachelor's	m	other	1	29	2	4	0	58	0
33936	Sales & Marketing	region_29	Bachelor's	m	other	1	32	1	7	0	54	0
45889	Technology	region_1	Master's & above	m	sourcing	1	37	3	6	0	81	0
23213	Technology	region_22	Master's & above	m	other	1	40	1	8	0	84	0
68096	Legal	region_22	Bachelor's	m	other	1	33	5	5	0	59	0
27543	Operations	region_4	Master's & above	m	sourcing	1	44	3	15	0		1
62221	Operations	region_13	Master's & above	f	other	1	49	4	18	0	60	0
24894	Sales & Marketing	region_2	Master's & above	f	other	1	50	3	4	0	51	0
14018	Operations	region_13	Bachelor's	f	other	1	29	4	3	0	59	0
72574	HR	region_31	Master's & above	f	sourcing	1	38	4	8	0	51	0
76325	Sales & Marketing	region_27		m	other	1	26	3	3	0	54	0
62595	Technology	region_2	Bachelor's	f	other	1	30	1	7	0	80	0
56013	Operations	region_4	Bachelor's	m	sourcing	1	28	3	6	0		0
69540	Technology	region_5	Bachelor's	f	sourcing	1	24		1	0	81	1
28657	Procurement	region_7	Master's & above	m	other	1	44	1	10	0	67	0
36952	Technology	region_7	Master's & above	m	sourcing	1	34	3	6	0	79	0
33438	R&D	region_30	Bachelor's	f	other	1	30	5	4	0	86	0
35797	Legal	region_2	Master's & above	m	other	1	44	4	2	0	58	0
22648	Operations	region_2	Master's & above	f	sourcing	1	41	5	6	0	60	0
62158	Procurement	region_2	Master's & above	m	other	1	58	3	31	0	72	0
49064	Operations	region_7	Master's & above	f	sourcing	1	34	4	9	0	59	0
18447	Sales & Marketing	region_22	Bachelor's	f	other	1	25	5	3	0	54	0
62538	Procurement	region_22	Master's & above	f	other	1	33	4	8	0	71	0
45895	HR	region_26	Bachelor's	m	other	1	28	1	2	0	51	0
58668	Procurement	region_15	Bachelor's	m	sourcing	1	33	3	6	0	69	0
60995	Operations	region_16	Master's & above	f	other	1	35	4	7	0	65	0
62098	Legal	region_2	Bachelor's	m	sourcing	1	30		1	0	63	0
46101	Operations	region_20	Bachelor's	m	sourcing	1	27	3	4	0	54	0
27372	Finance	region_22	Bachelor's	m	sourcing	1	25	4	4	0	63	0
34361	Legal	region_27	Bachelor's	m	other	1	28	1	3	0	60	0
65616	Procurement	region_17	Master's & above	m	sourcing	1	60	3	21	0	65	0
57560	Procurement	region_10	Master's & above	m	sourcing	1	32	3	7	0	72	0
40308	Operations	region_2	Bachelor's	f	sourcing	1	42	3	12	0		0
13560	R&D	region_29	Bachelor's	m	sourcing	1	29	3	3	0	79	0
44802	Technology	region_2	Bachelor's	m	sourcing	1	57	2	29	0	78	0
24803	Procurement	region_4	Master's & above	m	sourcing	1	38	2	4	0	71	0
10727	Procurement	region_22	Master's & above	f	other	1	35	2	3	0	70	0
76938	Technology	region_28	Bachelor's	m	other	1	28	5	4	1	91	1
55461	Operations	region_15	Bachelor's	m	other	1	24		1	0	59	0
22781	Technology	region_6	Bachelor's	m	sourcing	1	28		1	0	76	0
48965	Analytics	region_4	Bachelor's	m	sourcing	1	31	5	7	0	84	0
8422	Operations	region_22	Bachelor's	m	other	1	27	4	4	0	62	0
37770	Sales & Marketing	region_31		m	sourcing	1	24		1	0	53	0
6629	Technology	region_2	Bachelor's	m	sourcing	1	31	3	5	0	83	0
24109	Technology	region_2	Bachelor's	m	other	1	26	3	4	0	80	0
72720	Sales & Marketing	region_15		m	other	1	39	2	4	0	48	0
46035	Procurement	region_32	Bachelor's	m	other	1	34	3	11	0	75	0
65591	Technology	region_24	Bachelor's	m	sourcing	1	34	3	8	0	78	0
42661	Procurement	region_13	Bachelor's	f	sourcing	1	40	4	12	0	68	0
73853	R&D	region_4	Master's & above	m	other	1	42	4	8	0	85	1
35365	Sales & Marketing	region_14	Bachelor's	m	other	1	26		1	0	47	0
28878	Sales & Marketing	region_33	Bachelor's	m	other	1	34	1	8	0	47	0
58930	Operations	region_22	Bachelor's	m	other	1	46	2	6	0	65	0
31411	Operations	region_2	Bachelor's	m	other	1	36	5	8	0	58	0
44822	Operations	region_27	Bachelor's	f	other	1	23	2	2	0	58	0
55424	Procurement	region_15	Master's & above	m	referred	1	36	4	3	0	68	0
57220	Sales & Marketing	region_14		m	sourcing	1	25		1	0	51	0
64872	Procurement	region_21	Bachelor's	m	other	1	31	1	7	0	69	0
10225	Operations	region_13	Bachelor's	m	other	1	31	3	7	0		0
22140	Technology	region_26	Bachelor's	f	other	1	32	4	7	0	77	0
45557	Sales & Marketing	region_15	Bachelor's	m	other	1	33	4	8	0	52	0
39700	Sales & Marketing	region_13	Bachelor's	m	other	1	33	3	5	0	50	0
47586	Analytics	region_19	Bachelor's	m	other	1	35	3	7	0	84	0
404	Operations	region_15	Bachelor's	m	referred	1	36	4	7	0	58	0
13038	Legal	region_7	Master's & above	m	sourcing	1	54	3	7	1	54	0
54617	Procurement	region_2	Master's & above	f	other	1	44	3	15	0	69	0
12230	Sales & Marketing	region_11	Bachelor's	m	other	1	31	3	8	0	50	0
76197	Sales & Marketing	region_24	Master's & above	m	other	1	33		1	0	48	0
19612	HR	region_28	Bachelor's	m	other	1	33	3	4	0	51	0
62979	Procurement	region_19	Bachelor's	f	sourcing	1	31	4	3	0	68	0
180	Analytics	region_29	Bachelor's	m	sourcing	1	27	4	3	0	86	0
57808	Analytics	region_22	Master's & above	m	other	1	41	3	12	0	88	0
75110	Finance	region_26	Bachelor's	m	other	1	33	5	4	0	62	0
35207	Operations	region_27	Bachelor's	m	other	1	28	5	2	0	62	0
14613	Operations	region_2		f	sourcing	1	43	3	4	0	64	0
14584	Operations	region_4	Master's & above	m	sourcing	1	34	3	7	0	59	0
45253	Analytics	region_22	Bachelor's	f	sourcing	1	29	4	4	0	92	1
24293	Operations	region_7	Bachelor's	m	sourcing	1	31	3	8	0	57	0
45094	Procurement	region_5	Bachelor's	m	sourcing	1	35	3	8	0	68	0
69466	Procurement	region_15	Bachelor's	m	sourcing	1	28		1	0	71	0
5639	Procurement	region_13	Master's & above	f	other	1	30	1	2	0	66	0
36805	Analytics	region_29		m	sourcing	1	30		1	0	85	0
34543	Operations	region_19	Bachelor's	m	other	1	27	4	2	0	60	0
17536	Operations	region_7	Bachelor's	f	other	1	45	5	14	0	60	0
36340	Procurement	region_2	Master's & above	f	other	1	47	5	7	0	71	0
24177	Procurement	region_34	Master's & above	m	other	1	37	3	10	0	75	0
35480	Sales & Marketing	region_2		m	other	1	25	3	2	0	46	0
48067	Sales & Marketing	region_23	Bachelor's	f	sourcing	1	28	5	4	0	53	0
63292	Procurement	region_22	Bachelor's	m	sourcing	1	26		1	0	80	1
45571	HR	region_26	Bachelor's	m	other	1	28	5	7	0	51	0
33535	Sales & Marketing	region_7		m	sourcing	1	27	3	4	0	48	0
52397	Operations	region_22	Below Secondary	m	sourcing	1	22		1	0	58	0
70914	R&D	region_7	Bachelor's	m	other	1	32	3	7	0	85	0
44344	Sales & Marketing	region_13	Master's & above	f	sourcing	1	40	3	5	0	50	1
35745	Technology	region_16	Master's & above	f	sourcing	1	39	1	4	0	79	0
6759	Technology	region_27	Bachelor's	m	referred	1	27	4	4	0	78	0
35019	Operations	region_2	Bachelor's	f	other	1	25	4	2	0	58	0
76987	Procurement	region_7	Bachelor's	m	sourcing	1	36	2	3	0	68	0
19329	Technology	region_26	Bachelor's	f	other	1	29	3	5	0	79	0
21963	Procurement	region_22	Master's & above	m	other	1	44	4	10	0	70	0
21714	Sales & Marketing	region_19		m	sourcing	1	41	4	8	0	46	0
76470	Technology	region_17	Bachelor's	f	other	1	32	5	4	0	95	1
51688	Operations	region_15	Master's & above	f	other	1	37	5	7	1	65	0
63965	Sales & Marketing	region_2		f	other	1	30	1	4	0	50	0
67757	Operations	region_29	Bachelor's	m	sourcing	1	29	3	2	0	59	0
35070	Finance	region_22	Below Secondary	m	sourcing	1	24		1	0		0
76241	Operations	region_19	Bachelor's	m	other	1	36	5	10	0	58	0
64419	Sales & Marketing	region_19	Bachelor's	m	other	1	35	3	10	0	49	0
19919	Analytics	region_22	Bachelor's	m	other	1	20		1	0	84	0
45230	Legal	region_22	Bachelor's	m	other	1	29		1	0	62	0
8611	Technology	region_2		f	other	1	60	3	31	0	82	0
71070	Finance	region_2	Bachelor's	m	other	1	34	3	7	0	58	0
71200	Operations	region_15	Bachelor's	m	other	1	34	3	8	0	58	0
22207	Analytics	region_22		m	sourcing	1	29	4	7	0	87	0
15717	Technology	region_2	Below Secondary	f	other	1	24	1	2	0	74	0
70680	HR	region_22	Bachelor's	m	sourcing	1	28		1	0	51	1
19066	HR	region_7	Master's & above	f	other	1	42	4	11	0	54	0
28683	Operations	region_2	Bachelor's	f	other	1	35	2	7	0		0
14000	Sales & Marketing	region_13	Master's & above	m	other	1	35	4	3	0	44	0
56788	Technology	region_7	Bachelor's	f	referred	1	32	3	5	0	81	0
55451	Analytics	region_27	Bachelor's	m	other	1	30	3	5	0	85	0
61858	Procurement	region_34	Master's & above	m	other	1	37	5	10	0	67	0
26814	Sales & Marketing	region_33	Master's & above	m	other	1	40	1	5	0	51	0
74295	Procurement	region_13	Master's & above	f	other	1	36	3	6	0	67	1
60803	Operations	region_2	Master's & above	m	sourcing	1	45	3	12	0	60	0
62273	Sales & Marketing	region_2	Master's & above	m	other	1	47	3	4	0	48	0
9641	Procurement	region_7	Bachelor's	m	other	1	29	3	3	0	71	0
11330	Sales & Marketing	region_2	Bachelor's	m	referred	1	32	5	5	0	46	0
47740	Sales & Marketing	region_15		m	sourcing	1	31	3	6	0	44	0
32746	Operations	region_15	Bachelor's	f	sourcing	1	32	3	2	0	56	0
31629	Technology	region_2	Bachelor's	f	other	1	30	3	2	0	76	0
2991	Operations	region_4	Master's & above	f	other	1	45	4	18	0	59	0
70013	Analytics	region_31	Bachelor's	m	other	1	26	3	5	0	86	0
36259	Sales & Marketing	region_29	Bachelor's	m	other	1	29	3	2	0	47	0
27447	Analytics	region_22	Bachelor's	m	sourcing	1	39	3	10	0	85	0
24181	Finance	region_2	Bachelor's	m	other	1	30	3	5	0	60	0
14594	Sales & Marketing	region_13	Master's & above	f	sourcing	1	34	1	2	0	50	0
20467	Sales & Marketing	region_22	Master's & above	m	sourcing	1	32	5	7	0		0
312	Sales & Marketing	region_23	Bachelor's	m	sourcing	1	35	3	9	0		1
62432	Sales & Marketing	region_2	Master's & above	f	sourcing	1	45	2	4	0	51	0
46217	HR	region_22	Master's & above	m	other	1	39	3	12	0	55	0
30935	Technology	region_2	Master's & above	f	other	1	35	5	7	0	79	0
61280	Finance	region_15	Bachelor's	m	sourcing	1	30	5	8	0	58	0
49071	Sales & Marketing	region_33	Bachelor's	m	other	1	50	1	14	0	52	0
58446	Sales & Marketing	region_12	Bachelor's	m	sourcing	1	38	2	6	0	49	0
44874	Sales & Marketing	region_15	Bachelor's	m	other	1	28		1	0	49	0
1571	Operations	region_2	Master's & above	m	sourcing	1	57	4	16	0	64	0
6284	Operations	region_14	Bachelor's	m	sourcing	1	27	5	3	0	60	0
26844	Sales & Marketing	region_2	Bachelor's	f	sourcing	1	57	3	28	0	51	0
70024	Technology	region_13	Bachelor's	m	sourcing	1	49	3	24	0	80	0
1570	Operations	region_13	Bachelor's	m	other	1	34	3	3	0	68	1
7820	Sales & Marketing	region_2	Master's & above	m	other	1	40	3	5	0	49	0
21820	Technology	region_2	Bachelor's	f	sourcing	1	30		1	0	80	0
65198	Sales & Marketing	region_31		m	other	1	34	1	5	0	48	0
45312	Analytics	region_15	Bachelor's	m	other	1	37	5	11	1	86	1
49777	HR	region_2		m	sourcing	1	29	4	2	0	48	0
18112	Operations	region_2	Bachelor's	f	other	1	35	3	5	0	63	0
5974	Finance	region_2	Bachelor's	m	other	1	28	3	6	0	59	0
51581	Procurement	region_7	Bachelor's	f	other	1	39	4	5	0	68	0
28235	Analytics	region_10	Master's & above	m	other	1	35	5	3	0	85	0
74181	Procurement	region_16	Bachelor's	f	other	1	37	5	5	0	77	1
32731	Operations	region_15	Master's & above	f	other	1	33	1	9	0	60	0
67931	Procurement	region_5	Bachelor's	f	other	1	33	1	4	0	65	0
58959	Operations	region_16	Master's & above	f	sourcing	1	43	5	6	0	60	0
9710	Operations	region_7	Bachelor's	m	other	1	29	4	4	0		0
38194	Operations	region_28	Master's & above	f	other	1	33	1	8	0	64	0
77159	Analytics	region_5	Master's & above	m	sourcing	1	37	2	7	1	81	1
20957	Operations	region_22	Master's & above	f	other	1	36	4	9	0	57	0
5628	Sales & Marketing	region_2	Bachelor's	m	referred	1	36	5	9	0	52	0
54513	Technology	region_2	Bachelor's	m	referred	1	30	5	5	0	86	0
17679	Technology	region_2	Master's & above	m	other	1	45	4	16	0	80	0
2639	Operations	region_30	Bachelor's	f	other	1	26	4	6	0	60	0
76533	R&D	region_2	Bachelor's	m	other	1	35	3	5	0	89	0
44341	Sales & Marketing	region_21	Bachelor's	f	sourcing	1	31	5	5	0	48	0
11411	Operations	region_26	Bachelor's	m	sourcing	1	29	3	3	0	65	0
37115	Operations	region_2	Master's & above	m	other	1	33	3	5	0	57	0
66108	Sales & Marketing	region_29	Bachelor's	m	other	1	46	3	6	0	48	0
6405	HR	region_2	Master's & above	f	sourcing	1	51	5	16	0	52	0
15699	Sales & Marketing	region_13	Bachelor's	m	sourcing	1	41	3	11	0	46	0
16487	Technology	region_2	Bachelor's	f	other	1	55	5	3	0	80	0
67427	Technology	region_7	Master's & above	m	other	1	43	4	4	0	78	0
19508	Procurement	region_5	Bachelor's	f	other	1	33	3	8	0	71	0
14571	Technology	region_16	Bachelor's	f	sourcing	1	32	1	7	0	86	0
56332	Sales & Marketing	region_13	Master's & above	m	sourcing	1	33	5	3	0	51	0
8781	Technology	region_13	Bachelor's	m	other	1	29	3	2	0	76	0
30633	HR	region_7	Bachelor's	f	other	1	27	5	4	0	48	0
64524	Operations	region_4	Master's & above	f	other	1	35	4	6	0	59	0
72314	Procurement	region_7	Master's & above	f	sourcing	1	32	3	4	0	68	0
49834	Sales & Marketing	region_22	Bachelor's	m	sourcing	1	56	2	17	0	49	0
4905	Sales & Marketing	region_28	Master's & above	m	other	1	35	4	2	0	54	0
3907	Procurement	region_22	Bachelor's	f	other	1	34	5	2	0	65	1
19050	Analytics	region_31		f	other	1	27	1	4	0	88	0
54886	Technology	region_7	Bachelor's	m	sourcing	1	36	5	10	0	80	0
68919	Technology	region_13	Bachelor's	m	sourcing	1	38	5	4	0	93	1
11908	Sales & Marketing	region_7	Master's & above	f	other	1	33	2	4	0	51	0
13939	Operations	region_22	Master's & above	f	other	1	36	3	8	0	59	0
42539	Technology	region_2	Bachelor's	f	referred	1	33	5	6	0	80	0
19198	Sales & Marketing	region_6	Bachelor's	m	other	1	32	3	6	0	47	1
12297	Operations	region_19	Bachelor's	m	other	1	35	4	7	0	60	0
30368	Sales & Marketing	region_11	Bachelor's	m	sourcing	1	32	3	5	0	51	0
29790	Operations	region_15	Bachelor's	m	sourcing	1	43	3	3	0	56	0
63853	Sales & Marketing	region_34	Bachelor's	m	other	1	29	3	2	0	52	0
46197	Operations	region_31	Bachelor's	m	other	1	32	2	3	0		0
51624	Operations	region_21	Bachelor's	m	sourcing	1	31	4	5	0	59	0
37234	Operations	region_1	Master's & above	m	other	1	33	2	6	0	62	0
20897	Sales & Marketing	region_4	Master's & above	m	sourcing	1	44	5	8	0	49	0
50722	Sales & Marketing	region_6	Bachelor's	f	other	1	29	5	5	0	51	0
41194	Operations	region_10	Master's & above	m	other	1	31	5	6	0	57	0
17372	Sales & Marketing	region_20	Master's & above	m	other	1	30		1	0	46	0
6543	Procurement	region_10	Master's & above	f	other	1	30	3	8	0	69	0
84	Technology	region_23	Bachelor's	f	sourcing	1	31	3	4	0	76	0
22137	Operations	region_7	Master's & above	m	other	1	39	5	14	0	56	0
12034	R&D	region_25	Bachelor's	m	sourcing	1	32	3	7	0	83	0
66558	Sales & Marketing	region_2	Master's & above	m	other	1	50	5	5	0	53	0
30140	Analytics	region_28	Bachelor's	m	other	1	34	3	7	0	80	1
68560	Operations	region_2	Bachelor's	f	other	1	39	3	5	0	54	0
14995	Analytics	region_2	Bachelor's	m	other	1	54	3	16	0	82	0
72180	Legal	region_22	Bachelor's	f	other	1	33	4	8	0	59	0
55576	Operations	region_4	Master's & above	m	other	1	46	3	7	0		0
11567	Sales & Marketing	region_26		m	other	1	31	1	4	0	48	0
27107	HR	region_2	Master's & above	m	sourcing	1	48	1	15	0	49	0
68862	Sales & Marketing	region_1	Bachelor's	m	sourcing	1	30	3	2	0	47	0
28244	Sales & Marketing	region_2	Bachelor's	m	sourcing	1	29	1	4	0	49	0
33291	Technology	region_4	Bachelor's	m	sourcing	1	40	4	8	0	82	0
44971	Sales & Marketing	region_16		m	other	1	37	3	4	0	47	0
39809	R&D	region_4	Master's & above	m	sourcing	1	39	4	9	0	87	0
69098	HR	region_7	Master's & above	m	other	1	32	3	5	0	53	0
59449	Analytics	region_22	Bachelor's	f	other	1	30	5	7	0	81	0
63896	Analytics	region_4	Bachelor's	m	other	1	47	5	16	0	81	0
51858	Technology	region_14	Bachelor's	m	other	1	25	3	2	0	80	0
41757	Operations	region_32	Bachelor's	f	other	1	40	5	3	0	64	0
38668	Sales & Marketing	region_22	Bachelor's	f	other	1	26		1	0	51	0
2481	Procurement	region_2	Bachelor's	f	other	1	32	4	3	0	70	0
7733	Sales & Marketing	region_19	Bachelor's	m	sourcing	1	30	1	2	0	53	0
23136	Operations	region_27	Master's & above	m	other	1	46	5	14	0	58	0
72338	Sales & Marketing	region_26	Bachelor's	f	other	1	26	5	3	0	49	0
29682	Operations	region_7	Below Secondary	m	other	1	25	3	2	0		0
16620	Operations	region_27	Bachelor's	m	sourcing	1	28	2	3	0	62	0
10897	Sales & Marketing	region_3	Bachelor's	m	sourcing	1	26	4	3	0	47	0
66827	Operations	region_2		f	sourcing	1	36	4	2	0	60	0
25558	Operations	region_22	Bachelor's	f	sourcing	1	37	4	8	0		0
46304	Procurement	region_13	Master's & above	m	sourcing	1	35	4	6	0	74	0
1050	Technology	region_24	Bachelor's	m	other	1	30	2	7	0	81	0
7654	Finance	region_15	Bachelor's	m	sourcing	1	34	3	3	0	60	0
3809	Technology	region_3	Bachelor's	m	sourcing	1	26		1	0	81	0
14011	Procurement	region_26	Bachelor's	m	other	1	32	3	5	0	68	0
33004	Technology	region_7	Bachelor's	f	referred	1	30	5	6	0	79	0
13086	Sales & Marketing	region_7	Bachelor's	m	other	1	32	3	4	0	65	1
40110	Analytics	region_7	Master's & above	m	other	1	37	1	10	0	84	0
35067	Technology	region_2	Below Secondary	m	sourcing	1	30	3	2	0	81	0
37284	Operations	region_7	Master's & above	m	other	1	41	2	5	0	58	0
9165	Analytics	region_7	Master's & above	m	sourcing	1	35	4	5	0	86	0
15706	Technology	region_24	Bachelor's	m	other	1	45	1	15	0	75	0
19768	Technology	region_26	Bachelor's	m	sourcing	1	32	3	2	0	80	0
9852	Sales & Marketing	region_26		m	other	1	36	1	7	0	46	0
14727	Operations	region_15	Bachelor's	f	sourcing	1	43	4	7	0	53	0
55106	Operations	region_13	Bachelor's	f	sourcing	1	30	1	5	1	59	0
60464	Sales & Marketing	region_19	Master's & above	m	other	1	42	1	5	0	51	0
33520	HR	region_11	Bachelor's	m	sourcing	1	28	5	4	0	52	0
47817	Analytics	region_26	Bachelor's	m	other	1	26	4	3	0	84	0
19049	Operations	region_22	Master's & above	m	other	1	48	2	17	0	56	0
51802	Technology	region_10	Master's & above	m	sourcing	1	37	4	5	0	78	0
71140	Finance	region_4	Master's & above	m	other	1	34	1	3	0	59	0
21975	Procurement	region_2	Master's & above	f	sourcing	1	30	5	6	0	72	0
67964	Procurement	region_7	Bachelor's	m	other	1	36	3	4	0	72	1
25767	Sales & Marketing	region_20	Master's & above	m	sourcing	1	44	5	4	0	50	0
68211	Operations	region_31	Bachelor's	m	other	1	30	5	4	0	57	0
29839	Sales & Marketing	region_13	Bachelor's	m	other	1	54	5	11	0		1
71863	Finance	region_26	Bachelor's	m	sourcing	1	30	3	6	0	64	0
65698	Sales & Marketing	region_13	Bachelor's	f	sourcing	1	29	4	5	0	51	0
17408	Operations	region_2	Bachelor's	f	sourcing	1	36	4	2	0	59	0
7147	Procurement	region_8	Master's & above	m	sourcing	1	36	4	10	0	72	0
58326	HR	region_22	Master's & above	f	sourcing	1	35	5	6	0	44	0
21213	Procurement	region_13	Bachelor's	m	other	1	28		1	0	68	0
25635	Operations	region_13	Master's & above	f	other	1	49	5	9	0	56	0
30697	Operations	region_15	Bachelor's	f	other	1	27	5	4	0	59	0
62879	Procurement	region_19	Bachelor's	m	other	1	37	5	9	0	74	0
72585	Sales & Marketing	region_7	Bachelor's	f	other	1	30	3	6	0	54	0
4882	HR	region_2	Master's & above	m	sourcing	1	60	5	13	0	50	0
76419	Sales & Marketing	region_7	Master's & above	f	sourcing	1	42	4	4	0	48	0
59575	Sales & Marketing	region_2	Master's & above	m	sourcing	1	39	5	2	0	47	0
49318	Procurement	region_2	Bachelor's	f	sourcing	1	34	4	7	0	73	0
61950	Sales & Marketing	region_26	Bachelor's	m	other	1	51	3	19	0	43	0
23411	Operations	region_22	Master's & above	m	other	1	40	3	6	0	58	0
45967	Procurement	region_8	Bachelor's	m	other	1	29	5	4	0	71	0
74033	Sales & Marketing	region_27	Bachelor's	m	other	1	33	3	8	0	57	0
45193	Technology	region_26	Master's & above	m	sourcing	1	44	1	15	0	86	0
52679	Operations	region_7	Master's & above	m	sourcing	1	46	3	19	0	59	0
8073	Sales & Marketing	region_22	Bachelor's	m	other	1	36	4	5	0	50	0
71	Analytics	region_2	Bachelor's	m	sourcing	1	36	4	6	0	88	0
98	Technology	region_22	Master's & above	m	other	1	53	1	11	0	80	0
72214	Sales & Marketing	region_25	Bachelor's	m	other	1	27	2	3	0	53	0
43922	Analytics	region_31	Master's & above	m	other	1	37	5	3	0	86	0
59169	Procurement	region_2	Bachelor's	m	sourcing	1	34	3	2	0	70	0
30787	Technology	region_22	Bachelor's	f	other	1	26	5	3	0	80	1
45936	Sales & Marketing	region_22	Bachelor's	m	sourcing	1	42	1	2	0	51	0
8711	Procurement	region_17	Bachelor's	f	other	1	26	5	4	0	86	1
32140	Sales & Marketing	region_3	Bachelor's	m	other	1	34	4	9	0	46	1
19485	Analytics	region_32	Bachelor's	m	other	1	35	1	4	0	85	0
63123	Operations	region_15	Bachelor's	m	sourcing	1	36	5	3	0	54	0
12912	Sales & Marketing	region_19	Bachelor's	m	other	1	28	3	4	0		0
33534	Sales & Marketing	region_25	Bachelor's	m	other	1	27	3	4	0	50	0
43337	Operations	region_13	Bachelor's	m	sourcing	1	38	2	10	0		0
16573	Procurement	region_4	Master's & above	m	sourcing	1	43	4	4	0	66	0
50260	Operations	region_19	Master's & above	m	other	1	38	4	3	0	56	0
67503	Procurement	region_27	Bachelor's	m	sourcing	1	26	4	2	0	68	0
53736	Procurement	region_17	Bachelor's	f	sourcing	1	31	4	8	0	71	0
23784	Analytics	region_28	Bachelor's	m	sourcing	1	29	5	6	0	82	0
33778	Procurement	region_7	Bachelor's	m	other	1	30	3	6	0	76	0
62623	Procurement	region_4	Master's & above	m	sourcing	1	35	3	6	0	72	0
3241	Sales & Marketing	region_16	Bachelor's	m	other	1	42	2	14	0	48	0
77885	Technology	region_2	Master's & above	f	other	1	46	1	21	0	81	0
60032	Sales & Marketing	region_2	Master's & above	f	sourcing	1	49	3	15	0	52	0
55196	Analytics	region_30	Bachelor's	m	sourcing	1	28	3	4	0	86	0
26472	Technology	region_7	Master's & above	f	other	1	32	3	6	0	79	0
17005	HR	region_2	Master's & above	m	sourcing	1	31	4	6	0	46	0
63920	Operations	region_2	Master's & above	f	other	1	48	3	15	0	60	0
75311	Operations	region_14	Bachelor's	f	other	1	38	3	3	0	60	0
44384	Technology	region_10	Bachelor's	f	other	1	30	1	3	0	80	0
9419	Sales & Marketing	region_2	Bachelor's	m	sourcing	1	37	3	4	0	50	0
33157	Procurement	region_13	Master's & above	f	sourcing	1	34	3	4	0	66	0
2484	Analytics	region_11	Bachelor's	m	other	1	28	4	5	0	82	0
865	Sales & Marketing	region_22	Bachelor's	m	other	1	39	5	11	0	49	0
19502	Sales & Marketing	region_9	Bachelor's	m	other	1	28	3	2	0	51	0
43171	Analytics	region_16	Bachelor's	m	sourcing	1	38	1	8	0	86	0
72732	R&D	region_29	Master's & above	m	sourcing	1	28	4	2	0	91	0
35212	Technology	region_33	Bachelor's	m	other	1	29	3	3	0	78	0
8665	Operations	region_16	Bachelor's	m	other	1	35	5	3	0	59	0
65621	Technology	region_2	Bachelor's	m	other	1	30	5	6	1	86	1
63636	Sales & Marketing	region_2	Bachelor's	m	other	1	36	4	8	0	51	1
67600	Technology	region_27	Bachelor's	f	sourcing	1	28	4	2	0	78	1
7370	Sales & Marketing	region_21	Bachelor's	m	other	1	48	3	4	0	51	1
54219	Sales & Marketing	region_1	Master's & above	m	sourcing	1	31	3	5	0	46	0
51591	Procurement	region_31	Bachelor's	m	sourcing	1	43	5	11	0	70	0
68732	Procurement	region_2	Master's & above	f	sourcing	1	55	1	5	0	70	0
67661	Analytics	region_6	Bachelor's	m	other	1	34	3	6	0	85	0
17771	Procurement	region_26	Bachelor's	f	sourcing	1	39	3	2	0	69	0
52326	Sales & Marketing	region_20	Master's & above	m	other	1	44	3	7	0	52	0
65036	HR	region_25	Bachelor's	m	other	1	33	4	5	0	49	0
21317	Sales & Marketing	region_3	Bachelor's	m	other	1	26	5	2	0	48	0
10084	Sales & Marketing	region_20	Bachelor's	m	other	1	33	4	6	1	52	0
23316	Operations	region_13	Bachelor's	f	sourcing	1	33	3	7	0	57	0
5995	Analytics	region_2	Bachelor's	m	other	1	37	1	10	0	88	0
1515	Analytics	region_22	Bachelor's	m	other	1	35	4	7	0	82	0
50891	Analytics	region_22	Bachelor's	m	sourcing	1	34	1	5	0	86	0
13252	Operations	region_4	Bachelor's	m	sourcing	1	44	5	5	0	63	0
19715	Sales & Marketing	region_7	Master's & above	m	other	1	38	3	8	0	48	0
66755	R&D	region_11	Bachelor's	m	other	1	32	3	6	0	81	0
74058	Sales & Marketing	region_26	Bachelor's	m	sourcing	1	40	4	12	0	48	0
6367	Sales & Marketing	region_2	Bachelor's	m	other	1	28	2	6	0	51	0
63718	Sales & Marketing	region_2	Master's & above	m	other	1	43	5	5	0	52	0
36248	Technology	region_33	Bachelor's	m	sourcing	1	32	1	3	0	83	0
48935	Sales & Marketing	region_22	Bachelor's	f	other	1	28		1	0	46	0
28700	Analytics	region_29	Bachelor's	m	other	1	34	1	8	0	84	0
72832	HR	region_3	Master's & above	m	other	1	32	5	7	0	47	0
34583	Operations	region_2		f	sourcing	1	47	3	8	0	57	0
60218	Finance	region_7	Bachelor's	m	other	1	29	3	4	0	56	0
10027	Operations	region_7	Bachelor's	f	sourcing	1	32	4	5	0	99	1
67918	Operations	region_26	Bachelor's	m	sourcing	1	31	4	9	0	54	0
9306	Sales & Marketing	region_2	Bachelor's	m	other	1	34	5	6	0	51	0
42728	Operations	region_4	Master's & above	m	other	1	47	3	5	0		0
49361	Finance	region_31	Bachelor's	m	other	1	38	3	3	0	58	0
45450	Procurement	region_2	Bachelor's	m	other	1	34	2	8	0	68	0
35756	Legal	region_22	Master's & above	m	other	1	58	3	10	0	57	0
39223	Operations	region_2	Below Secondary	m	other	1	23		1	0	62	0
22127	Finance	region_15	Bachelor's	m	other	1	32	5	2	0	60	0
68969	Sales & Marketing	region_2	Master's & above	m	referred	1	32	5	4	0	51	0
10969	Analytics	region_32	Bachelor's	f	other	1	32	2	5	0	82	0
1646	Technology	region_7	Bachelor's	m	other	1	36	2	3	0	79	0
57075	Sales & Marketing	region_16	Bachelor's	m	sourcing	1	31	5	4	0	47	0
23259	Technology	region_2	Bachelor's	f	sourcing	1	24	4	2	0	84	1
39884	Operations	region_31	Bachelor's	f	other	1	33	3	7	0	55	0
23216	Procurement	region_13	Master's & above	f	other	1	34	5	7	0	74	1
42612	HR	region_7	Bachelor's	f	other	1	25		1	0	50	0
64544	Technology	region_2		m	sourcing	1	26	3	3	0	80	0
68179	Analytics	region_2	Bachelor's	m	other	1	48	5	5	0	83	0
36336	Sales & Marketing	region_26	Bachelor's	m	other	1	37	5	11	0	50	0
44757	HR	region_26	Bachelor's	f	other	1	31	3	5	0	46	1
9667	Technology	region_2	Bachelor's	m	other	1	30	1	7	0	79	0
13121	Sales & Marketing	region_9	Bachelor's	m	other	1	20	2	2	0	48	0
20684	Operations	region_22	Bachelor's	f	other	1	39	4	10	0	60	0
31231	Operations	region_11	Bachelor's	m	other	1	31	5	6	0	63	0
10416	Sales & Marketing	region_2	Master's & above	f	sourcing	1	36	4	3	0	49	0
67030	Legal	region_24	Bachelor's	m	sourcing	1	32	1	6	0	62	0
42195	Sales & Marketing	region_7	Bachelor's	f	other	1	38	5	4	0	55	0
75285	Analytics	region_2	Bachelor's	m	sourcing	1	41	3	13	0	82	0
23430	Sales & Marketing	region_7	Bachelor's	m	other	1	39	4	9	0	47	0
51287	Sales & Marketing	region_13	Master's & above	f	sourcing	1	31	3	8	0	48	0
44772	Operations	region_11	Master's & above	m	sourcing	1	33	3	10	0	58	0
38393	Procurement	region_2	Bachelor's	f	sourcing	1	39	4	9	0	74	0
22163	Procurement	region_29	Bachelor's	m	sourcing	1	31	1	3	0	70	0
19208	Sales & Marketing	region_7	Bachelor's	m	other	1	41	5	8	0	49	0
33956	Sales & Marketing	region_2	Bachelor's	f	other	1	30	4	4	0	47	0
37026	Operations	region_32	Bachelor's	m	other	1	35	3	10	0	60	0
56313	Analytics	region_22		f	other	1	28	4	2	0	83	0
51689	Sales & Marketing	region_30	Bachelor's	f	sourcing	1	33		1	0	49	0
13597	Analytics	region_2	Bachelor's	m	other	1	51	3	9	0	81	0
14658	HR	region_32	Bachelor's	m	sourcing	1	32	3	9	0	48	0
64360	Analytics	region_27	Bachelor's	m	other	1	29	3	5	0	81	0
55770	Sales & Marketing	region_23	Master's & above	m	sourcing	1	38	1	12	0	53	0
17455	Finance	region_26	Master's & above	m	sourcing	1	35	3	3	0		0
12847	Technology	region_22	Bachelor's	m	other	1	37	3	7	0	77	0
73283	Analytics	region_22		m	other	1	25		1	0	87	0
34964	Sales & Marketing	region_7	Bachelor's	m	sourcing	1	36	3	8	0	48	0
62239	HR	region_22	Bachelor's	m	other	1	30	4	5	0	53	0
4985	Operations	region_7	Master's & above	m	sourcing	1	51	3	17	0	59	0
60766	Finance	region_32	Bachelor's	m	other	1	28	3	2	0	56	0
59711	Sales & Marketing	region_22	Bachelor's	m	sourcing	1	27	1	3	0	48	0
15348	Operations	region_17	Bachelor's	f	sourcing	1	26	3	2	0	59	0
4527	Technology	region_22	Master's & above	m	other	1	48	1	15	0	80	0
52957	Technology	region_22	Master's & above	m	other	1	37	4	6	0	82	1
16254	Sales & Marketing	region_2	Master's & above	m	other	1	53	3	17	0	52	0
28469	Operations	region_16	Master's & above	f	other	1	44	1	14	0	62	0
16939	Sales & Marketing	region_17	Bachelor's	m	other	1	31	4	3	0	60	1
2954	Procurement	region_2	Bachelor's	f	other	1	27	3	4	0	73	0
53244	Sales & Marketing	region_2	Bachelor's	f	sourcing	1	38	1	5	0	49	0
48005	Technology	region_2	Bachelor's	m	referred	1	27	3	2	0	76	0
20723	Operations	region_4	Master's & above	f	other	1	34	3	5	0		0
693	Sales & Marketing	region_2		m	sourcing	1	42	1	4	0	49	0
13741	Legal	region_2	Bachelor's	m	sourcing	1	49	5	18	0	60	0
8691	Finance	region_25	Bachelor's	m	other	1	32	5	6	0	57	1
44105	Sales & Marketing	region_28		m	other	1	34	5	7	0	53	1
7714	Operations	region_4	Bachelor's	m	sourcing	1	45	3	3	0	62	0
59937	Finance	region_32	Bachelor's	m	sourcing	1	34	5	6	0	56	0
14332	Operations	region_26	Bachelor's	f	other	1	34	3	4	0	57	0
3036	Sales & Marketing	region_17	Bachelor's	m	other	1	32	1	6	0	50	0
64176	Procurement	region_11	Bachelor's	m	sourcing	1	30	3	3	0	72	0
19417	Sales & Marketing	region_16	Master's & above	m	sourcing	1	54	4	15	0		0
40938	Procurement	region_2	Master's & above	f	other	1	54	5	15	0	70	0
41901	Technology	region_4	Master's & above	m	sourcing	1	42	4	5	0	79	0
50167	Sales & Marketing	region_2	Bachelor's	m	sourcing	1	39	5	10	0	49	0
27678	Procurement	region_13	Bachelor's	f	sourcing	1	34	1	7	0	71	0
68354	Operations	region_27	Bachelor's	m	sourcing	1	43	1	6	0	57	0
10883	Sales & Marketing	region_32	Bachelor's	m	sourcing	1	27	2	4	1	46	0
42205	Sales & Marketing	region_2		m	other	1	20	5	2	0	43	0
52739	HR	region_27	Bachelor's	m	other	1	26	5	2	0	54	0
75808	Sales & Marketing	region_2	Bachelor's	f	other	1	32	4	3	0	50	0
56545	Finance	region_2	Bachelor's	f	other	1	35	4	8	0	55	0
65799	Finance	region_2	Master's & above	f	sourcing	1	38	5	3	0	60	0
38353	HR	region_6	Bachelor's	m	sourcing	1	24		1	0	50	0
45934	HR	region_13	Bachelor's	m	other	1	26	3	2	0		0
21806	Procurement	region_15	Master's & above	m	sourcing	1	39	2	6	0	71	0
66157	Analytics	region_2	Bachelor's	m	other	1	35	3	4	0	84	0
6402	Sales & Marketing	region_26	Master's & above	m	other	1	41	5	14	0		1
24075	Finance	region_2	Below Secondary	f	other	1	25	3	2	0	58	0
1420	Analytics	region_22	Bachelor's	f	other	1	26	5	3	0	85	0
73993	Analytics	region_22	Bachelor's	m	sourcing	1	39	5	12	0	86	0
14514	Sales & Marketing	region_15	Bachelor's	m	other	1	39	3	12	0	51	0
5310	Procurement	region_31	Bachelor's	m	sourcing	1	37	5	3	0	73	0
49242	Procurement	region_2	Master's & above	f	other	1	56	4	17	0	68	0
20956	Sales & Marketing	region_13	Master's & above	f	sourcing	1	35	3	4	0	54	0
63034	Sales & Marketing	region_7	Master's & above	m	other	1	37	5	7	0	50	0
25473	Operations	region_2	Master's & above	f	other	1	53	3	11	0	62	0
44480	Operations	region_23	Master's & above	f	sourcing	1	40	5	8	0	64	0
41573	Sales & Marketing	region_2	Bachelor's	f	other	1	35	4	7	0	54	1
42379	Sales & Marketing	region_14	Bachelor's	m	other	1	39	3	10	0	58	1
67098	Sales & Marketing	region_2	Master's & above	m	other	1	54	4	17	0	49	0
64597	Operations	region_5	Bachelor's	f	sourcing	1	31	5	7	0	62	0
63941	Procurement	region_7	Master's & above	m	other	1	43	3	14	0	67	0
72955	Operations	region_22	Bachelor's	m	sourcing	1	27	4	3	0	58	0
76331	HR	region_2	Below Secondary	f	sourcing	1	22		1	0	49	0
67901	Sales & Marketing	region_25	Bachelor's	f	other	1	30	5	2	0	56	0
70116	Sales & Marketing	region_28	Bachelor's	m	other	1	41	5	10	0	46	0
66509	Operations	region_4	Bachelor's	f	other	1	36	3	9	0		1
20098	Finance	region_7	Bachelor's	m	other	1	28	5	2	0	58	0
66451	Operations	region_13	Bachelor's	m	other	1	46	3	17	0		0
34720	Technology	region_7	Bachelor's	m	sourcing	1	33	5	6	0	82	0
54240	Sales & Marketing	region_15	Bachelor's	f	other	1	30	3	2	0	47	0
43028	Sales & Marketing	region_29	Bachelor's	f	other	1	31	3	7	0	47	0
32136	Finance	region_2	Master's & above	m	sourcing	1	59	4	30	0	65	0
51411	Sales & Marketing	region_22		m	sourcing	1	23		1	0	49	0
68192	Sales & Marketing	region_29	Master's & above	m	sourcing	1	38	1	7	0	46	0
11864	HR	region_2	Bachelor's	m	other	1	49	5	7	0	54	0
917	Operations	region_27	Bachelor's	m	sourcing	1	43	3	15	0	56	0
77120	Technology	region_5	Bachelor's	m	other	1	32	1	2	0	79	0
2703	Procurement	region_2	Below Secondary	m	other	1	26		1	0	69	0
73809	Operations	region_22	Bachelor's	f	sourcing	1	24	2	2	0	56	0
25590	Sales & Marketing	region_30	Bachelor's	m	other	1	39	4	7	0	48	0
74796	Sales & Marketing	region_16	Bachelor's	m	other	1	42	3	6	0	48	0
10120	Procurement	region_2	Master's & above	m	sourcing	1	38	2	8	0	71	0
42896	Operations	region_26	Bachelor's	f	sourcing	1	39	5	12	0	59	0
19978	Procurement	region_2	Master's & above	f	sourcing	1	31	3	5	0	66	0
50888	Operations	region_22		m	sourcing	1	28	3	6	0	60	0
45829	Operations	region_11	Bachelor's	f	sourcing	1	32	3	8	0	60	0
4653	Operations	region_2	Bachelor's	f	sourcing	1	32	5	10	0	69	1
44041	Technology	region_28	Master's & above	m	other	1	34	3	9	0	80	1
42028	Analytics	region_2		m	other	1	38	4	11	0	84	0
17944	Technology	region_7	Master's & above	m	sourcing	1	54	5	14	0	80	0
24023	Operations	region_7	Master's & above	f	other	1	56	5	7	1		1
65671	Procurement	region_13	Bachelor's	f	sourcing	1	31	3	6	0	69	0
49187	Sales & Marketing	region_26	Bachelor's	f	other	1	30	1	4	0	53	0
18934	Operations	region_2	Master's & above	m	sourcing	1	54	3	16	0	59	0
11448	Sales & Marketing	region_7	Master's & above	m	other	1	54	1	28	0	53	0
34560	Sales & Marketing	region_7	Bachelor's	m	other	1	49	2	6	0	49	0
38722	Procurement	region_17	Bachelor's	f	sourcing	1	32	3	6	0	72	0
62360	Sales & Marketing	region_2	Bachelor's	m	other	1	31	3	4	0	48	0
18756	Operations	region_16	Bachelor's	f	other	1	38	3	7	0	58	0
26069	Finance	region_13	Master's & above	m	sourcing	1	35	3	4	0	62	0
47143	HR	region_22	Bachelor's	m	sourcing	1	29	4	2	0	46	0
67392	Sales & Marketing	region_16	Bachelor's	m	other	1	38	4	3	0	49	0
74122	HR	region_7	Below Secondary	f	sourcing	1	24	3	2	0	49	0
22474	Sales & Marketing	region_7	Bachelor's	m	other	1	33	4	7	0	49	0
33939	Sales & Marketing	region_22	Bachelor's	f	other	1	29		1	0	55	0
37118	Sales & Marketing	region_15	Bachelor's	m	sourcing	1	25		1	0	48	0
45147	Operations	region_22	Master's & above	m	other	1	40	4	6	0	59	0
22271	Sales & Marketing	region_2	Bachelor's	f	sourcing	1	28		1	0	52	0
19283	Sales & Marketing	region_12	Bachelor's	f	other	1	28	2	2	0	44	0
66104	Technology	region_22	Master's & above	m	sourcing	1	32	1	7	0	79	0
22126	Operations	region_25	Bachelor's	f	other	1	28	4	2	0	58	0
53335	Procurement	region_15	Master's & above	m	other	1	40	4	9	0	72	1
6987	Procurement	region_17	Master's & above	f	other	1	34	3	7	0	74	0
51258	Procurement	region_2	Bachelor's	f	sourcing	1	29	3	2	0	71	0
54424	Operations	region_7	Below Secondary	m	other	1	26	4	2	0	62	0
49300	Sales & Marketing	region_3	Bachelor's	m	other	1	34	5	5	0	52	0
2742	Technology	region_28	Master's & above	m	other	1	35	2	8	0	78	1
473	Analytics	region_9	Bachelor's	m	sourcing	1	28	3	2	0	88	0
328	Sales & Marketing	region_7		m	other	1	27	5	2	0	51	0
49195	Legal	region_2	Master's & above	m	other	1	42	1	4	0	54	0
61288	Procurement	region_7	Bachelor's	m	sourcing	1	56	3	17	0	73	0
2361	Sales & Marketing	region_15	Bachelor's	m	sourcing	1	40	4	8	0	49	0
74881	Operations	region_21	Master's & above	m	sourcing	1	48	5	7	0	62	0
13112	Operations	region_26	Bachelor's	m	sourcing	1	24		1	0	59	0
16999	Sales & Marketing	region_15		m	other	1	26	1	5	0	50	0
52141	Technology	region_26	Bachelor's	m	other	1	34	4	5	0	84	0
73748	Sales & Marketing	region_32	Bachelor's	m	sourcing	1	31	5	2	0	44	0
2985	Analytics	region_22	Bachelor's	f	sourcing	1	26	5	4	0	86	1
10324	Sales & Marketing	region_2		m	sourcing	1	50	4	19	0	50	0
12161	Sales & Marketing	region_11	Bachelor's	m	other	1	34	3	5	0	48	0
33918	Sales & Marketing	region_30	Bachelor's	m	sourcing	1	40	5	12	0	51	0
69362	Operations	region_22	Below Secondary	f	other	1	26	4	2	0	58	0
58150	Procurement	region_5	Bachelor's	m	sourcing	1	32	2	6	0	72	0
74341	Procurement	region_8	Master's & above	f	sourcing	1	39	3	2	0	69	0
67891	Sales & Marketing	region_2		m	sourcing	1	23	5	2	0	64	1
67972	Sales & Marketing	region_28	Bachelor's	f	other	1	32	4	8	0	48	0
53371	Sales & Marketing	region_7	Bachelor's	m	other	1	39	5	10	0	53	0
35301	Legal	region_22	Below Secondary	m	other	1	24	5	1	0	58	0
8450	Sales & Marketing	region_4	Master's & above	m	sourcing	1	46	1	20	0	47	0
40259	Analytics	region_7	Bachelor's	m	other	1	29	4	1	0	84	0
61764	Sales & Marketing	region_7	Bachelor's	m	other	1	25		1	0	47	0
63252	Procurement	region_2	Below Secondary	f	sourcing	1	22	3	2	0	72	0
51271	R&D	region_22		m	other	1	29	5	2	0	83	1
74107	Operations	region_22	Bachelor's	m	sourcing	1	36	5	10	0	64	0
8843	Technology	region_31	Bachelor's	f	sourcing	1	30	3	11	0	79	0
18804	Analytics	region_2	Master's & above	m	other	1	40	3	4	0	84	0
20466	Technology	region_22	Master's & above	m	sourcing	1	31	4	3	0	72	0
68405	Operations	region_11	Master's & above	m	other	1	41	3	5	0	63	1
21994	HR	region_22	Master's & above	m	sourcing	1	52	3	17	0	49	0
48958	Sales & Marketing	region_13		m	other	1	29		1	0	47	0
52474	Sales & Marketing	region_21	Bachelor's	m	other	1	20	5	2	0	51	0
35767	Finance	region_2	Bachelor's	f	other	1	50	1	21	0		0
65791	Sales & Marketing	region_20	Master's & above	m	sourcing	1	38	1	6	0	48	0
7244	Sales & Marketing	region_32		m	sourcing	1	28	2	9	0	51	0
47449	Sales & Marketing	region_26	Bachelor's	m	other	1	29	1	2	0	46	0
56674	Procurement	region_23	Master's & above	f	sourcing	1	34	5	7	0	86	1
42900	Procurement	region_2	Bachelor's	f	sourcing	1	31	2	7	0	75	0
27248	Procurement	region_13	Bachelor's	m	sourcing	1	32	4	3	0	65	0
62285	Procurement	region_2	Master's & above	f	sourcing	1	49	5	20	0	78	0
73316	R&D	region_22	Master's & above	m	sourcing	1	29	3	3	0	86	0
38082	Operations	region_19	Bachelor's	m	sourcing	1	32	4	4	0	57	0
9888	Sales & Marketing	region_7	Master's & above	f	sourcing	1	37	1	4	0	47	0
45820	Sales & Marketing	region_2	Bachelor's	f	other	1	31	1	5	0	48	0
20377	HR	region_29	Bachelor's	m	other	1	28	3	4	0	46	0
77164	Procurement	region_30	Bachelor's	m	sourcing	1	37	5	4	0	72	0
35314	Procurement	region_15	Bachelor's	m	other	1	35	3	9	0	69	0
53927	Sales & Marketing	region_3	Master's & above	m	other	1	44	1	4	0	46	0
39023	Procurement	region_2	Master's & above	m	other	1	49	3	4	0	67	0
76103	Sales & Marketing	region_3	Master's & above	m	sourcing	1	37	4	10	0	92	1
54156	Operations	region_34	Master's & above	m	other	1	34	2	8	0	64	0
62716	HR	region_22	Bachelor's	m	other	1	36	4	11	0	50	0
12178	Sales & Marketing	region_6	Bachelor's	m	sourcing	1	35	3	7	0	49	0
11430	Sales & Marketing	region_8	Bachelor's	m	other	1	40		1	0	50	0
44116	HR	region_13	Bachelor's	m	other	1	29	4	2	0	50	0
36413	Sales & Marketing	region_28	Master's & above	m	other	1	43	3	11	0	55	1
23379	Operations	region_11	Bachelor's	m	other	1	38	5	10	0	62	0
58815	Sales & Marketing	region_2	Bachelor's	m	other	1	24		1	0	51	0
10914	Sales & Marketing	region_12	Bachelor's	m	other	1	27	5	6	0	48	0
36919	Sales & Marketing	region_7	Bachelor's	m	other	1	54	4	16	0	49	0
73975	Operations	region_26	Bachelor's	m	sourcing	1	37	3	10	0	58	0
65439	Legal	region_27	Bachelor's	f	other	1	27	5	2	0	58	0
57888	Procurement	region_5	Bachelor's	f	sourcing	1	32	5	8	0	69	0
75959	Procurement	region_2	Bachelor's	m	sourcing	1	43	3	7	0	68	0
52208	R&D	region_30	Bachelor's	m	sourcing	1	32	4	4	0	84	0
62355	Technology	region_33	Master's & above	m	sourcing	1	57	4	18	1	78	0
36087	Procurement	region_8	Master's & above	f	other	1	33	4	7	0	72	0
39208	Operations	region_2	Below Secondary	f	sourcing	1	24		1	0	54	0
24341	Sales & Marketing	region_11	Master's & above	m	other	1	30	4	4	0	52	0
62507	Finance	region_2	Bachelor's	m	other	1	23		1	0	63	0
34635	Sales & Marketing	region_3	Master's & above	m	sourcing	1	36	5	4	0	50	0
60175	Analytics	region_22	Bachelor's	m	other	1	28	5	8	0	87	1
46407	Procurement	region_15	Bachelor's	f	other	1	30	1	5	0	74	0
47744	R&D	region_26	Bachelor's	m	sourcing	1	30	3	5	0	83	0
62452	Operations	region_31	Bachelor's	m	other	1	31	1	5	0	59	0
18076	Operations	region_32	Bachelor's	m	sourcing	1	31	4	5	0	60	0
10984	Operations	region_2	Master's & above	f	other	1	47	3	18	0	59	0
77525	Sales & Marketing	region_25	Bachelor's	m	other	1	32	5	6	0	51	0
4307	HR	region_7	Master's & above	m	other	1	33	2	5	0	51	0
25301	Operations	region_26	Bachelor's	m	other	1	26	3	1	0	59	0
58401	Operations	region_2	Bachelor's	m	other	1	55	3	11	0	64	0
58436	Technology	region_11	Bachelor's	f	other	1	32	3	6	0	79	0
36658	Sales & Marketing	region_22	Bachelor's	m	other	1	28	2	3	0	54	0
9546	Analytics	region_1	Master's & above	m	sourcing	1	30	3	4	0	88	0
22751	Sales & Marketing	region_7	Bachelor's	m	other	1	30	5	3	0	51	0
21694	Sales & Marketing	region_6	Bachelor's	m	sourcing	1	25	3	2	0	50	0
21625	Sales & Marketing	region_2		m	referred	1	24	5	3	0	56	0
12938	Analytics	region_6	Bachelor's	m	other	1	32	5	6	0	81	0
39727	Technology	region_2	Master's & above	m	sourcing	1	51	3	3	0	84	0
74673	Analytics	region_2	Bachelor's	f	other	1	35	4	10	0	86	0
41173	Operations	region_11	Bachelor's	f	sourcing	1	31	3	3	0	58	0
11662	HR	region_2	Master's & above	m	other	1	50	4	10	0	50	0
55021	Sales & Marketing	region_2	Bachelor's	m	sourcing	1	57	1	15	0	47	0
21232	Sales & Marketing	region_28	Master's & above	f	other	1	30	3	3	0	53	0
5816	Procurement	region_15	Master's & above	m	other	1	32	3	2	0	65	0
39583	Technology	region_2	Bachelor's	f	sourcing	1	52	4	11	0	82	0
75421	Sales & Marketing	region_24	Bachelor's	m	other	1	28		1	0	52	0
21465	Operations	region_7	Master's & above	m	other	1	35	5	9	0	60	0
72275	Finance	region_31	Bachelor's	m	sourcing	1	41	4	11	0	59	0
73156	Sales & Marketing	region_25	Bachelor's	m	other	1	38	3	4	0	49	0
32527	Analytics	region_28	Master's & above	m	sourcing	1	41	3	4	0	85	0
42266	Operations	region_12	Bachelor's	f	sourcing	1	30	3	6	0	57	0
31025	Sales & Marketing	region_9	Master's & above	m	other	1	28	2	4	0	49	0
46907	Sales & Marketing	region_19	Bachelor's	m	sourcing	1	31	1	3	0	54	0
55226	Procurement	region_2	Master's & above	f	sourcing	1	38	5	7	0	72	1
50067	Sales & Marketing	region_26	Master's & above	m	other	1	32	1	4	0	51	0
34734	HR	region_23	Bachelor's	m	sourcing	1	35	5	10	0	49	0
23655	HR	region_23	Master's & above	m	other	1	32	3	6	0	46	0
37557	Sales & Marketing	region_2		m	sourcing	1	47	2	12	0	48	0
37381	Sales & Marketing	region_6	Bachelor's	f	sourcing	1	44	1	12	0	49	0
14924	Operations	region_12	Bachelor's	m	other	1	37	3	3	0		0
47478	Sales & Marketing	region_15		m	sourcing	1	40	1	15	0	47	0
69843	Sales & Marketing	region_28	Bachelor's	f	sourcing	1	34	3	2	0	53	0
19633	Procurement	region_27	Bachelor's	f	sourcing	1	30	3	8	0	75	0
29153	Operations	region_8	Master's & above	m	sourcing	1	40	4	3	0	57	0
6109	Operations	region_7	Bachelor's	m	other	1	30	3	2	0	60	0
63506	Procurement	region_16	Bachelor's	f	other	1	30	5	5	0	67	0
17112	Sales & Marketing	region_25		m	sourcing	1	35	2	7	0	52	0
76552	Operations	region_2	Master's & above	m	sourcing	1	59	3	7	0	59	0
35985	Technology	region_16	Bachelor's	f	other	1	29	1	3	0	81	0
76055	Analytics	region_34	Bachelor's	m	other	1	28	2	7	0	85	0
46039	Legal	region_22	Bachelor's	m	sourcing	1	30	5	2	0	56	0
36183	Sales & Marketing	region_15	Bachelor's	m	sourcing	1	36	2	3	0	51	0
61552	Technology	region_7	Bachelor's	m	other	1	34	3	10	0	74	0
16021	Finance	region_4	Bachelor's	m	sourcing	1	26	1	3	0		0
45988	R&D	region_2	Master's & above	m	sourcing	1	41	3	13	0	85	1
67969	Operations	region_25	Bachelor's	f	other	1	33	3	9	0	60	0
42591	Sales & Marketing	region_27	Bachelor's	m	sourcing	1	34	5	9	0	53	0
15598	Technology	region_19	Bachelor's	m	other	1	36	4	8	0	76	0
77485	Analytics	region_7	Bachelor's	m	other	1	27	5	3	0	85	0
64315	Procurement	region_2	Master's & above	f	referred	1	38	4	3	0	68	0
2275	Operations	region_23	Bachelor's	m	other	1	33	5	9	0	58	0
22947	Operations	region_22	Bachelor's	f	other	1	32	3	3	0	62	0
68152	Procurement	region_2	Master's & above	m	sourcing	1	57	3	10	0	69	0
43633	Procurement	region_2	Bachelor's	m	other	1	26		1	0	69	0
65857	Technology	region_2	Master's & above	f	referred	1	60	3	5	0	78	0
10186	Sales & Marketing	region_26	Bachelor's	m	other	1	25	5	2	0	50	0
70188	R&D	region_2	Master's & above	m	other	1	36	4	9	0	81	0
25403	Legal	region_7	Master's & above	m	other	1	36	1	7	0	55	0
45325	Technology	region_26	Bachelor's	f	other	1	26	3	3	0	80	0
48706	Operations	region_24	Bachelor's	m	sourcing	1	29	1	2	0	62	0
63793	Sales & Marketing	region_8	Bachelor's	m	sourcing	1	39	3	11	0	54	0
46056	Sales & Marketing	region_13	Bachelor's	m	sourcing	1	38	5	4	0	50	0
11833	Sales & Marketing	region_2	Bachelor's	f	sourcing	1	38	4	6	0	50	0
9217	Technology	region_27	Master's & above	f	other	1	33	3	7	0	78	0
47435	Sales & Marketing	region_17	Bachelor's	m	sourcing	1	30	5	2	0	50	0
50091	Sales & Marketing	region_26	Bachelor's	m	sourcing	1	29	5	2	0	50	0
50439	Operations	region_29	Bachelor's	f	sourcing	1	29	3	7	0	59	0
31379	Procurement	region_8	Master's & above	f	other	1	32	2	9	0	88	1
40824	Technology	region_23	Master's & above	m	other	1	43	3	10	0	81	0
35612	Sales & Marketing	region_7	Master's & above	f	other	1	41	3	13	0	49	0
7456	Sales & Marketing	region_1		m	other	1	28		1	0	48	0
49934	Sales & Marketing	region_25		m	other	1	30	3	5	0	49	0
54784	Sales & Marketing	region_16	Bachelor's	m	sourcing	1	36	4	10	0	50	0
72247	Procurement	region_15	Bachelor's	f	sourcing	1	30	3	8	0	69	0
20036	Procurement	region_15	Bachelor's	f	other	1	30	3	5	0	85	1
52624	Operations	region_22	Bachelor's	f	other	1	36	4	4	0	59	0
6774	Sales & Marketing	region_13	Master's & above	m	sourcing	1	31	5	6	0	48	0
34331	Operations	region_12	Bachelor's	f	other	1	27		1	0	50	0
51692	Sales & Marketing	region_13	Master's & above	f	sourcing	1	41	1	9	0	54	0
64222	Procurement	region_2	Master's & above	f	other	1	43	3	6	0	72	0
31649	Sales & Marketing	region_26		m	other	1	26	1	3	0	55	0
56666	R&D	region_22	Bachelor's	m	sourcing	1	30	4	7	0	88	0
24721	Operations	region_2	Master's & above	m	sourcing	1	34	3	7	0	58	0
44783	Finance	region_2	Master's & above	m	sourcing	1	32	3	3	0	60	0
6490	Sales & Marketing	region_2	Bachelor's	m	other	1	44	5	5	0	46	0
59796	Operations	region_29	Master's & above	m	sourcing	1	35	2	7	0	53	0
57377	Operations	region_2	Master's & above	f	other	1	60	1	17	0	62	0
22125	Procurement	region_22	Bachelor's	f	sourcing	1	34	5	8	0	71	0
44338	Operations	region_7	Bachelor's	m	sourcing	1	36	4	10	0	59	0
77852	Technology	region_22	Bachelor's	m	sourcing	1	28	4	6	0	82	0
16164	Operations	region_24	Bachelor's	f	other	1	29	4	3	0	59	0
3854	Procurement	region_16	Master's & above	f	other	1	35	3	9	0	70	1
61283	Analytics	region_32	Bachelor's	m	sourcing	1	27		1	0	85	0
61197	HR	region_2	Bachelor's	m	sourcing	1	26	3	2	0	46	0
21024	Analytics	region_32	Bachelor's	m	other	1	33	3	7	0	84	0
33483	Operations	region_14	Master's & above	f	other	1	37	3	9	0	56	0
63115	HR	region_4	Master's & above	f	other	1	33	5	3	0	65	1
58492	Sales & Marketing	region_25	Master's & above	m	sourcing	1	35	5	3	0	48	0
59965	Procurement	region_2	Master's & above	f	sourcing	1	35	1	4	0	74	0
32197	Sales & Marketing	region_30	Bachelor's	f	sourcing	1	31	3	3	0	55	0
14085	Sales & Marketing	region_16		m	sourcing	1	22		1	0		1
19121	Technology	region_5	Bachelor's	m	other	1	41	5	3	0	75	0
5503	Operations	region_27	Master's & above	f	other	1	37	5	4	0		0
1850	Sales & Marketing	region_15	Bachelor's	m	sourcing	1	33	5	3	0	53	0
48064	Sales & Marketing	region_7	Bachelor's	f	sourcing	1	35	3	8	0	47	0
24103	Technology	region_2	Bachelor's	m	other	1	24	4	2	0	75	0
24521	R&D	region_22	Bachelor's	m	other	1	27	4	3	0	88	0
20350	Sales & Marketing	region_31	Bachelor's	m	sourcing	1	29	3	4	0	52	0
30181	Operations	region_31	Bachelor's	m	other	1	25		1	0	58	0
34514	Procurement	region_8	Master's & above	m	sourcing	1	39	1	3	0	72	0
64503	Sales & Marketing	region_22	Master's & above	m	other	1	33	1	5	0	49	0
71299	Sales & Marketing	region_26	Master's & above	m	other	1	41	3	6	0	48	0
75960	Sales & Marketing	region_2	Bachelor's	f	other	1	37	5	4	0	48	0
2823	Analytics	region_2	Bachelor's	m	other	1	60	3	28	0	80	0
48898	Procurement	region_2	Bachelor's	f	other	1	34	3	6	0	83	1
75605	Procurement	region_34	Bachelor's	m	sourcing	1	27	3	3	0	69	0
40339	Sales & Marketing	region_7	Master's & above	m	other	1	54	4	14	0	48	1
28748	Operations	region_13	Bachelor's	f	other	1	30	4	5	0	60	0
30570	Sales & Marketing	region_22	Bachelor's	f	sourcing	1	29	3	2	0	49	0
69028	Technology	region_11	Bachelor's	f	other	1	30	3	4	0	81	0
57968	Sales & Marketing	region_33	Master's & above	m	sourcing	1	40	3	6	0	52	0
5322	Finance	region_2	Master's & above	m	other	1	44	5	8	0	63	0
37934	Operations	region_22	Master's & above	f	other	1	42	5	4	0	52	0
59931	Sales & Marketing	region_2	Master's & above	m	other	1	35	5	8	0	48	1
60456	R&D	region_22	Bachelor's	f	sourcing	1	27	1	4	0	84	0
46215	Technology	region_24	Bachelor's	m	other	1	32	3	6	0	80	0
51966	Operations	region_2	Bachelor's	f	other	1	46	3	7	0	59	0
20063	Technology	region_16	Bachelor's	m	sourcing	1	28	3	3	0	76	0
49141	Analytics	region_26	Bachelor's	m	other	1	28		1	0	86	0
74207	Analytics	region_2	Master's & above	m	other	1	54	3	5	0	86	0
17594	Analytics	region_13	Bachelor's	m	other	1	34	3	7	0	84	0
63389	Legal	region_22	Bachelor's	m	other	1	31		1	0	57	0
47726	Technology	region_2	Bachelor's	m	other	1	38	4	9	0	80	0
27579	Operations	region_22	Master's & above	m	other	1	58	4	31	0	62	0
52051	Procurement	region_11	Master's & above	m	sourcing	1	35	4	3	0	69	0
67122	Sales & Marketing	region_2		f	other	1	43	5	11	0	46	1
15903	Operations	region_23	Master's & above	f	other	1	32	4	4	0		0
73906	Sales & Marketing	region_21	Bachelor's	m	sourcing	1	29	3	3	0	52	0
21601	Operations	region_31	Bachelor's	m	other	1	28	5	4	0	64	0
57979	Technology	region_4	Bachelor's	m	sourcing	1	28	3	5	0	82	0
20258	Analytics	region_29		m	sourcing	1	28	5	2	0	83	0
18253	Sales & Marketing	region_1	Bachelor's	f	other	1	28	2	6	0	52	0
53073	Technology	region_2	Bachelor's	m	sourcing	1	33	3	7	0	80	0
48862	Procurement	region_17	Bachelor's	f	other	1	40	4	6	0	66	0
17650	Technology	region_2	Bachelor's	f	other	1	55	3	8	0	79	0
44770	Sales & Marketing	region_30	Bachelor's	m	sourcing	1	30	3	4	0	48	0
76402	Operations	region_7	Master's & above	f	other	1	44	2	13	0	62	0
24636	Procurement	region_11	Bachelor's	f	other	1	32	1	7	0	70	0
60478	Operations	region_4	Bachelor's	m	other	1	44	4	14	0	57	0
42532	Sales & Marketing	region_15	Bachelor's	m	other	1	51	1	22	0	50	0
7148	Finance	region_22	Bachelor's	f	other	1	30	3	4	0	58	0
10219	Operations	region_25	Bachelor's	f	sourcing	1	29	4	2	0		0
46889	Procurement	region_22	Bachelor's	f	other	1	27	3	4	0	67	0
38825	Operations	region_22	Bachelor's	f	other	1	27	5	4	0	77	1
34143	Sales & Marketing	region_7		m	sourcing	1	22		1	0	49	0
68114	Operations	region_22	Bachelor's	f	sourcing	1	37	5	11	0	62	1
42884	Sales & Marketing	region_8	Bachelor's	m	sourcing	1	40	3	4	0	50	0
49996	Technology	region_16	Bachelor's	f	referred	1	26	4	3	0	80	0
54099	Analytics	region_22	Bachelor's	m	sourcing	1	25	4	2	0	81	0
55019	Technology	region_16	Bachelor's	f	other	1	59	3	14	0	76	0
3919	Operations	region_22	Master's & above	m	sourcing	1	32	4	3	0	60	0
47551	Operations	region_16	Bachelor's	f	other	1	25	4	2	0		0
55909	Sales & Marketing	region_1	Master's & above	m	other	1	39	3	3	0		1
60698	Operations	region_15	Bachelor's	f	other	1	43	5	12	0	62	0
36171	Operations	region_13	Bachelor's	f	other	1	31	5	2	0	57	0
7454	Sales & Marketing	region_2	Master's & above	f	other	1	55	3	10	0	53	0
5510	Operations	region_15		m	sourcing	1	34	5	8	0		0
53912	Technology	region_7	Bachelor's	f	other	1	39	4	13	0	82	0
8769	HR	region_2	Bachelor's	f	referred	1	37	4	3	0	52	0
55936	Sales & Marketing	region_2	Master's & above	m	sourcing	1	35	2	7	0	48	0
34	Operations	region_14	Bachelor's	m	other	1	43	3	13	0		0
36078	Technology	region_13	Master's & above	f	sourcing	1	60	3	34	0	84	0
40133	Sales & Marketing	region_4	Master's & above	m	sourcing	1	45	3	7	0	49	0
59384	Operations	region_15	Bachelor's	m	sourcing	1	32	3	7	0		0
47973	Sales & Marketing	region_2	Bachelor's	m	referred	1	38	5	7	0	49	0
36318	Sales & Marketing	region_22	Master's & above	m	other	1	36	5	9	0	46	0
33414	Sales & Marketing	region_22	Bachelor's	m	other	1	30	5	6	0	54	1
6752	Sales & Marketing	region_16	Bachelor's	m	sourcing	1	43	3	13	0	51	0
48990	Finance	region_27	Bachelor's	f	sourcing	1	26	3	3	0	57	0
66816	Technology	region_2	Bachelor's	f	sourcing	1	29	5	3	0	83	0
60101	Procurement	region_22	Bachelor's	f	other	1	27	3	6	0	68	0
49484	Operations	region_22	Master's & above	f	sourcing	1	36	4	9	0		0
53652	Sales & Marketing	region_2	Bachelor's	m	other	1	30	4	3	0	46	0
45874	Procurement	region_17	Master's & above	m	other	1	46	3	6	0	68	0
61807	Procurement	region_2	Master's & above	m	other	1	49	4	17	0	69	0
4990	Sales & Marketing	region_22	Bachelor's	m	sourcing	1	23	3	3	0	46	0
37617	Sales & Marketing	region_23		m	other	1	39	5	13	0	52	0
68833	HR	region_2	Below Secondary	f	sourcing	1	26	1	2	0	47	0
15531	Operations	region_13	Bachelor's	f	sourcing	1	35	3	9	0	59	0
76997	Legal	region_2	Bachelor's	m	other	1	44	3	10	0	58	0
3414	Operations	region_29	Master's & above	m	other	1	46	3	16	0	57	0
61908	HR	region_2	Master's & above	m	referred	1	36	3	6	0	50	0
56521	Technology	region_31	Bachelor's	m	other	1	26		1	0	78	0
27993	HR	region_22	Bachelor's	m	other	1	28		1	0	47	0
60027	Operations	region_2	Master's & above	f	other	1	48	3	5	0	59	0
66882	HR	region_22	Master's & above	f	other	1	29	3	6	0	50	0
58954	Legal	region_16	Bachelor's	m	other	1	33	1	3	0	60	0
73613	Analytics	region_15	Bachelor's	m	other	1	28	5	3	0	85	0
500	Sales & Marketing	region_2		m	sourcing	1	20		1	0	53	0
23343	Sales & Marketing	region_4	Bachelor's	m	other	1	46	5	12	0	50	0
67678	Sales & Marketing	region_15	Bachelor's	m	sourcing	1	34	3	7	0	50	0
28801	Sales & Marketing	region_15		m	sourcing	1	29	1	2	0	49	0
10163	Procurement	region_2	Master's & above	f	sourcing	1	48	3	9	0	64	0
53745	Legal	region_27	Bachelor's	m	sourcing	1	31	3	4	0	63	0
9345	Sales & Marketing	region_10	Bachelor's	m	other	1	25	1	2	0	48	0
35649	Procurement	region_5	Bachelor's	m	sourcing	1	33	2	8	0	66	0
43233	Sales & Marketing	region_2	Bachelor's	m	referred	1	32	5	7	0	49	0
66140	Procurement	region_2	Bachelor's	f	sourcing	1	28	3	2	0	66	0
56118	Sales & Marketing	region_17	Bachelor's	m	other	1	33	1	7	0	46	0
74340	Procurement	region_27	Bachelor's	f	other	1	33	4	4	0	70	0
40229	Procurement	region_7	Below Secondary	f	sourcing	1	25		1	0	71	0
73386	Procurement	region_15	Master's & above	m	other	1	39	2	4	1	74	1
16305	Sales & Marketing	region_5	Master's & above	m	other	1	43	2	12	0	48	0
8238	Legal	region_5	Bachelor's	m	other	1	32	5	4	0	59	0
34479	Operations	region_29	Bachelor's	m	other	1	42	2	2	0	57	0
49655	Technology	region_2	Bachelor's	m	sourcing	1	47	3	3	0	77	0
35817	Sales & Marketing	region_2	Bachelor's	m	other	1	44	4	16	0	48	0
49214	Procurement	region_2	Bachelor's	f	sourcing	1	29		1	0	71	0
52390	Sales & Marketing	region_7	Master's & above	f	other	1	33	5	8	0	46	0
4138	Technology	region_27	Bachelor's	m	other	1	39	4	10	0	78	0
67502	R&D	region_2	Master's & above	m	sourcing	1	44	3	5	0	83	0
33066	Technology	region_1	Bachelor's	f	other	1	29		1	0	79	0
32887	Operations	region_29	Bachelor's	m	other	1	28	2	2	0	58	0
57359	HR	region_28	Bachelor's	m	sourcing	1	31	4	4	0	47	0
6171	Procurement	region_22	Bachelor's	m	other	1	32	5	4	1	99	1
46239	Sales & Marketing	region_32	Bachelor's	m	other	1	31	5	4	0		0
77517	Technology	region_2	Master's & above	m	sourcing	1	57	3	6	0	76	0
64549	Operations	region_29	Master's & above	m	sourcing	1	31	3	5	0	60	0
16421	Operations	region_15	Bachelor's	m	other	1	35	4	7	0	56	0
13250	Technology	region_23	Bachelor's	m	other	1	31	1	5	0	81	0
9443	Operations	region_2	Bachelor's	m	sourcing	1	49	1	7	0		0
40834	Operations	region_2	Bachelor's	f	other	1	35	3	3	0	59	0
34365	Operations	region_22	Bachelor's	f	sourcing	1	31	2	6	0		0
59412	Sales & Marketing	region_7	Bachelor's	m	other	1	32	5	4	0	51	0
15825	Operations	region_14	Bachelor's	m	sourcing	1	34	4	7	0	60	0
13648	HR	region_2	Bachelor's	m	other	1	29	4	3	0	50	0
1359	Technology	region_11	Master's & above	m	other	1	34	3	9	0	81	0
56588	Sales & Marketing	region_33	Bachelor's	m	sourcing	1	36	2	7	0	43	0
16087	Operations	region_21	Bachelor's	m	other	1	34	3	6	0	55	1
34585	Operations	region_26	Master's & above	m	sourcing	1	44	3	6	0	56	0
41402	Operations	region_15	Master's & above	f	sourcing	1	32	4	9	0	60	0
21335	Technology	region_13	Master's & above	m	other	1	36	3	7	0	87	1
63129	Finance	region_2	Master's & above	m	sourcing	1	35	3	2	0	58	0
61562	Sales & Marketing	region_22	Bachelor's	m	referred	1	32	3	7	0	48	0
61876	HR	region_31	Bachelor's	f	other	1	33	5	5	0	50	0
53794	Operations	region_22	Master's & above	m	sourcing	1	38	5	8	0	56	0
19603	Sales & Marketing	region_7	Master's & above	f	other	1	34	4	6	0	47	0
6952	Sales & Marketing	region_2	Bachelor's	m	sourcing	1	28	5	4	0	51	0
15967	Sales & Marketing	region_16	Bachelor's	f	other	1	38	3	2	0	52	0
75235	Sales & Marketing	region_29	Bachelor's	m	other	1	35	3	10	0	50	1
10817	Procurement	region_2	Master's & above	f	other	1	36	4	4	0	72	0
53030	Technology	region_7	Bachelor's	m	other	1	27	2	2	0	80	0
31286	Sales & Marketing	region_7	Bachelor's	f	other	1	24		1	0	47	1
27841	Sales & Marketing	region_26	Bachelor's	m	other	1	26		1	0	53	0
7245	Sales & Marketing	region_16	Bachelor's	m	sourcing	1	46	3	6	0	47	0
71305	Sales & Marketing	region_2	Master's & above	m	other	1	55	3	15	0	48	0
30828	Finance	region_28	Bachelor's	m	sourcing	1	31	5	5	0	55	1
8257	Sales & Marketing	region_28	Bachelor's	m	other	1	30	3	5	0	50	0
60075	Sales & Marketing	region_22	Master's & above	m	other	1	40	5	8	0	48	0
63299	Procurement	region_8	Bachelor's	f	other	1	31	3	3	0	68	0
53804	Operations	region_4	Bachelor's	m	other	1	31	5	7	0	57	0
57580	Analytics	region_8	Bachelor's	m	sourcing	1	30	3	6	0	88	0
66589	Technology	region_1	Bachelor's	f	other	1	28	2	5	0	80	0
71187	Procurement	region_22	Master's & above	f	sourcing	1	33	5	7	0	68	1
60499	Operations	region_23	Bachelor's	m	sourcing	1	37	4	9	0		0
21304	Technology	region_27	Master's & above	m	other	1	40	5	14	1	85	1
13319	Operations	region_12	Bachelor's	m	other	1	27	5	2	0	56	0
5912	HR	region_2	Bachelor's	f	other	1	55	3	21	0	49	0
11653	Analytics	region_27	Bachelor's	m	sourcing	1	29	4	1	0	81	1
40594	R&D	region_7	Bachelor's	m	sourcing	1	37	1	3	0	83	0
17781	Sales & Marketing	region_31		m	other	1	23		1	0	47	1
756	Sales & Marketing	region_13	Bachelor's	f	sourcing	1	33	5	7	0	50	0
35780	Operations	region_26	Master's & above	f	other	1	41	5	9	0		0
53761	Legal	region_2	Below Secondary	m	sourcing	1	28	4	2	0	63	0
68499	Operations	region_7		m	sourcing	1	35	4	2	1	71	1
35993	Finance	region_29	Bachelor's	m	other	1	28	3	3	0	64	0
10985	Procurement	region_19	Bachelor's	f	other	1	37	1	7	0	70	0
54972	Technology	region_2	Master's & above	m	other	1	60	3	17	0	80	0
57606	Operations	region_19	Bachelor's	f	other	1	37	5	10	0	65	0
19582	HR	region_4	Master's & above	f	other	1	36	2	8	0	44	0
43342	Procurement	region_15	Bachelor's	m	sourcing	1	31	5	5	0	71	0
40472	Technology	region_13	Master's & above	f	other	1	32	4	7	0	97	1
50774	R&D	region_22	Bachelor's	m	sourcing	1	28		1	0	88	0
78106	Operations	region_15	Bachelor's	f	other	1	35	5	4	0	74	1
76312	Analytics	region_13	Bachelor's	m	other	1	26	4	4	0	83	0
30157	Technology	region_7	Master's & above	f	other	1	51	4	4	0	82	0
40994	Procurement	region_2	Master's & above	f	sourcing	1	45	4	4	0	73	0
23815	HR	region_2	Master's & above	m	other	1	46	3	9	0	48	0
20836	Procurement	region_7	Master's & above	f	sourcing	1	40	2	8	0	69	0
40524	Sales & Marketing	region_13	Bachelor's	m	other	1	38	3	7	0	50	0
5117	Sales & Marketing	region_13	Bachelor's	f	other	1	27		1	0	47	0
5927	Operations	region_6	Bachelor's	m	other	1	26	4	5	0	60	0
40051	Procurement	region_4	Master's & above	m	sourcing	1	31	1	7	0	71	0
27712	Analytics	region_19	Bachelor's	m	other	1	41	4	11	0	84	0
42345	Technology	region_28	Bachelor's	m	other	1	29		1	0	76	0
13605	Operations	region_2		m	other	1	25		1	0	58	0
18270	Operations	region_4	Bachelor's	m	other	1	56	3	16	0	59	0
11177	Technology	region_24	Bachelor's	f	other	1	28	4	2	0	84	0
20459	Technology	region_7	Bachelor's	m	other	1	29	3	4	0	75	0
11314	Operations	region_7	Bachelor's	f	other	1	42	1	5	0	62	0
18090	Analytics	region_2	Bachelor's	m	sourcing	1	38	4	8	0	87	0
9981	Technology	region_15	Bachelor's	m	other	1	33	3	8	0	82	0
63939	R&D	region_22	Master's & above	m	other	1	37	4	10	0	86	0
37460	Technology	region_6	Bachelor's	m	sourcing	1	33	4	6	0	83	0
10607	Analytics	region_8	Bachelor's	m	sourcing	1	27	5	5	0	87	1
49603	Sales & Marketing	region_22	Bachelor's	m	other	1	27		1	0	47	0
57795	Operations	region_22	Bachelor's	m	sourcing	1	57	3	12	0	58	0
19454	HR	region_7	Master's & above	f	sourcing	1	36	4	2	0	51	0
33300	Analytics	region_7	Bachelor's	m	other	1	34	5	9	0	84	0
33895	Technology	region_2	Master's & above	f	sourcing	1	45	1	18	0	76	0
68994	Sales & Marketing	region_26	Bachelor's	m	sourcing	1	25	5	2	0		0
70840	Technology	region_2	Bachelor's	f	sourcing	1	42	5	11	0	78	0
25965	Procurement	region_11	Bachelor's	f	other	1	31	5	2	0	71	1
36406	HR	region_7	Bachelor's	f	other	1	28	5	2	0	49	0
39398	Operations	region_15	Bachelor's	f	sourcing	1	31	4	5	0	59	0
895	Sales & Marketing	region_2	Master's & above	m	other	1	45	3	3	0	49	0
62581	Procurement	region_10	Master's & above	m	sourcing	1	32	5	3	0	73	0
69061	HR	region_2	Bachelor's	f	other	1	46	5	3	0	52	0
61944	Sales & Marketing	region_28	Bachelor's	f	other	1	32	5	7	1	48	0
72528	Sales & Marketing	region_32	Bachelor's	m	other	1	35	1	8	0	47	0
74217	Procurement	region_16	Bachelor's	m	other	1	32	3	6	0	69	0
40754	Sales & Marketing	region_15	Bachelor's	m	sourcing	1	29	3	4	0	50	0
37204	Procurement	region_7	Bachelor's	m	other	1	32	5	7	0	70	1
51124	Sales & Marketing	region_30	Bachelor's	m	other	1	29	2	6	0	51	0
28494	Sales & Marketing	region_8	Master's & above	m	other	1	30	5	6	0	51	0
66614	Sales & Marketing	region_5	Bachelor's	m	other	1	33	4	4	0	49	0
11399	Operations	region_13	Bachelor's	m	other	1	31	5	5	0	59	0
49527	Procurement	region_11	Bachelor's	m	sourcing	1	31	3	7	0	71	0
58555	Operations	region_2		f	sourcing	1	33	3	7	0		0
2227	Sales & Marketing	region_13	Bachelor's	m	sourcing	1	56	4	6	0	50	0
36913	Procurement	region_4	Master's & above	m	other	1	47	1	18	0	68	0
4646	Sales & Marketing	region_2	Bachelor's	m	other	1	37	3	8	0	59	1
60334	Sales & Marketing	region_1	Bachelor's	m	other	1	28	2	4	0	51	0
35168	Operations	region_22	Bachelor's	m	other	1	25		1	1	57	0
35674	Technology	region_2	Master's & above	m	other	1	33	2	8	0	83	0
31282	Operations	region_24	Bachelor's	m	other	1	33	4	6	0	62	0
47540	Technology	region_14	Bachelor's	f	other	1	35	1	4	0	77	0
17458	Operations	region_22	Bachelor's	m	other	1	29	5	3	0	59	0
49781	Operations	region_29	Bachelor's	m	other	1	39	1	8	0	64	0
39969	Sales & Marketing	region_20	Bachelor's	m	other	1	29	4	3	0	49	0
20343	Sales & Marketing	region_2	Master's & above	m	sourcing	1	37	3	7	0	59	1
14793	R&D	region_25	Master's & above	m	sourcing	1	35	5	8	0	86	0
36912	Legal	region_2	Bachelor's	m	sourcing	1	40	4	5	0	63	0
11089	Operations	region_11	Master's & above	m	other	1	45	5	14	0	56	0
19691	Operations	region_7	Bachelor's	f	sourcing	1	28		1	0	56	0
21431	Sales & Marketing	region_1	Master's & above	f	sourcing	1	32	4	5	0	49	0
49381	Technology	region_6	Bachelor's	f	other	1	26	1	4	0	79	0
70616	HR	region_2	Master's & above	f	other	1	50	5	5	0	53	0
75595	Sales & Marketing	region_7	Bachelor's	m	sourcing	1	27	3	3	0	48	0
61334	Procurement	region_7	Master's & above	m	other	1	50	4	5	0	73	0
36441	Procurement	region_26	Bachelor's	m	sourcing	1	38	3	4	0	71	0
34509	Procurement	region_15	Master's & above	m	sourcing	1	43	5	9	0	69	0
62493	HR	region_7	Bachelor's	m	sourcing	1	47	3	17	0	48	0
43938	Technology	region_6	Master's & above	f	sourcing	1	41	4	2	0	84	0
44453	Procurement	region_16	Bachelor's	m	other	1	33	3	7	0	72	0
61472	Sales & Marketing	region_20	Master's & above	m	other	1	39	3	4	0	48	0
27779	Procurement	region_7	Master's & above	m	other	1	50	4	14	0	67	0
43386	Sales & Marketing	region_22	Bachelor's	m	sourcing	1	29	1	5	0	49	0
75620	Operations	region_27	Bachelor's	f	other	1	31	3	5	0	58	0
12819	Legal	region_22	Bachelor's	m	referred	1	30	5	5	0	58	0
55180	Sales & Marketing	region_2	Master's & above	m	sourcing	1	41	3	6	0	52	0
32947	Sales & Marketing	region_2	Master's & above	m	other	1	50	3	7	0	46	0
58676	Sales & Marketing	region_30	Bachelor's	m	other	1	34	2	6	0		0
12042	Procurement	region_2	Below Secondary	m	sourcing	1	20		1	0	74	0
37861	HR	region_2	Bachelor's	m	sourcing	1	46	4	8	0	52	0
73375	Sales & Marketing	region_13	Bachelor's	m	other	1	31	5	3	0	57	0
34482	HR	region_28	Bachelor's	m	sourcing	1	32	5	7	0	44	0
5203	Sales & Marketing	region_2	Bachelor's	m	other	1	44	5	3	0	57	1
25101	Sales & Marketing	region_11		m	other	1	37	4	10	0	48	0
63409	Operations	region_2	Master's & above	m	sourcing	1	48	3	7	0	62	0
41771	Technology	region_2	Master's & above	f	other	1	42	2	2	0	79	0
58010	Technology	region_14	Master's & above	f	other	1	44	3	15	0	78	0
62954	Sales & Marketing	region_31	Bachelor's	m	other	1	31	3	6	0	50	0
23841	Procurement	region_2	Master's & above	f	sourcing	1	44	2	16	0	73	0
31360	Sales & Marketing	region_15	Master's & above	m	other	1	41	3	11	0	48	0
74407	Sales & Marketing	region_26		m	other	1	30	1	3	0	51	0
29511	HR	region_28	Bachelor's	m	other	1	34	3	7	0	48	0
40298	HR	region_22	Below Secondary	f	sourcing	1	23		1	0	53	0
8402	Procurement	region_2	Bachelor's	f	other	1	33	4	6	0	69	0
12806	Legal	region_7	Bachelor's	m	other	1	37	4	7	0	62	0
62881	Technology	region_11	Bachelor's	m	other	1	31	1	4	0	79	0
55331	Analytics	region_22		m	other	1	28	2	2	0	85	0
26882	Technology	region_9	Bachelor's	m	other	1	25	2	2	0	81	0
40761	Operations	region_13	Bachelor's	m	other	1	26	3	2	0	66	0
51555	Technology	region_16	Bachelor's	m	other	1	28		1	0	82	0
65817	Operations	region_31	Master's & above	f	sourcing	1	42	3	4	0	60	0
31672	Operations	region_6	Bachelor's	m	other	1	28	5	3	0	58	0
41666	HR	region_13	Master's & above	f	sourcing	1	44	5	9	0	49	0
32127	Sales & Marketing	region_22	Bachelor's	m	sourcing	1	26	5	5	0	93	1
75225	Technology	region_2	Master's & above	m	other	1	40	4	3	0	82	0
25477	Operations	region_2	Bachelor's	m	sourcing	1	30	3	3	0	64	0
48695	Sales & Marketing	region_1	Bachelor's	m	sourcing	1	29	5	5	0	52	0
14427	Sales & Marketing	region_2		f	other	1	23	4	2	0	52	0
1442	Procurement	region_22	Master's & above	f	other	1	41	5	7	0	68	0
28750	Operations	region_30	Master's & above	m	other	1	40	2	5	0	54	0
5237	Sales & Marketing	region_2	Bachelor's	f	sourcing	1	54	4	12	0	47	1
1028	Procurement	region_11	Bachelor's	m	other	1	32	3	5	0	72	0
23943	Technology	region_27	Master's & above	m	sourcing	1	58	2	14	0	87	0
13071	Procurement	region_7	Bachelor's	m	sourcing	1	31	5	3	0	74	0
56001	Sales & Marketing	region_21	Bachelor's	m	sourcing	1	30	4	2	0	51	0
52472	Procurement	region_2	Bachelor's	m	other	1	56	2	16	0	74	0
11838	Procurement	region_1	Bachelor's	m	other	1	27	3	2	0	71	0
21817	Operations	region_2	Bachelor's	f	other	1	30	4	6	1	59	1
68124	Sales & Marketing	region_13	Master's & above	m	sourcing	1	36	3	4	0	47	0
37627	Finance	region_2	Bachelor's	m	sourcing	1	50	4	7	0	54	0
59851	Sales & Marketing	region_11	Bachelor's	m	sourcing	1	25	5	2	0	49	0
5024	Sales & Marketing	region_26	Bachelor's	m	sourcing	1	35	3	7	0	55	0
68686	Sales & Marketing	region_7		m	other	1	31	5	7	0	48	0
49378	Analytics	region_16	Bachelor's	m	other	1	42	1	5	0	87	0
58416	Analytics	region_15	Bachelor's	m	sourcing	1	29	3	7	0	87	0
8168	Sales & Marketing	region_32	Bachelor's	m	other	1	25		1	0	53	0
40223	Operations	region_11	Bachelor's	m	sourcing	1	39	3	9	0	57	0
20784	Procurement	region_23	Bachelor's	m	other	1	35	3	8	0	71	0
40459	Analytics	region_27	Bachelor's	m	sourcing	1	33	5	3	0	92	1
18095	Technology	region_2	Bachelor's	f	other	1	43	3	2	0	78	0
34435	Analytics	region_22		f	sourcing	1	26	3	2	0	87	0
45227	Procurement	region_7	Master's & above	m	sourcing	1	49	3	8	0	75	0
40933	Operations	region_22	Master's & above	m	other	1	60	5	4	1	60	0
64196	Sales & Marketing	region_21	Bachelor's	m	other	1	24		1	0	56	0
49251	Sales & Marketing	region_13	Bachelor's	m	other	1	38	5	3	0	51	0
14743	Operations	region_7	Bachelor's	m	other	1	33	3	7	0		0
56157	Operations	region_10	Bachelor's	f	sourcing	1	37	3	7	0	60	0
8986	Procurement	region_13	Bachelor's	m	other	1	40	3	4	0	67	1
62660	Analytics	region_22	Bachelor's	m	other	1	28	3	2	0	88	1
71440	Sales & Marketing	region_7	Master's & above	m	other	1	39	4	15	0	49	0
62438	Analytics	region_22	Master's & above	m	sourcing	1	32	2	5	0	85	0
55508	Sales & Marketing	region_2	Bachelor's	m	other	1	30	5	6	0		0
52467	Technology	region_2	Bachelor's	m	other	1	39	4	7	0	80	0
6678	Sales & Marketing	region_15	Bachelor's	m	other	1	46	4	2	0	53	0
41544	Sales & Marketing	region_23	Bachelor's	m	other	1	39	3	9	0	51	0
77463	Procurement	region_30	Bachelor's	f	other	1	37	5	8	0	74	0
44905	Procurement	region_19	Bachelor's	m	sourcing	1	38	5	3	0	70	1
48212	Analytics	region_26		m	other	1	28		1	0	81	0
58717	Sales & Marketing	region_12	Master's & above	m	sourcing	1	41	1	3	0	50	0
6102	Analytics	region_1	Bachelor's	m	other	1	32	5	3	0	85	0
26372	Operations	region_2	Master's & above	m	other	1	50	2	18	0	60	0
16013	Technology	region_10	Bachelor's	f	other	1	29	4	4	0	82	1
55366	Operations	region_16	Master's & above	m	other	1	42	1	6	0	55	0
244	Operations	region_2	Bachelor's	m	sourcing	1	50	3	25	0		0
55815	Operations	region_3	Master's & above	f	other	1	39	5	10	0		0
17374	Legal	region_2	Master's & above	m	sourcing	1	39	1	6	0	56	0
16486	Sales & Marketing	region_32		m	sourcing	1	30	2	4	0	51	0
57158	Procurement	region_2	Bachelor's	f	other	1	35	3	3	1	69	0
41618	Analytics	region_25	Master's & above	m	sourcing	1	34	5	8	0	82	0
54158	Technology	region_26	Bachelor's	m	other	1	26	5	4	0	78	1
72723	Sales & Marketing	region_22	Bachelor's	f	other	1	27		1	0	49	0
1103	Sales & Marketing	region_11		m	other	1	30	4	7	0	50	0
21595	Analytics	region_22	Bachelor's	m	sourcing	1	29	4	4	0	80	1
31067	Sales & Marketing	region_4	Master's & above	m	other	1	40	5	12	0	47	0
40310	Procurement	region_7	Master's & above	f	sourcing	1	55	5	4	0	69	0
73213	Sales & Marketing	region_7	Bachelor's	m	sourcing	1	40	5	3	0	51	0
56017	Operations	region_2	Bachelor's	f	other	1	37	4	10	0	59	0
22835	Operations	region_2		f	other	1	41	4	3	0	63	0
2136	Operations	region_6	Bachelor's	f	sourcing	1	32	5	2	0	64	0
45303	Sales & Marketing	region_30	Bachelor's	m	other	1	27	1	3	0	51	0
15697	Procurement	region_17	Bachelor's	f	referred	1	27		1	1	70	0
8374	Analytics	region_28	Master's & above	m	sourcing	1	37	5	7	0	90	0
27412	Sales & Marketing	region_15	Bachelor's	m	other	1	25		1	0	50	0
49332	Procurement	region_7	Master's & above	m	other	1	41	3	3	0	67	0
5800	Technology	region_16	Below Secondary	m	other	1	22		1	0	81	0
63903	Sales & Marketing	region_2	Master's & above	m	other	1	54	3	12	0	53	1
62116	Finance	region_2	Bachelor's	f	other	1	38	5	10	0		0
9792	Sales & Marketing	region_30	Bachelor's	m	other	1	33	5	6	0	52	0
3430	Analytics	region_2	Master's & above	m	other	1	32	5	10	0	88	0
21396	Sales & Marketing	region_2		m	other	1	38	1	4	0	49	0
59882	Sales & Marketing	region_13	Bachelor's	f	sourcing	1	32	5	2	0	48	0
32567	Operations	region_2	Master's & above	m	other	1	38	5	6	0	79	1
38007	Procurement	region_5	Bachelor's	m	other	1	36	1	9	0	68	0
62785	Sales & Marketing	region_32	Bachelor's	m	sourcing	1	29	1	4	0	48	0
54039	Analytics	region_7	Bachelor's	m	other	1	45	5	12	0	85	0
76628	Legal	region_22	Bachelor's	m	sourcing	1	37	3	7	0	59	0
47539	Operations	region_13	Bachelor's	m	other	1	50	3	8	0	57	0
68206	Sales & Marketing	region_33	Bachelor's	m	sourcing	1	29	5	5	0	47	0
23393	Sales & Marketing	region_9	Master's & above	m	sourcing	1	30	2	7	0	49	0
32081	Sales & Marketing	region_4	Bachelor's	m	other	1	31	3	2	0	50	0
64479	Sales & Marketing	region_15	Master's & above	m	sourcing	1	36	1	4	0	48	0
52772	Technology	region_17	Bachelor's	m	sourcing	1	30	3	6	0	81	1
56862	Sales & Marketing	region_29	Bachelor's	m	other	1	39	1	3	0	53	0
46516	Sales & Marketing	region_2	Master's & above	f	other	1	57	4	30	0	50	0
27709	Analytics	region_2	Bachelor's	m	sourcing	1	33	3	4	0	82	1
2081	Sales & Marketing	region_29	Bachelor's	m	sourcing	1	31	2	6	0	55	0
1957	Operations	region_15	Bachelor's	m	sourcing	1	46	5	9	1	89	1
38622	Operations	region_7	Bachelor's	f	sourcing	1	31		1	0		0
59582	Sales & Marketing	region_2	Bachelor's	m	sourcing	1	36	3	9	0	51	0
63888	Finance	region_4	Master's & above	m	other	1	35	4	8	0	63	0
19930	Sales & Marketing	region_6	Bachelor's	m	other	1	29	1	3	0	51	0
75759	Operations	region_4	Bachelor's	f	sourcing	1	39	3	5	0	58	1
26297	Sales & Marketing	region_6	Bachelor's	m	sourcing	1	35	1	6	0	52	0
66115	Operations	region_22	Bachelor's	m	sourcing	1	30	3	7	0	55	0
3227	Sales & Marketing	region_26	Bachelor's	m	other	1	39	5	4	0	50	0
22076	HR	region_16	Bachelor's	m	other	1	30	3	3	0	55	0
50263	Analytics	region_8	Bachelor's	m	other	1	28	4	2	0	82	0
7900	Sales & Marketing	region_2		m	other	1	49	5	5	0	49	0
14239	Operations	region_30	Bachelor's	f	sourcing	1	30	5	6	0	60	0
35530	Technology	region_2	Bachelor's	f	sourcing	1	57	1	29	0	81	0
58211	Sales & Marketing	region_14	Bachelor's	m	other	1	29	2	5	0		0
76474	Operations	region_20	Master's & above	f	other	1	43	3	15	0	59	0
11845	HR	region_32	Bachelor's	f	sourcing	1	31	3	4	0	49	0
75144	Sales & Marketing	region_31	Bachelor's	f	other	1	24		1	0	50	0
59349	Sales & Marketing	region_2	Master's & above	f	sourcing	1	31	1	3	0	52	0
74452	Analytics	region_23	Bachelor's	m	other	1	30	4	5	0	82	0
7061	Procurement	region_20	Master's & above	f	other	1	38	5	3	0	68	0
13872	Operations	region_15	Bachelor's	m	other	1	30	3	2	0	56	0
41705	Legal	region_2	Bachelor's	m	other	1	38	3	6	1	60	0
19986	Technology	region_7	Master's & above	f	sourcing	1	42	5	12	0	77	1
8395	Procurement	region_16	Master's & above	f	sourcing	1	35	3	10	0	67	0
40320	Analytics	region_13	Bachelor's	m	other	1	26	3	2	0	85	1
5613	Sales & Marketing	region_2	Bachelor's	m	sourcing	1	35	5	9	0	50	0
69246	Operations	region_1	Master's & above	f	other	1	31	4	6	0	59	0
61621	Operations	region_2	Bachelor's	m	sourcing	1	34	4	5	0	53	0
6409	Technology	region_15	Bachelor's	m	sourcing	1	24		1	0	84	0
18955	Analytics	region_2	Bachelor's	f	sourcing	1	27	4	5	0	86	0
27771	Operations	region_16	Bachelor's	m	other	1	33	4	7	0		0
30379	Procurement	region_26	Master's & above	f	other	1	35	3	10	0	67	0
16071	Technology	region_33	Bachelor's	f	sourcing	1	30	4	5	0	80	0
74622	Technology	region_24	Bachelor's	f	sourcing	1	28	3	3	0	79	0
68572	Procurement	region_2	Bachelor's	f	referred	1	32	3	8	0	73	0
71237	Operations	region_2	Bachelor's	m	other	1	48	2	7	0	56	0
69397	Operations	region_12	Bachelor's	f	sourcing	1	36	3	5	0	57	0
70995	Analytics	region_2	Bachelor's	m	sourcing	1	27		1	0	87	0
57709	Sales & Marketing	region_16	Bachelor's	f	other	1	34	3	3	0	47	0
23667	Operations	region_2	Bachelor's	m	other	1	31	1	6	0	55	0
45563	Analytics	region_22		m	sourcing	1	28		1	0	86	0
44786	Procurement	region_17	Bachelor's	f	sourcing	1	35	4	2	0	70	0
47828	Procurement	region_4	Master's & above	f	sourcing	1	43	4	5	0	66	0
3852	Sales & Marketing	region_4	Bachelor's	m	other	1	32	3	4	0	49	0
72446	Procurement	region_20	Bachelor's	m	sourcing	1	28	3	5	0	68	0
64566	Procurement	region_11	Master's & above	f	other	1	36	5	10	0	70	0
3602	Technology	region_33	Bachelor's	m	other	1	34	3	3	1	75	1
20067	Technology	region_7	Bachelor's	f	sourcing	1	35	3	7	0	89	1
[truncated: 52,809 more rows]

## Sheet: preprocessed
no_of_trainings	previous_year_rating	length_of_service	awards_won	avg_training_score	Sum of normalized values
1	5	16	1	98	3.51243
3	4	17	1	92	3.47946
1	4	22	1	98	3.47459
3	5	7	1	96	3.44919
3	5	9	1	89	3.43324
2	5	10	1	93	3.40027
2	5	6	1	98	3.34216
2	5	11	1	84	3.3373
1	4	19	1	92	3.33351
4	5	3	1	85	3.33108
1	5	10	1	96	3.33027
1	5	14	1	85	3.32838
2	5	8	1	91	3.32622
1	5	15	1	81	3.31541
2	5	6	1	95	3.31216
1	5	11	1	91	3.3073
1	5	8	1	99	3.30622
3	5	5	1	87	3.30514
3	5	6	1	84	3.30216
1	5	11	1	90	3.2973
1	5	11	1	90	3.2973
3	5	2	1	94	3.29405
1	5	9	1	95	3.29324
3	5	5	1	85	3.28514
1	5	9	1	94	3.28324
2	5	7	1	89	3.27919
1	5	7	1	99	3.27919
1	5	8	1	96	3.27622
1	5	9	1	93	3.27324
1	5	9	1	92	3.26324
3	5	6	1	80	3.26216
2	5	3	1	98	3.26108
1	5	11	1	86	3.2573
1	5	6	1	99	3.25216
1	5	10	1	88	3.25027
2	5	5	1	91	3.24514
1	5	7	1	95	3.23919
1	4	18	1	85	3.23649
1	5	9	1	89	3.23324
4	5	3	1	75	3.23108
2	4	10	1	96	3.23027
1	5	10	1	86	3.23027
1	5	10	1	86	3.23027
2	5	7	1	84	3.22919
1	5	7	1	94	3.22919
1	5	11	1	83	3.2273
1	5	5	1	99	3.22514
2	5	7	1	83	3.21919
1	5	7	1	93	3.21919
1	5	11	1	82	3.2173
2	5	6	1	85	3.21216
1	5	10	1	84	3.21027
1	5	7	1	92	3.20919
1	5	5	1	97	3.20514
1	5	5	1	97	3.20514
1	5	5	1	97	3.20514
1	5	5	1	97	3.20514
1	5	6	1	94	3.20216
1	5	6	1	94	3.20216
1	5	6	1	94	3.20216
1	5	7	1	91	3.19919
1	5	7	1	91	3.19919
1	5	7	1	91	3.19919
1	5	4	1	99	3.19811
2	5	4	1	89	3.19811
1	5	8	1	88	3.19622
1	5	5	1	96	3.19514
1	5	5	1	96	3.19514
1	5	6	1	93	3.19216
1	5	6	1	93	3.19216
1	5	7	1	90	3.18919
1	4	18	1	80	3.18649
1	5	8	1	87	3.18622
1	5	8	1	87	3.18622
1	5	5	1	95	3.18514
1	5	6	1	92	3.18216
1	5	13	1	73	3.18135
3	5	9	1	63	3.17324
1	5	6	1	91	3.17216
1	5	6	1	91	3.17216
2	5	3	1	89	3.17108
1	5	4	1	96	3.16811
1	4	18	1	78	3.16649
1	5	8	1	85	3.16622
1	5	5	1	93	3.16514
1	5	5	1	93	3.16514
1	5	9	1	82	3.16324
1	5	3	1	98	3.16108
1	5	4	1	95	3.15811
1	5	15	1	65	3.15541
2	5	5	1	82	3.15514
1	5	5	1	92	3.15514
1	5	5	1	92	3.15514
1	5	3	1	97	3.15108
1	5	7	1	86	3.14919
2	5	4	1	84	3.14811
1	5	5	1	91	3.14514
1	5	9	1	80	3.14324
1	5	7	1	85	3.13919
2	5	4	1	83	3.13811
3	5	5	1	70	3.13514
1	5	5	1	90	3.13514
1	5	5	1	90	3.13514
1	5	7	1	84	3.12919
1	5	7	1	84	3.12919
1	5	7	1	84	3.12919
1	5	4	1	92	3.12811
2	5	4	1	82	3.12811
1	5	5	1	89	3.12514
1	5	6	1	86	3.12216
1	5	13	1	67	3.12135
1	5	3	1	94	3.12108
1	5	3	1	94	3.12108
1	5	3	1	94	3.12108
2	3	17	1	86	3.11946
1	5	7	1	83	3.11919
1	5	4	1	91	3.11811
2	5	2	1	86	3.11405
1	5	3	1	93	3.11108
1	5	3	1	93	3.11108
1	5	7	1	82	3.10919
1	5	4	1	90	3.10811
1	5	4	1	90	3.10811
1	5	2	1	95	3.10405
1	3	19	1	89	3.10351
2	5	6	1	74	3.10216
1	5	3	1	92	3.10108
1	5	3	1	92	3.10108
2	5	7	1	71	3.09919
1	5	7	1	81	3.09919
1	5	4	1	89	3.09811
1	5	4	1	89	3.09811
1	5	5	1	86	3.09514
2	5	2	1	84	3.09405
1	5	2	1	94	3.09405
2	5	4	1	78	3.08811
1	5	4	1	88	3.08811
1	5	4	1	88	3.08811
1	5	4	1	88	3.08811
1	5	5	1	85	3.08514
1	5	2	1	93	3.08405
1	5	2	1	93	3.08405
1	5	3	1	90	3.08108
1	5	3	1	90	3.08108
1	5	3	1	90	3.08108
1	5	3	1	90	3.08108
1	5	7	1	79	3.07919
1	5	5	1	84	3.07514
1	5	5	1	84	3.07514
1	5	2	1	92	3.07405
1	4	9	1	93	3.07324
2	4	6	1	91	3.07216
1	5	7	1	78	3.06919
1	4	7	1	98	3.06919
1	4	7	1	98	3.06919
1	5	4	1	86	3.06811
1	5	4	1	86	3.06811
1	5	11	1	67	3.0673
1	5	1	1	94	3.06703
1	5	5	1	83	3.06514
2	5	2	1	81	3.06405
1	5	2	1	91	3.06405
1	5	2	1	91	3.06405
1	5	2	1	91	3.06405
1	5	4	1	85	3.05811
3	4	8	1	74	3.05622
2	4	5	1	92	3.05514
1	5	2	1	90	3.05405
1	5	2	1	90	3.05405
1	5	2	1	90	3.05405
1	5	2	1	90	3.05405
1	4	16	1	72	3.05243
1	5	6	1	79	3.05216
3	3	6	1	99	3.05216
1	4	7	1	96	3.04919
1	5	4	1	84	3.04811
1	5	4	1	84	3.04811
1	5	11	1	65	3.0473
1	4	8	1	93	3.04622
1	5	6	1	78	3.04216
1	5	4	1	83	3.03811
1	5	5	1	80	3.03514
1	5	5	1	80	3.03514
1	5	2	1	88	3.03405
1	5	6	1	77	3.03216
1	5	3	1	85	3.03108
1	5	4	1	82	3.02811
1	5	4	1	82	3.02811
1	5	2	1	87	3.02405
2	3	9	1	98	3.02324
1	5	6	1	76	3.02216
1	5	3	1	84	3.02108
1	5	3	1	84	3.02108
1	5	3	1	84	3.02108
1	5	7	1	73	3.01919
1	5	4	1	81	3.01811
1	5	4	1	81	3.01811
1	5	2	1	86	3.01405
1	5	2	1	86	3.01405
1	5	10	1	64	3.01027
1	5	7	1	72	3.00919
1	5	7	1	72	3.00919
2	5	2	1	75	3.00405
1	5	2	1	85	3.00405
1	4	7	1	91	2.99919
3	4	4	1	79	2.99811
1	5	4	1	79	2.99811
1	5	4	1	79	2.99811
3	5	2	1	64	2.99405
1	5	2	1	84	2.99405
1	4	6	1	93	2.99216
1	5	3	1	81	2.99108
1	5	3	1	81	2.99108
1	3	17	1	83	2.98946
2	4	7	1	80	2.98919
1	5	7	1	70	2.98919
1	5	7	1	70	2.98919
2	5	34	0	87	2.98892
1	5	4	1	78	2.98811
1	3	11	1	99	2.9873
1	5	5	1	75	2.98514
1	5	2	1	83	2.98405
1	5	2	1	83	2.98405
1	5	2	1	83	2.98405
1	5	6	1	72	2.98216
1	5	6	1	72	2.98216
1	5	3	1	80	2.98108
1	5	3	1	80	2.98108
1	5	7	1	69	2.97919
1	4	4	1	97	2.97811
1	3	18	1	79	2.97649
1	4	18	1	59	2.97649
1	4	5	1	94	2.97514
1	3	12	1	95	2.97432
1	5	2	1	82	2.97405
1	5	6	1	71	2.97216
1	4	6	1	91	2.97216
1	5	3	1	79	2.97108
1	5	3	1	79	2.97108
1	5	7	1	68	2.96919
1	3	11	1	97	2.9673
3	4	3	1	78	2.96108
1	5	4	1	75	2.95811
1	3	11	1	96	2.9573
1	5	5	1	72	2.95514
2	4	5	1	82	2.95514
1	5	2	1	80	2.95405
1	5	2	1	80	2.95405
1	4	6	1	89	2.95216
1	4	4	1	94	2.94811
1	4	4	1	94	2.94811
4	3	4	1	84	2.94811
1	3	15	1	84	2.94541
1	4	5	1	91	2.94514
1	5	5	1	71	2.94514
6	4	2	1	49	2.94405
1	5	2	1	79	2.94405
1	5	9	1	60	2.94324
1	4	6	1	88	2.94216
1	4	3	1	96	2.94108
1	5	10	1	57	2.94027
1	5	7	1	65	2.93919
1	5	4	1	73	2.93811
1	5	4	1	73	2.93811
1	4	4	1	93	2.93811
2	5	4	1	63	2.93811
1	5	8	1	62	2.93622
1	5	8	1	62	2.93622
1	5	5	1	70	2.93514
1	5	2	1	78	2.93405
1	4	2	1	98	2.93405
1	3	9	1	99	2.93324
1	5	6	1	67	2.93216
1	4	6	1	87	2.93216
2	4	3	1	85	2.93108
1	4	3	1	95	2.93108
2	5	7	1	54	2.92919
1	5	7	1	64	2.92919
1	5	7	1	64	2.92919
1	5	4	1	72	2.92811
1	5	4	1	72	2.92811
1	4	4	1	92	2.92811
1	3	11	1	93	2.9273
1	4	18	1	54	2.92649
1	3	15	1	82	2.92541
1	5	2	1	77	2.92405
1	4	6	1	86	2.92216
1	4	3	1	94	2.92108
1	4	17	1	56	2.91946
1	4	7	1	83	2.91919
1	5	4	1	71	2.91811
2	3	8	1	90	2.91622
1	5	8	1	60	2.91622
2	4	2	1	86	2.91405
1	5	2	1	76	2.91405
1	5	2	1	76	2.91405
1	5	3	1	73	2.91108
2	3	10	1	84	2.91027
1	3	10	1	94	2.91027
3	3	10	1	74	2.91027
1	5	7	1	62	2.90919
1	5	4	1	70	2.90811
1	5	4	1	70	2.90811
1	4	4	1	90	2.90811
1	4	4	1	90	2.90811
1	4	4	1	90	2.90811
2	4	4	1	80	2.90811
1	4	5	1	87	2.90514
1	5	5	1	67	2.90514
1	5	5	1	67	2.90514
1	5	2	1	75	2.90405
1	4	6	1	84	2.90216
1	5	3	1	72	2.90108
1	4	3	1	92	2.90108
1	4	3	1	92	2.90108
3	3	4	1	89	2.89811
1	4	4	1	89	2.89811
1	4	4	1	89	2.89811
2	3	4	1	99	2.89811
1	5	5	1	66	2.89514
2	4	2	1	84	2.89405
1	5	9	1	55	2.89324
1	5	7	1	60	2.88919
1	5	7	1	60	2.88919
1	3	14	1	81	2.88838
1	5	4	1	68	2.88811
2	4	2	1	83	2.88405
2	4	6	1	72	2.88216
2	4	3	1	80	2.88108
1	5	7	1	59	2.87919
1	5	7	1	59	2.87919
1	4	7	1	79	2.87919
2	3	5	1	94	2.87514
2	3	5	1	94	2.87514
1	4	2	1	92	2.87405
3	3	2	1	92	2.87405
1	5	2	1	72	2.87405
1	5	2	1	72	2.87405
1	4	6	1	81	2.87216
1	5	3	1	69	2.87108
1	5	7	1	58	2.86919
1	5	7	1	58	2.86919
3	3	4	1	86	2.86811
3	5	25	0	89	2.86568
1	4	5	1	83	2.86514
2	4	2	1	81	2.86405
4	4	6	1	50	2.86216
1	5	6	1	60	2.86216
2	5	6	1	50	2.86216
2	3	3	1	98	2.86108
1	4	3	1	88	2.86108
1	4	4	1	85	2.85811
2	4	4	1	75	2.85811
1	4	1	1	93	2.85703
1	3	18	1	67	2.85649
1	4	5	1	82	2.85514
1	4	5	1	82	2.85514
1	4	5	1	82	2.85514
1	5	2	1	70	2.85405
1	5	6	1	59	2.85216
1	4	6	1	79	2.85216
1	5	3	1	67	2.85108
2	5	7	1	46	2.84919
1	5	7	1	56	2.84919
1	5	4	1	64	2.84811
1	5	4	1	64	2.84811
1	4	4	1	84	2.84811
1	4	4	1	84	2.84811
2	5	5	1	51	2.84514
2	5	5	1	51	2.84514
1	3	12	1	82	2.84432
2	4	9	1	60	2.84324
1	5	6	1	58	2.84216
1	5	6	1	58	2.84216
1	5	6	1	58	2.84216
1	5	3	1	66	2.84108
1	4	3	1	86	2.84108
2	3	4	1	93	2.83811
1	5	4	1	63	2.83811
1	5	4	1	63	2.83811
1	5	4	1	63	2.83811
1	3	8	1	92	2.83622
1	3	8	1	92	2.83622
2	5	5	1	50	2.83514
1	5	5	1	60	2.83514
1	5	2	1	68	2.83405
1	4	3	1	85	2.83108
1	3	7	1	94	2.82919
1	5	1	1	70	2.82703
2	5	5	1	49	2.82514
1	5	5	1	59	2.82514
1	5	2	1	67	2.82405
1	5	2	1	67	2.82405
1	3	6	1	96	2.82216
1	3	13	1	77	2.82135
1	5	3	1	64	2.82108
1	5	3	1	64	2.82108
1	4	3	1	84	2.82108
1	4	3	1	84	2.82108
2	3	7	1	83	2.81919
1	4	4	1	81	2.81811
1	5	8	1	50	2.81622
1	3	8	1	90	2.81622
2	3	5	1	88	2.81514
1	5	2	1	66	2.81405
1	4	2	1	86	2.81405
2	5	3	1	53	2.81108
2	3	3	1	93	2.81108
1	4	3	1	83	2.81108
2	3	7	1	82	2.80919
1	3	7	1	92	2.80919
3	3	7	1	72	2.80919
1	4	7	1	72	2.80919
1	4	7	1	72	2.80919
1	5	4	1	60	2.80811
1	5	4	1	60	2.80811
1	5	5	1	57	2.80514
1	3	5	1	97	2.80514
1	5	6	1	54	2.80216
2	3	6	1	84	2.80216
2	3	3	1	92	2.80108
1	5	3	1	62	2.80108
1	5	7	1	51	2.79919
1	5	7	1	51	2.79919
2	3	4	1	89	2.79811
2	3	4	1	89	2.79811
1	5	4	1	59	2.79811
1	5	4	1	59	2.79811
1	5	4	1	59	2.79811
1	4	4	1	79	2.79811
1	4	4	1	79	2.79811
1	4	4	1	79	2.79811
1	5	2	1	64	2.79405
1	5	6	1	53	2.79216
1	5	33	0	80	2.79189
2	5	3	1	51	2.79108
1	4	10	1	62	2.79027
1	4	10	1	62	2.79027
1	4	7	1	70	2.78919
1	3	7	1	90	2.78919
1	5	4	1	58	2.78811
1	5	4	1	58	2.78811
1	4	4	1	78	2.78811
1	3	8	1	87	2.78622
1	5	5	1	55	2.78514
1	5	3	1	60	2.78108
1	5	3	1	60	2.78108
1	5	3	1	60	2.78108
2	4	3	1	70	2.78108
1	4	3	1	80	2.78108
1	5	4	1	57	2.77811
1	4	11	1	58	2.7773
1	3	8	1	86	2.77622
1	4	2	1	82	2.77405
1	3	9	1	83	2.77324
2	3	6	1	81	2.77216
1	3	6	1	91	2.77216
1	5	3	1	59	2.77108
1	4	3	1	79	2.77108
3	3	7	1	68	2.76919
1	5	7	1	48	2.76919
1	3	7	1	88	2.76919
1	3	7	1	88	2.76919
1	5	4	1	56	2.76811
1	3	4	1	96	2.76811
3	3	5	1	73	2.76514
2	3	5	1	83	2.76514
2	3	5	1	83	2.76514
1	4	2	1	81	2.76405
1	5	6	1	50	2.76216
1	5	6	1	50	2.76216
1	3	4	1	95	2.75811
1	4	1	1	83	2.75703
1	5	1	1	63	2.75703
1	4	5	1	72	2.75514
2	5	32	0	69	2.75486
1	3	12	1	73	2.75432
1	5	2	1	60	2.75405
1	5	2	1	60	2.75405
1	5	2	1	60	2.75405
1	4	2	1	80	2.75405
1	4	2	1	80	2.75405
1	4	2	1	80	2.75405
1	4	2	1	80	2.75405
1	3	9	1	81	2.75324
1	3	9	1	81	2.75324
1	5	6	1	49	2.75216
1	4	6	1	69	2.75216
1	4	6	1	69	2.75216
1	4	6	1	69	2.75216
2	3	7	1	76	2.74919
1	4	4	1	74	2.74811
1	3	4	1	94	2.74811
1	3	8	1	83	2.74622
2	3	5	1	81	2.74514
1	5	5	1	51	2.74514
2	5	2	1	49	2.74405
1	5	2	1	59	2.74405
1	5	2	1	59	2.74405
1	5	29	0	86	2.74378
2	3	6	1	78	2.74216
1	5	6	1	48	2.74216
1	3	6	1	88	2.74216
1	5	3	1	56	2.74108
1	5	3	1	56	2.74108
1	4	4	1	73	2.73811
2	4	5	1	60	2.73514
1	5	5	1	50	2.73514
1	5	5	1	50	2.73514
2	3	2	1	88	2.73405
2	3	2	1	88	2.73405
1	3	9	1	79	2.73324
1	3	9	1	79	2.73324
1	5	6	1	47	2.73216
2	4	6	1	57	2.73216
1	4	6	1	67	2.73216
1	3	6	1	87	2.73216
1	5	3	1	55	2.73108
1	4	3	1	75	2.73108
1	3	10	1	76	2.73027
1	3	14	1	65	2.72838
2	3	4	1	82	2.72811
1	3	8	1	81	2.72622
1	4	5	1	69	2.72514
2	3	5	1	79	2.72514
2	3	5	1	79	2.72514
1	4	2	1	77	2.72405
1	5	2	1	57	2.72405
1	5	2	1	57	2.72405
1	5	6	1	46	2.72216
1	3	6	1	86	2.72216
1	3	7	1	83	2.71919
2	3	4	1	81	2.71811
2	3	4	1	81	2.71811
1	4	4	1	71	2.71811
1	3	11	1	72	2.7173
1	4	8	1	60	2.71622
1	5	5	1	48	2.71514
2	5	2	1	46	2.71405
1	3	2	1	96	2.71405
1	3	9	1	77	2.71324
1	4	6	1	65	2.71216
2	5	23	0	89	2.71162
1	5	3	1	53	2.71108
1	5	3	1	53	2.71108
1	3	3	1	93	2.71108
2	3	7	1	72	2.70919
1	4	7	1	62	2.70919
1	4	7	1	62	2.70919
1	4	7	1	62	2.70919
1	3	7	1	82	2.70919
1	5	4	1	50	2.70811
1	5	4	1	50	2.70811
1	5	4	1	50	2.70811
1	4	8	1	59	2.70622
1	3	15	1	60	2.70541
1	5	2	1	55	2.70405
5	1	19	1	49	2.70351
3	3	3	1	72	2.70108
1	3	7	1	81	2.69919
1	5	4	1	49	2.69811
1	3	15	1	59	2.69541
1	4	5	1	66	2.69514
1	3	5	1	86	2.69514
2	3	2	1	84	2.69405
1	5	2	1	54	2.69405
1	5	2	1	54	2.69405
1	3	2	1	94	2.69405
1	3	2	1	94	2.69405
1	5	3	1	51	2.69108
1	3	3	1	91	2.69108
7	5	10	0	72	2.69027
1	3	10	1	72	2.69027
1	5	27	0	86	2.68973
1	4	7	1	60	2.68919
1	5	4	1	48	2.68811
2	4	4	1	58	2.68811
1	3	4	1	88	2.68811
1	5	2	1	53	2.68405
2	5	37	0	48	2.68
1	3	7	1	79	2.67919
1	3	7	1	79	2.67919
1	3	7	1	79	2.67919
1	4	4	1	67	2.67811
1	4	5	1	64	2.67514
2	4	2	1	62	2.67405
2	3	2	1	82	2.67405
2	3	2	1	82	2.67405
1	5	2	1	52	2.67405
1	4	2	1	72	2.67405
1	3	6	1	81	2.67216
1	5	23	0	95	2.67162
1	5	3	1	49	2.67108
1	5	3	1	49	2.67108
2	4	3	1	59	2.67108
1	3	3	1	89	2.67108
1	4	10	1	50	2.67027
2	4	7	1	48	2.66919
1	3	7	1	78	2.66919
1	4	4	1	66	2.66811
1	3	4	1	86	2.66811
1	3	5	1	83	2.66514
2	3	2	1	81	2.66405
1	3	2	1	91	2.66405
1	4	2	1	71	2.66405
1	4	2	1	71	2.66405
2	3	6	1	70	2.66216
1	4	6	1	60	2.66216
1	3	6	1	80	2.66216
1	3	3	1	88	2.66108
1	3	3	1	88	2.66108
1	2	7	1	97	2.65919
3	3	7	1	57	2.65919
1	4	7	1	57	2.65919
1	3	4	1	85	2.65811
1	3	4	1	85	2.65811
2	3	2	1	80	2.65405
1	4	2	1	70	2.65405
1	4	2	1	70	2.65405
2	3	6	1	69	2.65216
1	4	6	1	59	2.65216
1	3	6	1	79	2.65216
1	3	6	1	79	2.65216
1	5	3	1	47	2.65108
1	5	3	1	47	2.65108
1	5	3	1	47	2.65108
1	3	7	1	76	2.64919
1	4	4	1	64	2.64811
1	4	2	1	69	2.64405
3	3	2	1	69	2.64405
1	4	9	1	50	2.64324
1	5	33	0	65	2.64189
1	5	34	0	62	2.63892
1	4	4	1	63	2.63811
1	3	4	1	83	2.63811
1	3	4	1	83	2.63811
1	4	5	1	60	2.63514
1	4	5	1	60	2.63514
1	4	2	1	68	2.63405
1	3	2	1	88	2.63405
1	3	3	1	85	2.63108
1	3	10	1	66	2.63027
1	5	27	0	80	2.62973
7	4	17	0	67	2.62946
1	4	4	1	62	2.62811
1	4	5	1	59	2.62514
1	3	5	1	79	2.62514
1	3	5	1	79	2.62514
10	3	12	0	70	2.62432
1	3	2	1	87	2.62405
1	3	2	1	87	2.62405
1	3	6	1	76	2.62216
1	5	3	1	44	2.62108
1	4	3	1	64	2.62108
1	3	3	1	84	2.62108
1	5	24	0	87	2.61865
1	3	4	1	81	2.61811
1	3	4	1	81	2.61811
1	5	31	0	68	2.61784
1	3	11	1	62	2.6173
1	4	5	1	58	2.61514
1	3	2	1	86	2.61405
1	5	29	0	73	2.61378
1	3	9	1	67	2.61324
1	3	3	1	83	2.61108
1	5	20	0	97	2.61054
2	3	7	1	62	2.60919
1	3	7	1	72	2.60919
1	3	7	1	72	2.60919
1	3	7	1	72	2.60919
1	4	4	1	60	2.60811
2	3	4	1	70	2.60811
1	3	4	1	80	2.60811
1	3	4	1	80	2.60811
1	4	5	1	57	2.60514
1	3	5	1	77	2.60514
1	3	6	1	74	2.60216
3	3	3	1	62	2.60108
2	3	3	1	72	2.60108
1	4	4	1	59	2.59811
1	4	4	1	59	2.59811
1	3	4	1	79	2.59811
1	3	4	1	79	2.59811
2	3	8	1	58	2.59622
1	4	8	1	48	2.59622
1	5	32	0	63	2.59486
1	4	2	1	64	2.59405
1	3	2	1	84	2.59405
3	4	19	0	98	2.59351
1	3	3	1	81	2.59108
1	5	30	0	68	2.59081
2	3	7	1	60	2.58919
1	4	7	1	50	2.58919
1	4	7	1	50	2.58919
1	3	7	1	70	2.58919
1	3	7	1	70	2.58919
1	3	7	1	70	2.58919
1	4	4	1	58	2.58811
1	4	4	1	58	2.58811
1	4	4	1	58	2.58811
1	3	4	1	78	2.58811
1	3	4	1	78	2.58811
2	4	4	1	48	2.58811
2	5	18	0	90	2.58649
1	3	5	1	75	2.58514
1	2	5	1	95	2.58514
1	5	32	0	62	2.58486
1	4	2	1	63	2.58405
1	4	6	1	52	2.58216
2	4	3	1	50	2.58108
2	5	20	0	84	2.58054
3	3	7	1	49	2.57919
1	3	7	1	69	2.57919
1	3	7	1	69	2.57919
1	2	7	1	89	2.57919
1	2	7	1	89	2.57919
2	3	4	1	67	2.57811
1	4	4	1	57	2.57811
1	4	4	1	57	2.57811
1	4	4	1	57	2.57811
1	3	4	1	77	2.57811
1	5	29	0	69	2.57378
1	3	6	1	71	2.57216
1	5	33	0	58	2.57189
6	2	3	1	49	2.57108
1	4	3	1	59	2.57108
1	4	3	1	59	2.57108
1	3	3	1	79	2.57108
1	3	3	1	79	2.57108
3	5	24	0	62	2.56865
1	2	4	1	96	2.56811
1	2	4	1	96	2.56811
1	3	2	1	81	2.56405
2	3	6	1	60	2.56216
1	4	6	1	50	2.56216
1	4	6	1	50	2.56216
1	3	6	1	70	2.56216
1	3	3	1	78	2.56108
1	3	3	1	78	2.56108
1	3	3	1	78	2.56108
1	3	7	1	67	2.55919
1	3	7	1	67	2.55919
1	3	1	1	83	2.55703
1	5	25	0	78	2.55568
1	4	5	1	52	2.55514
1	3	5	1	72	2.55514
1	3	2	1	80	2.55405
1	3	2	1	80	2.55405
1	4	2	1	60	2.55405
1	4	2	1	60	2.55405
1	4	2	1	60	2.55405
2	4	29	0	77	2.55378
2	4	29	0	77	2.55378
1	4	6	1	49	2.55216
1	4	3	1	57	2.55108
1	4	3	1	57	2.55108
1	3	7	1	66	2.54919
1	4	7	1	46	2.54919
1	4	4	1	54	2.54811
1	4	4	1	54	2.54811
1	5	21	0	88	2.54757
1	3	1	1	82	2.54703
4	5	8	0	93	2.54622
3	3	5	1	51	2.54514
1	4	5	1	51	2.54514
1	4	2	1	59	2.54405
1	3	2	1	79	2.54405
2	3	6	1	58	2.54216
1	3	6	1	68	2.54216
1	5	23	0	82	2.54162
1	4	3	1	56	2.54108
1	3	7	1	65	2.53919
1	4	4	1	53	2.53811
1	4	4	1	53	2.53811
2	4	31	0	70	2.53784
2	5	18	0	85	2.53649
2	5	18	0	85	2.53649
1	5	25	0	76	2.53568
3	5	15	0	83	2.53541
3	3	5	1	50	2.53514
1	3	5	1	70	2.53514
1	1	12	1	91	2.53432
1	4	2	1	58	2.53405
1	3	9	1	59	2.53324
1	4	3	1	55	2.53108
1	3	3	1	75	2.53108
1	3	3	1	75	2.53108
1	5	27	0	70	2.52973
1	4	4	1	52	2.52811
1	3	4	1	72	2.52811
1	5	18	0	94	2.52649
3	3	5	1	49	2.52514
1	3	5	1	69	2.52514
1	5	22	0	83	2.52459
1	3	2	1	77	2.52405
1	3	2	1	77	2.52405
1	3	9	1	58	2.52324
1	3	3	1	74	2.52108
1	3	3	1	74	2.52108
1	5	27	0	69	2.51973
1	5	27	0	69	2.51973
1	4	4	1	51	2.51811
1	4	4	1	51	2.51811
1	3	4	1	71	2.51811
1	3	4	1	71	2.51811
1	4	31	0	78	2.51784
1	5	28	0	66	2.51676
2	3	2	1	66	2.51405
1	3	2	1	76	2.51405
1	5	29	0	63	2.51378
2	5	19	0	80	2.51351
1	1	9	1	97	2.51324
2	5	16	0	88	2.51243
1	5	16	0	98	2.51243
1	3	6	1	65	2.51216
1	3	10	1	54	2.51027
1	3	10	1	54	2.51027
2	5	27	0	58	2.50973
1	4	27	0	88	2.50973
2	5	17	0	85	2.50946
2	3	4	1	60	2.50811
1	4	4	1	50	2.50811
1	3	4	1	70	2.50811
1	3	4	1	70	2.50811
2	3	5	1	57	2.50514
1	3	5	1	67	2.50514
1	3	2	1	75	2.50405
3	5	19	0	69	2.50351
1	5	16	0	97	2.50243
6	4	16	0	67	2.50243
1	2	6	1	84	2.50216
1	3	3	1	72	2.50108
1	3	3	1	72	2.50108
1	2	7	1	81	2.49919
3	5	14	0	82	2.49838
1	4	4	1	49	2.49811
1	3	4	1	69	2.49811
1	3	4	1	69	2.49811
1	2	4	1	89	2.49811
3	5	8	0	98	2.49622
2	4	25	0	82	2.49568
1	4	5	1	46	2.49514
1	5	19	0	88	2.49351
1	5	26	0	69	2.4927
3	5	13	0	84	2.49135
1	4	3	1	51	2.49108
1	3	10	1	52	2.49027
6	5	7	0	70	2.48919
1	3	7	1	60	2.48919
1	2	7	1	80	2.48919
2	3	4	1	58	2.48811
1	4	4	1	48	2.48811
1	4	4	1	48	2.48811
1	5	28	0	63	2.48676
1	4	28	0	83	2.48676
1	5	25	0	71	2.48568
1	4	2	1	53	2.48405
1	4	2	1	53	2.48405
4	5	6	0	92	2.48216
1	3	6	1	62	2.48216
3	3	3	1	50	2.48108
1	4	3	1	50	2.48108
1	4	3	1	50	2.48108
1	3	3	1	70	2.48108
1	3	3	1	70	2.48108
3	5	10	0	91	2.48027
1	4	4	1	47	2.47811
1	3	11	1	48	2.4773
1	4	2	1	52	2.47405
3	4	19	0	86	2.47351
1	5	19	0	86	2.47351
4	5	9	0	83	2.47324
2	4	23	0	85	2.47162
2	3	3	1	59	2.47108
1	3	3	1	69	2.47108
3	5	7	0	98	2.46919
2	3	7	1	48	2.46919
1	3	7	1	58	2.46919
1	3	7	1	58	2.46919
1	3	7	1	58	2.46919
1	3	7	1	58	2.46919
1	3	7	1	58	2.46919
1	5	18	0	88	2.46649
1	4	2	1	51	2.46405
1	3	2	1	71	2.46405
4	5	6	0	90	2.46216
1	3	6	1	60	2.46216
1	3	6	1	60	2.46216
1	3	6	1	60	2.46216
1	3	6	1	60	2.46216
1	5	23	0	74	2.46162
5	4	17	0	70	2.45946
2	3	7	1	47	2.45919
1	3	7	1	57	2.45919
1	2	7	1	77	2.45919
1	3	34	0	84	2.45892
1	5	24	0	71	2.45865
1	3	4	1	65	2.45811
2	5	15	0	85	2.45541
2	3	5	1	52	2.45514
1	3	5	1	62	2.45514
1	3	5	1	62	2.45514
2	5	22	0	66	2.45459
1	4	2	1	50	2.45405
1	4	2	1	50	2.45405
1	3	2	1	70	2.45405
1	3	2	1	70	2.45405
1	5	19	0	84	2.45351
1	5	19	0	84	2.45351
1	3	6	1	59	2.45216
2	3	3	1	57	2.45108
1	3	3	1	67	2.45108
1	4	3	1	47	2.45108
1	4	3	1	47	2.45108
1	4	3	1	47	2.45108
1	4	3	1	47	2.45108
1	5	30	0	54	2.45081
4	5	20	0	51	2.45054
1	5	20	0	81	2.45054
1	5	20	0	81	2.45054
1	5	27	0	62	2.44973
2	3	7	1	46	2.44919
1	5	24	0	70	2.44865
1	3	4	1	64	2.44811
1	3	4	1	64	2.44811
1	4	28	0	79	2.44676
3	5	12	0	82	2.44432
1	4	2	1	49	2.44405
1	4	2	1	49	2.44405
1	3	2	1	69	2.44405
1	5	19	0	83	2.44351
2	5	19	0	73	2.44351
3	5	16	0	71	2.44243
1	5	23	0	72	2.44162
10	3	13	0	49	2.44135
3	5	13	0	79	2.44135
2	3	3	1	56	2.44108
1	4	3	1	46	2.44108
1	5	17	0	88	2.43946
1	5	24	0	69	2.43865
1	5	24	0	69	2.43865
1	4	4	1	43	2.43811
1	3	4	1	63	2.43811
1	5	31	0	50	2.43784
1	5	25	0	66	2.43568
1	5	25	0	66	2.43568
2	3	5	1	50	2.43514
2	3	5	1	50	2.43514
1	3	5	1	60	2.43514
1	3	5	1	60	2.43514
1	3	5	1	60	2.43514
1	3	5	1	60	2.43514
1	2	5	1	80	2.43514
2	5	12	0	91	2.43432
1	1	12	1	81	2.43432
1	3	2	1	68	2.43405
1	3	2	1	68	2.43405
1	3	2	1	68	2.43405
1	5	19	0	82	2.43351
1	5	16	0	90	2.43243
1	3	10	1	46	2.43027
1	5	17	0	87	2.42946
1	3	7	1	54	2.42919
2	5	14	0	85	2.42838
1	3	4	1	62	2.42811
1	3	4	1	62	2.42811
1	4	31	0	69	2.42784
1	5	18	0	84	2.42649
1	5	18	0	84	2.42649
1	5	19	0	81	2.42351
3	5	9	0	88	2.42324
1	3	9	1	48	2.42324
1	5	26	0	62	2.4227
1	4	26	0	82	2.4227
1	5	33	0	43	2.42189
1	4	3	1	44	2.42108
1	3	3	1	64	2.42108
1	5	20	0	78	2.42054
1	2	7	1	73	2.41919
2	3	4	1	51	2.41811
2	5	11	0	92	2.4173
4	4	18	0	73	2.41649
7	5	8	0	50	2.41622
4	5	5	0	88	2.41514
1	3	5	1	58	2.41514
1	3	5	1	58	2.41514
1	3	5	1	58	2.41514
1	3	5	1	58	2.41514
1	3	5	1	58	2.41514
2	4	22	0	82	2.41459
3	5	12	0	79	2.41432
3	5	12	0	79	2.41432
1	4	2	1	46	2.41405
1	2	2	1	86	2.41405
1	2	2	1	86	2.41405
2	5	19	0	70	2.41351
1	1	19	1	60	2.41351
3	5	9	0	87	2.41324
4	4	16	0	78	2.41243
4	5	6	0	85	2.41216
1	3	3	1	63	2.41108
1	2	3	1	83	2.41108
1	2	3	1	83	2.41108
1	5	20	0	77	2.41054
1	5	14	0	93	2.40838
4	5	4	0	90	2.40811
2	1	4	1	90	2.40811
1	2	4	1	80	2.40811
1	2	4	1	80	2.40811
4	5	8	0	79	2.40622
2	3	5	1	47	2.40514
1	3	5	1	57	2.40514
1	2	5	1	77	2.40514
1	4	19	0	99	2.40351
1	5	26	0	60	2.4027
1	5	26	0	60	2.4027
1	4	26	0	80	2.4027
1	3	33	0	81	2.40189
1	3	33	0	81	2.40189
1	5	13	0	95	2.40135
2	5	13	0	85	2.40135
8	4	3	0	72	2.40108
2	3	3	1	52	2.40108
1	3	3	1	62	2.40108
1	3	3	1	62	2.40108
2	4	20	0	86	2.40054
1	5	20	0	76	2.40054
3	5	10	0	83	2.40027
3	5	10	0	83	2.40027
1	5	27	0	57	2.39973
1	5	27	0	57	2.39973
4	5	7	0	81	2.39919
1	3	7	1	51	2.39919
1	3	7	1	51	2.39919
1	4	24	0	85	2.39865
2	5	14	0	82	2.39838
5	5	4	0	79	2.39811
1	3	4	1	59	2.39811
1	3	4	1	59	2.39811
1	3	4	1	59	2.39811
1	3	4	1	59	2.39811
1	3	4	1	59	2.39811
1	3	4	1	59	2.39811
2	5	21	0	63	2.39757
1	5	28	0	54	2.39676
2	5	18	0	71	2.39649
1	5	25	0	62	2.39568
1	5	25	0	62	2.39568
4	5	5	0	86	2.39514
4	5	5	0	86	2.39514
1	3	5	1	56	2.39514
1	5	22	0	70	2.39459
1	3	2	1	64	2.39405
1	3	2	1	64	2.39405
1	5	19	0	78	2.39351
1	5	19	0	78	2.39351
1	5	16	0	86	2.39243
1	5	16	0	86	2.39243
3	5	6	0	93	2.39216
3	5	10	0	82	2.39027
1	3	7	1	50	2.38919
1	3	7	1	50	2.38919
1	3	7	1	50	2.38919
1	1	7	1	90	2.38919
2	5	14	0	81	2.38838
1	3	4	1	58	2.38811
1	3	4	1	58	2.38811
1	3	4	1	58	2.38811
1	2	4	1	78	2.38811
1	5	18	0	80	2.38649
1	5	18	0	80	2.38649
3	5	8	0	87	2.38622
2	5	15	0	78	2.38541
1	5	15	0	88	2.38541
1	5	15	0	88	2.38541
1	5	15	0	88	2.38541
2	5	12	0	86	2.38432
1	3	2	1	63	2.38405
1	3	29	0	90	2.38378
1	5	19	0	77	2.38351
3	5	9	0	84	2.38324
1	5	26	0	58	2.3827
1	5	16	0	85	2.38243
1	5	16	0	85	2.38243
1	3	6	1	52	2.38216
1	2	6	1	72	2.38216
1	1	6	1	92	2.38216
2	5	23	0	56	2.38162
1	3	3	1	60	2.38108
1	3	3	1	60	2.38108
1	3	3	1	60	2.38108
1	3	3	1	60	2.38108
3	5	10	0	81	2.38027
1	5	17	0	82	2.37946
1	5	17	0	82	2.37946
3	5	7	0	89	2.37919
2	5	7	0	99	2.37919
1	3	7	1	49	2.37919
2	3	4	1	47	2.37811
1	3	4	1	57	2.37811
1	3	4	1	57	2.37811
1	5	21	0	71	2.37757
1	5	18	0	79	2.37649
1	3	5	1	54	2.37514
2	5	12	0	85	2.37432
2	3	2	1	52	2.37405
1	3	2	1	62	2.37405
1	3	2	1	62	2.37405
2	5	9	0	93	2.37324
1	4	26	0	77	2.3727
1	5	16	0	84	2.37243
1	3	6	1	51	2.37216
2	5	13	0	82	2.37135
1	5	13	0	92	2.37135
10	3	3	0	69	2.37108
1	3	3	1	59	2.37108
1	5	17	0	81	2.36946
1	5	17	0	81	2.36946
3	5	7	0	88	2.36919
1	3	7	1	48	2.36919
1	5	24	0	62	2.36865
4	5	4	0	86	2.36811
1	5	18	0	78	2.36649
1	2	5	1	73	2.36514
1	5	22	0	67	2.36459
4	4	12	0	84	2.36432
2	5	12	0	84	2.36432
10	3	2	0	71	2.36405
5	5	2	0	81	2.36405
2	5	19	0	65	2.36351
3	5	9	0	82	2.36324
2	5	16	0	73	2.36243
6	4	6	0	80	2.36216
4	5	6	0	80	2.36216
1	3	6	1	50	2.36216
1	5	13	0	91	2.36135
5	5	3	0	78	2.36108
3	5	3	0	98	2.36108
1	3	3	1	58	2.36108
1	3	3	1	58	2.36108
1	1	3	1	98	2.36108
1	4	30	0	65	2.36081
1	5	20	0	72	2.36054
5	4	10	0	79	2.36027
3	5	7	0	87	2.35919
3	5	7	0	87	2.35919
1	3	7	1	47	2.35919
1	2	7	1	67	2.35919
9	3	4	0	75	2.35811
1	3	4	1	55	2.35811
1	3	4	1	55	2.35811
1	3	4	1	55	2.35811
1	3	4	1	55	2.35811
1	3	4	1	55	2.35811
1	4	31	0	62	2.35784
1	3	31	0	82	2.35784
1	3	31	0	82	2.35784
1	5	11	0	96	2.3573
1	5	18	0	77	2.35649
1	2	8	1	64	2.35622
1	5	25	0	58	2.35568
3	1	5	1	72	2.35514
1	5	22	0	66	2.35459
1	3	2	1	60	2.35405
1	3	2	1	60	2.35405
1	5	26	0	55	2.3527
1	5	16	0	82	2.35243
1	1	16	1	62	2.35243
1	3	6	1	49	2.35216
1	3	6	1	49	2.35216
1	3	6	1	49	2.35216
1	5	23	0	63	2.35162
1	3	3	1	57	2.35108
1	3	3	1	57	2.35108
2	5	10	0	88	2.35027
1	5	10	0	98	2.35027
1	4	27	0	72	2.34973
4	5	7	0	76	2.34919
3	5	7	0	86	2.34919
3	5	7	0	86	2.34919
2	5	7	0	96	2.34919
1	5	24	0	60	2.34865
1	5	14	0	87	2.34838
3	5	14	0	67	2.34838
4	5	4	0	84	2.34811
1	2	4	1	74	2.34811
1	1	4	1	94	2.34811
2	5	11	0	85	2.3473
5		1	1	82	2.34703
2	5	18	0	66	2.34649
1	4	25	0	77	2.34568
1	5	15	0	84	2.34541
2	5	22	0	55	2.34459
1	5	12	0	92	2.34432
2	5	12	0	82	2.34432
2	3	2	1	49	2.34405
1	5	19	0	73	2.34351
1	5	16	0	81	2.34243
1	3	3	1	56	2.34108
1	3	3	1	56	2.34108
1	2	3	1	76	2.34108
4	5	3	0	86	2.34108
4	5	3	0	86	2.34108
1	5	20	0	70	2.34054
3	5	10	0	77	2.34027
1	5	10	0	97	2.34027
1	5	10	0	97	2.34027
3	5	17	0	58	2.33946
2	5	17	0	68	2.33946
5	4	7	0	85	2.33919
3	5	7	0	85	2.33919
2	3	4	1	43	2.33811
2	1	4	1	83	2.33811
1	3	4	1	53	2.33811
1	3	4	1	53	2.33811
4	5	4	0	83	2.33811
1	3	31	0	80	2.33784
1	5	21	0	67	2.33757
1	5	28	0	48	2.33676
1	5	18	0	75	2.33649
1	5	18	0	75	2.33649
1	3	5	1	50	2.33514
1	3	5	1	50	2.33514
1	3	5	1	50	2.33514
2	5	12	0	81	2.33432
2	3	2	1	48	2.33405
1	3	2	1	58	2.33405
1	5	19	0	72	2.33351
1	5	19	0	72	2.33351
1	4	26	0	73	2.3327
1	5	16	0	80	2.33243
4	5	6	0	77	2.33216
3	5	6	0	87	2.33216
2	5	13	0	78	2.33135
1	3	3	1	55	2.33108
1	3	3	1	55	2.33108
2	5	10	0	86	2.33027
2	5	10	0	86	2.33027
1	5	10	0	96	2.33027
1	5	17	0	77	2.32946
3	5	7	0	84	2.32919
1	1	7	1	84	2.32919
1	4	24	0	78	2.32865
4	5	4	0	82	2.32811
1	5	21	0	66	2.32757
1	5	11	0	93	2.3273
1	5	28	0	47	2.32676
1	5	18	0	74	2.32649
3	5	8	0	81	2.32622
1	5	15	0	82	2.32541
1	5	15	0	82	2.32541
1	5	15	0	82	2.32541
4	5	5	0	79	2.32514
1	3	5	1	49	2.32514
1	3	5	1	49	2.32514
1	1	5	1	89	2.32514
2	4	22	0	73	2.32459
4	5	2	0	87	2.32405
2	3	2	1	47	2.32405
1	5	19	0	71	2.32351
1	5	19	0	71	2.32351
1	5	19	0	71	2.32351
1	4	19	0	91	2.32351
1	5	9	0	98	2.32324
1	5	16	0	79	2.32243
1	5	16	0	79	2.32243
1	2	6	1	66	2.32216
2	5	6	0	96	2.32216
1	3	6	1	46	2.32216
4	5	3	0	84	2.32108
1	3	3	1	54	2.32108
1	5	20	0	68	2.32054
1	4	20	0	88	2.32054
2	5	10	0	85	2.32027
6	4	10	0	65	2.32027
1	2	7	1	63	2.31919
1	5	14	0	84	2.31838
1	3	4	1	51	2.31811
1	3	4	1	51	2.31811
1	3	4	1	51	2.31811
2	5	11	0	82	2.3173
1	3	1	1	59	2.31703
1	5	18	0	73	2.31649
2	5	8	0	90	2.31622
1	4	25	0	74	2.31568
2	5	15	0	71	2.31541
1	3	5	1	48	2.31514
1	3	5	1	48	2.31514
1	5	22	0	62	2.31459
1	5	22	0	62	2.31459
2	4	22	0	72	2.31459
1	3	2	1	56	2.31405
2	5	19	0	60	2.31351
2	5	9	0	87	2.31324
1	4	26	0	71	2.3127
1	4	26	0	71	2.3127
2	4	16	0	88	2.31243
1	5	16	0	78	2.31243
1	5	16	0	78	2.31243
3	5	6	0	85	2.31216
3	5	6	0	85	2.31216
3	5	6	0	85	2.31216
9	3	3	0	73	2.31108
1	5	20	0	67	2.31054
2	5	10	0	84	2.31027
2	5	10	0	84	2.31027
1	5	27	0	48	2.30973
2	2	7	1	52	2.30919
2	2	7	1	52	2.30919
3	5	7	0	82	2.30919
1	3	7	1	42	2.30919
1	1	7	1	82	2.30919
1	1	7	1	82	2.30919
1	4	24	0	76	2.30865
1	5	14	0	83	2.30838
3	5	4	0	90	2.30811
1	3	4	1	50	2.30811
1	3	4	1	50	2.30811
1	2	4	1	70	2.30811
1	4	31	0	57	2.30784
1	3	31	0	77	2.30784
5	4	11	0	71	2.3073
1	5	18	0	72	2.30649
1	5	8	0	99	2.30622
2	5	8	0	89	2.30622
2	5	8	0	89	2.30622
2	5	8	0	89	2.30622
3	4	15	0	80	2.30541
2	5	15	0	70	2.30541
1	5	15	0	80	2.30541
1	5	15	0	80	2.30541
1	3	32	0	74	2.30486
3	4	12	0	88	2.30432
1	5	12	0	88	2.30432
1	5	12	0	88	2.30432
1	5	12	0	88	2.30432
1	5	12	0	88	2.30432
1	3	2	1	55	2.30405
4	5	2	0	85	2.30405
1	2	2	1	75	2.30405
1	5	19	0	69	2.30351
1	5	9	0	96	2.30324
2	5	9	0	86	2.30324
2	5	9	0	86	2.30324
1	5	16	0	77	2.30243
3	5	6	0	84	2.30216
2	5	6	0	94	2.30216
1	3	6	1	44	2.30216
1	5	23	0	58	2.30162
1	5	13	0	85	2.30135
1	5	13	0	85	2.30135
2	5	10	0	83	2.30027
2	5	10	0	83	2.30027
1	5	24	0	55	2.29865
1	5	14	0	82	2.29838
3	5	4	0	89	2.29811
1	3	4	1	49	2.29811
1	5	21	0	63	2.29757
1	3	28	0	84	2.29676
2	4	18	0	81	2.29649
1	5	18	0	71	2.29649
3	5	8	0	78	2.29622
3	5	8	0	78	2.29622
2	5	8	0	88	2.29622
2	5	8	0	88	2.29622
2	5	8	0	88	2.29622
2	4	25	0	62	2.29568
1	4	25	0	72	2.29568
1	5	15	0	79	2.29541
1	3	5	1	46	2.29514
1	1	5	1	86	2.29514
1	5	22	0	60	2.29459
1	5	12	0	87	2.29432
1	5	12	0	87	2.29432
1	3	29	0	81	2.29378
3	4	19	0	68	2.29351
1	5	19	0	68	2.29351
1	5	19	0	68	2.29351
2	5	9	0	85	2.29324
2	5	9	0	85	2.29324
2	5	9	0	85	2.29324
2	5	9	0	85	2.29324
1	5	9	0	95	2.29324
1	5	16	0	76	2.29243
1	5	16	0	76	2.29243
1	2	6	1	63	2.29216
1	5	23	0	57	2.29162
1	3	3	1	51	2.29108
1	5	20	0	65	2.29054
2	5	10	0	82	2.29027
2	5	10	0	82	2.29027
2	5	10	0	82	2.29027
1	5	10	0	92	2.29027
1	5	10	0	92	2.29027
1	5	27	0	46	2.28973
1	5	7	1		2.28919
1	5	7	1		2.28919
1	4	24	0	74	2.28865
2	1	4	1	78	2.28811
1	3	4	1	48	2.28811
1	5	11	0	89	2.2873
1	5	11	0	89	2.2873
2	5	18	0	60	2.28649
1	5	18	0	70	2.28649
1	5	18	0	70	2.28649
1	5	18	0	70	2.28649
1	5	18	0	70	2.28649
3	5	8	0	77	2.28622
2	5	8	0	87	2.28622
1	5	25	0	51	2.28568
3	5	15	0	58	2.28541
1	5	15	0	78	2.28541
3	5	5	0	85	2.28514
3	3	32	0	52	2.28486
1	5	22	0	59	2.28459
1	5	12	0	86	2.28432
1	5	12	0	86	2.28432
1	5	12	0	86	2.28432
1	3	2	1	53	2.28405
1	3	2	1	53	2.28405
1	5	19	0	67	2.28351
2	5	19	0	57	2.28351
2	5	9	0	84	2.28324
2	5	9	0	84	2.28324
2	5	9	0	84	2.28324
2	5	9	0	84	2.28324
1	5	9	0	94	2.28324
1	5	9	0	94	2.28324
1	5	16	0	75	2.28243
3	5	6	0	82	2.28216
3	5	6	0	82	2.28216
2	4	23	0	66	2.28162
1	5	13	0	83	2.28135
1	5	13	0	83	2.28135
1	3	3	1	50	2.28108
1	3	3	1	50	2.28108
2	5	10	0	81	2.28027
2	5	10	0	81	2.28027
2	5	10	0	81	2.28027
2	5	10	0	81	2.28027
1	5	10	0	91	2.28027
1	5	10	0	91	2.28027
1	2	10	1	51	2.28027
1	5	17	0	72	2.27946
2	5	7	0	89	2.27919
1	5	7	0	99	2.27919
1	1	7	1	79	2.27919
2	5	14	0	70	2.27838
2	5	14	0	70	2.27838
1	5	14	0	80	2.27838
1	5	14	0	80	2.27838
1	5	14	0	80	2.27838
1	5	14	0	80	2.27838
1	5	14	0	80	2.27838
3	5	4	0	87	2.27811
1	5	11	0	88	2.2773
1	5	11	0	88	2.2773
4	3	18	0	79	2.27649
1	5	18	0	69	2.27649
2	5	8	0	86	2.27622
3	3	25	0	70	2.27568
2	5	15	0	67	2.27541
1	5	15	0	77	2.27541
1	5	15	0	77	2.27541
1	4	15	0	97	2.27541
3	5	5	0	84	2.27514
3	5	5	0	84	2.27514
3	5	5	0	84	2.27514
1	1	5	1	84	2.27514
1	5	22	0	58	2.27459
1	5	12	0	85	2.27432
1	3	2	1	52	2.27405
4	5	2	0	82	2.27405
1	3	29	0	79	2.27378
1	5	19	0	66	2.27351
2	5	19	0	56	2.27351
2	5	9	0	83	2.27324
2	5	9	0	83	2.27324
2	5	9	0	83	2.27324
2	5	9	0	83	2.27324
2	5	9	0	83	2.27324
2	5	9	0	83	2.27324
2	5	9	0	83	2.27324
2	5	9	0	83	2.27324
2	5	9	0	83	2.27324
1	4	26	0	67	2.2727
2	5	16	0	64	2.27243
3	5	6	0	81	2.27216
2	5	6	0	91	2.27216
3	4	13	0	82	2.27135
1	5	13	0	82	2.27135
4	5	3	0	79	2.27108
4	5	3	0	79	2.27108
4	4	3	0	99	2.27108
3	5	3	0	89	2.27108
1	3	3	1	49	2.27108
1	3	3	1	49	2.27108
1	2	3	1	69	2.27108
2	5	10	0	80	2.27027
2	5	10	0	80	2.27027
2	5	10	0	80	2.27027
2	5	10	0	80	2.27027
1	5	10	0	90	2.27027
1	5	17	0	71	2.26946
1	5	17	0	71	2.26946
2	5	7	0	88	2.26919
2	5	7	0	88	2.26919
2	5	7	0	88	2.26919
2	5	7	0	88	2.26919
2	5	7	0	88	2.26919
2	5	7	0	88	2.26919
2	5	7	0	88	2.26919
3	5	4	0	86	2.26811
2	1	4	1	76	2.26811
1	4	31	0	53	2.26784
1	5	21	0	60	2.26757
3	5	11	0	67	2.2673
1	5	11	0	87	2.2673
1	5	11	0	87	2.2673
5	3	18	0	68	2.26649
2	5	18	0	58	2.26649
1	5	18	0	68	2.26649
1	5	18	0	68	2.26649
3	5	8	0	75	2.26622
2	5	8	0	85	2.26622
2	5	8	0	85	2.26622
1	5	15	0	76	2.26541
4	1	5	1	53	2.26514
3	5	5	0	83	2.26514
2	5	5	0	93	2.26514
1	4	22	0	77	2.26459
1	5	12	0	84	2.26432
1	5	12	0	84	2.26432
1	5	12	0	84	2.26432
6	3	12	0	74	2.26432
3	5	2	0	91	2.26405
3	5	2	0	91	2.26405
1	3	2	1	51	2.26405
1	3	2	1	51	2.26405
4	5	2	0	81	2.26405
1	3	29	0	78	2.26378
1	3	29	0	78	2.26378
1	5	9	0	92	2.26324
1	2	9	1	52	2.26324
2	5	9	0	82	2.26324
2	5	9	0	82	2.26324
2	5	9	0	82	2.26324
1	5	16	0	73	2.26243
1	5	6	1		2.26216
1	5	6	1		2.26216
3	5	6	0	80	2.26216
2	5	6	0	90	2.26216
2	5	6	0	90	2.26216
2	5	6	0	90	2.26216
1	5	13	0	81	2.26135
1	5	13	0	81	2.26135
1	5	13	0	81	2.26135
1	5	13	0	81	2.26135
4	5	3	0	78	2.26108
1	3	3	1	48	2.26108
1	2	3	1	68	2.26108
1	1	3	1	88	2.26108
1	5	20	0	62	2.26054
1	5	20	0	62	2.26054
5	5	10	0	49	2.26027
2	5	10	0	79	2.26027
1	5	10	0	89	2.26027
1	5	10	0	89	2.26027
1	5	10	0	89	2.26027
1	5	10	0	89	2.26027
1	5	10	0	89	2.26027
1	5	10	0	89	2.26027
2	5	17	0	60	2.25946
2	5	17	0	60	2.25946
1	5	17	0	70	2.25946
1	5	17	0	70	2.25946
2	5	7	0	87	2.25919
2	5	7	0	87	2.25919
2	5	7	0	87	2.25919
2	5	7	0	87	2.25919
1	5	7	0	97	2.25919
1	5	14	0	78	2.25838
1	5	14	0	78	2.25838
3	5	4	0	85	2.25811
3	5	4	0	85	2.25811
3	5	4	0	85	2.25811
2	3	31	0	62	2.25784
1	4	31	0	52	2.25784
1	3	31	0	72	2.25784
1	5	21	0	59	2.25757
1	5	21	0	59	2.25757
1	5	21	0	59	2.25757
1	5	21	0	59	2.25757
1	4	21	0	79	2.25757
1	3	21	0	99	2.25757
2	5	11	0	76	2.2573
2	5	11	0	76	2.2573
2	5	11	0	76	2.2573
1	5	11	0	86	2.2573
1	5	11	0	86	2.2573
1	5	11	0	86	2.2573
1	3	28	0	80	2.25676
3	4	8	0	94	2.25622
2	5	8	0	84	2.25622
1	2	8	1	54	2.25622
1	5	15	0	75	2.25541
3	5	5	0	82	2.25514
3	5	5	0	82	2.25514
2	5	5	0	92	2.25514
7	3	5	0	82	2.25514
1	3	2	1	50	2.25405
6	3	9	0	81	2.25324
2	5	9	0	81	2.25324
1	5	16	0	72	2.25243
1	5	16	0	72	2.25243
2	5	16	0	62	2.25243
2	5	16	0	62	2.25243
3	5	6	0	79	2.25216
1	5	23	0	53	2.25162
1	5	13	0	80	2.25135
1	5	13	0	80	2.25135
1	5	13	0	80	2.25135
1	5	13	0	80	2.25135
1	5	13	0	80	2.25135
3	5	3	0	87	2.25108
1	3	3	1	47	2.25108
1	5	10	0	88	2.25027
1	5	10	0	88	2.25027
1	5	10	0	88	2.25027
1	5	17	0	69	2.24946
1	4	17	0	89	2.24946
2	5	7	0	86	2.24919
2	5	7	0	86	2.24919
2	5	7	0	86	2.24919
2	5	7	0	86	2.24919
2	5	7	0	86	2.24919
1	5	7	0	96	2.24919
1	5	7	0	96	2.24919
2	4	24	0	60	2.24865
1	5	24	0	50	2.24865
1	5	24	0	50	2.24865
1	5	24	0	50	2.24865
1	5	14	0	77	2.24838
1	5	14	0	77	2.24838
3	5	4	0	84	2.24811
1	3	31	0	71	2.24784
1	5	21	0	58	2.24757
1	5	11	0	85	2.2473
1	5	11	0	85	2.2473
2	5	18	0	56	2.24649
1	4	18	0	86	2.24649
1	5	8	0	93	2.24622
1	5	8	0	93	2.24622
2	5	8	0	83	2.24622
2	5	8	0	83	2.24622
2	5	8	0	83	2.24622
1	4	25	0	67	2.24568
5	3	15	0	74	2.24541
1	5	15	0	74	2.24541
3	5	5	0	81	2.24514
3	5	5	0	81	2.24514
2	5	5	0	91	2.24514
1	5	22	0	55	2.24459
3	3	22	0	75	2.24459
2	5	12	0	72	2.24432
1	1	2	1	89	2.24405
5	5	2	0	69	2.24405
1	3	2	1	49	2.24405
1	5	19	0	63	2.24351
1	5	19	0	63	2.24351
1	5	19	0	63	2.24351
1	5	19	0	63	2.24351
1	4	19	0	83	2.24351
1	4	19	0	83	2.24351
1	5	9	0	90	2.24324
1	5	9	0	90	2.24324
1	5	9	0	90	2.24324
2	5	9	0	80	2.24324
2	5	6	0	88	2.24216
2	5	6	0	88	2.24216
2	5	6	0	88	2.24216
1	5	23	0	52	2.24162
3	3	23	0	72	2.24162
2	5	13	0	69	2.24135
1	5	13	0	79	2.24135
1	5	13	0	79	2.24135
3	5	3	0	86	2.24108
3	5	3	0	86	2.24108
1	2	3	1	66	2.24108
1	5	20	0	60	2.24054
1	5	20	0	60	2.24054
1	4	20	0	80	2.24054
1	4	20	0	80	2.24054
1	5	10	0	87	2.24027
1	5	10	0	87	2.24027
1	5	10	0	87	2.24027
1	5	10	0	87	2.24027
1	5	17	0	68	2.23946
1	1	17	1	48	2.23946
2	5	7	0	85	2.23919
2	5	7	0	85	2.23919
2	5	7	0	85	2.23919
2	5	7	0	85	2.23919
2	5	7	0	85	2.23919
2	5	7	0	85	2.23919
2	5	7	0	85	2.23919
1	5	7	0	95	2.23919
1	5	7	0	95	2.23919
1	5	24	0	49	2.23865
1	4	24	0	69	2.23865
1	5	14	0	76	2.23838
3	5	4	0	83	2.23811
3	5	4	0	83	2.23811
2	5	4	0	93	2.23811
1	4	21	0	77	2.23757
1	5	11	0	84	2.2373
1	5	11	0	84	2.2373
1	4	28	0	58	2.23676
1	3	28	0	78	2.23676
1	5	18	0	65	2.23649
1	5	18	0	65	2.23649
1	5	18	0	65	2.23649
1	5	18	0	65	2.23649
2	5	8	0	82	2.23622
2	5	8	0	82	2.23622
2	5	8	0	82	2.23622
2	5	8	0	82	2.23622
1	5	8	0	92	2.23622
1	5	15	0	73	2.23541
1	5	15	0	73	2.23541
3	5	5	0	80	2.23514
2	5	5	0	90	2.23514
1	5	12	0	81	2.23432
1	5	12	0	81	2.23432
1	5	12	0	81	2.23432
1	5	12	0	81	2.23432
1	5	12	0	81	2.23432
1	5	12	0	81	2.23432
5	5	2	0	68	2.23405
3	5	2	0	88	2.23405
2	5	2	0	98	2.23405
2	1	2	1	78	2.23405
1	3	2	1	48	2.23405
1	3	2	1	48	2.23405
1	5	19	0	62	2.23351
1	5	19	0	62	2.23351
1	5	19	0	62	2.23351
1	4	19	0	82	2.23351
1	5	9	0	89	2.23324
1	5	9	0	89	2.23324
1	5	16	0	70	2.23243
1	5	6	0	97	2.23216
2	5	6	0	87	2.23216
2	5	6	0	87	2.23216
2	5	6	0	87	2.23216
2	5	6	0	87	2.23216
1	5	23	0	51	2.23162
1	5	13	0	78	2.23135
1	5	13	0	78	2.23135
3	5	3	0	85	2.23108
3	5	3	0	85	2.23108
3	5	3	0	85	2.23108
2	3	30	0	62	2.23081
1	5	20	0	59	2.23054
1	5	20	0	59	2.23054
1	5	20	0	59	2.23054
1	5	10	0	86	2.23027
1	5	10	0	86	2.23027
1	5	10	0	86	2.23027
2	3	27	0	70	2.22973
1	3	27	0	80	2.22973
1	5	17	0	67	2.22946
1	5	17	0	67	2.22946
2	4	17	0	77	2.22946
4	4	7	0	84	2.22919
1	5	7	0	94	2.22919
2	5	7	0	84	2.22919
2	5	7	0	84	2.22919
2	1	7	1	64	2.22919
2	4	24	0	58	2.22865
3	5	4	0	82	2.22811
3	5	4	0	82	2.22811
3	5	4	0	82	2.22811
1	2	4	1	62	2.22811
1	1	4	1	82	2.22811
1	1	4	1	82	2.22811
1	5	21	0	56	2.22757
1	5	11	0	83	2.2273
1	5	11	0	83	2.2273
1	3	1	1	50	2.22703
2	3	28	0	67	2.22676
2	5	18	0	54	2.22649
1	4	18	0	84	2.22649
2	5	8	0	81	2.22622
1	5	8	0	91	2.22622
1	5	8	0	91	2.22622
1	4	25	0	65	2.22568
2	4	15	0	82	2.22541
1	5	15	0	72	2.22541
1	4	15	0	92	2.22541
1	4	15	0	92	2.22541
2	5	5	0	89	2.22514
1	5	5	0	99	2.22514
1	5	5	0	99	2.22514
1	5	5	0	99	2.22514
1	5	5	0	99	2.22514
1	4	22	0	73	2.22459
2	4	12	0	90	2.22432
1	5	12	0	80	2.22432
1	5	12	0	80	2.22432
1	5	12	0	80	2.22432
1	5	12	0	80	2.22432
3	5	2	0	87	2.22405
3	5	2	0	87	2.22405
2	5	2	0	97	2.22405
1	3	2	1	47	2.22405
1	3	2	1	47	2.22405
1	4	19	0	81	2.22351
1	4	19	0	81	2.22351
1	4	19	0	81	2.22351
4	4	9	0	78	2.22324
1	5	9	0	88	2.22324
1	5	9	0	88	2.22324
1	5	9	0	88	2.22324
1	3	26	0	82	2.2227
2	5	16	0	59	2.22243
1	5	16	0	69	2.22243
1	4	16	0	89	2.22243
2	5	6	0	86	2.22216
2	5	6	0	86	2.22216
2	5	6	0	86	2.22216
2	5	6	0	86	2.22216
2	5	6	0	86	2.22216
1	5	23	0	50	2.22162
1	5	23	0	50	2.22162
1	4	23	0	70	2.22162
1	3	23	0	90	2.22162
4	4	13	0	67	2.22135
2	4	13	0	87	2.22135
1	5	13	0	77	2.22135
3	5	3	0	84	2.22108
3	5	3	0	84	2.22108
3	5	3	0	84	2.22108
1	5	20	0	58	2.22054
3	4	10	0	85	2.22027
2	5	10	0	75	2.22027
1	5	10	0	85	2.22027
1	5	10	0	85	2.22027
1	5	10	0	85	2.22027
1	5	10	0	85	2.22027
1	5	10	0	85	2.22027
1	5	10	0	85	2.22027
1	5	10	0	85	2.22027
2	5	7	0	83	2.21919
2	5	7	0	83	2.21919
2	5	7	0	83	2.21919
2	5	7	0	83	2.21919
2	5	7	0	83	2.21919
2	5	7	0	83	2.21919
2	5	7	0	83	2.21919
2	5	7	0	83	2.21919
1	5	24	0	47	2.21865
3	5	14	0	54	2.21838
2	4	14	0	84	2.21838
8	3	4	0	71	2.21811
3	5	4	0	81	2.21811
3	5	4	0	81	2.21811
2	5	11	0	72	2.2173
1	5	11	0	82	2.2173
1	5	11	0	82	2.2173
1	5	11	0	82	2.2173
1	4	18	0	83	2.21649
1	4	18	0	83	2.21649
3	5	8	0	70	2.21622
1	5	8	0	90	2.21622
1	5	8	0	90	2.21622
1	5	8	0	90	2.21622
1	5	8	0	90	2.21622
1	5	8	0	90	2.21622
1	2	8	1	50	2.21622
1	5	15	0	71	2.21541
1	5	15	0	71	2.21541
4	5	5	0	68	2.21514
3	5	5	0	78	2.21514
3	5	5	0	78	2.21514
2	5	5	0	88	2.21514
2	5	5	0	88	2.21514
2	5	5	0	88	2.21514
2	5	5	0	88	2.21514
1	5	12	0	79	2.21432
3	5	2	0	86	2.21405
3	5	2	0	86	2.21405
3	5	2	0	86	2.21405
3	5	2	0	86	2.21405
3	5	2	0	86	2.21405
1	1	2	1	86	2.21405
1	5	19	0	60	2.21351
1	5	19	0	60	2.21351
1	5	19	0	60	2.21351
1	5	19	0	60	2.21351
1	5	19	0	60	2.21351
1	5	19	0	60	2.21351
2	5	19	0	50	2.21351
2	4	19	0	70	2.21351
2	4	19	0	70	2.21351
1	4	19	0	80	2.21351
3	5	9	0	67	2.21324
3	5	9	0	67	2.21324
3	5	9	0	67	2.21324
2	5	9	0	77	2.21324
1	5	9	0	87	2.21324
1	5	9	0	87	2.21324
1	5	9	0	87	2.21324
1	5	9	0	87	2.21324
1	5	9	0	87	2.21324
1	5	9	0	87	2.21324
1	5	9	0	87	2.21324
1	5	9	0	87	2.21324
1	3	26	0	81	2.2127
1	3	26	0	81	2.2127
2	4	16	0	78	2.21243
1	5	16	0	68	2.21243
1	5	16	0	68	2.21243
1	5	16	0	68	2.21243
2	5	6	0	85	2.21216
2	5	6	0	85	2.21216
2	5	6	0	85	2.21216
2	5	6	0	85	2.21216
2	5	6	0	85	2.21216
2	5	6	0	85	2.21216
2	5	6	0	85	2.21216
1	5	6	0	95	2.21216
1	5	13	0	76	2.21135
3	5	3	0	83	2.21108
3	5	3	0	83	2.21108
3	5	3	0	83	2.21108
1	4	30	0	50	2.21081
1	5	10	0	84	2.21027
1	5	10	0	84	2.21027
1	5	10	0	84	2.21027
1	4	27	0	58	2.20973
1	5	17	0	65	2.20946
1	4	17	0	85	2.20946
4	4	7	0	82	2.20919
4	4	7	0	82	2.20919
4	4	7	0	82	2.20919
1	5	7	0	92	2.20919
1	5	7	0	92	2.20919
1	5	7	0	92	2.20919
1	5	7	0	92	2.20919
1	5	7	0	92	2.20919
2	5	7	0	82	2.20919
2	5	7	0	82	2.20919
2	5	7	0	82	2.20919
2	5	7	0	82	2.20919
2	5	7	0	82	2.20919
2	5	7	0	82	2.20919
1	2	7	1	52	2.20919
1	5	24	0	46	2.20865
3	5	4	0	80	2.20811
1	5	4	1		2.20811
1	5	4	1		2.20811
2	5	4	0	90	2.20811
2	5	4	0	90	2.20811
1	5	21	0	54	2.20757
3	3	21	0	74	2.20757
1	5	11	0	81	2.2073
2	5	18	0	52	2.20649
1	5	18	0	62	2.20649
1	5	18	0	62	2.20649
1	5	18	0	62	2.20649
1	4	18	0	82	2.20649
1	4	18	0	82	2.20649
1	5	8	0	89	2.20622
1	5	8	0	89	2.20622
1	5	8	0	89	2.20622
1	5	8	0	89	2.20622
2	5	8	0	79	2.20622
2	5	8	0	79	2.20622
1	4	25	0	63	2.20568
2	5	15	0	60	2.20541
1	5	15	0	70	2.20541
1	5	15	0	70	2.20541
1	5	15	0	70	2.20541
1	5	15	0	70	2.20541
2	2	5	1	47	2.20514
1	5	5	0	97	2.20514
2	5	5	0	87	2.20514
2	5	5	0	87	2.20514
2	5	5	0	87	2.20514
2	5	5	0	87	2.20514
2	5	5	0	87	2.20514
2	5	5	0	87	2.20514
1	2	5	1	57	2.20514
1	5	12	0	78	2.20432
3	5	2	0	85	2.20405
3	5	2	0	85	2.20405
3	5	2	0	85	2.20405
3	5	2	0	85	2.20405
[truncated: 52,809 more rows]

## Sheet: EMP1
Sampled_Sum of normalized values
3
2.8
2.69
2.63
2.62
2.57
2.5
2.49
2.46
2.44
2.42
2.4
2.4
2.37
2.36
2.36
2.36
2.36
2.36
2.36
2.35
2.34
2.32
2.31
2.31
2.27
2.26
2.26
2.26
2.25
2.25
2.24
2.23
2.22
2.2
2.19
2.17
2.15
2.13
2.13
2.12
2.11
2.1
2.1
2.1
2.09
2.08
2.07
2.07
2.07
2.07
2.06
2.06
2.06
2.05
2.04
2.04
2.03
2.02
2.01
2.01
2.01
2
2
1.99
1.98
1.94
1.94
1.93
1.92
1.82
1.78
1.77
1.7
1.65
1.62
1.61
1.54
1.54
1.54
1.54
1.51
1.45
1.44
1.35
1.34
1.34
1.33
1.31
1.3
1.21
1.15
1.13
1.13
1.11
1.1
1.04
0.94
0.91
0.79
