# Supplementary material for: Unbiased machine learning-assisted approach for conditional discretization of human performances
Source: PeerJ Comput Sci. 2025 Apr 21;11:e2804. doi: 10.7717/peerj-cs.2804 (PMC12190627; doi:10.7717/peerj-cs.2804)
Supplement: Supplemental Information 2 [file peerj-cs-11-2804-s002.xlsx]

## Sheet: WA_Fn-UseC_-HR-Employee-Attriti
Age	Attrition	BusinessTravel	DailyRate	Department	DistanceFromHome	Education	EducationField	EmployeeCount	EmployeeNumber	EnvironmentSatisfaction	Gender	HourlyRate	JobInvolvement	JobLevel	JobRole	JobSatisfaction	MaritalStatus	MonthlyIncome	MonthlyRate	NumCompaniesWorked	Over18	OverTime	PercentSalaryHike	PerformanceRating	RelationshipSatisfaction	StandardHours	StockOptionLevel	TotalWorkingYears	TrainingTimesLastYear	WorkLifeBalance	YearsAtCompany	YearsInCurrentRole	YearsSinceLastPromotion	YearsWithCurrManager
41	Yes	Travel_Rarely	1102	Sales	1	2	Life Sciences	1	1	2	Female	94	3	2	Sales Executive	4	Single	5993	19479	8	Y	Yes	11	3	1	80	0	8	0	1	6	4	0	5
59	No	Travel_Rarely	1324	Research & Development	3	3	Medical	1	10	3	Female	81	4	1	Laboratory Technician	1	Married	2670	9964	4	Y	Yes	20	4	1	80	3	12	3	2	1	0	0	7
30	No	Travel_Rarely	125	Research & Development	9	2	Medical	1	41	4	Male	83	2	1	Laboratory Technician	3	Single	2206	16117	1	Y	No	13	3	1	80	0	10	5	3	10	0	1	0
24	Yes	Travel_Rarely	813	Research & Development	1	3	Medical	1	45	2	Male	61	3	1	Research Scientist	4	Married	2293	3020	2	Y	Yes	16	3	1	80	1	6	2	2	2	0	2	0
35	No	Travel_Rarely	890	Sales	2	3	Marketing	1	49	4	Female	97	3	1	Sales Representative	4	Married	2014	9687	1	Y	No	13	3	1	80	0	2	3	3	2	2	2	2
33	No	Travel_Frequently	1141	Sales	1	3	Life Sciences	1	52	3	Female	42	4	2	Sales Executive	1	Married	5376	3193	2	Y	No	19	3	1	80	2	10	3	3	5	3	1	6
37	No	Travel_Rarely	408	Research & Development	19	2	Life Sciences	1	61	2	Male	73	3	1	Research Scientist	2	Married	3022	10227	4	Y	No	21	4	1	80	0	8	1	3	1	0	0	0
36	Yes	Travel_Rarely	318	Research & Development	9	3	Medical	1	90	4	Male	79	2	1	Research Scientist	3	Married	3388	21777	0	Y	Yes	17	3	1	80	1	2	0	2	1	0	0	0
37	No	Travel_Rarely	397	Research & Development	7	4	Medical	1	102	1	Male	30	3	3	Research Director	3	Single	13664	25258	4	Y	No	13	3	1	80	0	16	3	4	5	2	0	8
35	No	Travel_Rarely	1214	Research & Development	1	3	Medical	1	105	2	Male	30	2	1	Research Scientist	3	Single	2859	26278	1	Y	No	18	3	1	80	0	6	3	3	6	4	0	7
56	No	Travel_Rarely	1400	Research & Development	7	3	Life Sciences	1	112	4	Male	49	1	3	Manufacturing Director	4	Single	7260	21698	4	Y	No	11	3	1	80	0	37	3	2	6	4	0	3
30	No	Travel_Rarely	288	Research & Development	2	3	Life Sciences	1	117	3	Male	99	2	2	Healthcare Representative	4	Married	4152	15830	1	Y	No	19	3	1	80	3	11	3	3	11	10	10	8
32	No	Travel_Rarely	1093	Sales	6	4	Medical	1	125	2	Male	87	3	2	Sales Executive	3	Single	5010	24301	1	Y	No	16	3	1	80	0	12	0	3	11	8	5	3
54	No	Travel_Rarely	1217	Research & Development	2	4	Technical Degree	1	126	1	Female	60	3	3	Research Director	3	Married	13549	24001	9	Y	No	12	3	1	80	1	16	5	1	4	3	0	2
24	No	Travel_Rarely	1353	Sales	3	2	Other	1	128	1	Female	33	3	2	Sales Executive	3	Married	4999	17519	0	Y	No	21	4	1	80	1	4	2	2	3	2	0	3
50	No	Travel_Frequently	1115	Research & Development	1	3	Life Sciences	1	141	1	Female	73	3	5	Research Director	2	Married	18172	9755	3	Y	Yes	19	3	1	80	0	28	1	2	8	3	0	8
37	No	Travel_Rarely	1189	Sales	3	3	Life Sciences	1	152	3	Male	87	3	3	Sales Executive	4	Single	7428	14506	2	Y	No	12	3	1	80	0	12	3	3	5	3	1	5
36	No	Travel_Rarely	922	Research & Development	3	2	Life Sciences	1	155	1	Female	39	3	1	Laboratory Technician	4	Divorced	2835	2561	5	Y	No	22	4	1	80	1	7	2	3	1	0	0	0
33	No	Non-Travel	750	Sales	22	2	Marketing	1	160	3	Male	95	3	2	Sales Executive	2	Married	6146	15480	0	Y	No	13	3	1	80	1	8	2	4	7	7	0	7
56	Yes	Travel_Rarely	441	Research & Development	14	4	Life Sciences	1	161	2	Female	72	3	1	Research Scientist	2	Married	4963	4510	9	Y	Yes	18	3	1	80	3	7	2	3	5	4	4	2
32	Yes	Travel_Rarely	1033	Research & Development	9	3	Medical	1	190	1	Female	41	3	1	Laboratory Technician	1	Single	4200	10224	7	Y	No	22	4	1	80	0	10	2	4	5	4	0	3
40	No	Travel_Frequently	1395	Research & Development	26	3	Medical	1	202	2	Female	54	3	2	Research Scientist	2	Divorced	5605	8504	1	Y	No	11	3	1	80	1	20	2	3	20	7	2	3
35	No	Travel_Rarely	662	Sales	1	5	Marketing	1	204	3	Male	94	3	3	Sales Executive	2	Married	7295	11439	1	Y	No	13	3	1	80	2	10	3	3	10	8	0	11
29	No	Non-Travel	1496	Research & Development	1	1	Technical Degree	1	208	4	Male	41	3	2	Manufacturing Director	3	Married	4319	26283	1	Y	No	13	3	1	80	1	10	1	3	10	7	0	0
40	No	Travel_Rarely	630	Sales	4	4	Marketing	1	215	3	Male	67	2	3	Sales Executive	4	Married	10855	8552	7	Y	No	11	3	1	80	1	15	2	2	12	11	2	3
22	No	Travel_Rarely	1256	Research & Development	19	1	Medical	1	217	3	Male	80	3	1	Research Scientist	4	Married	2323	11992	1	Y	No	24	4	1	80	2	2	6	3	2	2	2	8
41	No	Travel_Rarely	465	Research & Development	14	3	Life Sciences	1	227	1	Male	56	3	1	Research Scientist	3	Divorced	2451	4609	4	Y	No	12	3	1	80	1	13	2	3	9	8	1	7
32	No	Travel_Rarely	120	Research & Development	6	5	Life Sciences	1	231	3	Male	43	3	1	Research Scientist	3	Single	3038	12430	3	Y	No	20	4	1	80	0	8	2	3	5	4	1	2
19	Yes	Travel_Frequently	602	Sales	1	1	Technical Degree	1	235	3	Female	100	1	1	Sales Representative	1	Single	2325	20989	0	Y	No	21	4	1	80	0	1	5	4	0	0	0	17
45	No	Travel_Rarely	1268	Sales	4	2	Life Sciences	1	240	3	Female	30	3	2	Sales Executive	1	Divorced	5006	6319	4	Y	Yes	11	3	1	80	1	9	3	4	5	4	0	1
33	No	Travel_Rarely	134	Research & Development	2	3	Life Sciences	1	242	3	Male	90	3	1	Research Scientist	4	Single	2500	10515	0	Y	No	14	3	1	80	0	4	2	4	3	1	0	0
52	No	Travel_Rarely	699	Research & Development	1	4	Life Sciences	1	259	3	Male	65	2	5	Manager	3	Married	19999	5678	0	Y	No	14	3	1	80	1	34	5	3	33	18	11	3
35	Yes	Travel_Rarely	556	Research & Development	23	2	Life Sciences	1	261	2	Male	50	2	2	Manufacturing Director	3	Married	5916	15497	3	Y	Yes	13	3	1	80	0	8	1	3	1	0	0	8
37	No	Travel_Rarely	290	Research & Development	21	3	Life Sciences	1	267	2	Male	65	4	1	Research Scientist	1	Married	3564	22977	1	Y	Yes	12	3	1	80	1	8	3	2	8	7	1	0
38	No	Travel_Rarely	1084	Research & Development	29	3	Technical Degree	1	273	4	Male	54	3	2	Manufacturing Director	4	Married	6261	4185	3	Y	No	18	3	1	80	1	9	3	1	7	7	1	0
49	No	Non-Travel	1002	Research & Development	18	4	Life Sciences	1	275	4	Male	92	3	2	Manufacturing Director	4	Divorced	6804	23793	1	Y	Yes	15	3	1	80	2	7	0	3	7	7	1	4
22	No	Travel_Rarely	1136	Research & Development	5	3	Life Sciences	1	284	4	Male	60	4	1	Research Scientist	2	Divorced	2328	12392	1	Y	Yes	16	3	1	80	1	4	2	2	4	2	2	2
36	No	Travel_Frequently	635	Research & Development	18	1	Medical	1	286	2	Female	73	3	1	Laboratory Technician	4	Single	2153	7703	1	Y	No	13	3	1	80	0	8	2	3	8	1	1	2
59	No	Travel_Rarely	142	Research & Development	3	3	Life Sciences	1	309	3	Male	70	2	1	Research Scientist	4	Married	2177	8456	3	Y	No	17	3	1	80	1	7	6	3	1	0	0	0
35	No	Travel_Frequently	944	Sales	1	3	Marketing	1	314	3	Female	92	3	3	Sales Executive	3	Single	8789	9096	1	Y	No	14	3	1	80	0	10	3	4	10	7	0	3
33	Yes	Travel_Rarely	465	Research & Development	2	2	Life Sciences	1	328	1	Female	39	3	1	Laboratory Technician	1	Married	2707	21509	7	Y	No	20	4	1	80	0	13	3	4	9	7	1	0
32	No	Travel_Rarely	1401	Sales	4	2	Life Sciences	1	330	3	Female	56	3	1	Sales Representative	2	Married	3931	20990	2	Y	No	11	3	1	80	1	6	5	3	4	3	1	0
32	No	Non-Travel	976	Sales	26	4	Marketing	1	333	3	Male	100	3	2	Sales Executive	4	Married	4465	12069	0	Y	No	18	3	1	80	0	4	2	3	3	2	2	1
41	No	Travel_Rarely	1411	Research & Development	19	2	Life Sciences	1	334	3	Male	36	3	2	Research Scientist	1	Divorced	3072	19877	2	Y	No	16	3	1	80	2	17	2	2	1	0	0	7
40	No	Travel_Rarely	1300	Research & Development	24	2	Technical Degree	1	335	1	Male	62	3	2	Research Scientist	4	Divorced	3319	24447	1	Y	No	17	3	1	80	2	9	3	3	9	8	4	7
31	No	Travel_Frequently	1327	Research & Development	3	4	Medical	1	337	2	Male	73	3	3	Research Director	3	Divorced	13675	13523	9	Y	No	12	3	1	80	1	9	3	3	2	2	2	8
37	No	Travel_Rarely	1017	Research & Development	1	2	Medical	1	340	3	Female	83	2	1	Research Scientist	1	Married	3920	18697	2	Y	No	14	3	1	80	1	17	2	2	3	1	0	7
29	No	Travel_Rarely	665	Research & Development	15	3	Life Sciences	1	346	3	Male	60	3	1	Research Scientist	4	Single	2340	22673	1	Y	No	19	3	1	80	0	6	1	3	6	5	1	0
21	No	Travel_Rarely	996	Research & Development	3	2	Medical	1	379	4	Male	100	2	1	Research Scientist	3	Single	3230	10531	1	Y	No	17	3	1	80	0	3	4	4	3	2	1	8
37	No	Non-Travel	728	Research & Development	1	4	Medical	1	380	1	Female	80	3	3	Research Director	4	Divorced	13603	11677	2	Y	Yes	18	3	1	80	2	15	2	3	5	2	0	1
26	No	Travel_Frequently	1479	Research & Development	1	3	Life Sciences	1	384	3	Female	84	3	2	Manufacturing Director	2	Divorced	6397	26767	1	Y	No	20	4	1	80	1	6	6	1	6	5	1	0
50	No	Travel_Rarely	797	Research & Development	4	1	Life Sciences	1	385	1	Male	96	3	5	Research Director	2	Divorced	19144	15815	3	Y	No	14	3	1	80	2	28	4	2	10	4	1	2
29	No	Travel_Frequently	442	Sales	2	2	Life Sciences	1	388	2	Male	44	3	2	Sales Executive	4	Single	4554	20260	1	Y	No	18	3	1	80	0	10	3	2	10	7	0	3
18	No	Travel_Rarely	812	Sales	10	3	Medical	1	411	4	Female	69	2	1	Sales Representative	3	Single	1200	9724	1	Y	No	12	3	1	80	0	0	2	3	0	0	0	3
39	No	Travel_Rarely	1132	Research & Development	1	3	Medical	1	417	3	Male	48	4	3	Healthcare Representative	4	Divorced	9613	10942	0	Y	No	17	3	1	80	3	19	5	2	18	10	3	0
45	No	Travel_Frequently	1249	Research & Development	7	3	Life Sciences	1	425	1	Male	97	3	3	Laboratory Technician	1	Divorced	5210	20308	1	Y	No	18	3	1	80	1	24	2	3	24	9	9	12
43	No	Travel_Frequently	185	Research & Development	10	4	Life Sciences	1	430	3	Female	33	3	1	Laboratory Technician	4	Single	2455	10675	0	Y	No	19	3	1	80	0	9	5	3	8	7	1	8
52	Yes	Travel_Rarely	723	Research & Development	8	4	Medical	1	433	3	Male	85	2	2	Research Scientist	2	Married	4941	17747	2	Y	No	15	3	1	80	0	11	3	2	8	2	7	2
27	No	Travel_Rarely	1377	Sales	2	3	Life Sciences	1	437	4	Male	74	3	2	Sales Executive	3	Single	4478	5242	1	Y	Yes	11	3	1	80	0	5	3	3	5	4	0	7
31	No	Travel_Frequently	798	Research & Development	7	2	Life Sciences	1	442	3	Female	48	2	3	Manufacturing Director	3	Married	8943	14034	1	Y	No	24	4	1	80	1	10	2	3	10	9	8	7
39	No	Travel_Frequently	672	Research & Development	7	2	Medical	1	444	3	Male	54	2	5	Manager	4	Married	19272	21141	1	Y	No	15	3	1	80	1	21	2	3	21	9	13	8
39	Yes	Travel_Rarely	1162	Sales	3	2	Medical	1	445	4	Female	41	3	2	Sales Executive	3	Married	5238	17778	4	Y	Yes	18	3	1	80	0	12	3	2	1	0	0	9
43	No	Travel_Rarely	1001	Research & Development	7	3	Life Sciences	1	451	3	Female	43	3	3	Healthcare Representative	1	Married	9985	9262	8	Y	No	16	3	1	80	1	10	1	2	1	0	0	8
45	No	Travel_Rarely	549	Research & Development	8	4	Other	1	452	4	Male	75	3	2	Research Scientist	4	Married	3697	9278	9	Y	No	14	3	1	80	2	12	3	3	10	9	9	9
27	No	Travel_Rarely	1130	Sales	8	4	Marketing	1	458	2	Female	56	3	2	Sales Executive	2	Married	6214	3415	1	Y	No	18	3	1	80	1	8	3	3	8	7	0	8
29	No	Travel_Rarely	144	Sales	10	1	Marketing	1	463	4	Female	39	2	2	Sales Executive	2	Divorced	8268	11866	1	Y	Yes	14	3	1	80	2	7	2	3	7	7	1	2
47	No	Travel_Frequently	1309	Sales	4	1	Medical	1	467	2	Male	99	3	2	Sales Representative	3	Single	2976	25751	3	Y	No	19	3	1	80	0	5	3	3	0	0	0	3
29	No	Non-Travel	746	Sales	2	3	Life Sciences	1	469	4	Male	61	3	2	Sales Executive	3	Married	4649	16928	1	Y	No	14	3	1	80	1	4	3	2	4	3	0	0
37	No	Travel_Rarely	1319	Research & Development	6	3	Medical	1	474	3	Male	51	4	2	Research Scientist	1	Divorced	5974	17001	4	Y	Yes	13	3	1	80	2	13	2	3	7	7	6	2
36	No	Travel_Frequently	541	Sales	3	4	Medical	1	481	1	Male	48	2	3	Sales Executive	4	Married	9699	7246	4	Y	No	11	3	1	80	1	16	2	3	13	9	1	0
40	Yes	Travel_Rarely	575	Sales	22	2	Marketing	1	492	3	Male	68	2	2	Sales Executive	3	Married	6380	6110	2	Y	Yes	12	3	1	80	2	8	6	3	6	4	1	3
30	No	Travel_Rarely	202	Sales	2	1	Technical Degree	1	508	3	Male	72	3	1	Sales Representative	2	Married	2476	17434	1	Y	No	18	3	1	80	1	1	3	3	1	0	0	4
34	No	Non-Travel	1381	Sales	4	4	Marketing	1	523	3	Female	72	3	2	Sales Executive	3	Married	6538	12740	9	Y	No	15	3	1	80	1	6	3	3	3	2	1	0
43	No	Travel_Frequently	313	Research & Development	21	3	Medical	1	525	4	Male	61	3	1	Laboratory Technician	4	Married	2258	15238	7	Y	No	20	4	1	80	1	8	1	3	3	2	1	9
37	No	Non-Travel	1063	Research & Development	25	5	Medical	1	529	2	Female	72	3	2	Research Scientist	3	Married	4449	23866	3	Y	Yes	15	3	1	80	2	15	2	3	13	11	10	0
33	Yes	Travel_Rarely	587	Research & Development	10	1	Medical	1	584	1	Male	38	1	1	Laboratory Technician	4	Divorced	3408	6705	7	Y	No	13	3	1	80	3	8	2	3	4	3	1	8
30	No	Travel_Rarely	413	Sales	7	1	Marketing	1	585	4	Male	57	3	1	Sales Representative	2	Single	2983	18398	0	Y	No	14	3	1	80	0	4	3	3	3	2	1	8
31	Yes	Travel_Frequently	534	Research & Development	20	3	Life Sciences	1	587	1	Male	66	3	3	Healthcare Representative	3	Married	9824	22908	3	Y	No	12	3	1	80	0	12	2	3	1	0	0	0
48	No	Travel_Rarely	163	Sales	2	5	Marketing	1	595	2	Female	37	3	2	Sales Executive	4	Married	4051	19658	2	Y	No	14	3	1	80	1	14	2	3	9	7	6	2
39	No	Travel_Frequently	443	Research & Development	8	1	Life Sciences	1	602	3	Female	48	3	1	Laboratory Technician	3	Married	3755	17872	1	Y	No	11	3	1	80	1	8	3	3	8	3	0	2
41	No	Non-Travel	509	Research & Development	2	4	Other	1	616	1	Female	62	2	2	Healthcare Representative	3	Single	6811	2112	2	Y	Yes	17	3	1	80	0	10	3	3	8	7	0	0
26	No	Travel_Rarely	775	Sales	29	2	Medical	1	618	1	Male	45	3	2	Sales Executive	3	Divorced	4306	4267	5	Y	No	12	3	1	80	2	8	5	3	0	0	0	4
48	No	Travel_Rarely	1236	Research & Development	1	4	Life Sciences	1	664	4	Female	40	2	4	Manager	1	Married	15402	17997	7	Y	No	11	3	1	80	1	21	3	1	3	2	0	0
44	No	Travel_Rarely	1315	Research & Development	3	4	Other	1	671	4	Male	35	3	5	Manager	4	Married	19513	9358	4	Y	Yes	12	3	1	80	1	26	2	4	2	2	0	9
29	No	Travel_Rarely	1176	Sales	3	2	Medical	1	690	2	Female	62	3	2	Sales Executive	3	Married	5561	3487	1	Y	No	14	3	1	80	1	6	5	2	6	0	1	3
33	Yes	Travel_Frequently	1076	Research & Development	3	3	Life Sciences	1	702	1	Male	70	3	1	Research Scientist	1	Single	3348	3164	1	Y	Yes	11	3	1	80	0	10	3	3	10	8	9	2
23	No	Travel_Rarely	885	Research & Development	4	3	Medical	1	705	1	Male	58	4	1	Research Scientist	1	Married	2819	8544	2	Y	No	16	3	1	80	1	5	3	4	3	2	0	0
38	No	Travel_Rarely	243	Sales	7	4	Marketing	1	709	4	Female	46	2	2	Sales Executive	4	Single	4028	7791	0	Y	No	20	4	1	80	0	8	2	3	7	7	0	3
37	No	Travel_Rarely	1225	Research & Development	10	2	Life Sciences	1	715	4	Male	80	4	1	Research Scientist	4	Single	4680	15232	3	Y	No	17	3	1	80	0	4	2	3	1	0	0	8
24	Yes	Travel_Rarely	693	Sales	3	2	Life Sciences	1	720	1	Female	65	3	2	Sales Executive	3	Single	4577	24785	9	Y	No	14	3	1	80	0	4	3	3	2	2	2	7
39	No	Travel_Rarely	408	Research & Development	2	4	Technical Degree	1	721	4	Female	80	2	2	Healthcare Representative	3	Single	4553	20978	1	Y	No	11	3	1	80	0	20	4	3	20	7	11	11
50	Yes	Travel_Frequently	562	Sales	8	2	Technical Degree	1	723	2	Male	50	3	2	Sales Executive	3	Married	6796	23452	3	Y	Yes	14	3	1	80	1	18	4	3	4	3	1	0
36	No	Non-Travel	427	Research & Development	8	3	Life Sciences	1	742	1	Female	63	4	3	Research Director	1	Married	11713	20335	9	Y	No	14	3	1	80	1	10	2	3	8	7	0	7
27	No	Travel_Rarely	975	Research & Development	7	3	Medical	1	764	4	Female	55	2	2	Healthcare Representative	1	Single	6811	23398	8	Y	No	19	3	1	80	0	9	2	1	7	6	0	5
35	No	Non-Travel	1225	Research & Development	2	4	Life Sciences	1	771	4	Female	61	3	2	Healthcare Representative	1	Divorced	5093	4761	2	Y	No	11	3	1	80	1	16	2	4	1	0	0	7
52	No	Travel_Rarely	621	Sales	3	4	Marketing	1	776	3	Male	31	2	4	Manager	1	Married	16856	10084	1	Y	No	11	3	1	80	0	34	3	4	34	6	1	3
45	No	Travel_Rarely	954	Sales	2	2	Technical Degree	1	783	2	Male	46	1	2	Sales Representative	3	Single	6632	12388	0	Y	No	13	3	1	80	0	9	3	3	8	7	3	2
52	No	Non-Travel	715	Research & Development	19	4	Medical	1	791	4	Male	41	3	1	Research Scientist	4	Married	4258	26589	0	Y	No	18	3	1	80	1	5	3	3	4	3	1	4
26	No	Travel_Frequently	575	Research & Development	1	2	Life Sciences	1	792	1	Female	71	1	1	Laboratory Technician	4	Divorced	4364	5288	3	Y	No	14	3	1	80	1	5	2	3	2	2	2	8
29	No	Travel_Rarely	657	Research & Development	27	3	Medical	1	793	2	Female	66	3	2	Healthcare Representative	3	Married	4335	25549	4	Y	No	12	3	1	80	1	11	3	2	8	7	1	2
36	No	Travel_Rarely	676	Research & Development	1	3	Other	1	823	3	Female	35	3	2	Manufacturing Director	2	Married	5228	23361	0	Y	No	15	3	1	80	1	10	2	3	9	7	0	2
49	Yes	Travel_Rarely	1184	Sales	11	3	Marketing	1	840	3	Female	43	3	3	Sales Executive	4	Married	7654	5860	1	Y	No	18	3	1	80	2	9	3	4	9	8	7	0
28	No	Travel_Rarely	760	Sales	2	4	Marketing	1	846	2	Female	81	3	2	Sales Executive	2	Married	4779	3698	1	Y	Yes	20	4	1	80	0	8	2	3	8	7	7	0
26	Yes	Travel_Frequently	887	Research & Development	5	2	Medical	1	848	3	Female	88	2	1	Research Scientist	3	Married	2366	20898	1	Y	Yes	14	3	1	80	1	8	2	3	8	7	1	10
33	No	Travel_Rarely	586	Sales	1	3	Medical	1	855	1	Male	48	4	2	Sales Executive	1	Divorced	4037	21816	1	Y	No	22	4	1	80	1	9	5	3	9	8	0	0
22	No	Travel_Rarely	1230	Research & Development	1	2	Life Sciences	1	872	4	Male	33	2	2	Manufacturing Director	4	Married	4775	19146	6	Y	No	22	4	1	80	2	4	2	1	2	2	2	2
35	Yes	Travel_Frequently	130	Research & Development	25	4	Life Sciences	1	881	4	Female	96	3	1	Research Scientist	2	Divorced	2022	16612	1	Y	Yes	19	3	1	80	1	10	3	2	10	2	7	7
25	No	Travel_Rarely	583	Sales	4	1	Marketing	1	885	3	Male	87	2	2	Sales Executive	1	Married	4256	18154	1	Y	No	12	3	1	80	0	5	1	4	5	2	0	3
35	No	Travel_Rarely	672	Research & Development	25	3	Technical Degree	1	899	4	Male	78	2	3	Manufacturing Director	2	Married	10903	9129	3	Y	No	16	3	1	80	0	16	2	3	13	10	4	1
47	No	Travel_Rarely	249	Sales	2	2	Marketing	1	903	3	Female	35	3	2	Sales Executive	4	Married	4537	17783	0	Y	Yes	22	4	1	80	1	8	2	3	7	6	7	0
21	Yes	Travel_Rarely	1427	Research & Development	18	1	Other	1	923	4	Female	65	3	1	Research Scientist	4	Single	2693	8870	1	Y	No	19	3	1	80	0	1	3	2	1	0	0	8
36	No	Travel_Rarely	1425	Research & Development	14	1	Life Sciences	1	924	3	Male	68	3	2	Healthcare Representative	4	Married	6586	4821	0	Y	Yes	17	3	1	80	1	17	2	2	16	8	4	6
47	No	Travel_Rarely	1454	Sales	2	4	Life Sciences	1	925	4	Female	65	2	1	Sales Representative	4	Single	3294	13137	1	Y	Yes	18	3	1	80	0	3	3	2	3	2	1	4
22	Yes	Travel_Rarely	617	Research & Development	3	1	Life Sciences	1	926	2	Female	34	3	2	Manufacturing Director	3	Married	4171	10022	0	Y	Yes	19	3	1	80	1	4	3	4	3	2	0	2
42	No	Travel_Rarely	462	Sales	14	2	Medical	1	936	3	Female	68	2	2	Sales Executive	3	Single	6244	7824	7	Y	No	17	3	1	80	0	10	6	3	5	4	0	0
48	No	Travel_Rarely	1469	Research & Development	20	4	Medical	1	945	4	Male	51	3	1	Research Scientist	3	Married	2259	5543	4	Y	No	17	3	1	80	2	13	2	2	0	0	0	3
36	Yes	Travel_Rarely	530	Sales	3	1	Life Sciences	1	967	3	Male	51	2	3	Sales Executive	4	Married	10325	5518	1	Y	Yes	11	3	1	80	1	16	6	3	16	7	3	8
33	No	Travel_Rarely	1069	Research & Development	1	3	Life Sciences	1	969	2	Female	42	2	2	Healthcare Representative	4	Single	6949	12291	0	Y	No	14	3	1	80	0	6	3	3	5	0	1	8
58	Yes	Travel_Rarely	289	Research & Development	2	3	Technical Degree	1	977	4	Male	51	3	1	Research Scientist	3	Single	2479	26227	4	Y	No	24	4	1	80	0	7	4	3	1	0	0	0
30	No	Travel_Rarely	231	Sales	8	2	Other	1	982	3	Male	62	3	3	Sales Executive	3	Divorced	7264	9977	5	Y	No	11	3	1	80	1	10	2	4	8	4	7	12
31	Yes	Non-Travel	335	Research & Development	9	2	Medical	1	991	3	Male	46	2	1	Research Scientist	1	Single	2321	10322	0	Y	Yes	22	4	1	80	0	4	0	3	3	2	1	9
33	No	Travel_Rarely	461	Research & Development	13	1	Life Sciences	1	995	2	Female	53	3	1	Research Scientist	4	Single	3452	17241	3	Y	No	18	3	1	80	0	5	4	3	3	2	0	7
33	No	Travel_Frequently	827	Research & Development	1	4	Other	1	998	3	Female	84	4	2	Healthcare Representative	2	Married	5488	20161	1	Y	Yes	13	3	1	80	1	6	2	3	6	5	1	3
20	Yes	Travel_Rarely	1097	Research & Development	11	3	Medical	1	1016	4	Female	98	2	1	Research Scientist	1	Single	2600	18275	1	Y	Yes	15	3	1	80	0	1	2	3	1	0	0	15
30	Yes	Travel_Frequently	109	Research & Development	5	3	Medical	1	1017	2	Female	60	3	1	Laboratory Technician	2	Single	2422	25725	0	Y	No	17	3	1	80	0	4	3	3	3	2	1	7
22	No	Travel_Rarely	217	Research & Development	8	1	Life Sciences	1	1019	2	Male	94	1	1	Laboratory Technician	1	Married	2451	6881	1	Y	No	15	3	1	80	1	4	3	2	4	3	1	3
35	No	Travel_Rarely	802	Research & Development	10	3	Other	1	1028	2	Male	45	3	1	Laboratory Technician	4	Divorced	3917	9541	1	Y	No	20	4	1	80	1	3	4	2	3	2	1	6
59	No	Travel_Rarely	715	Research & Development	2	3	Life Sciences	1	1032	3	Female	69	2	4	Manufacturing Director	4	Single	13726	21829	3	Y	Yes	13	3	1	80	0	30	4	3	5	3	4	0
37	Yes	Travel_Rarely	1141	Research & Development	11	2	Medical	1	1033	1	Female	61	1	2	Healthcare Representative	2	Married	4777	14382	5	Y	No	15	3	1	80	0	15	2	1	1	0	0	1
50	No	Non-Travel	145	Sales	1	3	Life Sciences	1	1040	4	Female	95	3	2	Sales Executive	3	Married	6347	24920	0	Y	No	12	3	1	80	1	19	3	3	18	7	0	11
45	No	Travel_Rarely	788	Human Resources	24	4	Medical	1	1049	2	Male	36	3	1	Human Resources	2	Single	2177	8318	1	Y	No	16	3	1	80	0	6	3	3	6	3	0	2
53	No	Travel_Frequently	124	Sales	2	3	Marketing	1	1050	3	Female	38	2	3	Sales Executive	2	Married	7525	23537	2	Y	No	12	3	1	80	1	30	2	3	15	7	6	1
38	No	Travel_Frequently	1186	Research & Development	3	4	Other	1	1060	3	Male	44	3	1	Research Scientist	3	Married	2821	2997	3	Y	No	16	3	1	80	1	8	2	3	2	2	2	2
37	No	Travel_Rarely	124	Research & Development	3	3	Other	1	1062	4	Female	35	3	2	Healthcare Representative	2	Single	4107	13848	3	Y	No	15	3	1	80	0	8	3	2	4	3	0	7
21	Yes	Travel_Rarely	1334	Research & Development	10	3	Life Sciences	1	1079	3	Female	36	2	1	Laboratory Technician	1	Single	1416	17258	1	Y	No	13	3	1	80	0	1	6	2	1	0	1	7
46	No	Travel_Rarely	1003	Research & Development	8	4	Life Sciences	1	1080	4	Female	74	2	2	Research Scientist	1	Divorced	4615	21029	8	Y	Yes	23	4	1	80	3	19	2	3	16	13	1	1
28	Yes	Non-Travel	1366	Research & Development	24	2	Technical Degree	1	1082	2	Male	72	2	3	Healthcare Representative	1	Single	8722	12355	1	Y	No	12	3	1	80	0	10	2	2	10	7	1	3
26	No	Travel_Rarely	192	Research & Development	1	2	Medical	1	1083	1	Male	59	2	1	Laboratory Technician	1	Married	3955	11141	1	Y	No	16	3	1	80	2	6	2	3	5	3	1	9
38	No	Travel_Rarely	330	Research & Development	17	1	Life Sciences	1	1088	3	Female	65	2	3	Healthcare Representative	3	Married	8823	24608	0	Y	No	18	3	1	80	1	20	4	2	19	9	1	2
35	Yes	Travel_Rarely	1204	Sales	4	3	Technical Degree	1	1100	4	Male	86	3	3	Sales Executive	1	Single	9582	10333	0	Y	Yes	22	4	1	80	0	9	2	3	8	7	4	7
28	Yes	Travel_Frequently	1009	Research & Development	1	3	Medical	1	1111	1	Male	45	2	1	Laboratory Technician	2	Divorced	2596	7160	1	Y	No	15	3	1	80	2	1	2	3	1	0	0	4
29	No	Travel_Rarely	1107	Research & Development	28	4	Life Sciences	1	1120	3	Female	93	3	1	Research Scientist	4	Divorced	2514	26968	4	Y	No	22	4	1	80	1	11	1	3	7	5	1	3
40	No	Travel_Rarely	1308	Research & Development	14	3	Medical	1	1128	3	Male	44	2	5	Research Director	3	Single	19626	17544	1	Y	No	14	3	1	80	0	21	2	4	20	7	4	2
36	No	Non-Travel	217	Research & Development	18	4	Life Sciences	1	1133	1	Male	78	3	2	Manufacturing Director	4	Single	7779	23238	2	Y	No	20	4	1	80	0	18	0	3	11	9	0	4
31	No	Travel_Frequently	793	Sales	20	3	Life Sciences	1	1135	3	Male	67	4	1	Sales Representative	4	Married	2791	21981	0	Y	No	12	3	1	80	1	3	4	3	2	2	2	7
28	No	Travel_Rarely	1451	Research & Development	2	1	Life Sciences	1	1136	1	Male	67	2	1	Research Scientist	2	Married	3201	19911	0	Y	No	17	3	1	80	0	6	2	1	5	3	0	2
42	No	Travel_Rarely	188	Research & Development	29	3	Medical	1	1148	2	Male	56	1	2	Laboratory Technician	4	Single	4272	9558	4	Y	No	19	3	1	80	0	16	3	3	1	0	0	2
33	Yes	Travel_Rarely	603	Sales	9	4	Marketing	1	1157	1	Female	77	3	2	Sales Executive	1	Single	8224	18385	0	Y	Yes	17	3	1	80	0	6	3	3	5	2	0	7
41	No	Travel_Rarely	167	Research & Development	12	4	Life Sciences	1	1158	2	Male	46	3	1	Laboratory Technician	4	Married	4766	9051	3	Y	Yes	11	3	1	80	1	6	4	3	1	0	0	4
34	No	Travel_Rarely	1400	Sales	9	1	Life Sciences	1	1163	2	Female	70	3	2	Sales Executive	3	Married	5714	5829	1	Y	No	20	4	1	80	0	6	3	2	6	5	1	0
29	Yes	Travel_Rarely	408	Sales	23	1	Life Sciences	1	1165	4	Female	45	2	3	Sales Executive	1	Married	7336	11162	1	Y	No	13	3	1	80	1	11	3	1	11	8	3	13
30	No	Travel_Rarely	852	Sales	10	3	Marketing	1	1179	3	Male	72	2	2	Sales Executive	3	Married	6578	2706	1	Y	No	18	3	1	80	1	10	3	3	10	3	1	6
29	No	Travel_Rarely	1401	Research & Development	6	1	Medical	1	1192	2	Female	54	3	1	Laboratory Technician	4	Married	3131	26342	1	Y	No	13	3	1	80	1	10	5	3	10	8	0	5
20	No	Travel_Rarely	805	Research & Development	3	3	Life Sciences	1	1198	1	Male	87	2	1	Laboratory Technician	3	Single	3033	12828	1	Y	No	12	3	1	80	0	2	2	2	2	2	1	15
29	No	Travel_Rarely	942	Research & Development	15	1	Life Sciences	1	1202	2	Female	69	1	1	Research Scientist	4	Married	2168	26933	0	Y	Yes	18	3	1	80	1	6	2	2	5	4	1	7
46	No	Travel_Rarely	1402	Sales	2	3	Marketing	1	1204	3	Female	69	3	4	Manager	1	Married	17048	24097	8	Y	No	23	4	1	80	0	28	2	3	26	15	15	9
41	Yes	Non-Travel	906	Research & Development	5	2	Life Sciences	1	1210	1	Male	95	2	1	Research Scientist	1	Divorced	2107	20293	6	Y	No	17	3	1	80	1	5	2	1	1	0	0	0
46	No	Travel_Rarely	1450	Research & Development	15	2	Life Sciences	1	1217	4	Male	52	3	5	Research Director	2	Married	19081	10849	5	Y	No	11	3	1	80	1	25	2	3	4	2	0	0
24	Yes	Travel_Rarely	984	Research & Development	17	2	Life Sciences	1	1219	4	Female	97	3	1	Laboratory Technician	2	Married	2210	3372	1	Y	No	13	3	1	80	1	1	3	1	1	0	0	11
33	No	Travel_Frequently	1146	Sales	25	3	Medical	1	1220	2	Female	82	3	2	Sales Executive	3	Married	4539	4905	1	Y	No	12	3	1	80	1	10	3	2	10	7	0	2
30	No	Travel_Rarely	853	Research & Development	7	4	Life Sciences	1	1224	3	Male	49	3	2	Laboratory Technician	3	Divorced	3491	11309	1	Y	No	13	3	1	80	3	10	4	2	10	7	8	2
42	No	Non-Travel	179	Human Resources	2	5	Medical	1	1231	4	Male	79	4	2	Human Resources	1	Married	6272	12858	7	Y	No	16	3	1	80	1	10	3	4	4	3	0	2
30	No	Travel_Rarely	1465	Research & Development	1	3	Medical	1	1241	4	Male	63	3	1	Research Scientist	2	Married	3579	9369	0	Y	Yes	21	4	1	80	1	12	2	3	11	9	5	2
54	No	Travel_Frequently	966	Research & Development	1	4	Life Sciences	1	1245	4	Female	53	3	3	Manufacturing Director	3	Divorced	10502	9659	7	Y	No	17	3	1	80	1	33	2	1	5	4	1	4
29	No	Travel_Rarely	1010	Research & Development	1	3	Life Sciences	1	1249	1	Female	97	3	1	Research Scientist	4	Divorced	3760	5598	1	Y	No	15	3	1	80	3	3	5	3	3	2	1	1
54	No	Travel_Rarely	685	Research & Development	3	3	Life Sciences	1	1250	4	Male	85	3	4	Research Director	4	Married	17779	23474	3	Y	No	14	3	1	80	0	36	2	3	10	9	0	4
45	Yes	Travel_Rarely	1449	Sales	2	3	Marketing	1	1277	1	Female	94	1	5	Manager	2	Single	18824	2493	2	Y	Yes	16	3	1	80	0	26	2	3	24	10	1	8
51	No	Travel_Frequently	237	Sales	9	3	Life Sciences	1	1282	4	Male	83	3	5	Manager	2	Divorced	19847	19196	4	Y	Yes	24	4	1	80	1	31	5	2	29	10	11	4
29	Yes	Travel_Rarely	806	Research & Development	7	3	Technical Degree	1	1299	2	Female	39	3	1	Laboratory Technician	3	Divorced	3339	17285	3	Y	Yes	13	3	1	80	2	10	2	3	7	7	7	7
32	Yes	Travel_Rarely	1089	Research & Development	7	2	Life Sciences	1	1309	4	Male	79	3	2	Laboratory Technician	3	Married	4883	22845	1	Y	No	18	3	1	80	1	10	3	3	10	4	1	4
39	Yes	Travel_Rarely	360	Research & Development	23	3	Medical	1	1310	3	Male	93	3	1	Research Scientist	1	Single	3904	22154	0	Y	No	13	3	1	80	0	6	2	3	5	2	0	1
30	No	Travel_Rarely	1138	Research & Development	6	3	Technical Degree	1	1311	1	Female	48	2	2	Laboratory Technician	4	Married	4627	23631	0	Y	No	12	3	1	80	1	10	6	3	9	2	6	0
36	No	Travel_Rarely	325	Research & Development	10	4	Technical Degree	1	1312	4	Female	63	3	3	Healthcare Representative	3	Married	7094	5747	3	Y	No	12	3	1	80	0	10	0	3	7	7	1	2
28	No	Non-Travel	1476	Research & Development	1	3	Life Sciences	1	1315	3	Female	55	1	2	Laboratory Technician	4	Married	6674	16392	0	Y	No	11	3	1	80	3	10	6	3	9	8	7	10
39	No	Travel_Rarely	524	Research & Development	18	2	Life Sciences	1	1322	1	Male	32	3	2	Manufacturing Director	3	Single	4534	13352	0	Y	No	11	3	1	80	0	9	6	3	8	7	1	3
31	No	Non-Travel	587	Sales	2	4	Life Sciences	1	1324	4	Female	57	3	3	Sales Executive	3	Divorced	9852	8935	1	Y	Yes	19	3	1	80	1	10	5	2	10	8	9	2
41	No	Non-Travel	256	Sales	10	2	Medical	1	1329	3	Male	40	1	2	Sales Executive	2	Single	6151	22074	1	Y	No	13	3	1	80	0	19	4	3	19	2	11	2
31	Yes	Travel_Frequently	1060	Sales	1	3	Life Sciences	1	1331	4	Female	54	3	1	Sales Representative	2	Single	2302	8319	1	Y	Yes	11	3	1	80	0	3	2	4	3	2	2	0
56	No	Travel_Rarely	206	Human Resources	8	4	Life Sciences	1	1338	4	Male	99	3	5	Manager	2	Single	19717	4022	6	Y	No	14	3	1	80	0	36	4	3	7	3	7	7
56	No	Travel_Rarely	1369	Research & Development	23	3	Life Sciences	1	1373	4	Male	68	3	4	Manufacturing Director	2	Married	13402	18235	4	Y	Yes	12	3	1	80	1	33	0	3	19	16	15	1
34	No	Travel_Rarely	285	Research & Development	29	3	Medical	1	1377	2	Male	86	3	2	Laboratory Technician	3	Married	5429	17491	4	Y	No	13	3	1	80	2	10	1	3	8	7	7	2
41	No	Travel_Frequently	1200	Research & Development	22	3	Life Sciences	1	1392	4	Female	75	3	2	Research Scientist	4	Divorced	5467	13953	3	Y	Yes	14	3	1	80	2	12	4	2	6	2	3	2
33	No	Travel_Frequently	1111	Sales	5	1	Life Sciences	1	1395	2	Male	61	3	2	Sales Executive	4	Married	9998	19293	6	Y	No	13	3	1	80	0	8	2	4	5	4	1	2
32	No	Travel_Rarely	499	Sales	2	1	Marketing	1	1396	3	Male	36	3	2	Sales Executive	2	Married	4078	20497	0	Y	Yes	13	3	1	80	3	4	3	2	3	2	1	2
43	No	Travel_Rarely	930	Research & Development	6	3	Medical	1	1402	1	Female	73	2	2	Research Scientist	3	Single	4081	20003	1	Y	Yes	14	3	1	80	0	20	3	1	20	7	1	3
37	No	Travel_Rarely	1462	Research & Development	11	3	Medical	1	1411	1	Female	94	3	1	Laboratory Technician	3	Single	3629	19106	4	Y	No	18	3	1	80	0	8	6	3	3	2	0	6
29	No	Travel_Rarely	332	Human Resources	17	3	Other	1	1419	2	Male	51	2	3	Human Resources	1	Single	7988	9769	1	Y	No	13	3	1	80	0	10	3	2	10	9	0	9
49	Yes	Travel_Frequently	1475	Research & Development	28	2	Life Sciences	1	1420	1	Male	97	2	2	Laboratory Technician	1	Single	4284	22710	3	Y	No	20	4	1	80	0	20	2	3	4	3	1	15
29	Yes	Travel_Frequently	337	Research & Development	14	1	Other	1	1421	3	Female	84	3	3	Healthcare Representative	4	Single	7553	22930	0	Y	Yes	12	3	1	80	0	9	1	3	8	7	7	9
36	No	Travel_Rarely	329	Sales	16	4	Marketing	1	1436	3	Female	98	2	2	Sales Executive	1	Married	5647	13494	4	Y	No	13	3	1	80	2	11	3	2	3	2	0	0
25	Yes	Travel_Rarely	383	Sales	9	2	Life Sciences	1	1439	1	Male	68	2	1	Sales Representative	1	Married	4400	15182	3	Y	No	12	3	1	80	0	6	2	3	3	2	2	9
37	No	Non-Travel	1413	Research & Development	5	2	Technical Degree	1	1440	3	Male	84	4	1	Laboratory Technician	3	Single	3500	25470	0	Y	No	14	3	1	80	0	7	2	1	6	5	1	3
34	No	Travel_Rarely	401	Research & Development	1	3	Life Sciences	1	1447	4	Female	86	2	1	Laboratory Technician	2	Married	3294	3708	5	Y	No	17	3	1	80	1	7	2	2	5	4	0	1
41	No	Travel_Rarely	1283	Research & Development	5	5	Medical	1	1448	2	Male	90	4	1	Research Scientist	3	Married	2127	5561	2	Y	Yes	12	3	1	80	0	7	5	2	4	2	0	2
31	No	Travel_Rarely	326	Sales	8	2	Life Sciences	1	1453	1	Male	31	3	3	Sales Executive	4	Divorced	10793	8386	1	Y	No	18	3	1	80	1	13	5	3	13	7	9	8
46	Yes	Travel_Rarely	377	Sales	9	3	Marketing	1	1457	1	Male	52	3	3	Sales Executive	4	Divorced	10096	15986	4	Y	No	11	3	1	80	1	28	1	4	7	7	4	7
31	Yes	Travel_Frequently	1445	Research & Development	1	5	Life Sciences	1	1459	3	Female	100	4	3	Manufacturing Director	2	Single	7446	8931	1	Y	No	11	3	1	80	0	10	2	3	10	8	4	2
48	No	Travel_Rarely	1221	Sales	7	3	Marketing	1	1466	3	Male	96	3	2	Sales Executive	1	Divorced	5486	24795	4	Y	No	11	3	1	80	3	15	3	3	2	2	2	2
33	No	Travel_Frequently	430	Sales	7	3	Medical	1	1477	4	Male	54	3	2	Sales Executive	1	Married	4373	17456	0	Y	No	14	3	1	80	2	5	2	3	4	3	0	0
57	No	Travel_Rarely	405	Research & Development	1	2	Life Sciences	1	1483	2	Male	93	4	2	Research Scientist	3	Married	4900	2721	0	Y	No	24	4	1	80	1	13	2	2	12	9	2	7
29	Yes	Travel_Frequently	115	Sales	13	3	Technical Degree	1	1487	1	Female	51	3	2	Sales Executive	2	Single	5765	17485	5	Y	No	11	3	1	80	0	7	4	1	5	3	0	0
35	No	Travel_Rarely	660	Sales	7	1	Life Sciences	1	1492	4	Male	76	3	1	Sales Representative	3	Married	2404	16192	1	Y	No	13	3	1	80	1	1	3	3	1	0	0	7
30	No	Travel_Rarely	330	Human Resources	1	3	Life Sciences	1	1499	3	Male	46	3	1	Human Resources	3	Divorced	2064	15428	0	Y	No	21	4	1	80	1	6	3	4	5	3	1	0
49	No	Travel_Rarely	271	Research & Development	3	2	Medical	1	1509	3	Female	43	2	2	Laboratory Technician	1	Married	4789	23070	4	Y	No	25	4	1	80	1	10	3	3	3	2	1	7
33	No	Travel_Rarely	516	Research & Development	8	5	Life Sciences	1	1515	4	Male	69	3	2	Healthcare Representative	3	Single	6388	22049	2	Y	Yes	17	3	1	80	0	14	6	3	0	0	0	0
54	No	Travel_Frequently	1050	Research & Development	11	4	Medical	1	1520	2	Female	87	3	4	Manager	4	Divorced	16032	24456	3	Y	No	20	4	1	80	1	26	2	3	14	9	1	9
31	Yes	Travel_Frequently	561	Research & Development	3	3	Life Sciences	1	1537	4	Female	33	3	1	Research Scientist	3	Single	4084	4156	1	Y	No	12	3	1	80	0	7	2	1	7	2	7	2
37	No	Travel_Rarely	674	Research & Development	13	3	Medical	1	1543	1	Male	47	3	2	Research Scientist	4	Married	4285	3031	1	Y	No	17	3	1	80	0	10	2	3	10	8	3	7
45	No	Travel_Rarely	538	Research & Development	1	4	Technical Degree	1	1553	1	Male	66	3	3	Healthcare Representative	2	Divorced	7441	20933	1	Y	No	12	3	1	80	3	10	4	3	10	8	7	2
35	No	Travel_Rarely	1402	Sales	28	4	Life Sciences	1	1554	2	Female	98	2	1	Sales Representative	3	Married	2430	26204	0	Y	No	23	4	1	80	2	6	5	3	5	3	4	3
32	No	Travel_Rarely	824	Research & Development	5	2	Life Sciences	1	1555	4	Female	67	2	2	Research Scientist	2	Married	5878	15624	3	Y	No	12	3	1	80	1	12	2	3	7	1	2	8
29	No	Travel_Rarely	598	Research & Development	9	3	Life Sciences	1	1558	3	Male	91	4	1	Research Scientist	3	Married	2451	22376	6	Y	No	18	3	1	80	2	5	2	2	1	0	0	8
38	Yes	Travel_Rarely	903	Research & Development	2	3	Medical	1	1573	3	Male	81	3	2	Manufacturing Director	2	Married	4855	7653	4	Y	No	11	3	1	80	2	7	2	3	5	2	1	7
26	No	Travel_Rarely	474	Research & Development	3	3	Life Sciences	1	1581	1	Female	89	3	1	Research Scientist	4	Married	2061	11133	1	Y	No	21	4	1	80	0	1	5	3	1	0	0	7
36	No	Travel_Rarely	884	Sales	1	4	Life Sciences	1	1585	2	Female	73	3	2	Sales Executive	3	Single	6815	21447	6	Y	No	13	3	1	80	0	15	5	3	1	0	0	4
39	No	Travel_Rarely	1462	Sales	6	3	Medical	1	1588	4	Male	38	4	3	Sales Executive	3	Married	8237	4658	2	Y	No	11	3	1	80	1	11	3	3	7	6	7	0
45	No	Travel_Rarely	1015	Research & Development	5	5	Medical	1	1611	3	Female	50	1	2	Laboratory Technician	1	Single	5769	23447	1	Y	Yes	14	3	1	80	0	10	3	3	10	7	1	1
45	No	Non-Travel	336	Sales	26	3	Marketing	1	1612	1	Male	52	2	2	Sales Executive	1	Married	4385	24162	1	Y	No	15	3	1	80	1	10	2	3	10	7	4	5
34	No	Travel_Frequently	426	Research & Development	10	4	Life Sciences	1	1615	3	Male	42	4	2	Manufacturing Director	4	Divorced	4724	17000	1	Y	No	13	3	1	80	1	9	3	3	9	7	7	8
27	No	Travel_Rarely	1302	Research & Development	19	3	Other	1	1619	4	Male	67	2	1	Laboratory Technician	1	Divorced	4066	16290	1	Y	No	11	3	1	80	2	7	3	3	7	7	0	5
37	No	Travel_Rarely	671	Research & Development	19	3	Life Sciences	1	1631	3	Male	85	3	2	Manufacturing Director	3	Married	5768	26493	3	Y	No	17	3	1	80	3	9	2	2	4	3	0	7
45	No	Travel_Rarely	1329	Research & Development	2	2	Other	1	1635	4	Female	59	2	2	Manufacturing Director	4	Divorced	5770	5388	1	Y	No	19	3	1	80	2	10	3	3	10	7	3	1
37	No	Travel_Rarely	1470	Research & Development	10	3	Medical	1	1640	2	Female	71	3	1	Research Scientist	2	Married	3936	9953	1	Y	No	11	3	1	80	1	8	2	1	8	4	7	7
27	No	Travel_Rarely	486	Research & Development	8	3	Medical	1	1647	2	Female	86	4	1	Research Scientist	3	Married	3517	22490	7	Y	No	17	3	1	80	0	5	0	3	3	2	0	13
20	No	Travel_Rarely	1141	Sales	2	3	Medical	1	1657	3	Female	31	3	1	Sales Representative	3	Single	2783	13251	1	Y	No	19	3	1	80	0	2	3	3	2	2	2	4
36	No	Travel_Rarely	1040	Research & Development	3	2	Life Sciences	1	1664	4	Male	79	4	2	Healthcare Representative	1	Divorced	6842	26308	6	Y	No	20	4	1	80	1	13	3	3	5	4	0	0
43	No	Travel_Rarely	1291	Research & Development	15	2	Life Sciences	1	1666	3	Male	65	2	4	Research Director	3	Married	17603	3525	1	Y	No	24	4	1	80	1	14	3	3	14	10	6	8
35	Yes	Travel_Frequently	880	Sales	12	4	Other	1	1667	4	Male	36	3	2	Sales Executive	4	Single	4581	10414	3	Y	Yes	24	4	1	80	0	13	2	4	11	9	6	1
31	No	Travel_Rarely	1112	Sales	5	4	Life Sciences	1	1673	1	Female	67	3	2	Sales Executive	4	Married	5476	22589	1	Y	No	11	3	1	80	2	10	2	3	10	0	0	8
49	No	Travel_Rarely	809	Research & Development	1	3	Life Sciences	1	1677	3	Male	36	3	4	Manager	3	Single	15379	22384	4	Y	No	14	3	1	80	0	23	2	3	8	7	0	1
20	No	Travel_Rarely	727	Sales	9	1	Life Sciences	1	1680	4	Male	54	3	1	Sales Representative	1	Single	2728	21082	1	Y	No	11	3	1	80	0	2	3	3	2	2	0	2
44	No	Travel_Rarely	528	Human Resources	1	3	Life Sciences	1	1683	3	Female	44	3	1	Human Resources	4	Divorced	3195	4167	4	Y	Yes	18	3	1	80	3	8	2	3	2	2	2	15
23	Yes	Travel_Rarely	1320	Research & Development	8	1	Medical	1	1684	4	Male	93	2	1	Laboratory Technician	3	Single	3989	20586	1	Y	Yes	11	3	1	80	0	5	2	3	5	4	1	2
32	Yes	Travel_Rarely	1259	Research & Development	2	4	Life Sciences	1	1692	4	Male	95	3	1	Laboratory Technician	2	Single	1393	24852	1	Y	No	12	3	1	80	0	1	2	3	1	0	0	6
43	No	Travel_Rarely	1179	Sales	2	3	Medical	1	1706	4	Male	73	3	2	Sales Executive	4	Married	7847	6069	1	Y	Yes	17	3	1	80	1	10	3	3	10	9	8	4
32	No	Travel_Frequently	585	Research & Development	10	3	Life Sciences	1	1720	1	Male	56	3	1	Research Scientist	3	Married	3433	17360	6	Y	No	13	3	1	80	1	10	3	2	5	2	1	9
30	No	Travel_Rarely	979	Sales	15	2	Marketing	1	1754	3	Male	94	2	3	Sales Executive	1	Divorced	7140	3088	2	Y	No	11	3	1	80	1	12	2	3	7	7	1	7
34	No	Travel_Rarely	181	Research & Development	2	4	Medical	1	1755	4	Male	97	4	1	Research Scientist	4	Married	2932	5586	0	Y	Yes	14	3	1	80	3	6	3	3	5	0	1	12
31	Yes	Travel_Rarely	1079	Sales	16	4	Marketing	1	1761	1	Male	70	3	3	Sales Executive	3	Married	8161	19002	2	Y	No	13	3	1	80	3	10	2	3	1	0	0	2
34	No	Travel_Rarely	511	Sales	3	2	Life Sciences	1	1779	4	Female	32	1	2	Sales Executive	4	Single	6029	25353	5	Y	No	12	3	1	80	0	6	3	3	2	2	2	2
31	No	Travel_Rarely	196	Sales	29	4	Marketing	1	1784	1	Female	91	2	2	Sales Executive	4	Married	5468	13402	1	Y	No	14	3	1	80	2	13	3	3	12	7	5	2
37	No	Travel_Rarely	589	Sales	9	2	Marketing	1	1787	2	Male	46	2	2	Sales Executive	2	Married	4189	8800	1	Y	No	14	3	1	80	2	5	2	3	5	2	0	2
41	No	Travel_Rarely	447	Research & Development	5	3	Life Sciences	1	1814	2	Male	85	4	2	Healthcare Representative	2	Single	6870	15530	3	Y	No	12	3	1	80	0	11	3	1	3	2	1	0
38	No	Travel_Rarely	723	Sales	2	4	Marketing	1	1835	2	Female	77	1	2	Sales Representative	4	Married	5405	4244	2	Y	Yes	20	4	1	80	2	20	4	2	4	2	0	7
26	No	Travel_Rarely	572	Sales	10	3	Medical	1	1836	3	Male	46	3	2	Sales Executive	4	Single	4684	9125	1	Y	No	13	3	1	80	0	5	4	3	5	3	1	7
22	Yes	Travel_Rarely	391	Research & Development	7	1	Life Sciences	1	1878	4	Male	75	3	1	Research Scientist	2	Single	2472	26092	1	Y	Yes	23	4	1	80	0	1	2	3	1	0	0	2
36	No	Travel_Rarely	1266	Sales	10	4	Technical Degree	1	1880	2	Female	63	2	2	Sales Executive	3	Married	5673	6060	1	Y	Yes	13	3	1	80	1	10	4	3	10	9	1	2
31	No	Travel_Rarely	311	Research & Development	20	3	Life Sciences	1	1881	2	Male	89	3	2	Laboratory Technician	3	Divorced	4197	18624	1	Y	No	11	3	1	80	1	10	2	3	10	8	0	9
40	No	Travel_Rarely	1137	Research & Development	1	4	Life Sciences	1	1892	1	Male	98	3	4	Manager	1	Divorced	16823	18991	2	Y	No	11	3	1	80	1	22	3	3	19	7	11	2
26	No	Travel_Frequently	1096	Research & Development	6	3	Other	1	1918	3	Male	61	4	1	Laboratory Technician	4	Married	2544	7102	0	Y	No	18	3	1	80	1	8	3	3	7	7	7	2
32	Yes	Travel_Frequently	238	Research & Development	5	2	Life Sciences	1	1939	1	Female	47	4	1	Research Scientist	3	Single	2432	15318	3	Y	Yes	14	3	1	80	0	8	2	3	4	1	0	0
27	Yes	Travel_Frequently	1337	Human Resources	22	3	Human Resources	1	1944	1	Female	58	2	1	Human Resources	2	Married	2863	19555	1	Y	No	12	3	1	80	0	1	2	3	1	0	0	8
34	No	Travel_Rarely	937	Sales	1	3	Marketing	1	1950	1	Male	32	3	3	Sales Executive	4	Single	9888	6770	1	Y	No	21	4	1	80	0	14	3	2	14	8	2	5
29	No	Travel_Rarely	136	Research & Development	1	3	Life Sciences	1	1954	1	Male	89	3	2	Healthcare Representative	1	Married	5373	6225	0	Y	No	12	3	1	80	1	6	5	2	5	3	0	2
28	Yes	Travel_Rarely	1404	Research & Development	17	3	Technical Degree	1	1960	3	Male	32	2	1	Laboratory Technician	4	Divorced	2367	18779	5	Y	No	12	3	1	80	1	6	2	2	4	1	0	2
38	No	Travel_Rarely	1404	Sales	1	3	Life Sciences	1	1961	1	Male	59	2	1	Sales Representative	1	Single	2858	11473	4	Y	No	14	3	1	80	0	20	3	2	1	0	0	2
27	No	Travel_Rarely	954	Sales	9	3	Marketing	1	1965	4	Male	44	3	2	Sales Executive	4	Single	4105	5099	1	Y	No	14	3	1	80	0	7	5	3	7	7	0	8
55	No	Travel_Rarely	189	Human Resources	26	4	Human Resources	1	1973	3	Male	71	4	5	Manager	2	Married	19636	25811	4	Y	Yes	18	3	1	80	1	35	0	3	10	9	1	9
39	No	Travel_Rarely	119	Sales	15	4	Marketing	1	1975	2	Male	77	3	4	Sales Executive	1	Single	13341	25098	0	Y	No	12	3	1	80	0	21	3	3	20	8	11	0
40	No	Travel_Frequently	692	Research & Development	11	3	Technical Degree	1	1985	4	Female	73	3	2	Laboratory Technician	3	Married	6323	26849	1	Y	No	11	3	1	80	1	10	2	4	10	9	9	4
38	No	Travel_Rarely	1321	Sales	1	4	Life Sciences	1	1995	4	Male	86	3	2	Sales Executive	2	Married	4440	7636	0	Y	No	15	3	1	80	2	16	3	3	15	13	5	3
41	No	Travel_Rarely	642	Research & Development	1	3	Life Sciences	1	1999	4	Male	76	3	1	Research Scientist	4	Married	2782	21412	3	Y	No	22	4	1	80	1	12	3	3	5	3	1	5
47	No	Non-Travel	1162	Research & Development	1	1	Medical	1	2000	3	Female	98	3	3	Research Director	2	Married	11957	17231	0	Y	No	18	3	1	80	2	14	3	1	13	8	5	4
33	No	Travel_Rarely	501	Research & Development	15	2	Medical	1	2009	2	Female	95	3	2	Healthcare Representative	4	Married	4878	21653	0	Y	Yes	13	3	1	80	1	10	6	3	9	7	8	7
39	No	Travel_Rarely	116	Research & Development	24	1	Life Sciences	1	2014	1	Male	52	3	2	Research Scientist	4	Single	4108	5340	7	Y	No	13	3	1	80	0	18	2	3	7	7	1	0
38	No	Travel_Rarely	201	Research & Development	10	3	Medical	1	2015	2	Female	99	1	3	Research Director	3	Married	13206	3376	3	Y	No	12	3	1	80	1	20	3	3	18	16	1	0
37	No	Travel_Rarely	161	Research & Development	10	3	Life Sciences	1	2017	3	Female	42	4	3	Research Director	4	Married	13744	15471	1	Y	Yes	25	4	1	80	1	16	2	3	16	11	6	8
23	Yes	Travel_Frequently	638	Sales	9	3	Marketing	1	2023	4	Male	33	3	1	Sales Representative	1	Married	1790	26956	1	Y	No	19	3	1	80	1	1	3	2	1	0	1	5
56	No	Non-Travel	667	Research & Development	1	4	Life Sciences	1	2026	3	Male	57	3	2	Healthcare Representative	3	Divorced	6306	26236	1	Y	No	21	4	1	80	1	13	2	2	13	12	1	10
42	No	Travel_Rarely	300	Research & Development	2	3	Life Sciences	1	2031	1	Male	56	3	5	Manager	3	Married	18880	17312	5	Y	No	11	3	1	80	0	24	2	2	22	6	4	11
36	No	Non-Travel	301	Sales	15	4	Marketing	1	2036	4	Male	88	1	2	Sales Executive	4	Divorced	5406	10436	1	Y	No	24	4	1	80	1	15	4	2	15	12	11	13
36	No	Travel_Rarely	1120	Sales	11	4	Marketing	1	2045	2	Female	100	2	2	Sales Executive	4	Married	6652	14369	4	Y	No	13	3	1	80	1	8	2	2	6	3	0	9
29	No	Travel_Rarely	1378	Research & Development	13	2	Other	1	2053	4	Male	46	2	2	Laboratory Technician	2	Married	4025	23679	4	Y	Yes	13	3	1	80	1	10	2	3	4	3	0	4
39	No	Travel_Rarely	722	Sales	24	1	Marketing	1	2056	2	Female	60	2	4	Sales Executive	4	Married	12031	8828	0	Y	No	11	3	1	80	1	21	2	2	20	9	9	1
39	No	Travel_Rarely	613	Research & Development	6	1	Medical	1	2062	4	Male	42	2	3	Healthcare Representative	1	Married	9991	21457	4	Y	No	15	3	1	80	1	9	5	3	7	7	1	0
34	No	Travel_Rarely	628	Research & Development	8	3	Medical	1	2068	2	Male	82	4	2	Laboratory Technician	3	Married	4404	10228	2	Y	No	12	3	1	80	0	6	3	4	4	3	1	2
37	Yes	Travel_Rarely	1373	Research & Development	2	2	Other	1	4	4	Male	92	2	1	Laboratory Technician	3	Single	2090	2396	6	Y	Yes	15	3	2	80	0	7	3	3	0	0	0	2
30	No	Travel_Rarely	1358	Research & Development	24	1	Life Sciences	1	11	4	Male	67	3	1	Laboratory Technician	3	Divorced	2693	13335	1	Y	No	22	4	2	80	1	1	2	3	1	0	0	7
38	No	Travel_Frequently	216	Research & Development	23	3	Life Sciences	1	12	4	Male	44	2	3	Manufacturing Director	3	Single	9526	8787	0	Y	No	21	4	2	80	0	10	2	3	9	7	1	4
36	No	Travel_Rarely	1299	Research & Development	27	3	Medical	1	13	3	Male	94	3	2	Healthcare Representative	3	Married	5237	16577	6	Y	No	13	3	2	80	2	17	3	2	7	7	7	6
28	Yes	Travel_Rarely	103	Research & Development	24	3	Life Sciences	1	19	3	Male	50	2	1	Laboratory Technician	3	Single	2028	12947	5	Y	Yes	14	3	2	80	0	6	4	3	4	2	0	3
22	No	Non-Travel	1123	Research & Development	16	2	Medical	1	22	4	Male	96	4	1	Laboratory Technician	4	Divorced	2935	7324	1	Y	Yes	13	3	2	80	2	1	2	2	1	0	0	6
36	Yes	Travel_Rarely	1218	Sales	9	4	Life Sciences	1	27	3	Male	82	2	1	Sales Representative	1	Single	3407	6986	7	Y	No	23	4	2	80	0	10	4	3	5	3	0	9
32	Yes	Travel_Frequently	1125	Research & Development	16	1	Life Sciences	1	33	2	Female	72	1	1	Research Scientist	1	Single	3919	4681	1	Y	Yes	22	4	2	80	0	10	5	3	10	2	6	8
32	No	Travel_Rarely	427	Research & Development	1	3	Medical	1	78	1	Male	33	3	2	Manufacturing Director	4	Married	6162	10877	1	Y	Yes	22	4	2	80	1	9	3	3	9	8	7	3
36	No	Travel_Rarely	1223	Research & Development	8	3	Technical Degree	1	83	3	Female	59	3	3	Healthcare Representative	3	Divorced	10096	8202	1	Y	No	13	3	2	80	3	17	2	3	17	14	12	7
31	No	Travel_Rarely	1082	Research & Development	1	4	Medical	1	95	3	Male	87	3	1	Research Scientist	2	Single	2501	18775	1	Y	No	17	3	2	80	0	1	4	3	1	1	1	0
32	No	Travel_Rarely	548	Research & Development	1	3	Life Sciences	1	96	2	Male	66	3	2	Research Scientist	2	Married	6220	7346	1	Y	No	17	3	2	80	2	10	3	3	10	4	0	2
36	No	Travel_Rarely	132	Research & Development	6	3	Life Sciences	1	97	2	Female	55	4	1	Laboratory Technician	4	Married	3038	22002	3	Y	No	12	3	2	80	0	5	3	3	1	0	0	2
35	No	Travel_Rarely	776	Sales	1	4	Marketing	1	100	3	Male	32	2	2	Sales Executive	1	Single	4312	23016	0	Y	No	14	3	2	80	0	16	2	3	15	13	2	2
45	No	Travel_Rarely	193	Research & Development	6	4	Other	1	101	4	Male	52	3	3	Research Director	1	Married	13245	15067	4	Y	Yes	14	3	2	80	0	17	3	4	0	0	0	2
51	No	Travel_Rarely	432	Research & Development	9	4	Life Sciences	1	116	4	Male	96	3	1	Laboratory Technician	4	Married	2075	18725	3	Y	No	23	4	2	80	2	10	4	3	4	2	0	7
30	No	Travel_Rarely	1334	Sales	4	2	Medical	1	121	3	Female	63	2	2	Sales Executive	2	Divorced	5209	19760	1	Y	Yes	12	3	2	80	3	11	4	2	11	8	2	2
28	No	Non-Travel	120	Sales	4	3	Medical	1	129	2	Male	43	3	2	Sales Executive	3	Married	4221	8863	1	Y	No	15	3	2	80	0	5	3	4	5	4	0	4
20	Yes	Travel_Frequently	871	Research & Development	6	3	Life Sciences	1	137	4	Female	66	2	1	Laboratory Technician	4	Single	2926	19783	1	Y	Yes	18	3	2	80	0	1	5	3	1	0	1	2
31	Yes	Travel_Rarely	249	Sales	6	4	Life Sciences	1	163	2	Male	76	1	2	Sales Executive	3	Married	6172	20739	4	Y	Yes	18	3	2	80	0	12	3	2	7	7	7	8
45	No	Travel_Rarely	1316	Research & Development	29	3	Medical	1	192	3	Male	83	3	1	Research Scientist	4	Single	3452	9752	5	Y	No	13	3	2	80	0	9	2	2	6	5	0	0
38	No	Travel_Rarely	364	Research & Development	3	5	Technical Degree	1	193	4	Female	32	3	2	Research Scientist	3	Single	4317	2302	3	Y	Yes	20	4	2	80	0	19	2	3	3	2	2	9
41	No	Travel_Frequently	857	Research & Development	10	3	Life Sciences	1	199	4	Male	91	2	4	Manager	1	Divorced	17181	12888	4	Y	No	13	3	2	80	1	21	2	2	7	6	7	0
58	No	Travel_Rarely	1145	Research & Development	9	3	Medical	1	214	2	Female	75	2	1	Research Scientist	2	Married	3346	11873	4	Y	Yes	20	4	2	80	1	9	3	2	1	0	0	2
57	No	Travel_Rarely	334	Research & Development	24	2	Life Sciences	1	223	3	Male	83	4	3	Healthcare Representative	4	Divorced	9439	23402	3	Y	Yes	16	3	2	80	1	12	2	1	5	3	1	4
50	No	Travel_Rarely	1452	Research & Development	11	3	Life Sciences	1	226	3	Female	53	3	5	Manager	2	Single	19926	17053	3	Y	No	15	3	2	80	0	21	5	3	5	4	4	0
40	No	Travel_Rarely	989	Research & Development	4	1	Medical	1	253	4	Female	46	3	5	Manager	3	Married	19033	6499	1	Y	No	14	3	2	80	1	21	2	3	20	8	9	7
42	No	Non-Travel	926	Research & Development	21	2	Medical	1	270	3	Female	36	3	2	Manufacturing Director	3	Divorced	5265	16439	2	Y	No	16	3	2	80	1	11	5	3	5	3	0	7
38	No	Travel_Rarely	1261	Research & Development	2	4	Life Sciences	1	271	4	Male	88	3	2	Manufacturing Director	3	Married	6553	7259	9	Y	No	14	3	2	80	0	14	3	3	1	0	0	7
38	Yes	Travel_Rarely	1180	Research & Development	29	1	Medical	1	282	2	Male	70	3	2	Healthcare Representative	1	Married	6673	11354	7	Y	Yes	19	3	2	80	0	17	2	3	1	0	0	8
52	No	Travel_Rarely	1323	Research & Development	2	3	Life Sciences	1	316	3	Female	89	2	1	Laboratory Technician	4	Single	3212	3300	7	Y	No	15	3	2	80	0	6	3	2	2	2	2	8
34	No	Travel_Rarely	470	Research & Development	2	4	Life Sciences	1	339	4	Male	84	2	2	Manufacturing Director	1	Married	5957	23687	6	Y	No	13	3	2	80	1	13	3	3	11	9	5	1
37	Yes	Travel_Frequently	504	Research & Development	10	3	Medical	1	342	1	Male	61	3	3	Manufacturing Director	3	Divorced	10048	22573	6	Y	No	11	3	2	80	2	17	5	3	1	0	0	2
51	No	Travel_Rarely	833	Research & Development	1	3	Life Sciences	1	353	3	Male	96	3	1	Research Scientist	4	Married	2723	23231	1	Y	No	11	3	2	80	0	1	0	2	1	0	0	3
31	Yes	Travel_Frequently	307	Research & Development	29	2	Medical	1	355	3	Male	71	2	1	Laboratory Technician	2	Single	3479	11652	0	Y	No	11	3	2	80	0	6	2	4	5	4	1	0
46	No	Travel_Rarely	488	Sales	2	3	Technical Degree	1	363	3	Female	75	1	4	Manager	2	Married	16872	14977	3	Y	Yes	12	3	2	80	1	28	2	2	7	7	7	11
29	No	Travel_Rarely	1210	Sales	2	3	Medical	1	366	1	Male	78	2	2	Sales Executive	2	Married	6644	3687	2	Y	No	19	3	2	80	2	10	2	3	0	0	0	2
31	No	Travel_Rarely	1463	Research & Development	23	3	Medical	1	367	2	Male	64	2	2	Healthcare Representative	4	Married	5582	14408	0	Y	No	21	4	2	80	1	10	2	3	9	0	7	8
45	No	Travel_Rarely	1385	Research & Development	20	2	Medical	1	372	3	Male	79	3	4	Healthcare Representative	4	Married	13496	7501	0	Y	Yes	14	3	2	80	0	21	2	3	20	7	4	10
37	No	Travel_Rarely	228	Sales	6	4	Medical	1	378	3	Male	98	3	2	Sales Executive	4	Married	6502	22825	4	Y	No	14	3	2	80	1	7	5	4	5	4	0	7
35	No	Travel_Rarely	1315	Research & Development	22	3	Life Sciences	1	381	2	Female	71	4	3	Manager	2	Divorced	11996	19100	7	Y	No	18	3	2	80	1	10	6	2	7	7	6	7
37	No	Travel_Rarely	1372	Research & Development	1	3	Life Sciences	1	391	4	Female	42	3	1	Research Scientist	4	Single	2115	15881	1	Y	No	12	3	2	80	0	17	3	3	17	12	5	7
38	No	Travel_Rarely	688	Research & Development	23	4	Life Sciences	1	393	4	Male	82	3	2	Healthcare Representative	4	Divorced	5745	18899	9	Y	No	14	3	2	80	1	10	2	3	2	2	1	2
26	Yes	Travel_Rarely	950	Sales	4	4	Marketing	1	401	4	Male	48	2	2	Sales Executive	4	Single	5828	8450	1	Y	Yes	12	3	2	80	0	8	0	3	8	7	7	9
41	No	Travel_Rarely	334	Sales	2	4	Life Sciences	1	410	4	Male	88	3	4	Manager	2	Single	16015	15896	1	Y	No	19	3	2	80	0	22	2	3	22	10	0	4
31	No	Travel_Rarely	218	Sales	7	3	Technical Degree	1	416	2	Male	100	4	2	Sales Executive	4	Married	6929	12241	4	Y	No	11	3	2	80	1	10	3	2	8	7	7	7
31	No	Travel_Rarely	192	Research & Development	2	4	Life Sciences	1	426	3	Male	32	3	1	Research Scientist	4	Divorced	2695	7747	0	Y	Yes	18	3	2	80	1	3	2	1	2	2	2	7
33	No	Travel_Frequently	553	Research & Development	5	4	Life Sciences	1	428	4	Female	74	3	3	Manager	2	Married	11878	23364	6	Y	No	11	3	2	80	2	12	2	3	10	6	8	2
27	No	Travel_Rarely	1220	Research & Development	5	3	Life Sciences	1	434	3	Female	85	3	1	Research Scientist	2	Single	2478	20938	1	Y	Yes	12	3	2	80	0	4	2	2	4	3	1	9
47	No	Travel_Rarely	1482	Research & Development	5	5	Life Sciences	1	447	4	Male	42	3	5	Research Director	3	Married	18300	16375	4	Y	No	11	3	2	80	1	21	2	3	3	2	1	9
43	No	Travel_Frequently	559	Research & Development	10	4	Life Sciences	1	448	3	Female	82	2	2	Laboratory Technician	3	Divorced	5257	6227	1	Y	No	11	3	2	80	1	9	3	4	9	7	0	3
38	No	Travel_Rarely	343	Research & Development	15	2	Life Sciences	1	461	3	Male	92	2	3	Research Director	4	Divorced	11510	15682	0	Y	Yes	14	3	2	80	1	12	3	3	11	10	2	0
42	No	Travel_Rarely	810	Research & Development	23	5	Life Sciences	1	468	1	Female	44	3	4	Research Director	4	Single	15992	15901	2	Y	No	14	3	2	80	0	16	2	3	1	0	0	1
48	No	Travel_Rarely	530	Sales	29	1	Medical	1	473	1	Female	91	3	3	Manager	3	Married	12504	23978	3	Y	No	21	4	2	80	1	15	3	1	0	0	0	1
30	No	Non-Travel	641	Sales	25	2	Technical Degree	1	475	4	Female	85	3	2	Sales Executive	3	Married	4736	6069	7	Y	Yes	12	3	2	80	1	4	2	4	2	2	2	0
26	No	Travel_Rarely	933	Sales	1	3	Life Sciences	1	476	3	Male	57	3	2	Sales Executive	3	Married	5296	20156	1	Y	No	17	3	2	80	1	8	3	3	8	7	7	4
42	No	Travel_Rarely	1332	Research & Development	2	4	Other	1	477	1	Male	98	2	2	Healthcare Representative	4	Single	6781	17078	3	Y	No	23	4	2	80	0	14	6	3	1	0	0	3
36	No	Non-Travel	845	Sales	1	5	Medical	1	479	4	Female	45	3	2	Sales Executive	4	Single	6653	15276	4	Y	No	15	3	2	80	0	7	6	3	1	0	0	0
33	Yes	Travel_Rarely	350	Sales	5	3	Marketing	1	485	4	Female	34	3	1	Sales Representative	3	Single	2851	9150	1	Y	Yes	13	3	2	80	0	1	2	3	1	0	0	8
37	No	Travel_Rarely	921	Research & Development	10	3	Medical	1	486	3	Female	98	3	1	Laboratory Technician	1	Married	3452	17663	6	Y	No	20	4	2	80	1	17	3	3	5	4	0	2
27	No	Travel_Rarely	1469	Research & Development	1	2	Medical	1	497	4	Male	82	3	1	Laboratory Technician	2	Divorced	3816	17881	1	Y	No	11	3	2	80	1	5	2	3	5	2	0	7
36	No	Travel_Rarely	329	Research & Development	2	3	Life Sciences	1	501	4	Female	96	3	1	Research Scientist	3	Married	2543	11868	4	Y	No	13	3	2	80	1	6	3	3	2	2	2	2
34	Yes	Non-Travel	1362	Sales	19	3	Marketing	1	502	1	Male	67	4	2	Sales Executive	4	Single	5304	4652	8	Y	Yes	13	3	2	80	0	9	3	2	5	2	0	2
36	No	Travel_Rarely	164	Sales	2	2	Medical	1	513	2	Male	61	2	3	Sales Executive	3	Married	7596	3809	1	Y	No	13	3	2	80	2	10	2	3	10	9	9	7
42	No	Travel_Rarely	201	Research & Development	1	4	Life Sciences	1	517	2	Female	95	3	1	Laboratory Technician	1	Divorced	2576	20490	3	Y	No	16	3	2	80	1	8	5	3	5	2	1	4
40	No	Travel_Rarely	555	Research & Development	2	3	Medical	1	521	2	Female	78	2	2	Laboratory Technician	3	Married	3448	13436	6	Y	No	22	4	2	80	1	20	3	3	1	0	0	9
31	No	Travel_Rarely	480	Research & Development	7	2	Medical	1	524	2	Female	31	3	2	Manufacturing Director	1	Married	4306	4156	1	Y	No	12	3	2	80	1	13	5	1	13	10	3	10
25	No	Travel_Rarely	891	Sales	4	2	Life Sciences	1	527	2	Female	99	2	2	Sales Executive	4	Single	4487	12090	1	Y	Yes	11	3	2	80	0	5	3	3	5	4	1	7
30	No	Travel_Rarely	1082	Sales	12	3	Technical Degree	1	533	2	Female	83	3	2	Sales Executive	3	Single	6577	19558	0	Y	No	11	3	2	80	0	6	6	3	5	4	4	13
42	No	Travel_Frequently	532	Research & Development	29	2	Life Sciences	1	547	1	Female	92	3	2	Research Scientist	3	Divorced	4556	12932	2	Y	No	11	3	2	80	1	19	3	3	5	4	0	2
24	Yes	Travel_Rarely	1448	Sales	1	1	Technical Degree	1	554	1	Female	62	3	1	Sales Representative	2	Single	3202	21972	1	Y	Yes	16	3	2	80	0	6	4	3	5	3	1	2
26	No	Travel_Rarely	1349	Research & Development	23	3	Life Sciences	1	560	1	Female	90	3	1	Research Scientist	4	Divorced	2886	3032	1	Y	No	22	4	2	80	2	3	3	1	3	2	0	0
29	Yes	Travel_Rarely	408	Research & Development	25	5	Technical Degree	1	565	3	Female	71	2	1	Research Scientist	2	Married	2546	18300	5	Y	No	16	3	2	80	0	6	2	4	2	2	1	0
50	No	Travel_Rarely	1099	Research & Development	29	4	Life Sciences	1	569	2	Male	88	2	4	Manager	3	Married	17046	9314	0	Y	No	15	3	2	80	1	28	2	3	27	10	15	2
45	No	Travel_Rarely	561	Sales	2	3	Other	1	606	4	Male	61	3	2	Sales Executive	2	Married	4805	16177	0	Y	No	19	3	2	80	1	9	3	4	8	7	3	0
26	Yes	Travel_Frequently	426	Human Resources	17	4	Life Sciences	1	608	2	Female	58	3	1	Human Resources	3	Divorced	2741	22808	0	Y	Yes	11	3	2	80	1	8	2	2	7	7	1	7
29	No	Travel_Rarely	232	Research & Development	19	3	Technical Degree	1	611	4	Male	34	3	2	Manufacturing Director	4	Divorced	4262	22645	4	Y	No	12	3	2	80	2	8	2	4	3	2	1	0
26	Yes	Travel_Rarely	471	Research & Development	24	3	Technical Degree	1	622	3	Male	66	1	1	Laboratory Technician	4	Single	2340	23213	1	Y	Yes	18	3	2	80	0	1	3	1	1	0	0	7
41	No	Travel_Rarely	1276	Sales	2	5	Life Sciences	1	625	2	Female	91	3	4	Manager	1	Married	16595	5626	7	Y	No	16	3	2	80	1	22	2	3	18	16	11	2
52	No	Travel_Rarely	956	Research & Development	6	2	Technical Degree	1	630	4	Male	78	3	2	Research Scientist	1	Divorced	5577	22087	3	Y	Yes	12	3	2	80	2	18	3	3	10	9	6	7
37	No	Travel_Rarely	446	Research & Development	1	4	Life Sciences	1	635	2	Female	65	3	2	Manufacturing Director	2	Married	6447	15701	6	Y	No	12	3	2	80	1	8	2	2	6	5	4	0
24	No	Travel_Rarely	691	Research & Development	23	3	Medical	1	639	2	Male	89	4	1	Research Scientist	4	Married	2725	21630	1	Y	Yes	11	3	2	80	2	6	3	3	6	5	1	2
42	No	Travel_Rarely	622	Research & Development	2	4	Life Sciences	1	659	3	Female	81	3	2	Healthcare Representative	4	Married	4089	5718	1	Y	No	13	3	2	80	2	10	4	3	10	2	2	0
43	No	Travel_Frequently	1001	Research & Development	9	5	Medical	1	663	4	Male	72	3	2	Laboratory Technician	3	Divorced	5679	19627	3	Y	Yes	13	3	2	80	1	10	3	3	8	7	4	12
44	No	Travel_Rarely	1112	Human Resources	1	4	Life Sciences	1	665	1	Female	50	2	2	Human Resources	3	Single	5985	26894	4	Y	No	11	3	2	80	0	10	1	4	2	2	0	2
27	Yes	Travel_Rarely	1420	Sales	2	1	Marketing	1	667	3	Male	85	3	1	Sales Representative	1	Divorced	3041	16346	0	Y	No	11	3	2	80	1	5	3	3	4	3	0	7
35	No	Travel_Rarely	1017	Research & Development	6	4	Life Sciences	1	691	2	Male	82	1	2	Research Scientist	4	Single	6646	19368	1	Y	No	13	3	2	80	0	17	3	3	17	11	11	2
27	No	Travel_Frequently	1410	Sales	3	1	Medical	1	714	4	Female	71	4	2	Sales Executive	4	Divorced	4647	16673	1	Y	Yes	20	4	2	80	2	6	3	3	6	5	0	0
34	No	Travel_Rarely	1442	Research & Development	9	3	Medical	1	717	4	Female	46	2	3	Healthcare Representative	2	Single	8621	17654	1	Y	No	14	3	2	80	0	9	3	4	8	7	7	3
41	No	Travel_Rarely	427	Human Resources	10	4	Human Resources	1	731	2	Male	73	2	5	Manager	4	Divorced	19141	8861	3	Y	No	15	3	2	80	3	23	2	2	21	6	12	0
41	No	Travel_Rarely	314	Human Resources	1	3	Human Resources	1	734	4	Male	59	2	5	Manager	3	Married	19189	19562	1	Y	No	12	3	2	80	1	22	3	3	22	7	2	7
38	No	Travel_Rarely	268	Research & Development	2	5	Medical	1	773	4	Male	92	3	1	Research Scientist	3	Married	3057	20471	6	Y	Yes	13	3	2	80	1	6	0	1	1	0	0	3
25	No	Travel_Rarely	883	Sales	26	1	Medical	1	781	3	Female	32	3	2	Sales Executive	4	Single	6180	22807	1	Y	No	23	4	2	80	0	6	5	2	6	5	1	0
36	No	Non-Travel	1434	Sales	8	4	Life Sciences	1	789	1	Male	76	2	3	Sales Executive	1	Single	7587	14229	1	Y	No	15	3	2	80	0	10	1	3	10	7	0	2
54	No	Travel_Rarely	376	Research & Development	19	4	Medical	1	799	4	Female	95	3	2	Manufacturing Director	1	Divorced	5485	22670	9	Y	Yes	11	3	2	80	2	9	4	3	5	3	1	0
27	No	Travel_Frequently	829	Sales	8	1	Marketing	1	800	3	Male	84	3	2	Sales Executive	4	Married	4342	24008	0	Y	No	19	3	2	80	1	5	3	3	4	2	1	2
37	No	Travel_Rarely	571	Research & Development	10	1	Life Sciences	1	802	4	Female	82	3	1	Research Scientist	1	Divorced	2782	19905	0	Y	Yes	13	3	2	80	2	6	3	2	5	3	4	0
35	No	Travel_Rarely	384	Sales	8	4	Life Sciences	1	805	1	Female	72	3	1	Sales Representative	4	Married	2572	20317	1	Y	No	16	3	2	80	1	3	1	2	3	2	0	4
34	No	Travel_Rarely	1111	Sales	8	2	Life Sciences	1	808	3	Female	93	3	2	Sales Executive	1	Married	6500	13305	5	Y	No	17	3	2	80	1	6	1	3	3	2	1	7
42	No	Travel_Frequently	570	Research & Development	8	3	Life Sciences	1	809	2	Male	66	3	5	Manager	4	Divorced	18430	16225	1	Y	No	13	3	2	80	1	24	4	2	24	7	14	0
52	No	Travel_Rarely	1325	Research & Development	11	4	Life Sciences	1	813	4	Female	82	3	2	Laboratory Technician	3	Married	3149	21821	8	Y	No	20	4	2	80	1	9	3	3	5	2	1	7
36	No	Travel_Rarely	1041	Human Resources	13	3	Human Resources	1	829	3	Male	36	3	1	Human Resources	2	Married	2143	25527	4	Y	No	13	3	2	80	1	8	2	3	5	2	0	2
30	No	Travel_Rarely	946	Research & Development	2	3	Medical	1	833	3	Female	52	2	2	Manufacturing Director	4	Single	6877	20234	5	Y	Yes	24	4	2	80	0	12	4	2	0	0	0	4
27	No	Travel_Rarely	269	Research & Development	5	1	Technical Degree	1	844	3	Male	42	2	3	Research Director	4	Divorced	12808	8842	1	Y	Yes	16	3	2	80	1	9	3	3	9	8	0	2
35	No	Travel_Rarely	950	Research & Development	7	3	Other	1	845	3	Male	59	3	3	Manufacturing Director	3	Single	10221	18869	3	Y	No	21	4	2	80	0	17	3	4	8	5	1	3
30	No	Travel_Frequently	1012	Research & Development	5	4	Life Sciences	1	861	2	Male	75	2	1	Research Scientist	4	Divorced	3761	2373	9	Y	No	12	3	2	80	1	10	3	2	5	4	0	0
35	No	Travel_Rarely	607	Research & Development	9	3	Life Sciences	1	880	4	Female	66	2	3	Manufacturing Director	3	Married	10685	23457	1	Y	Yes	20	4	2	80	1	17	2	3	17	14	5	4
32	No	Non-Travel	300	Research & Development	1	3	Life Sciences	1	882	4	Male	61	3	1	Laboratory Technician	4	Divorced	2314	9148	0	Y	No	12	3	2	80	1	4	2	3	3	0	0	2
49	No	Travel_Rarely	1418	Research & Development	1	3	Technical Degree	1	887	3	Female	36	3	1	Research Scientist	1	Married	3580	10554	2	Y	No	16	3	2	80	1	7	2	3	4	2	0	0
42	No	Travel_Rarely	1265	Research & Development	3	3	Life Sciences	1	894	3	Female	95	4	2	Laboratory Technician	4	Married	5231	23726	2	Y	Yes	13	3	2	80	1	17	1	2	5	3	1	0
31	No	Travel_Rarely	1222	Research & Development	11	4	Life Sciences	1	895	4	Male	48	3	1	Research Scientist	4	Married	2356	14871	3	Y	Yes	19	3	2	80	1	8	2	3	6	4	0	17
37	No	Travel_Frequently	1231	Sales	21	2	Medical	1	900	3	Female	54	3	1	Sales Representative	4	Married	2973	21222	5	Y	No	15	3	2	80	1	10	3	3	5	4	0	3
43	No	Travel_Frequently	422	Research & Development	1	3	Life Sciences	1	902	4	Female	33	3	2	Healthcare Representative	4	Married	5562	21782	4	Y	No	13	3	2	80	1	12	2	2	5	2	2	2
28	No	Travel_Rarely	821	Sales	5	4	Medical	1	916	1	Male	98	3	2	Sales Executive	4	Single	4908	24252	1	Y	No	14	3	2	80	0	4	3	3	4	2	0	1
28	No	Travel_Rarely	995	Research & Development	9	3	Medical	1	930	3	Female	77	3	1	Research Scientist	3	Divorced	2377	9834	5	Y	No	18	3	2	80	1	6	2	3	2	2	2	9
34	No	Travel_Rarely	546	Research & Development	10	3	Life Sciences	1	934	2	Male	83	3	1	Laboratory Technician	2	Divorced	2008	6896	1	Y	No	14	3	2	80	2	1	3	3	1	0	1	0
33	No	Travel_Rarely	1198	Research & Development	1	4	Other	1	939	3	Male	100	2	1	Research Scientist	1	Single	2799	3339	3	Y	Yes	11	3	2	80	0	6	1	3	3	2	0	2
31	No	Travel_Rarely	154	Sales	7	4	Life Sciences	1	941	2	Male	41	2	1	Sales Representative	3	Married	2329	11737	3	Y	No	15	3	2	80	0	13	2	4	7	7	5	2
38	No	Travel_Rarely	1333	Research & Development	1	3	Technical Degree	1	950	4	Female	80	3	3	Research Director	1	Married	13582	16292	1	Y	No	13	3	2	80	1	15	3	3	15	12	5	12
40	No	Travel_Rarely	658	Sales	10	4	Marketing	1	954	1	Male	67	2	3	Sales Executive	2	Divorced	9705	20652	2	Y	No	12	3	2	80	1	11	2	2	1	0	0	2
26	No	Travel_Frequently	1283	Sales	1	3	Medical	1	956	3	Male	52	2	2	Sales Executive	1	Single	4294	11148	1	Y	No	12	3	2	80	0	7	2	3	7	7	0	2
19	Yes	Travel_Rarely	419	Sales	21	3	Other	1	959	4	Male	37	2	1	Sales Representative	2	Single	2121	9947	1	Y	Yes	13	3	2	80	0	1	3	4	1	0	0	3
20	Yes	Travel_Rarely	129	Research & Development	4	3	Technical Degree	1	960	1	Male	84	3	1	Laboratory Technician	1	Single	2973	13008	1	Y	No	19	3	2	80	0	1	2	3	1	0	0	7
45	No	Non-Travel	805	Research & Development	4	2	Life Sciences	1	972	3	Male	57	3	2	Laboratory Technician	2	Married	4447	23163	1	Y	No	12	3	2	80	0	9	5	2	9	7	0	2
29	No	Travel_Frequently	1404	Sales	20	3	Technical Degree	1	974	3	Female	84	3	1	Sales Representative	4	Married	2157	18203	1	Y	No	15	3	2	80	1	3	5	3	3	1	0	6
35	No	Travel_Rarely	1219	Sales	18	3	Medical	1	975	3	Female	86	3	2	Sales Executive	3	Married	4601	6179	1	Y	No	16	3	2	80	0	5	3	3	5	2	1	7
52	No	Travel_Rarely	1053	Research & Development	1	2	Life Sciences	1	976	4	Male	70	3	4	Manager	4	Married	17099	13829	2	Y	No	15	3	2	80	1	26	2	2	9	8	7	4
38	No	Non-Travel	152	Sales	10	3	Technical Degree	1	983	3	Female	85	3	2	Sales Executive	4	Single	5666	19899	1	Y	Yes	13	3	2	80	0	6	1	3	5	3	1	7
35	No	Travel_Rarely	882	Sales	3	4	Life Sciences	1	984	4	Male	92	3	3	Sales Executive	4	Divorced	7823	6812	6	Y	No	13	3	2	80	1	12	2	3	10	9	0	8
41	No	Travel_Frequently	840	Research & Development	9	3	Medical	1	999	1	Male	64	3	5	Research Director	3	Divorced	19419	3735	2	Y	No	17	3	2	80	1	21	2	4	18	16	0	2
27	No	Travel_Rarely	1134	Research & Development	16	4	Technical Degree	1	1001	3	Female	37	3	1	Laboratory Technician	2	Married	2811	12086	9	Y	No	14	3	2	80	1	4	2	3	2	2	2	4
30	Yes	Travel_Rarely	138	Research & Development	22	3	Life Sciences	1	1004	1	Female	48	3	1	Research Scientist	3	Married	2132	11539	4	Y	Yes	11	3	2	80	0	7	2	3	5	2	0	2
38	No	Travel_Frequently	1391	Research & Development	10	1	Medical	1	1006	3	Male	66	3	1	Research Scientist	3	Married	2684	12127	0	Y	No	17	3	2	80	1	3	0	2	2	1	0	4
46	No	Travel_Rarely	566	Research & Development	7	2	Medical	1	1007	4	Male	75	3	3	Manufacturing Director	3	Divorced	10845	24208	6	Y	No	13	3	2	80	1	13	3	3	8	7	0	2
24	No	Travel_Rarely	1206	Research & Development	17	1	Medical	1	1009	4	Female	41	2	2	Manufacturing Director	3	Divorced	4377	24117	1	Y	No	15	3	2	80	2	5	6	3	4	2	3	2
26	No	Travel_Rarely	1066	Research & Development	2	2	Medical	1	1018	4	Male	32	4	2	Manufacturing Director	4	Married	5472	3334	1	Y	No	12	3	2	80	0	8	2	3	8	7	1	10
48	No	Travel_Rarely	1355	Research & Development	4	4	Life Sciences	1	1024	3	Male	78	2	3	Healthcare Representative	3	Single	10999	22245	7	Y	No	14	3	2	80	0	27	3	3	15	11	4	8
41	No	Travel_Rarely	549	Research & Development	7	2	Medical	1	1025	4	Female	42	3	2	Manufacturing Director	3	Single	5003	23371	6	Y	No	14	3	2	80	0	8	6	3	2	2	2	4
27	No	Travel_Rarely	1055	Research & Development	2	4	Life Sciences	1	1027	1	Female	47	3	2	Manufacturing Director	4	Married	4227	4658	0	Y	No	18	3	2	80	1	4	2	3	3	2	2	4
42	No	Travel_Rarely	265	Sales	5	2	Marketing	1	1029	4	Male	90	3	5	Manager	3	Married	18303	7770	6	Y	No	13	3	2	80	0	21	3	4	1	0	0	0
50	No	Travel_Rarely	804	Research & Development	9	3	Life Sciences	1	1030	1	Male	64	3	1	Laboratory Technician	4	Married	2380	20165	4	Y	No	18	3	2	80	0	8	5	3	1	0	0	0
41	No	Non-Travel	247	Research & Development	7	1	Life Sciences	1	1035	2	Female	55	1	5	Research Director	3	Divorced	19973	20284	1	Y	No	22	4	2	80	2	21	3	3	21	16	5	12
45	No	Travel_Rarely	1234	Sales	11	2	Life Sciences	1	1045	4	Female	90	3	4	Manager	4	Married	17650	5404	3	Y	No	13	3	2	80	1	26	4	4	9	3	1	2
32	No	Non-Travel	1109	Research & Development	29	4	Medical	1	1046	4	Female	69	3	1	Laboratory Technician	3	Single	4025	11135	9	Y	No	12	3	2	80	0	10	2	3	8	7	7	4
36	Yes	Travel_Rarely	660	Research & Development	15	3	Other	1	1052	1	Male	81	3	2	Laboratory Technician	3	Divorced	4834	7858	7	Y	No	14	3	2	80	1	9	3	2	1	0	0	7
26	Yes	Travel_Frequently	342	Research & Development	2	3	Life Sciences	1	1053	1	Male	57	3	1	Research Scientist	1	Married	2042	15346	6	Y	Yes	14	3	2	80	1	6	2	3	3	2	1	1
28	No	Travel_Rarely	1144	Sales	10	1	Medical	1	1056	4	Male	74	3	1	Sales Representative	2	Married	1052	23384	1	Y	No	22	4	2	80	0	1	5	3	1	0	0	0
40	No	Travel_Rarely	300	Sales	26	3	Marketing	1	1066	3	Male	74	3	2	Sales Executive	1	Married	8396	22217	1	Y	No	14	3	2	80	1	8	3	2	7	7	7	8
54	No	Travel_Rarely	1082	Sales	2	4	Life Sciences	1	1070	3	Female	41	2	3	Sales Executive	3	Married	10686	8392	6	Y	No	11	3	2	80	1	13	4	3	9	4	7	0
56	No	Travel_Frequently	1240	Research & Development	9	3	Medical	1	1071	1	Female	63	3	1	Research Scientist	3	Married	2942	12154	2	Y	No	19	3	2	80	1	18	4	3	5	4	0	7
36	No	Travel_Rarely	796	Research & Development	12	5	Medical	1	1073	4	Female	51	2	3	Manufacturing Director	4	Single	8858	15669	0	Y	No	11	3	2	80	0	15	2	2	14	8	7	7
55	No	Non-Travel	444	Research & Development	2	1	Medical	1	1074	3	Male	40	2	4	Manager	1	Single	16756	17323	7	Y	No	15	3	2	80	0	31	3	4	9	7	6	11
20	Yes	Travel_Frequently	769	Sales	9	3	Marketing	1	1077	4	Female	54	3	1	Sales Representative	4	Single	2323	17205	1	Y	Yes	14	3	2	80	0	2	3	3	2	2	0	4
55	No	Travel_Frequently	1091	Research & Development	2	1	Life Sciences	1	1096	4	Male	65	3	3	Manufacturing Director	2	Married	10976	15813	3	Y	No	18	3	2	80	1	23	4	3	3	2	1	1
33	Yes	Travel_Frequently	827	Research & Development	29	4	Medical	1	1101	1	Female	54	2	2	Research Scientist	3	Single	4508	3129	1	Y	No	22	4	2	80	0	14	4	3	13	7	3	3
25	Yes	Travel_Rarely	1219	Research & Development	4	1	Technical Degree	1	1106	4	Male	32	3	1	Laboratory Technician	4	Married	3691	4605	1	Y	Yes	15	3	2	80	1	7	3	4	7	7	5	0
33	Yes	Travel_Rarely	1017	Research & Development	25	3	Medical	1	1108	1	Male	55	2	1	Research Scientist	2	Single	2313	2993	4	Y	Yes	20	4	2	80	0	5	0	3	2	2	2	7
38	No	Travel_Rarely	770	Sales	10	4	Marketing	1	1119	3	Male	73	2	3	Sales Executive	3	Divorced	8740	5569	0	Y	Yes	14	3	2	80	2	9	2	3	8	7	2	2
28	No	Travel_Rarely	950	Research & Development	3	3	Medical	1	1121	4	Female	93	3	3	Manufacturing Director	2	Divorced	7655	8039	0	Y	No	17	3	2	80	3	10	3	2	9	7	1	8
49	No	Travel_Rarely	174	Sales	8	4	Technical Degree	1	1138	4	Male	56	2	4	Sales Executive	2	Married	13120	11879	6	Y	No	17	3	2	80	1	22	3	3	9	8	2	7
35	No	Travel_Rarely	528	Human Resources	8	4	Technical Degree	1	1164	3	Male	100	3	1	Human Resources	3	Single	4323	7108	1	Y	No	17	3	2	80	0	6	2	1	5	4	1	3
42	Yes	Travel_Frequently	481	Sales	12	3	Life Sciences	1	1167	3	Male	44	3	4	Sales Executive	1	Single	13758	2447	0	Y	Yes	12	3	2	80	0	22	2	2	21	9	13	2
35	No	Travel_Rarely	982	Research & Development	1	4	Medical	1	1172	4	Male	58	2	1	Laboratory Technician	3	Married	2258	16340	6	Y	No	12	3	2	80	1	10	2	3	8	0	1	0
26	No	Travel_Rarely	1384	Research & Development	3	4	Medical	1	1177	1	Male	82	4	1	Laboratory Technician	4	Married	4420	13421	1	Y	No	22	4	2	80	1	8	2	3	8	7	0	0
35	No	Travel_Rarely	819	Research & Development	2	3	Life Sciences	1	1182	3	Male	44	2	3	Manufacturing Director	2	Divorced	10274	19588	2	Y	No	18	3	2	80	1	15	2	4	7	7	6	2
35	No	Travel_Frequently	636	Research & Development	4	4	Other	1	1185	4	Male	47	2	1	Laboratory Technician	4	Married	2376	26537	1	Y	No	13	3	2	80	1	2	2	4	2	2	2	0
43	Yes	Travel_Rarely	1372	Sales	9	3	Marketing	1	1188	1	Female	85	1	2	Sales Executive	3	Single	5346	9489	8	Y	No	13	3	2	80	0	7	2	2	4	3	1	7
37	No	Travel_Rarely	977	Research & Development	1	3	Life Sciences	1	1196	4	Female	56	2	2	Manufacturing Director	4	Married	6474	9961	1	Y	No	13	3	2	80	1	14	2	2	14	8	3	2
53	No	Travel_Rarely	1223	Research & Development	7	2	Medical	1	1201	4	Female	50	3	5	Manager	3	Divorced	18606	18640	3	Y	No	18	3	2	80	1	26	6	3	7	7	4	7
22	Yes	Travel_Frequently	1256	Research & Development	3	4	Life Sciences	1	1203	3	Male	48	2	1	Research Scientist	4	Married	2853	4223	0	Y	Yes	11	3	2	80	1	1	5	3	0	0	0	7
44	No	Travel_Rarely	200	Research & Development	29	4	Other	1	1225	4	Male	32	3	2	Research Scientist	4	Single	4541	7744	1	Y	No	25	4	2	80	0	20	3	3	20	11	13	10
60	No	Travel_Rarely	696	Sales	7	4	Marketing	1	1233	2	Male	52	4	2	Sales Executive	4	Divorced	5220	10893	0	Y	Yes	18	3	2	80	1	12	3	3	11	7	1	9
33	No	Travel_Rarely	117	Research & Development	9	3	Medical	1	1238	1	Male	60	3	1	Research Scientist	4	Married	2781	6311	0	Y	No	13	3	2	80	1	15	5	3	14	10	4	13
40	No	Travel_Rarely	107	Sales	10	3	Technical Degree	1	1239	2	Female	84	2	2	Sales Executive	2	Divorced	6852	11591	7	Y	No	12	3	2	80	1	7	2	4	5	1	1	7
25	No	Travel_Rarely	1356	Sales	10	4	Life Sciences	1	1240	3	Male	57	3	2	Sales Executive	4	Single	4950	20623	0	Y	No	14	3	2	80	0	5	4	3	4	3	1	5
35	No	Non-Travel	1212	Sales	8	2	Marketing	1	1243	3	Female	78	2	3	Sales Executive	4	Married	10377	13755	4	Y	Yes	11	3	2	80	1	16	6	2	13	2	4	8
19	Yes	Non-Travel	504	Research & Development	10	3	Medical	1	1248	1	Female	96	2	1	Research Scientist	2	Single	1859	6148	1	Y	Yes	25	4	2	80	0	1	2	4	1	1	0	7
31	No	Travel_Rarely	1062	Research & Development	24	3	Medical	1	1252	3	Female	96	2	2	Healthcare Representative	1	Single	6812	17198	1	Y	No	19	3	2	80	0	10	2	3	10	9	1	0
43	No	Travel_Rarely	920	Research & Development	3	3	Life Sciences	1	1255	3	Male	96	1	5	Research Director	4	Married	19740	18625	3	Y	No	14	3	2	80	1	25	2	3	8	7	0	2
27	No	Travel_Rarely	1167	Research & Development	4	2	Life Sciences	1	1259	1	Male	76	3	1	Research Scientist	3	Divorced	2517	3208	1	Y	No	11	3	2	80	3	5	2	3	5	3	0	5
29	No	Travel_Rarely	1329	Research & Development	7	3	Life Sciences	1	1260	3	Male	82	3	2	Healthcare Representative	4	Divorced	6623	4204	1	Y	Yes	11	3	2	80	2	6	2	3	6	0	1	1
29	No	Travel_Rarely	694	Research & Development	1	3	Life Sciences	1	1264	4	Female	87	2	4	Research Director	4	Divorced	16124	3423	3	Y	No	14	3	2	80	2	9	2	2	7	7	1	0
26	No	Travel_Rarely	583	Research & Development	4	2	Life Sciences	1	1275	3	Male	53	3	1	Research Scientist	4	Single	2875	9973	1	Y	Yes	20	4	2	80	0	8	2	2	8	5	2	1
28	No	Travel_Frequently	193	Research & Development	2	3	Life Sciences	1	1296	4	Male	52	2	1	Laboratory Technician	4	Married	3867	14222	1	Y	Yes	12	3	2	80	1	2	2	3	2	2	2	7
51	No	Travel_Frequently	968	Research & Development	6	2	Medical	1	1297	2	Female	40	2	1	Laboratory Technician	3	Single	2838	4257	0	Y	No	14	3	2	80	0	8	6	2	7	0	7	0
28	No	Travel_Rarely	640	Research & Development	1	3	Technical Degree	1	1301	4	Male	84	3	1	Research Scientist	1	Single	2080	4732	2	Y	No	11	3	2	80	0	5	2	2	3	2	1	3
50	No	Travel_Rarely	1322	Research & Development	28	3	Life Sciences	1	1317	4	Female	43	3	4	Research Director	1	Married	16880	22422	4	Y	Yes	11	3	2	80	0	25	2	3	3	2	1	7
40	No	Non-Travel	458	Research & Development	16	2	Life Sciences	1	1340	3	Male	74	3	1	Research Scientist	3	Divorced	3544	8532	9	Y	No	16	3	2	80	1	6	0	3	4	2	0	0
35	No	Travel_Frequently	482	Research & Development	4	4	Life Sciences	1	1350	3	Male	87	3	2	Research Scientist	3	Single	4249	2690	1	Y	Yes	11	3	2	80	0	9	3	3	9	6	1	2
51	No	Travel_Rarely	770	Human Resources	5	3	Life Sciences	1	1352	3	Male	84	3	4	Manager	2	Divorced	14026	17588	1	Y	Yes	11	3	2	80	1	33	2	3	33	9	0	2
27	No	Travel_Rarely	1291	Sales	11	3	Medical	1	1364	3	Female	98	4	1	Sales Representative	4	Married	2534	6527	8	Y	No	14	3	2	80	1	5	4	3	1	0	0	8
51	No	Travel_Rarely	1405	Research & Development	11	2	Technical Degree	1	1367	4	Female	82	2	4	Manufacturing Director	2	Single	13142	24439	3	Y	No	16	3	2	80	0	29	1	2	5	2	0	7
35	No	Travel_Rarely	817	Research & Development	1	3	Medical	1	1369	4	Female	60	2	2	Laboratory Technician	4	Married	5363	10846	0	Y	No	12	3	2	80	1	10	0	3	9	7	0	9
27	No	Travel_Frequently	793	Sales	2	1	Life Sciences	1	1371	4	Male	43	1	2	Sales Executive	4	Single	5071	20392	3	Y	No	20	4	2	80	0	8	3	3	6	2	0	2
40	No	Travel_Rarely	1202	Research & Development	2	1	Medical	1	1375	2	Female	89	4	2	Healthcare Representative	3	Divorced	6377	13888	5	Y	No	20	4	2	80	3	15	0	3	12	11	11	1
51	No	Travel_Frequently	541	Sales	2	3	Marketing	1	1391	2	Male	52	3	3	Sales Executive	2	Married	10596	15395	2	Y	No	11	3	2	80	0	14	5	3	4	2	3	0
39	No	Non-Travel	1485	Research & Development	25	2	Life Sciences	1	1397	3	Male	71	3	3	Healthcare Representative	3	Married	10920	3449	3	Y	No	21	4	2	80	1	13	2	3	6	4	0	3
25	No	Travel_Rarely	1372	Sales	18	1	Life Sciences	1	1399	1	Male	93	4	2	Sales Executive	3	Married	6232	12477	2	Y	No	11	3	2	80	0	6	3	2	3	2	1	9
52	No	Travel_Frequently	322	Research & Development	28	2	Medical	1	1401	4	Female	59	4	4	Manufacturing Director	3	Married	13247	9731	2	Y	Yes	11	3	2	80	1	24	3	2	5	3	0	4
25	No	Travel_Rarely	949	Research & Development	1	3	Technical Degree	1	1415	1	Male	81	3	1	Laboratory Technician	4	Married	3229	4910	4	Y	No	11	3	2	80	1	7	2	2	3	2	0	4
31	Yes	Travel_Frequently	667	Sales	1	4	Life Sciences	1	1427	2	Female	50	1	1	Sales Representative	3	Single	1359	16154	1	Y	No	12	3	2	80	0	1	3	3	1	0	0	0
30	No	Travel_Rarely	855	Sales	7	4	Marketing	1	1428	4	Female	73	3	2	Sales Executive	1	Divorced	4779	12761	7	Y	No	14	3	2	80	2	8	3	3	3	2	0	7
27	No	Travel_Rarely	1377	Research & Development	11	1	Life Sciences	1	1434	2	Male	91	3	1	Laboratory Technician	1	Married	2099	7679	0	Y	No	14	3	2	80	0	6	3	4	5	0	1	6
47	No	Travel_Rarely	359	Research & Development	2	4	Medical	1	1443	1	Female	82	3	4	Research Director	3	Married	17169	26703	3	Y	No	19	3	2	80	2	26	2	4	20	17	5	2
39	Yes	Non-Travel	592	Research & Development	2	3	Life Sciences	1	1458	1	Female	54	2	1	Laboratory Technician	1	Single	3646	17181	2	Y	Yes	23	4	2	80	0	11	2	4	1	0	0	0
45	No	Travel_Rarely	1038	Research & Development	20	3	Medical	1	1460	2	Male	95	1	3	Healthcare Representative	1	Divorced	10851	19863	2	Y	Yes	18	3	2	80	1	24	2	3	7	7	0	3
53	No	Travel_Rarely	447	Research & Development	2	3	Medical	1	1472	4	Male	39	4	4	Research Director	2	Single	16598	19764	4	Y	No	12	3	2	80	0	35	2	2	9	8	8	2
49	No	Travel_Rarely	1495	Research & Development	5	4	Technical Degree	1	1473	1	Male	96	3	2	Healthcare Representative	3	Married	6651	21534	2	Y	No	14	3	2	80	1	20	0	2	3	2	1	2
30	No	Non-Travel	990	Research & Development	7	3	Technical Degree	1	1482	3	Male	64	3	1	Research Scientist	3	Divorced	1274	7152	1	Y	No	13	3	2	80	2	1	2	2	1	0	0	7
49	No	Travel_Rarely	1490	Research & Development	7	4	Life Sciences	1	1484	3	Male	35	3	3	Healthcare Representative	2	Divorced	10466	20948	3	Y	No	14	3	2	80	2	29	3	3	8	7	0	3
44	No	Travel_Frequently	1193	Research & Development	2	1	Medical	1	1496	2	Male	86	3	3	Manufacturing Director	3	Single	10209	19719	5	Y	Yes	18	3	2	80	0	16	2	2	2	2	2	0
55	No	Travel_Rarely	1229	Research & Development	4	4	Life Sciences	1	1501	4	Male	30	3	2	Healthcare Representative	3	Married	4035	16143	0	Y	Yes	16	3	2	80	0	4	2	3	3	2	1	0
28	No	Travel_Rarely	1083	Research & Development	29	1	Life Sciences	1	1514	3	Male	96	1	2	Manufacturing Director	2	Married	6549	3173	1	Y	No	14	3	2	80	2	8	2	2	8	6	1	2
32	No	Travel_Rarely	495	Research & Development	10	3	Medical	1	1516	3	Male	64	3	3	Manager	4	Single	11244	21072	2	Y	No	25	4	2	80	0	10	5	4	5	2	0	0
23	No	Travel_Rarely	507	Research & Development	20	1	Life Sciences	1	1533	1	Male	97	3	2	Laboratory Technician	3	Single	2272	24812	0	Y	No	14	3	2	80	0	5	2	3	4	3	1	0
40	Yes	Travel_Rarely	676	Research & Development	9	4	Life Sciences	1	1534	4	Male	86	3	1	Laboratory Technician	1	Single	2018	21831	3	Y	No	14	3	2	80	0	15	3	1	5	4	1	7
34	No	Travel_Rarely	1440	Sales	7	2	Technical Degree	1	1541	2	Male	55	3	1	Sales Representative	3	Married	2308	4944	0	Y	Yes	25	4	2	80	1	12	4	3	11	10	5	2
42	No	Travel_Rarely	1210	Research & Development	2	3	Medical	1	1542	3	Male	68	2	1	Laboratory Technician	2	Married	4841	24052	4	Y	No	14	3	2	80	1	4	3	3	1	0	0	2
33	No	Travel_Rarely	589	Research & Development	28	4	Life Sciences	1	1549	2	Male	79	3	2	Laboratory Technician	3	Married	5207	22949	1	Y	Yes	12	3	2	80	1	15	3	3	15	14	5	6
24	No	Travel_Rarely	350	Research & Development	21	2	Technical Degree	1	1551	3	Male	57	2	1	Laboratory Technician	1	Divorced	2296	10036	0	Y	No	14	3	2	80	3	2	3	3	1	1	0	2
35	No	Travel_Rarely	992	Research & Development	1	3	Medical	1	1564	4	Male	68	2	1	Laboratory Technician	1	Single	2450	21731	1	Y	No	19	3	2	80	0	3	3	3	3	0	1	2
30	No	Travel_Rarely	1288	Sales	29	4	Technical Degree	1	1568	3	Male	33	3	3	Sales Executive	2	Married	9250	17799	3	Y	No	12	3	2	80	1	9	3	3	4	2	1	1
53	Yes	Travel_Rarely	607	Research & Development	2	5	Technical Degree	1	1572	3	Female	78	2	3	Manufacturing Director	4	Married	10169	14618	0	Y	No	16	3	2	80	1	34	4	3	33	7	1	2
32	No	Non-Travel	1200	Research & Development	1	4	Technical Degree	1	1574	4	Male	62	3	2	Research Scientist	1	Married	4087	25174	4	Y	No	14	3	2	80	1	9	3	2	6	5	1	2
34	No	Travel_Rarely	1351	Research & Development	1	4	Life Sciences	1	1580	2	Male	45	3	2	Research Scientist	4	Married	5484	13008	9	Y	No	17	3	2	80	1	9	3	2	2	2	2	5
38	No	Travel_Rarely	437	Sales	16	3	Life Sciences	1	1583	2	Female	90	3	2	Sales Executive	2	Single	4198	16379	2	Y	No	12	3	2	80	0	8	5	4	3	2	1	0
34	No	Travel_Frequently	653	Research & Development	10	4	Technical Degree	1	1597	4	Male	92	2	2	Healthcare Representative	3	Married	5063	15332	1	Y	No	14	3	2	80	1	8	3	2	8	2	7	10
46	No	Travel_Rarely	563	Sales	1	4	Life Sciences	1	1602	4	Male	56	4	4	Manager	1	Single	17567	3156	1	Y	No	15	3	2	80	0	27	5	1	26	0	0	8
22	No	Non-Travel	457	Research & Development	26	2	Other	1	1605	2	Female	85	2	1	Research Scientist	3	Married	2814	10293	1	Y	Yes	14	3	2	80	0	4	2	2	4	2	1	0
30	No	Travel_Rarely	241	Research & Development	7	3	Medical	1	1609	2	Male	48	2	1	Research Scientist	2	Married	2141	5348	1	Y	No	12	3	2	80	1	6	3	2	6	4	1	2
36	No	Travel_Rarely	559	Research & Development	12	4	Life Sciences	1	1614	3	Female	76	3	2	Manufacturing Director	3	Married	4663	12421	9	Y	Yes	12	3	2	80	2	7	2	3	3	2	1	8
28	No	Travel_Rarely	580	Research & Development	27	3	Medical	1	1622	2	Female	39	1	2	Manufacturing Director	1	Divorced	4877	20460	0	Y	No	21	4	2	80	1	6	5	2	5	3	0	2
48	No	Travel_Frequently	365	Research & Development	4	5	Medical	1	1644	3	Male	89	2	4	Manager	4	Married	15202	5602	2	Y	No	25	4	2	80	1	23	3	3	2	2	2	8
40	Yes	Travel_Rarely	1329	Research & Development	7	3	Life Sciences	1	1649	1	Male	73	3	1	Laboratory Technician	1	Single	2166	3339	3	Y	Yes	14	3	2	80	0	10	3	1	4	2	0	7
49	No	Travel_Rarely	301	Research & Development	22	4	Other	1	1655	1	Female	72	3	4	Research Director	2	Married	16413	3498	3	Y	No	16	3	2	80	2	27	2	3	4	2	1	1
49	No	Travel_Rarely	465	Research & Development	6	1	Life Sciences	1	1661	3	Female	41	2	4	Healthcare Representative	3	Married	13966	11652	2	Y	Yes	19	3	2	80	1	30	3	3	15	11	2	2
29	No	Travel_Rarely	991	Sales	5	3	Medical	1	1669	1	Male	43	2	2	Sales Executive	2	Divorced	4187	3356	1	Y	Yes	13	3	2	80	1	10	3	2	10	0	0	1
49	No	Travel_Rarely	464	Research & Development	16	3	Medical	1	1674	4	Female	74	3	1	Laboratory Technician	1	Divorced	2587	24941	4	Y	Yes	16	3	2	80	1	17	2	2	2	2	2	1
38	No	Travel_Frequently	148	Research & Development	2	3	Medical	1	1675	4	Female	42	2	1	Laboratory Technician	2	Single	2440	23826	1	Y	No	22	4	2	80	0	4	3	3	4	3	3	7
36	No	Travel_Rarely	1351	Research & Development	26	4	Life Sciences	1	1682	1	Male	80	3	2	Healthcare Representative	3	Married	5347	7419	6	Y	No	14	3	2	80	2	10	2	2	3	2	0	0
34	No	Travel_Rarely	678	Research & Development	19	3	Life Sciences	1	1701	2	Female	35	2	1	Research Scientist	4	Married	2929	20338	1	Y	No	12	3	2	80	0	10	3	3	10	9	8	2
23	Yes	Travel_Rarely	427	Sales	7	3	Life Sciences	1	1702	3	Male	99	3	1	Sales Representative	4	Divorced	2275	25103	1	Y	Yes	21	4	2	80	1	3	2	3	3	2	0	2
44	No	Travel_Rarely	921	Research & Development	2	3	Life Sciences	1	1703	3	Female	96	4	3	Healthcare Representative	4	Married	7879	14810	1	Y	Yes	19	3	2	80	1	9	2	3	8	7	6	5
41	No	Travel_Rarely	918	Sales	6	3	Marketing	1	1708	4	Male	35	3	3	Sales Executive	3	Single	9241	15869	1	Y	No	12	3	2	80	0	10	3	3	10	8	8	8
41	No	Non-Travel	552	Human Resources	4	3	Human Resources	1	1722	3	Male	60	1	2	Human Resources	2	Married	6430	20794	6	Y	No	19	3	2	80	1	10	4	3	3	2	1	2
40	No	Travel_Rarely	369	Research & Development	8	2	Life Sciences	1	1724	2	Female	92	3	2	Manufacturing Director	1	Married	6516	5041	2	Y	Yes	16	3	2	80	1	18	3	3	1	0	0	4
24	No	Travel_Rarely	506	Research & Development	29	1	Medical	1	1725	2	Male	91	3	1	Laboratory Technician	1	Divorced	3907	3622	1	Y	No	13	3	2	80	3	6	2	4	6	2	1	0
35	No	Travel_Rarely	1370	Research & Development	27	4	Life Sciences	1	1728	4	Male	49	3	2	Manufacturing Director	3	Married	6883	5151	2	Y	No	16	3	2	80	1	17	3	3	7	7	0	8
30	No	Travel_Rarely	793	Research & Development	16	1	Life Sciences	1	1729	2	Male	33	3	1	Research Scientist	4	Married	2862	3811	1	Y	No	12	3	2	80	1	10	2	2	10	0	0	7
46	No	Travel_Rarely	1277	Sales	2	3	Life Sciences	1	1732	3	Male	74	3	3	Sales Executive	4	Divorced	10368	5596	4	Y	Yes	12	3	2	80	1	13	5	2	10	6	0	0
36	Yes	Travel_Rarely	1456	Sales	13	5	Marketing	1	1733	2	Male	96	2	2	Sales Executive	1	Divorced	6134	8658	5	Y	Yes	13	3	2	80	3	16	3	3	2	2	2	10
32	Yes	Travel_Rarely	964	Sales	1	2	Life Sciences	1	1734	1	Male	34	1	2	Sales Executive	2	Single	6735	12147	6	Y	No	15	3	2	80	0	10	2	3	0	0	0	8
40	No	Travel_Rarely	611	Sales	7	4	Medical	1	1740	2	Male	88	3	5	Manager	2	Single	19833	4349	1	Y	No	14	3	2	80	0	21	3	2	21	8	12	3
38	No	Travel_Frequently	594	Research & Development	2	2	Medical	1	1760	3	Female	75	2	1	Laboratory Technician	2	Married	2468	15963	4	Y	No	14	3	2	80	1	9	4	2	6	1	0	8
32	No	Non-Travel	953	Research & Development	5	4	Technical Degree	1	1764	2	Male	65	3	1	Research Scientist	2	Single	2718	17674	2	Y	No	14	3	2	80	0	12	3	3	7	7	0	7
42	No	Travel_Rarely	855	Research & Development	12	3	Medical	1	1768	2	Male	57	3	1	Laboratory Technician	2	Divorced	2766	8952	8	Y	No	22	4	2	80	3	7	6	2	5	3	0	7
55	No	Travel_Rarely	478	Research & Development	2	3	Medical	1	1770	3	Male	60	2	5	Research Director	1	Married	19038	19805	8	Y	No	12	3	2	80	3	34	2	3	1	0	0	7
41	No	Travel_Rarely	548	Research & Development	9	4	Life Sciences	1	1772	3	Male	94	3	1	Laboratory Technician	1	Divorced	2289	20520	1	Y	No	20	4	2	80	2	5	2	3	5	3	0	12
43	No	Travel_Rarely	244	Human Resources	2	3	Life Sciences	1	1778	2	Male	97	3	1	Human Resources	4	Single	3539	5033	0	Y	No	13	3	2	80	0	10	5	3	9	7	1	3
21	Yes	Travel_Rarely	337	Sales	7	1	Marketing	1	1780	2	Male	31	3	1	Sales Representative	2	Single	2679	4567	1	Y	No	13	3	2	80	0	1	3	3	1	0	1	6
38	No	Travel_Rarely	1153	Research & Development	6	2	Other	1	1782	4	Female	40	2	1	Laboratory Technician	3	Married	3702	16376	1	Y	No	11	3	2	80	1	5	3	3	5	4	0	2
33	No	Travel_Rarely	867	Research & Development	8	4	Life Sciences	1	1798	4	Male	90	4	1	Research Scientist	1	Married	3143	6076	6	Y	No	19	3	2	80	1	14	1	3	10	8	7	7
37	Yes	Travel_Rarely	370	Research & Development	10	4	Medical	1	1809	4	Male	58	3	2	Manufacturing Director	1	Single	4213	4992	1	Y	No	15	3	2	80	0	10	4	1	10	3	0	10
30	No	Travel_Rarely	1092	Research & Development	10	3	Medical	1	1816	1	Female	64	3	3	Manufacturing Director	3	Single	9667	2739	9	Y	No	14	3	2	80	0	9	3	3	7	7	0	2
35	No	Travel_Rarely	185	Research & Development	23	4	Medical	1	1826	2	Male	91	1	1	Laboratory Technician	3	Married	2705	9696	0	Y	No	16	3	2	80	1	6	2	4	5	4	0	7
40	No	Travel_Rarely	750	Research & Development	12	3	Life Sciences	1	1829	2	Female	47	3	2	Healthcare Representative	1	Divorced	4448	10748	2	Y	No	12	3	2	80	1	15	3	3	7	4	7	5
54	No	Travel_Rarely	431	Research & Development	7	4	Medical	1	1830	4	Female	68	3	2	Research Scientist	4	Married	6854	15696	4	Y	No	15	3	2	80	1	14	2	2	7	1	1	0
58	No	Travel_Frequently	1216	Research & Development	15	4	Life Sciences	1	1837	1	Male	87	3	4	Research Director	3	Married	15787	21624	2	Y	Yes	14	3	2	80	0	23	3	3	2	2	2	4
45	No	Non-Travel	589	Sales	2	4	Life Sciences	1	1845	3	Female	67	3	2	Sales Executive	3	Married	5154	19665	4	Y	No	22	4	2	80	2	10	3	4	8	7	5	13
29	No	Travel_Frequently	574	Research & Development	20	1	Medical	1	1852	4	Male	40	3	1	Laboratory Technician	4	Married	3812	7003	1	Y	No	13	3	2	80	0	11	3	4	11	8	3	7
42	No	Non-Travel	355	Research & Development	10	4	Technical Degree	1	1854	3	Male	38	3	1	Research Scientist	3	Married	2936	6161	3	Y	No	22	4	2	80	2	10	1	2	6	3	3	0
28	No	Non-Travel	280	Human Resources	1	2	Life Sciences	1	1858	3	Male	43	3	1	Human Resources	4	Divorced	2706	10494	1	Y	No	15	3	2	80	1	3	2	3	3	2	2	2
29	Yes	Travel_Frequently	459	Research & Development	24	2	Life Sciences	1	1868	4	Male	73	2	1	Research Scientist	4	Single	2439	14753	1	Y	Yes	24	4	2	80	0	1	3	2	1	0	1	2
39	No	Travel_Rarely	835	Research & Development	19	4	Other	1	1871	4	Male	41	3	2	Research Scientist	4	Divorced	3902	5141	8	Y	No	14	3	2	80	3	7	2	3	2	2	2	3
55	No	Travel_Rarely	836	Research & Development	2	4	Technical Degree	1	1873	2	Male	98	2	1	Research Scientist	4	Married	2662	7975	8	Y	No	20	4	2	80	1	19	2	4	5	2	0	2
29	No	Travel_Rarely	592	Research & Development	7	3	Life Sciences	1	1883	4	Male	59	3	1	Laboratory Technician	1	Single	2062	19384	3	Y	No	14	3	2	80	0	11	2	3	3	2	1	6
27	No	Travel_Rarely	511	Sales	2	2	Medical	1	1898	1	Female	89	4	2	Sales Executive	3	Single	6500	26997	0	Y	No	14	3	2	80	0	9	5	2	8	7	0	1
48	No	Travel_Frequently	117	Research & Development	22	3	Medical	1	1900	4	Female	58	3	4	Manager	4	Divorced	17174	2437	3	Y	No	11	3	2	80	1	24	3	3	22	17	4	3
34	Yes	Non-Travel	967	Research & Development	16	4	Technical Degree	1	1905	4	Male	85	1	1	Research Scientist	1	Married	2307	14460	1	Y	Yes	23	4	2	80	1	5	2	3	5	2	3	7
42	No	Travel_Rarely	1396	Research & Development	6	3	Medical	1	1911	3	Male	83	3	3	Research Director	1	Married	13348	14842	9	Y	No	13	3	2	80	1	18	3	4	13	7	5	2
31	No	Travel_Rarely	471	Research & Development	4	3	Medical	1	1916	1	Female	62	4	1	Laboratory Technician	3	Divorced	3978	16031	8	Y	No	12	3	2	80	1	4	0	2	2	2	2	2
33	No	Travel_Rarely	217	Sales	10	4	Marketing	1	1924	2	Male	43	3	2	Sales Executive	3	Single	5487	10410	1	Y	No	14	3	2	80	0	10	2	2	10	4	0	0
34	No	Travel_Frequently	735	Research & Development	22	4	Other	1	1932	3	Male	86	2	2	Research Scientist	4	Married	5747	26496	1	Y	Yes	15	3	2	80	0	16	3	3	15	10	6	7
36	No	Non-Travel	1351	Research & Development	9	4	Life Sciences	1	1949	1	Male	66	4	1	Laboratory Technician	2	Married	2810	9238	1	Y	No	22	4	2	80	0	5	3	3	5	4	0	1
32	No	Non-Travel	1146	Research & Development	15	4	Medical	1	1955	3	Female	34	3	2	Healthcare Representative	4	Divorced	6667	16542	5	Y	No	18	3	2	80	1	9	6	3	5	1	1	0
31	No	Travel_Frequently	1125	Research & Development	1	3	Life Sciences	1	1956	4	Male	48	1	2	Research Scientist	1	Married	5003	5771	1	Y	No	21	4	2	80	0	10	6	3	10	8	8	16
32	No	Travel_Rarely	1373	Research & Development	5	4	Life Sciences	1	1966	4	Male	56	2	2	Manufacturing Director	4	Single	9679	10138	8	Y	No	24	4	2	80	0	8	1	3	1	0	0	8
53	Yes	Travel_Rarely	1168	Sales	24	4	Life Sciences	1	1968	1	Male	66	3	3	Sales Executive	1	Single	10448	5843	6	Y	Yes	13	3	2	80	0	15	2	2	2	2	2	4
43	No	Travel_Rarely	574	Research & Development	11	3	Life Sciences	1	1971	1	Male	30	3	3	Healthcare Representative	3	Married	7510	16873	1	Y	No	17	3	2	80	1	10	1	3	10	9	0	1
38	No	Travel_Frequently	1444	Human Resources	1	4	Other	1	1972	4	Male	88	3	1	Human Resources	2	Married	2991	5224	0	Y	Yes	11	3	2	80	1	7	2	3	6	2	1	2
24	No	Travel_Rarely	771	Research & Development	1	2	Life Sciences	1	1981	2	Male	45	2	2	Healthcare Representative	3	Single	4617	14120	1	Y	No	12	3	2	80	0	4	2	2	4	3	1	3
47	No	Travel_Rarely	1180	Research & Development	25	3	Medical	1	1993	1	Male	84	3	3	Healthcare Representative	3	Single	8633	13084	2	Y	No	23	4	2	80	0	25	3	3	17	14	12	4
35	No	Travel_Rarely	1395	Research & Development	9	4	Medical	1	2008	2	Male	48	3	2	Research Scientist	3	Single	5098	18698	1	Y	No	19	3	2	80	0	10	5	3	10	7	0	4
32	No	Travel_Rarely	234	Sales	1	4	Medical	1	2013	2	Male	68	2	1	Sales Representative	2	Married	2269	18024	0	Y	No	14	3	2	80	1	3	2	3	2	2	2	9
25	No	Travel_Rarely	1382	Sales	8	2	Other	1	2018	1	Female	85	3	2	Sales Executive	3	Divorced	4907	13684	0	Y	Yes	22	4	2	80	1	6	3	2	5	3	0	2
52	No	Non-Travel	585	Sales	29	4	Life Sciences	1	2019	1	Male	40	3	1	Sales Representative	4	Divorced	3482	19788	2	Y	No	15	3	2	80	2	16	3	2	9	8	0	0
36	No	Travel_Frequently	688	Research & Development	4	2	Life Sciences	1	2025	4	Female	97	3	2	Manufacturing Director	2	Divorced	5131	9192	7	Y	No	13	3	2	80	3	18	3	3	4	2	0	1
29	Yes	Travel_Rarely	1092	Research & Development	1	4	Medical	1	2027	1	Male	36	3	1	Research Scientist	4	Married	4787	26124	9	Y	Yes	14	3	2	80	3	4	3	4	2	2	2	2
40	No	Travel_Rarely	1194	Research & Development	2	4	Medical	1	2051	3	Female	98	3	1	Research Scientist	3	Married	2001	12549	2	Y	No	14	3	2	80	3	20	2	3	5	3	0	3
29	No	Travel_Rarely	468	Research & Development	28	4	Medical	1	2054	4	Female	73	2	1	Research Scientist	1	Single	3785	8489	1	Y	No	14	3	2	80	0	5	3	1	5	4	0	4
50	Yes	Travel_Rarely	410	Sales	28	3	Marketing	1	2055	4	Male	39	2	3	Sales Executive	1	Divorced	10854	16586	4	Y	Yes	13	3	2	80	1	20	3	3	3	2	2	1
31	No	Non-Travel	325	Research & Development	5	3	Medical	1	2057	2	Male	74	3	2	Manufacturing Director	1	Single	9936	3787	0	Y	No	19	3	2	80	0	10	2	3	9	4	1	3
27	No	Travel_Rarely	155	Research & Development	4	3	Life Sciences	1	2064	2	Male	87	4	2	Manufacturing Director	2	Married	6142	5174	1	Y	Yes	20	4	2	80	1	6	0	3	6	2	0	12
33	No	Travel_Frequently	1392	Research & Development	3	4	Life Sciences	1	5	4	Female	56	3	1	Research Scientist	3	Married	2909	23159	1	Y	Yes	11	3	3	80	0	8	3	3	8	7	3	3
32	No	Travel_Frequently	1005	Research & Development	2	2	Life Sciences	1	8	4	Male	79	3	1	Laboratory Technician	4	Single	3068	11864	0	Y	No	13	3	3	80	0	8	2	2	7	7	3	2
35	No	Travel_Rarely	809	Research & Development	16	3	Medical	1	14	1	Male	84	4	1	Laboratory Technician	2	Married	2426	16479	0	Y	No	13	3	3	80	1	6	5	3	5	4	0	2
34	No	Travel_Rarely	1346	Research & Development	19	2	Medical	1	18	2	Male	93	3	1	Laboratory Technician	4	Divorced	2661	8758	0	Y	No	11	3	3	80	1	3	2	3	2	2	1	7
29	No	Travel_Rarely	1389	Research & Development	21	4	Life Sciences	1	20	2	Female	51	4	3	Manufacturing Director	1	Divorced	9980	10195	1	Y	No	11	3	3	80	1	10	1	3	10	9	8	2
53	No	Travel_Rarely	1219	Sales	2	4	Life Sciences	1	23	1	Female	78	2	4	Manager	4	Married	15427	22021	2	Y	No	16	3	3	80	0	31	3	3	25	8	3	9
38	No	Travel_Rarely	371	Research & Development	2	3	Life Sciences	1	24	4	Male	45	3	1	Research Scientist	4	Single	3944	4306	5	Y	Yes	11	3	3	80	0	6	3	3	3	2	1	0
34	No	Travel_Rarely	419	Research & Development	7	4	Life Sciences	1	28	1	Female	53	3	3	Research Director	2	Single	11994	21293	0	Y	No	11	3	3	80	0	13	4	3	12	6	2	0
34	Yes	Travel_Rarely	699	Research & Development	6	1	Medical	1	31	2	Male	83	3	1	Research Scientist	1	Single	2960	17102	2	Y	No	11	3	3	80	0	8	2	3	4	2	1	4
39	Yes	Travel_Rarely	895	Sales	5	3	Technical Degree	1	42	4	Male	56	3	2	Sales Representative	4	Married	2086	3335	3	Y	No	14	3	3	80	1	19	6	4	1	0	0	3
50	Yes	Travel_Rarely	869	Sales	3	2	Marketing	1	47	1	Male	86	2	1	Sales Representative	3	Married	2683	3810	1	Y	Yes	14	3	3	80	0	3	2	3	3	2	0	0
35	No	Travel_Rarely	464	Research & Development	4	2	Other	1	53	3	Male	75	3	1	Laboratory Technician	4	Divorced	1951	10910	1	Y	No	12	3	3	80	1	1	3	3	1	0	0	7
26	Yes	Travel_Rarely	1357	Research & Development	25	3	Life Sciences	1	55	1	Male	48	1	1	Laboratory Technician	3	Single	2293	10558	1	Y	No	12	3	3	80	0	1	2	2	1	0	0	2
34	No	Non-Travel	1065	Sales	23	4	Marketing	1	60	2	Male	72	3	2	Sales Executive	3	Single	4568	10034	0	Y	No	20	4	3	80	0	10	2	3	9	5	8	0
46	No	Travel_Frequently	1211	Sales	5	4	Marketing	1	62	1	Male	98	3	2	Sales Executive	4	Single	5772	20445	4	Y	Yes	21	4	3	80	0	14	4	3	9	6	0	5
28	Yes	Travel_Rarely	1434	Research & Development	5	4	Technical Degree	1	65	3	Male	50	3	1	Laboratory Technician	3	Single	3441	11179	1	Y	Yes	13	3	3	80	0	2	3	2	2	2	2	7
44	No	Travel_Rarely	1488	Sales	1	5	Marketing	1	68	2	Female	75	3	2	Sales Executive	1	Divorced	5454	4009	5	Y	Yes	21	4	3	80	1	9	2	2	4	3	1	8
35	No	Non-Travel	1097	Research & Development	11	2	Medical	1	70	3	Male	79	2	3	Healthcare Representative	1	Married	9884	8302	2	Y	Yes	13	3	3	80	1	10	3	3	4	0	2	2
26	No	Travel_Rarely	1443	Sales	23	3	Marketing	1	72	3	Female	47	2	2	Sales Executive	4	Married	4157	21436	7	Y	Yes	19	3	3	80	1	5	2	2	2	2	0	2
33	No	Travel_Frequently	515	Research & Development	1	2	Life Sciences	1	73	1	Female	98	3	3	Research Director	4	Single	13458	15146	1	Y	Yes	12	3	3	80	0	15	1	3	15	14	8	1
35	No	Travel_Rarely	1142	Research & Development	23	4	Medical	1	75	3	Female	30	3	1	Laboratory Technician	1	Married	4014	16002	3	Y	Yes	15	3	3	80	1	4	3	3	2	2	2	4
37	No	Travel_Rarely	1115	Research & Development	1	4	Life Sciences	1	77	1	Male	51	2	2	Manufacturing Director	3	Divorced	5993	2689	1	Y	No	18	3	3	80	1	7	2	4	7	5	0	8
55	No	Travel_Rarely	836	Research & Development	8	3	Medical	1	84	4	Female	33	3	4	Manager	3	Divorced	14756	19730	2	Y	Yes	14	3	3	80	3	21	2	3	5	0	0	0
36	No	Travel_Frequently	1195	Research & Development	11	3	Life Sciences	1	85	2	Male	95	2	2	Manufacturing Director	2	Single	6499	22656	1	Y	No	13	3	3	80	0	6	3	3	6	5	0	0
45	No	Travel_Rarely	1339	Research & Development	7	3	Life Sciences	1	86	2	Male	59	3	3	Research Scientist	1	Divorced	9724	18787	2	Y	No	17	3	3	80	1	25	2	3	1	0	0	0
30	No	Travel_Rarely	852	Research & Development	1	1	Life Sciences	1	104	4	Male	55	2	2	Laboratory Technician	4	Married	5126	15998	1	Y	Yes	12	3	3	80	2	10	1	2	10	8	3	8
34	No	Travel_Rarely	1153	Research & Development	1	2	Medical	1	110	1	Male	94	3	2	Manufacturing Director	2	Married	4325	17736	1	Y	No	15	3	3	80	0	5	2	3	5	2	1	2
23	No	Travel_Rarely	541	Sales	2	1	Technical Degree	1	113	3	Male	62	3	1	Sales Representative	1	Divorced	2322	9518	3	Y	No	13	3	3	80	1	3	3	3	0	0	0	3
46	No	Travel_Frequently	638	Research & Development	1	3	Medical	1	124	3	Male	40	2	3	Healthcare Representative	1	Married	10673	3142	2	Y	Yes	13	3	3	80	1	21	5	2	10	9	9	7
58	No	Travel_Rarely	682	Sales	10	4	Medical	1	131	4	Male	37	3	4	Sales Executive	3	Single	13872	24409	0	Y	No	13	3	3	80	0	38	1	2	37	10	1	3
44	No	Non-Travel	489	Research & Development	23	3	Medical	1	132	2	Male	67	3	2	Laboratory Technician	2	Married	2042	25043	4	Y	No	12	3	3	80	1	17	3	4	3	2	1	0
34	No	Travel_Rarely	665	Research & Development	6	4	Other	1	138	1	Female	41	3	2	Research Scientist	3	Single	4809	12482	1	Y	No	14	3	3	80	0	16	3	3	16	13	2	8
25	No	Travel_Rarely	1280	Research & Development	7	1	Medical	1	143	4	Male	64	2	1	Research Scientist	4	Married	2889	26897	1	Y	No	11	3	3	80	2	2	2	3	2	2	2	6
22	No	Travel_Rarely	534	Research & Development	15	3	Medical	1	144	2	Female	59	3	1	Laboratory Technician	4	Single	2871	23785	1	Y	No	15	3	3	80	0	1	5	3	0	0	0	5
51	No	Travel_Frequently	1456	Research & Development	1	4	Medical	1	145	1	Female	30	2	3	Healthcare Representative	1	Single	7484	25796	3	Y	No	20	4	3	80	0	23	1	2	13	12	12	2
54	No	Non-Travel	142	Human Resources	26	3	Human Resources	1	148	4	Female	30	4	4	Manager	4	Single	17328	13871	2	Y	Yes	12	3	3	80	0	23	3	3	5	3	4	7
24	No	Travel_Rarely	1127	Research & Development	18	1	Life Sciences	1	150	2	Male	52	3	1	Laboratory Technician	3	Married	2774	13257	0	Y	No	12	3	3	80	1	6	2	3	5	3	1	0
34	No	Travel_Rarely	1031	Research & Development	6	4	Life Sciences	1	151	3	Female	45	2	2	Research Scientist	2	Divorced	4505	15000	6	Y	No	15	3	3	80	1	12	3	3	1	0	0	17
36	No	Travel_Frequently	1467	Sales	11	2	Technical Degree	1	154	2	Female	92	3	3	Sales Executive	4	Married	9738	22952	0	Y	No	14	3	3	80	1	10	6	3	9	7	2	3
30	No	Travel_Frequently	1312	Research & Development	23	3	Life Sciences	1	159	1	Male	96	1	1	Research Scientist	3	Divorced	2613	22310	1	Y	No	25	4	3	80	3	10	2	2	10	7	0	1
51	No	Travel_Rarely	684	Research & Development	6	3	Life Sciences	1	162	1	Male	51	3	5	Research Director	3	Single	19537	6462	7	Y	No	13	3	3	80	0	23	5	3	20	18	15	8
26	No	Travel_Rarely	841	Research & Development	6	3	Other	1	164	3	Female	46	2	1	Research Scientist	2	Married	2368	23300	1	Y	No	19	3	3	80	0	5	3	2	5	4	4	1
22	No	Travel_Rarely	594	Research & Development	2	1	Technical Degree	1	169	3	Male	100	3	1	Laboratory Technician	4	Married	2523	19299	0	Y	No	14	3	3	80	1	3	2	3	2	1	2	11
49	No	Travel_Rarely	470	Research & Development	20	4	Medical	1	170	3	Female	96	3	2	Manufacturing Director	1	Married	6567	5549	1	Y	No	14	3	3	80	0	16	2	2	15	11	5	3
31	Yes	Travel_Rarely	542	Sales	20	3	Life Sciences	1	175	2	Female	71	1	2	Sales Executive	3	Married	4559	24788	3	Y	Yes	11	3	3	80	1	4	2	3	2	2	2	3
41	No	Travel_Rarely	802	Sales	9	1	Life Sciences	1	176	3	Male	96	3	3	Sales Executive	3	Divorced	8189	21196	3	Y	Yes	13	3	3	80	1	12	2	3	9	7	0	4
39	No	Travel_Rarely	1329	Sales	4	4	Life Sciences	1	182	4	Female	47	2	2	Sales Executive	3	Married	5902	14590	4	Y	No	14	3	3	80	1	17	1	4	15	11	5	2
30	No	Travel_Rarely	438	Research & Development	18	3	Life Sciences	1	194	1	Female	75	3	1	Research Scientist	3	Single	2632	23910	1	Y	No	14	3	3	80	0	5	4	2	5	4	0	3
45	No	Travel_Rarely	194	Research & Development	9	3	Life Sciences	1	206	2	Male	60	3	2	Laboratory Technician	2	Divorced	2348	10901	8	Y	No	18	3	3	80	1	20	2	1	17	9	0	0
51	No	Travel_Rarely	1169	Research & Development	7	4	Medical	1	211	2	Male	34	2	2	Manufacturing Director	3	Married	6132	13983	2	Y	No	17	3	3	80	0	10	2	3	1	0	0	0
28	No	Travel_Rarely	440	Research & Development	21	3	Medical	1	221	3	Male	42	3	1	Research Scientist	4	Married	2713	6672	1	Y	No	11	3	3	80	1	5	2	1	5	2	0	4
30	No	Travel_Rarely	1339	Sales	5	3	Life Sciences	1	228	2	Female	41	3	3	Sales Executive	4	Married	9419	8053	2	Y	No	12	3	3	80	1	12	2	3	10	9	7	2
38	No	Travel_Rarely	702	Sales	1	4	Life Sciences	1	230	1	Female	59	2	2	Sales Executive	4	Single	8686	12930	4	Y	No	22	4	3	80	0	12	2	4	8	3	0	2
36	No	Travel_Frequently	1480	Research & Development	3	2	Medical	1	238	4	Male	30	3	1	Laboratory Technician	2	Single	2088	15062	4	Y	No	12	3	3	80	0	13	3	2	8	7	7	2
30	No	Non-Travel	111	Research & Development	9	3	Medical	1	239	3	Male	66	3	2	Laboratory Technician	1	Divorced	3072	11012	1	Y	No	11	3	3	80	2	12	4	3	12	9	6	3
56	No	Travel_Rarely	713	Research & Development	8	3	Life Sciences	1	241	3	Female	67	3	1	Research Scientist	1	Divorced	4257	13939	4	Y	Yes	18	3	3	80	1	19	3	3	2	2	2	3
19	Yes	Travel_Rarely	303	Research & Development	2	3	Life Sciences	1	243	2	Male	47	2	1	Laboratory Technician	4	Single	1102	9241	1	Y	No	22	4	3	80	0	1	3	2	1	0	1	15
46	No	Travel_Rarely	526	Sales	1	2	Marketing	1	244	2	Female	92	3	3	Sales Executive	1	Divorced	10453	2137	1	Y	No	25	4	3	80	3	24	2	3	24	13	15	8
38	No	Travel_Rarely	1380	Research & Development	9	2	Life Sciences	1	245	3	Female	75	3	1	Laboratory Technician	4	Single	2288	6319	1	Y	No	12	3	3	80	0	2	3	3	2	2	2	2
31	No	Travel_Rarely	140	Research & Development	12	1	Medical	1	246	3	Female	95	3	1	Research Scientist	4	Married	3929	6984	8	Y	Yes	23	4	3	80	1	7	0	3	4	2	0	3
53	No	Travel_Rarely	1084	Research & Development	13	2	Medical	1	250	4	Female	57	4	2	Manufacturing Director	1	Divorced	4450	26250	1	Y	No	11	3	3	80	2	5	3	3	4	2	1	2
34	No	Travel_Frequently	1069	Research & Development	2	1	Life Sciences	1	256	4	Male	45	2	2	Manufacturing Director	3	Married	9547	14074	1	Y	No	17	3	3	80	0	10	2	2	10	9	1	4
51	No	Travel_Rarely	313	Research & Development	3	3	Medical	1	258	4	Female	98	3	4	Healthcare Representative	2	Single	13734	7192	3	Y	No	18	3	3	80	0	21	6	3	7	7	1	3
27	No	Travel_Frequently	472	Research & Development	1	1	Technical Degree	1	274	3	Male	60	2	2	Manufacturing Director	1	Married	4298	9679	5	Y	No	19	3	3	80	1	6	1	3	2	2	2	2
40	No	Travel_Rarely	905	Research & Development	19	2	Medical	1	281	3	Male	99	3	2	Laboratory Technician	4	Married	2741	16523	8	Y	Yes	15	3	3	80	1	15	2	4	7	2	3	3
46	No	Travel_Rarely	644	Research & Development	1	4	Medical	1	288	4	Male	97	3	3	Healthcare Representative	1	Divorced	9396	12368	7	Y	No	16	3	3	80	1	17	3	3	4	2	0	2
32	Yes	Travel_Rarely	1045	Sales	4	4	Medical	1	291	4	Male	32	1	3	Sales Executive	4	Married	10400	25812	1	Y	No	11	3	3	80	0	14	2	2	14	8	9	2
30	No	Non-Travel	829	Research & Development	1	1	Life Sciences	1	292	3	Male	88	2	3	Manufacturing Director	3	Single	8474	20925	1	Y	No	22	4	3	80	0	12	2	3	11	8	5	2
30	Yes	Travel_Rarely	1005	Research & Development	3	3	Technical Degree	1	297	4	Female	88	3	1	Research Scientist	1	Single	2657	8556	5	Y	Yes	11	3	3	80	0	8	5	3	5	2	0	8
41	No	Travel_Rarely	896	Sales	6	3	Life Sciences	1	298	4	Female	75	3	3	Manager	4	Single	13591	14674	3	Y	Yes	18	3	3	80	0	16	3	3	1	0	0	0
30	Yes	Travel_Frequently	334	Sales	26	4	Marketing	1	299	3	Female	52	2	2	Sales Executive	1	Single	6696	22967	5	Y	No	15	3	3	80	0	9	5	2	6	3	0	8
37	No	Travel_Frequently	663	Research & Development	11	3	Other	1	306	2	Male	47	3	3	Research Director	4	Divorced	12185	10056	1	Y	Yes	14	3	3	80	3	10	1	3	10	8	0	2
38	No	Travel_Rarely	119	Sales	3	3	Life Sciences	1	307	1	Male	76	3	3	Sales Executive	3	Divorced	10609	9647	0	Y	No	12	3	3	80	2	17	6	2	16	10	5	7
37	No	Travel_Frequently	319	Sales	4	4	Marketing	1	311	1	Male	41	3	1	Sales Representative	4	Divorced	2793	2539	4	Y	No	17	3	3	80	1	13	2	3	9	8	5	9
29	Yes	Travel_Rarely	896	Research & Development	18	1	Medical	1	315	3	Male	86	2	1	Research Scientist	4	Single	2389	14961	1	Y	Yes	13	3	3	80	0	4	3	2	4	3	0	7
50	No	Travel_Rarely	854	Sales	1	4	Medical	1	323	4	Female	68	3	5	Manager	4	Divorced	19517	24118	3	Y	No	11	3	3	80	1	32	3	2	7	0	0	4
33	Yes	Travel_Rarely	813	Research & Development	14	3	Medical	1	325	3	Male	58	3	1	Laboratory Technician	4	Married	2436	22149	5	Y	Yes	13	3	3	80	1	8	2	1	5	4	0	3
43	No	Travel_Rarely	1034	Sales	16	3	Marketing	1	327	4	Female	80	3	4	Manager	4	Married	16064	7744	5	Y	Yes	22	4	3	80	1	22	3	3	17	13	1	1
39	No	Travel_Rarely	1431	Research & Development	1	4	Medical	1	332	3	Female	96	3	1	Laboratory Technician	3	Divorced	2232	15417	7	Y	No	14	3	3	80	3	7	1	3	3	2	1	3
45	No	Travel_Rarely	252	Research & Development	1	3	Other	1	336	3	Male	70	4	5	Manager	4	Married	19202	15970	0	Y	No	11	3	3	80	1	25	2	3	24	0	1	1
33	No	Travel_Rarely	832	Research & Development	5	4	Life Sciences	1	338	3	Female	63	2	1	Research Scientist	4	Married	2911	14776	1	Y	No	13	3	3	80	1	2	2	2	2	2	0	2
42	No	Travel_Rarely	916	Research & Development	17	2	Life Sciences	1	347	4	Female	82	4	2	Research Scientist	1	Single	6545	23016	3	Y	Yes	13	3	3	80	0	10	1	3	3	2	0	0
42	No	Travel_Rarely	269	Research & Development	2	3	Medical	1	351	4	Female	56	2	1	Laboratory Technician	1	Divorced	2593	8007	0	Y	Yes	11	3	3	80	1	10	4	3	9	6	7	0
32	No	Travel_Frequently	1311	Research & Development	7	3	Life Sciences	1	359	2	Male	100	4	1	Laboratory Technician	2	Married	2794	26062	1	Y	No	20	4	3	80	0	5	3	1	5	1	0	2
28	Yes	Travel_Rarely	529	Research & Development	2	4	Life Sciences	1	364	1	Male	79	3	1	Laboratory Technician	3	Single	3485	14935	2	Y	No	11	3	3	80	0	5	5	1	0	0	0	0
36	No	Travel_Rarely	1403	Research & Development	6	3	Life Sciences	1	373	4	Male	47	3	1	Laboratory Technician	4	Married	3210	20251	0	Y	No	11	3	3	80	1	16	4	3	15	13	10	11
55	No	Travel_Rarely	452	Research & Development	1	3	Medical	1	374	4	Male	81	3	5	Manager	1	Single	19045	18938	0	Y	Yes	14	3	3	80	0	37	2	3	36	10	4	2
38	No	Travel_Rarely	322	Sales	7	2	Medical	1	382	1	Female	44	4	2	Sales Executive	1	Divorced	5605	19191	1	Y	Yes	24	4	3	80	1	8	3	3	8	0	7	2
42	No	Travel_Rarely	635	Sales	1	1	Life Sciences	1	387	2	Male	99	3	2	Sales Executive	3	Married	4907	24532	1	Y	No	25	4	3	80	0	20	3	3	20	16	11	0
26	No	Travel_Frequently	496	Research & Development	11	2	Medical	1	390	1	Male	60	3	2	Healthcare Representative	1	Married	4741	22722	1	Y	Yes	13	3	3	80	1	5	3	3	5	3	3	2
31	No	Travel_Frequently	444	Sales	5	3	Marketing	1	399	4	Female	84	3	1	Sales Representative	2	Divorced	2789	3909	1	Y	No	11	3	3	80	1	2	5	2	2	2	2	2
37	No	Travel_Frequently	889	Research & Development	9	3	Medical	1	403	2	Male	53	3	1	Research Scientist	4	Married	2326	11411	1	Y	Yes	12	3	3	80	3	4	3	2	4	2	1	0
18	Yes	Travel_Rarely	230	Research & Development	3	3	Life Sciences	1	405	3	Male	54	3	1	Laboratory Technician	3	Single	1420	25233	1	Y	No	13	3	3	80	0	0	2	3	0	0	0	0
35	No	Travel_Rarely	1232	Sales	16	3	Marketing	1	406	3	Male	96	3	3	Sales Executive	2	Married	8020	5100	0	Y	No	15	3	3	80	2	12	3	2	11	9	6	3
28	No	Travel_Rarely	1476	Research & Development	16	2	Medical	1	412	2	Male	68	4	2	Healthcare Representative	1	Single	5661	4824	0	Y	No	19	3	3	80	0	9	2	3	8	3	0	2
36	No	Non-Travel	1105	Research & Development	24	4	Life Sciences	1	419	2	Female	47	3	2	Laboratory Technician	2	Married	5674	6927	7	Y	No	15	3	3	80	1	11	3	3	9	8	0	4
32	No	Travel_Rarely	906	Sales	7	3	Life Sciences	1	420	4	Male	91	2	2	Sales Executive	3	Married	5484	16985	1	Y	No	14	3	3	80	1	13	3	2	13	8	4	2
38	No	Travel_Rarely	849	Research & Development	25	2	Life Sciences	1	421	1	Female	81	2	3	Research Director	2	Married	12061	26707	3	Y	No	17	3	3	80	1	19	2	3	10	8	0	7
31	No	Travel_Rarely	691	Research & Development	5	4	Technical Degree	1	423	3	Male	86	3	1	Research Scientist	4	Married	4821	10077	0	Y	Yes	12	3	3	80	1	6	4	3	5	2	0	7
32	No	Travel_Rarely	1018	Research & Development	2	4	Medical	1	439	1	Female	74	4	2	Research Scientist	4	Single	5055	10557	7	Y	No	16	3	3	80	0	10	0	2	7	7	0	0
33	No	Travel_Frequently	508	Sales	10	3	Marketing	1	446	2	Male	46	2	2	Sales Executive	4	Single	4682	4317	3	Y	No	14	3	3	80	0	9	6	2	7	7	0	0
40	No	Travel_Rarely	1124	Sales	1	2	Medical	1	453	2	Male	57	1	2	Sales Executive	4	Married	7457	13273	2	Y	Yes	22	4	3	80	3	6	2	2	4	3	0	1
29	No	Travel_Rarely	738	Research & Development	9	5	Other	1	455	2	Male	30	2	1	Laboratory Technician	4	Single	3983	7621	0	Y	No	17	3	3	80	0	4	2	3	3	2	2	11
30	No	Travel_Rarely	570	Sales	5	3	Marketing	1	456	4	Female	30	2	2	Sales Executive	3	Divorced	6118	5431	1	Y	No	13	3	3	80	3	10	2	3	10	9	1	2
37	No	Travel_Rarely	1192	Research & Development	5	2	Medical	1	460	4	Male	61	3	2	Manufacturing Director	4	Divorced	6347	23177	7	Y	No	16	3	3	80	2	8	2	2	6	2	0	0
31	No	Travel_Rarely	1232	Research & Development	7	4	Medical	1	462	3	Female	39	3	3	Manufacturing Director	4	Single	7143	25713	1	Y	Yes	14	3	3	80	0	11	2	2	11	9	4	0
23	No	Travel_Rarely	1309	Research & Development	26	1	Life Sciences	1	465	3	Male	83	3	1	Research Scientist	4	Divorced	2904	16092	1	Y	No	12	3	3	80	2	4	2	2	4	2	0	7
42	No	Travel_Rarely	544	Human Resources	2	1	Technical Degree	1	470	3	Male	52	3	1	Human Resources	3	Divorced	2696	24017	0	Y	Yes	11	3	3	80	1	4	5	3	3	2	1	17
32	No	Travel_Rarely	1062	Research & Development	2	3	Medical	1	471	3	Female	75	3	1	Laboratory Technician	2	Married	2370	3956	1	Y	No	13	3	3	80	1	8	4	3	8	0	0	9
21	Yes	Travel_Frequently	756	Sales	1	1	Technical Degree	1	478	1	Female	99	2	1	Sales Representative	2	Single	2174	9150	1	Y	Yes	11	3	3	80	0	3	3	3	3	2	1	0
57	No	Travel_Rarely	593	Research & Development	1	4	Medical	1	482	4	Male	88	3	2	Healthcare Representative	3	Married	6755	2967	2	Y	No	11	3	3	80	0	15	2	3	3	2	1	0
40	No	Travel_Rarely	1171	Research & Development	10	4	Life Sciences	1	483	4	Female	46	4	1	Laboratory Technician	3	Married	2213	22495	3	Y	Yes	13	3	3	80	1	10	3	3	7	7	1	5
21	No	Non-Travel	895	Sales	9	2	Medical	1	484	1	Male	39	3	1	Sales Representative	4	Single	2610	2851	1	Y	No	24	4	3	80	0	3	3	2	3	2	2	0
46	No	Non-Travel	1144	Research & Development	7	4	Medical	1	487	3	Female	30	3	2	Manufacturing Director	3	Married	5258	16044	2	Y	No	14	3	3	80	0	7	2	4	1	0	0	3
41	Yes	Travel_Frequently	143	Sales	4	3	Marketing	1	488	1	Male	56	3	2	Sales Executive	2	Single	9355	9558	1	Y	No	18	3	3	80	0	8	5	3	8	7	7	7
35	No	Travel_Rarely	755	Research & Development	9	4	Life Sciences	1	496	3	Male	97	2	2	Healthcare Representative	2	Single	6540	19394	9	Y	No	19	3	3	80	0	10	5	3	1	1	0	4
49	No	Travel_Rarely	1261	Research & Development	7	3	Other	1	499	2	Male	31	2	3	Healthcare Representative	3	Single	10965	12066	8	Y	No	24	4	3	80	0	26	2	3	5	2	0	7
51	No	Travel_Rarely	1178	Sales	14	2	Life Sciences	1	500	3	Female	87	3	2	Sales Executive	4	Married	4936	14862	4	Y	No	11	3	3	80	1	18	2	2	7	7	0	8
55	No	Travel_Rarely	1311	Research & Development	2	3	Life Sciences	1	505	3	Female	97	3	4	Manager	4	Single	16659	23258	2	Y	Yes	13	3	3	80	0	30	2	3	5	4	1	2
26	Yes	Travel_Frequently	575	Research & Development	3	1	Technical Degree	1	510	3	Male	73	3	1	Research Scientist	1	Single	3102	6582	0	Y	No	22	4	3	80	0	7	2	3	6	4	0	0
30	Yes	Travel_Frequently	464	Research & Development	4	3	Technical Degree	1	514	3	Male	40	3	1	Research Scientist	4	Single	2285	3427	9	Y	Yes	23	4	3	80	0	3	4	3	1	0	0	8
37	No	Travel_Rarely	1107	Research & Development	14	3	Life Sciences	1	515	4	Female	95	3	1	Laboratory Technician	1	Divorced	3034	26914	1	Y	No	12	3	3	80	1	18	2	2	18	7	12	0
40	No	Travel_Rarely	759	Sales	2	2	Marketing	1	516	4	Female	46	3	2	Sales Executive	2	Divorced	5715	22553	7	Y	No	12	3	3	80	2	8	5	3	5	4	1	2
43	No	Travel_Rarely	982	Research & Development	12	3	Life Sciences	1	520	1	Male	59	2	4	Research Director	2	Divorced	14336	4345	1	Y	No	11	3	3	80	1	25	3	3	25	10	3	7
54	No	Travel_Rarely	821	Research & Development	5	2	Medical	1	522	1	Male	86	3	5	Research Director	1	Married	19406	8509	4	Y	No	11	3	3	80	1	24	4	2	4	2	1	3
31	No	Travel_Rarely	329	Research & Development	1	2	Life Sciences	1	530	4	Male	98	2	1	Laboratory Technician	1	Married	2218	16193	1	Y	No	12	3	3	80	1	4	3	3	4	2	3	8
39	No	Travel_Frequently	1218	Research & Development	1	1	Life Sciences	1	531	2	Male	52	3	5	Manager	3	Divorced	19197	8213	1	Y	Yes	14	3	3	80	1	21	3	3	21	8	1	7
41	No	Travel_Rarely	645	Sales	1	3	Marketing	1	534	2	Male	49	4	3	Sales Executive	1	Married	8392	19566	1	Y	No	16	3	3	80	1	10	2	3	10	7	0	0
25	Yes	Travel_Rarely	688	Research & Development	3	3	Medical	1	538	1	Male	91	3	1	Laboratory Technician	1	Married	4031	9396	5	Y	No	13	3	3	80	1	6	5	3	2	2	0	7
52	No	Travel_Rarely	319	Research & Development	3	3	Medical	1	543	4	Male	39	2	3	Manufacturing Director	3	Married	7969	19609	2	Y	Yes	14	3	3	80	0	28	4	3	5	4	0	7
30	No	Travel_Rarely	317	Research & Development	2	3	Life Sciences	1	548	3	Female	43	1	2	Manufacturing Director	4	Single	6091	24793	2	Y	No	20	4	3	80	0	11	2	3	5	4	0	2
46	No	Travel_Rarely	1485	Research & Development	18	3	Medical	1	550	3	Female	87	3	2	Manufacturing Director	3	Divorced	4810	26314	2	Y	No	14	3	3	80	1	19	5	2	10	7	0	0
38	No	Travel_Frequently	1490	Research & Development	2	2	Life Sciences	1	556	4	Male	42	3	1	Laboratory Technician	4	Married	1702	12106	1	Y	Yes	23	4	3	80	1	1	3	3	1	0	0	0
30	No	Non-Travel	1400	Research & Development	3	3	Life Sciences	1	562	3	Male	53	3	1	Laboratory Technician	4	Married	2097	16734	4	Y	No	15	3	3	80	1	9	3	1	5	3	1	2
29	No	Travel_Rarely	986	Research & Development	3	4	Medical	1	564	2	Male	93	2	3	Research Director	3	Married	11935	21526	1	Y	No	18	3	3	80	0	10	2	3	10	2	0	2
19	Yes	Travel_Rarely	489	Human Resources	2	2	Technical Degree	1	566	1	Male	52	2	1	Human Resources	4	Single	2564	18437	1	Y	No	12	3	3	80	0	1	3	4	1	0	0	3
30	No	Non-Travel	1398	Sales	22	4	Other	1	567	3	Female	69	3	3	Sales Executive	1	Married	8412	2890	0	Y	No	11	3	3	80	0	10	3	3	9	8	7	2
57	No	Travel_Rarely	210	Sales	29	3	Marketing	1	568	1	Male	56	2	4	Manager	4	Divorced	14118	22102	3	Y	No	12	3	3	80	1	32	3	2	1	0	0	11
30	No	Non-Travel	1116	Research & Development	2	3	Medical	1	571	3	Female	49	3	1	Laboratory Technician	4	Single	2564	7181	0	Y	No	14	3	3	80	0	12	2	2	11	7	6	2
47	No	Travel_Rarely	983	Research & Development	2	2	Medical	1	574	1	Female	65	3	2	Manufacturing Director	4	Divorced	5070	7389	5	Y	No	13	3	3	80	3	20	2	3	5	0	0	8
46	No	Travel_Rarely	1009	Research & Development	2	3	Life Sciences	1	575	1	Male	51	3	4	Research Director	3	Married	17861	2288	6	Y	No	13	3	3	80	0	26	2	1	3	2	0	7
35	No	Travel_Rarely	144	Research & Development	22	3	Life Sciences	1	577	4	Male	46	1	1	Laboratory Technician	3	Single	4230	19225	0	Y	No	15	3	3	80	0	6	2	3	5	4	4	1
54	No	Travel_Rarely	548	Research & Development	8	4	Life Sciences	1	578	3	Female	42	3	2	Laboratory Technician	3	Single	3780	23428	7	Y	No	11	3	3	80	0	19	3	3	1	0	0	5
34	No	Travel_Rarely	1303	Research & Development	2	4	Life Sciences	1	579	4	Male	62	2	1	Research Scientist	3	Divorced	2768	8416	3	Y	No	12	3	3	80	1	14	3	3	7	3	5	2
46	No	Travel_Rarely	1125	Sales	10	3	Marketing	1	580	3	Female	94	2	3	Sales Executive	4	Married	9071	11563	2	Y	Yes	19	3	3	80	1	15	3	3	3	2	1	7
35	No	Travel_Rarely	1276	Research & Development	16	3	Life Sciences	1	586	4	Male	72	3	3	Healthcare Representative	3	Married	7632	14295	4	Y	Yes	12	3	3	80	0	10	2	3	8	7	0	2
34	Yes	Travel_Frequently	988	Human Resources	23	3	Human Resources	1	590	2	Female	43	3	3	Human Resources	1	Divorced	9950	11533	9	Y	Yes	15	3	3	80	3	11	2	3	3	2	0	2
22	Yes	Travel_Frequently	1368	Research & Development	4	1	Technical Degree	1	593	3	Male	99	2	1	Laboratory Technician	3	Single	3894	9129	5	Y	No	16	3	3	80	0	4	3	3	2	2	1	3
35	No	Travel_Rarely	619	Sales	1	3	Marketing	1	600	2	Male	85	3	2	Sales Executive	3	Married	4717	18659	9	Y	No	11	3	3	80	0	15	2	3	11	9	6	0
40	No	Travel_Rarely	302	Research & Development	6	3	Life Sciences	1	601	2	Female	75	3	4	Manufacturing Director	3	Single	13237	20364	7	Y	No	15	3	3	80	0	22	3	3	20	6	5	8
31	No	Travel_Rarely	828	Sales	2	1	Life Sciences	1	604	2	Male	77	3	2	Sales Executive	4	Single	6582	8346	4	Y	Yes	13	3	3	80	0	10	2	4	6	5	0	1
33	No	Travel_Rarely	922	Research & Development	1	5	Medical	1	612	1	Female	95	4	4	Research Director	3	Divorced	16184	22578	4	Y	No	19	3	3	80	1	10	2	3	6	1	0	7
31	No	Travel_Rarely	688	Sales	7	3	Life Sciences	1	613	3	Male	44	2	3	Manager	4	Divorced	11557	25291	9	Y	No	21	4	3	80	1	10	3	2	5	4	0	0
40	No	Non-Travel	1094	Sales	28	3	Other	1	615	3	Male	58	1	3	Sales Executive	1	Divorced	10932	11373	3	Y	No	15	3	3	80	1	20	2	3	1	0	0	2
24	No	Travel_Frequently	535	Sales	24	3	Medical	1	632	4	Male	38	3	1	Sales Representative	4	Married	2400	5530	0	Y	No	13	3	3	80	2	3	3	3	2	2	2	3
38	No	Travel_Rarely	1495	Research & Development	10	3	Medical	1	634	3	Female	76	3	2	Healthcare Representative	3	Married	9824	22174	3	Y	No	19	3	3	80	1	18	4	3	1	0	0	1
49	No	Travel_Rarely	1245	Research & Development	18	4	Life Sciences	1	638	4	Male	58	2	5	Research Director	3	Divorced	19502	2125	1	Y	Yes	17	3	3	80	1	31	5	3	31	9	0	2
50	No	Travel_Frequently	1246	Human Resources	3	3	Medical	1	644	1	Male	99	3	5	Manager	2	Married	18200	7999	1	Y	No	11	3	3	80	1	32	2	3	32	5	10	8
25	No	Travel_Rarely	622	Sales	13	1	Medical	1	645	2	Male	40	3	1	Sales Representative	3	Married	2096	26376	1	Y	No	11	3	3	80	0	7	1	3	7	4	0	1
30	Yes	Travel_Frequently	448	Sales	12	4	Life Sciences	1	648	2	Male	74	2	1	Sales Representative	1	Married	2033	14470	1	Y	No	18	3	3	80	1	1	2	4	1	0	0	8
31	Yes	Travel_Rarely	1365	Sales	13	4	Medical	1	650	2	Male	46	3	2	Sales Executive	1	Divorced	4233	11512	2	Y	No	17	3	3	80	0	9	2	1	3	1	1	2
27	No	Travel_Rarely	798	Research & Development	6	4	Medical	1	655	1	Female	66	2	1	Research Scientist	3	Divorced	2187	5013	0	Y	No	12	3	3	80	2	6	5	2	5	3	0	2
37	No	Travel_Rarely	558	Sales	2	3	Marketing	1	656	4	Male	75	3	2	Sales Executive	3	Married	9602	3010	4	Y	Yes	11	3	3	80	1	17	3	2	3	0	1	0
43	No	Travel_Rarely	782	Research & Development	6	4	Other	1	661	2	Male	50	2	4	Research Director	4	Divorced	16627	2671	4	Y	Yes	14	3	3	80	1	21	3	2	1	0	0	0
21	No	Travel_Rarely	1343	Sales	22	1	Technical Degree	1	669	3	Male	49	3	1	Sales Representative	3	Single	3447	24444	1	Y	No	11	3	3	80	0	3	2	3	3	2	1	3
30	No	Travel_Frequently	160	Research & Development	3	3	Medical	1	680	3	Female	71	3	1	Research Scientist	3	Divorced	2083	22653	1	Y	No	20	4	3	80	1	1	2	3	1	0	0	0
26	No	Travel_Rarely	991	Research & Development	6	3	Life Sciences	1	686	3	Female	71	3	1	Laboratory Technician	4	Married	2659	17759	1	Y	Yes	13	3	3	80	1	3	2	3	3	2	0	7
37	No	Travel_Rarely	482	Research & Development	3	3	Other	1	689	3	Male	36	3	3	Manufacturing Director	3	Married	9434	9606	1	Y	No	15	3	3	80	1	10	2	3	10	7	7	10
33	No	Travel_Frequently	1296	Research & Development	6	3	Life Sciences	1	692	3	Male	30	3	2	Healthcare Representative	4	Divorced	7725	5335	3	Y	No	23	4	3	80	1	15	2	1	13	11	4	0
54	No	Travel_Rarely	397	Human Resources	19	4	Medical	1	698	3	Male	88	3	3	Human Resources	2	Married	10725	6729	2	Y	No	15	3	3	80	1	16	1	4	9	7	7	2
36	No	Travel_Rarely	913	Research & Development	9	2	Medical	1	699	2	Male	48	2	2	Manufacturing Director	2	Divorced	8847	13934	2	Y	Yes	11	3	3	80	1	13	2	3	3	2	0	9
35	No	Non-Travel	727	Research & Development	3	3	Life Sciences	1	704	3	Male	41	2	1	Laboratory Technician	3	Married	1281	16900	1	Y	No	18	3	3	80	2	1	3	3	1	0	0	11
25	No	Travel_Rarely	810	Sales	8	3	Life Sciences	1	707	4	Male	57	4	2	Sales Executive	2	Married	4851	15678	0	Y	No	22	4	3	80	1	4	4	3	3	2	1	13
50	No	Travel_Rarely	1207	Research & Development	28	1	Medical	1	716	4	Male	74	4	1	Laboratory Technician	3	Married	3221	3297	1	Y	Yes	11	3	3	80	3	20	3	3	20	8	3	14
38	No	Travel_Rarely	827	Research & Development	1	4	Life Sciences	1	724	2	Female	33	4	2	Healthcare Representative	4	Single	7625	19383	0	Y	No	13	3	3	80	0	10	4	2	9	7	1	8
40	No	Travel_Frequently	580	Sales	5	4	Life Sciences	1	729	4	Male	48	2	3	Sales Executive	1	Married	10475	23772	5	Y	Yes	21	4	3	80	1	20	2	3	18	13	1	2
53	No	Travel_Rarely	970	Research & Development	7	3	Life Sciences	1	730	3	Male	59	4	4	Research Director	3	Married	14814	13514	3	Y	No	19	3	3	80	0	32	3	3	5	1	1	1
27	No	Travel_Frequently	294	Research & Development	10	2	Life Sciences	1	733	4	Male	32	3	3	Manufacturing Director	1	Divorced	8793	4809	1	Y	No	21	4	3	80	2	9	4	2	9	7	1	7
44	No	Non-Travel	381	Research & Development	24	3	Medical	1	744	1	Male	49	1	1	Laboratory Technician	3	Single	3708	2104	2	Y	No	14	3	3	80	0	9	5	3	5	2	1	9
29	No	Travel_Rarely	1396	Sales	10	3	Life Sciences	1	749	3	Male	99	3	1	Sales Representative	3	Single	2642	2755	1	Y	No	11	3	3	80	0	1	6	3	1	0	0	4
43	No	Travel_Frequently	775	Sales	15	3	Life Sciences	1	754	4	Male	47	2	2	Sales Executive	4	Married	6804	23683	3	Y	No	18	3	3	80	1	7	5	3	2	2	2	4
39	No	Travel_Rarely	141	Human Resources	3	3	Human Resources	1	760	3	Female	44	4	2	Human Resources	2	Married	6389	18767	9	Y	No	15	3	3	80	1	12	3	1	8	3	3	12
56	No	Travel_Rarely	832	Research & Development	9	3	Medical	1	762	3	Male	81	3	4	Healthcare Representative	4	Married	11103	20420	7	Y	No	11	3	3	80	0	30	1	2	10	7	1	0
34	No	Travel_Rarely	167	Research & Development	8	5	Life Sciences	1	775	2	Female	32	3	2	Manufacturing Director	1	Divorced	5121	4187	3	Y	No	14	3	3	80	1	7	3	3	0	0	0	2
33	Yes	Travel_Rarely	527	Research & Development	1	4	Other	1	780	4	Male	63	3	1	Research Scientist	4	Single	2686	5207	1	Y	Yes	13	3	3	80	0	10	2	2	10	9	7	0
34	No	Travel_Rarely	304	Sales	2	3	Other	1	786	4	Male	60	3	2	Sales Executive	4	Single	6274	18686	1	Y	No	22	4	3	80	0	6	5	3	6	5	1	0
26	Yes	Travel_Rarely	1146	Sales	8	3	Technical Degree	1	796	4	Male	38	2	2	Sales Executive	1	Single	5326	3064	6	Y	No	17	3	3	80	0	6	2	2	4	3	1	2
34	No	Travel_Rarely	182	Research & Development	1	4	Life Sciences	1	797	2	Female	72	4	1	Research Scientist	4	Single	3280	13551	2	Y	No	16	3	3	80	0	10	2	3	4	2	1	7
34	No	Travel_Rarely	121	Research & Development	2	4	Medical	1	804	3	Female	86	2	1	Research Scientist	1	Single	4381	7530	1	Y	No	11	3	3	80	0	6	3	3	6	5	1	1
30	No	Travel_Rarely	921	Research & Development	1	3	Life Sciences	1	806	4	Male	38	1	1	Laboratory Technician	3	Married	3833	24375	3	Y	No	21	4	3	80	2	7	2	3	2	2	0	5
23	Yes	Travel_Rarely	1243	Research & Development	6	3	Life Sciences	1	811	3	Male	63	4	1	Laboratory Technician	1	Married	1601	3445	1	Y	Yes	21	4	3	80	2	1	2	3	0	0	0	3
24	No	Non-Travel	1092	Research & Development	9	3	Life Sciences	1	812	3	Male	60	2	1	Laboratory Technician	2	Divorced	2694	26551	1	Y	No	11	3	3	80	3	1	4	3	1	0	0	2
33	Yes	Travel_Rarely	118	Sales	16	3	Marketing	1	819	1	Female	69	3	2	Sales Executive	1	Single	5324	26507	5	Y	No	15	3	3	80	0	6	3	3	3	2	0	0
47	No	Travel_Rarely	202	Research & Development	2	2	Other	1	820	3	Female	33	3	4	Manager	4	Married	16752	12982	1	Y	Yes	11	3	3	80	1	26	3	2	26	14	3	3
29	No	Travel_Rarely	1252	Research & Development	23	2	Life Sciences	1	824	3	Male	81	4	1	Research Scientist	3	Married	2700	23779	1	Y	No	24	4	3	80	1	10	3	3	10	7	0	8
35	No	Travel_Rarely	1258	Research & Development	1	4	Life Sciences	1	826	4	Female	40	4	1	Research Scientist	3	Single	2506	13301	3	Y	No	13	3	3	80	0	7	0	3	2	2	2	2
32	No	Travel_Rarely	859	Research & Development	4	3	Life Sciences	1	830	3	Female	98	2	2	Manufacturing Director	3	Married	6162	19124	1	Y	No	12	3	3	80	1	14	3	3	14	13	6	0
38	No	Travel_Frequently	471	Research & Development	12	3	Life Sciences	1	837	1	Male	45	2	2	Healthcare Representative	1	Divorced	6288	4284	2	Y	No	15	3	3	80	1	13	3	2	4	3	1	2
34	No	Travel_Frequently	702	Research & Development	16	4	Life Sciences	1	838	3	Female	100	2	1	Research Scientist	4	Single	2553	8306	1	Y	No	16	3	3	80	0	6	3	3	5	2	1	0
55	Yes	Travel_Rarely	436	Sales	2	1	Medical	1	842	3	Male	37	3	2	Sales Executive	4	Single	5160	21519	4	Y	No	16	3	3	80	0	12	3	2	9	7	7	7
43	No	Travel_Rarely	589	Research & Development	14	2	Life Sciences	1	843	2	Male	94	3	4	Research Director	1	Married	17159	5200	6	Y	No	24	4	3	80	1	22	3	3	4	1	1	7
34	No	Travel_Rarely	829	Human Resources	3	2	Human Resources	1	847	3	Male	88	3	1	Human Resources	4	Married	3737	2243	0	Y	No	19	3	3	80	1	4	1	1	3	2	0	9
27	No	Non-Travel	443	Research & Development	3	3	Medical	1	850	4	Male	50	3	1	Research Scientist	4	Married	1706	16571	1	Y	No	11	3	3	80	3	0	6	2	0	0	0	3
51	No	Travel_Rarely	1318	Sales	26	4	Marketing	1	851	1	Female	66	3	4	Manager	3	Married	16307	5594	2	Y	No	14	3	3	80	1	29	2	2	20	6	4	2
25	No	Travel_Rarely	180	Research & Development	2	1	Medical	1	854	1	Male	65	4	1	Research Scientist	1	Single	3424	21632	7	Y	No	13	3	3	80	0	6	3	2	4	3	0	8
32	No	Travel_Rarely	117	Sales	13	4	Life Sciences	1	859	2	Male	73	3	2	Sales Executive	4	Divorced	4403	9250	2	Y	No	11	3	3	80	1	8	3	2	5	2	0	9
45	No	Travel_Rarely	930	Sales	9	3	Marketing	1	864	4	Male	74	3	3	Sales Executive	1	Divorced	10761	19239	4	Y	Yes	12	3	3	80	1	18	2	3	5	4	0	1
32	No	Travel_Rarely	638	Research & Development	8	2	Medical	1	865	3	Female	91	4	2	Research Scientist	3	Married	5175	22162	5	Y	No	12	3	3	80	1	9	3	2	5	3	1	2
52	No	Travel_Frequently	890	Research & Development	25	4	Medical	1	867	3	Female	81	2	4	Manufacturing Director	4	Married	13826	19028	3	Y	No	22	4	3	80	0	31	3	3	9	8	0	2
44	No	Travel_Rarely	986	Research & Development	8	4	Life Sciences	1	874	1	Male	62	4	1	Laboratory Technician	4	Married	2818	5044	2	Y	Yes	24	4	3	80	1	10	2	2	3	2	0	7
36	No	Travel_Rarely	1278	Human Resources	8	3	Life Sciences	1	878	1	Male	77	2	1	Human Resources	1	Married	2342	8635	0	Y	No	21	4	3	80	0	6	3	3	5	4	0	6
29	Yes	Travel_Rarely	341	Sales	1	3	Medical	1	896	2	Female	48	2	1	Sales Representative	3	Divorced	2800	23522	6	Y	Yes	19	3	3	80	3	5	3	3	3	2	0	2
53	No	Travel_Rarely	868	Sales	8	3	Marketing	1	897	1	Male	73	3	4	Sales Executive	4	Married	11836	22789	5	Y	No	14	3	3	80	1	28	3	3	2	0	2	7
53	No	Travel_Rarely	102	Research & Development	23	4	Life Sciences	1	901	4	Female	72	3	4	Research Director	4	Single	14275	20206	6	Y	No	18	3	3	80	0	33	0	3	12	9	3	8
39	No	Travel_Rarely	1383	Human Resources	2	3	Life Sciences	1	909	4	Female	42	2	2	Human Resources	4	Married	5204	7790	8	Y	No	11	3	3	80	2	13	2	3	5	4	0	2
33	No	Travel_Rarely	1075	Human Resources	3	2	Human Resources	1	910	4	Male	57	3	1	Human Resources	2	Divorced	2277	22650	3	Y	Yes	11	3	3	80	1	7	4	4	4	3	0	4
32	Yes	Travel_Rarely	374	Research & Development	25	4	Life Sciences	1	911	1	Male	87	3	1	Laboratory Technician	4	Single	2795	18016	1	Y	Yes	24	4	3	80	0	1	2	1	1	0	0	0
29	No	Travel_Rarely	1086	Research & Development	7	1	Medical	1	912	1	Female	62	2	1	Laboratory Technician	4	Divorced	2532	6054	6	Y	No	14	3	3	80	3	8	5	3	4	3	0	6
43	No	Travel_Rarely	177	Research & Development	8	3	Life Sciences	1	920	1	Female	55	3	2	Manufacturing Director	2	Divorced	4765	23814	4	Y	No	21	4	3	80	1	4	2	4	1	0	0	0
41	Yes	Travel_Rarely	1085	Research & Development	2	4	Life Sciences	1	927	2	Female	57	1	1	Laboratory Technician	4	Divorced	2778	17725	4	Y	Yes	13	3	3	80	1	10	1	2	7	7	1	2
27	No	Travel_Rarely	618	Research & Development	4	3	Life Sciences	1	933	2	Female	76	3	1	Research Scientist	3	Single	2318	17808	1	Y	No	19	3	3	80	0	1	2	3	1	1	0	7
49	No	Travel_Rarely	527	Research & Development	8	2	Other	1	944	1	Female	51	3	3	Laboratory Technician	2	Married	7403	22477	4	Y	No	11	3	3	80	1	29	3	2	26	9	1	0
36	No	Travel_Rarely	188	Research & Development	7	4	Other	1	949	2	Male	65	3	1	Research Scientist	4	Single	4678	23293	2	Y	No	18	3	3	80	0	8	6	3	6	2	0	0
32	No	Non-Travel	1184	Research & Development	1	3	Life Sciences	1	951	3	Female	70	2	1	Laboratory Technician	2	Married	2332	3974	6	Y	No	20	4	3	80	0	5	3	3	3	0	0	2
25	Yes	Travel_Rarely	867	Sales	19	2	Marketing	1	952	3	Male	36	2	1	Sales Representative	2	Married	2413	18798	1	Y	Yes	18	3	3	80	3	1	2	3	1	0	0	0
41	No	Travel_Rarely	263	Research & Development	6	3	Medical	1	957	4	Male	59	3	1	Laboratory Technician	1	Single	4721	3119	2	Y	Yes	13	3	3	80	0	20	3	3	18	13	2	1
36	No	Travel_Rarely	938	Research & Development	2	4	Medical	1	958	3	Male	79	3	1	Laboratory Technician	3	Single	2519	12287	4	Y	No	21	4	3	80	0	16	6	3	11	8	3	12
31	No	Travel_Rarely	616	Research & Development	12	3	Medical	1	961	4	Female	41	3	2	Healthcare Representative	4	Married	5855	17369	0	Y	Yes	11	3	3	80	2	10	2	1	9	7	8	0
32	No	Travel_Rarely	498	Research & Development	3	4	Medical	1	966	3	Female	93	3	2	Manufacturing Director	1	Married	6725	13554	1	Y	No	12	3	3	80	1	8	2	4	8	7	6	7
37	Yes	Travel_Rarely	625	Sales	1	4	Life Sciences	1	970	1	Male	46	2	3	Sales Executive	3	Married	10609	14922	5	Y	No	11	3	3	80	0	17	2	1	14	1	11	7
53	No	Travel_Rarely	1376	Sales	2	2	Medical	1	981	3	Male	45	3	4	Manager	3	Divorced	14852	13938	6	Y	No	13	3	3	80	1	22	3	4	17	13	15	7
47	No	Travel_Frequently	1379	Research & Development	16	4	Medical	1	987	3	Male	64	4	2	Manufacturing Director	3	Divorced	5067	6759	1	Y	Yes	19	3	3	80	0	20	3	4	19	10	2	9
29	Yes	Travel_Rarely	906	Research & Development	10	3	Life Sciences	1	994	4	Female	92	2	1	Research Scientist	1	Single	2404	11479	6	Y	Yes	20	4	3	80	0	3	5	3	0	0	0	0
50	No	Travel_Rarely	1126	Research & Development	1	2	Medical	1	997	4	Male	66	3	4	Research Director	4	Divorced	17399	6615	9	Y	No	22	4	3	80	1	32	1	2	5	4	1	1
45	No	Non-Travel	248	Research & Development	23	2	Life Sciences	1	1002	4	Male	42	3	2	Laboratory Technician	1	Married	3633	14039	1	Y	Yes	15	3	3	80	1	9	2	3	9	8	0	5
47	No	Travel_Rarely	955	Sales	4	2	Life Sciences	1	1003	4	Female	83	3	2	Sales Executive	4	Single	4163	8571	1	Y	Yes	17	3	3	80	0	9	0	3	9	0	0	9
31	No	Travel_Frequently	853	Research & Development	1	1	Life Sciences	1	1011	3	Female	96	3	2	Manufacturing Director	1	Married	4148	11275	1	Y	No	12	3	3	80	1	4	1	3	4	3	0	2
54	No	Travel_Rarely	1441	Research & Development	17	3	Technical Degree	1	1013	3	Female	56	3	3	Manufacturing Director	3	Married	10739	13943	8	Y	No	11	3	3	80	1	22	2	3	10	7	0	3
35	No	Travel_Rarely	583	Research & Development	25	4	Medical	1	1014	3	Female	57	3	3	Healthcare Representative	3	Divorced	10388	6975	1	Y	Yes	11	3	3	80	1	16	3	2	16	10	10	9
30	No	Travel_Rarely	153	Research & Development	8	2	Life Sciences	1	1015	2	Female	73	4	3	Research Director	1	Married	11416	17802	0	Y	Yes	12	3	3	80	3	9	4	2	8	7	1	2
39	No	Travel_Rarely	466	Research & Development	1	1	Life Sciences	1	1026	4	Female	65	2	4	Manufacturing Director	4	Married	12742	7060	1	Y	No	16	3	3	80	1	21	3	3	21	6	11	4
38	No	Travel_Rarely	1035	Sales	3	4	Life Sciences	1	1036	2	Male	42	3	2	Sales Executive	4	Single	6861	4981	8	Y	Yes	12	3	3	80	0	19	1	3	1	0	0	2
44	No	Travel_Rarely	1448	Sales	28	3	Medical	1	1039	4	Female	53	4	4	Sales Executive	4	Married	13320	11737	3	Y	Yes	18	3	3	80	1	23	2	3	12	11	11	3
36	Yes	Travel_Rarely	885	Research & Development	16	4	Life Sciences	1	1042	3	Female	43	4	1	Laboratory Technician	1	Single	2743	8269	1	Y	No	16	3	3	80	0	18	1	3	17	13	15	2
39	No	Travel_Frequently	945	Research & Development	22	3	Medical	1	1043	4	Female	82	3	3	Manufacturing Director	1	Single	10880	5083	1	Y	Yes	13	3	3	80	0	21	2	3	21	6	2	1
59	No	Travel_Rarely	1089	Sales	1	2	Technical Degree	1	1048	2	Male	66	3	3	Manager	4	Married	11904	11038	3	Y	Yes	14	3	3	80	1	14	1	1	6	4	0	0
26	No	Travel_Frequently	921	Research & Development	1	1	Medical	1	1068	1	Female	66	2	1	Research Scientist	3	Divorced	2007	25265	1	Y	No	13	3	3	80	2	5	5	3	5	3	1	2
43	No	Travel_Rarely	415	Sales	25	3	Medical	1	1076	3	Male	79	2	3	Sales Executive	4	Divorced	10798	5268	5	Y	No	13	3	3	80	1	18	5	3	1	0	0	0
51	Yes	Travel_Rarely	1323	Research & Development	4	4	Life Sciences	1	1081	1	Male	34	3	1	Research Scientist	3	Married	2461	10332	9	Y	Yes	12	3	3	80	3	18	2	4	10	0	2	2
30	No	Travel_Rarely	1176	Research & Development	20	3	Other	1	1084	3	Male	85	3	2	Manufacturing Director	1	Married	9957	9096	0	Y	No	15	3	3	80	1	7	1	2	6	2	0	0
41	No	Travel_Rarely	509	Research & Development	7	2	Technical Degree	1	1085	2	Female	43	4	1	Research Scientist	3	Married	3376	18863	1	Y	No	13	3	3	80	0	10	3	3	10	6	0	3
33	No	Travel_Rarely	654	Research & Development	5	3	Life Sciences	1	1099	4	Male	34	2	3	Healthcare Representative	4	Divorced	7119	21214	4	Y	No	15	3	3	80	1	9	2	3	3	2	1	0
34	No	Travel_Frequently	618	Research & Development	3	1	Life Sciences	1	1103	1	Male	45	3	2	Healthcare Representative	4	Single	7756	22266	0	Y	No	17	3	3	80	0	7	1	2	6	2	0	2
37	No	Travel_Rarely	309	Sales	10	4	Life Sciences	1	1105	4	Female	88	2	2	Sales Executive	4	Divorced	6694	24223	2	Y	Yes	14	3	3	80	3	8	5	3	1	0	0	3
26	Yes	Travel_Rarely	1330	Research & Development	21	3	Medical	1	1107	1	Male	37	3	1	Laboratory Technician	3	Divorced	2377	19373	1	Y	No	20	4	3	80	1	1	0	2	1	1	0	2
33	No	Travel_Frequently	970	Sales	7	3	Life Sciences	1	1114	4	Female	30	3	2	Sales Executive	2	Married	4302	13401	0	Y	No	17	3	3	80	1	4	3	3	3	2	0	3
48	No	Non-Travel	1262	Research & Development	1	4	Medical	1	1116	1	Male	35	4	4	Manager	4	Single	16885	16154	2	Y	No	22	4	3	80	0	27	3	2	5	4	2	4
38	No	Travel_Rarely	130	Sales	2	2	Marketing	1	1125	4	Male	32	3	3	Sales Executive	2	Single	7351	20619	7	Y	No	16	3	3	80	0	10	2	3	1	0	0	10
43	No	Travel_Frequently	1082	Research & Development	27	3	Life Sciences	1	1126	3	Female	83	3	3	Manufacturing Director	1	Married	10820	11535	8	Y	No	11	3	3	80	1	18	1	3	8	7	0	13
21	No	Travel_Rarely	984	Research & Development	1	1	Technical Degree	1	1131	4	Female	70	2	1	Research Scientist	2	Single	2070	25326	1	Y	Yes	11	3	3	80	0	2	6	4	2	2	2	14
39	No	Non-Travel	439	Research & Development	9	3	Life Sciences	1	1132	3	Male	70	3	2	Laboratory Technician	2	Single	6782	8770	9	Y	No	15	3	3	80	0	9	2	2	5	4	0	5
29	No	Travel_Rarely	718	Research & Development	8	1	Medical	1	1150	2	Male	79	2	2	Manufacturing Director	4	Married	5056	17689	1	Y	Yes	15	3	3	80	1	10	2	2	10	7	1	7
31	Yes	Travel_Frequently	874	Research & Development	15	3	Medical	1	1160	3	Male	72	3	1	Laboratory Technician	3	Married	2610	6233	1	Y	No	12	3	3	80	1	2	5	2	2	2	2	2
37	No	Travel_Rarely	367	Research & Development	25	2	Medical	1	1161	3	Female	52	2	2	Healthcare Representative	4	Divorced	5731	17171	7	Y	No	13	3	3	80	2	9	2	3	6	2	1	0
27	No	Travel_Rarely	199	Research & Development	6	3	Life Sciences	1	1162	4	Male	55	2	1	Research Scientist	3	Married	2539	7950	1	Y	No	13	3	3	80	1	4	0	3	4	2	2	7
40	No	Travel_Frequently	593	Research & Development	9	4	Medical	1	1166	2	Female	88	3	3	Research Director	3	Single	13499	13782	9	Y	No	17	3	3	80	0	20	3	2	18	7	2	4
34	No	Travel_Frequently	669	Research & Development	1	3	Medical	1	1184	4	Male	97	2	2	Healthcare Representative	1	Single	5343	25755	0	Y	No	20	4	3	80	0	14	3	3	13	9	4	0
32	No	Non-Travel	862	Sales	2	1	Life Sciences	1	1190	3	Female	76	3	1	Sales Representative	1	Divorced	2827	14947	1	Y	No	12	3	3	80	3	1	3	3	1	0	0	4
19	No	Travel_Rarely	645	Research & Development	9	2	Life Sciences	1	1193	3	Male	54	3	1	Research Scientist	1	Single	2552	7172	1	Y	No	25	4	3	80	0	1	4	3	1	1	0	9
45	No	Travel_Rarely	1457	Research & Development	7	3	Medical	1	1195	1	Female	83	3	1	Research Scientist	3	Married	4477	20100	4	Y	Yes	19	3	3	80	1	7	2	2	3	2	0	2
44	Yes	Travel_Rarely	1097	Research & Development	10	4	Life Sciences	1	1200	3	Male	96	3	1	Research Scientist	3	Single	2936	10826	1	Y	Yes	11	3	3	80	0	6	4	3	6	4	0	3
30	No	Travel_Rarely	1329	Sales	29	4	Life Sciences	1	1211	3	Male	61	3	2	Sales Executive	1	Divorced	4115	13192	8	Y	No	19	3	3	80	3	8	3	3	4	3	0	0
50	No	Travel_Frequently	1421	Research & Development	2	3	Medical	1	1215	4	Female	30	3	4	Manager	1	Married	17856	9490	2	Y	No	22	4	3	80	1	32	3	3	2	2	2	2
28	No	Travel_Rarely	1179	Research & Development	19	4	Medical	1	1216	4	Male	78	2	1	Laboratory Technician	1	Married	3196	12449	1	Y	No	12	3	3	80	3	6	2	3	6	5	3	8
36	No	Travel_Rarely	917	Research & Development	6	4	Life Sciences	1	1221	3	Male	60	1	1	Laboratory Technician	3	Divorced	2741	6865	1	Y	No	14	3	3	80	1	7	4	3	7	7	1	0
46	No	Travel_Rarely	150	Research & Development	2	4	Technical Degree	1	1228	4	Male	60	3	2	Manufacturing Director	4	Divorced	7379	17433	2	Y	No	11	3	3	80	1	12	3	2	6	3	1	2
32	No	Travel_Frequently	116	Research & Development	13	3	Other	1	1234	3	Female	77	2	1	Laboratory Technician	2	Married	2743	7331	1	Y	No	20	4	3	80	1	2	2	3	2	2	2	11
36	No	Travel_Rarely	363	Research & Development	1	3	Technical Degree	1	1237	3	Female	77	1	3	Manufacturing Director	1	Divorced	10252	4235	2	Y	Yes	21	4	3	80	1	17	2	3	7	7	7	2
42	No	Travel_Frequently	458	Research & Development	26	5	Medical	1	1242	1	Female	60	3	3	Research Director	1	Married	13191	23281	3	Y	Yes	17	3	3	80	0	20	6	3	1	0	0	2
49	No	Travel_Rarely	1098	Research & Development	4	2	Medical	1	1256	1	Male	85	2	5	Manager	3	Married	18711	12124	2	Y	No	13	3	3	80	1	23	2	4	1	0	0	7
36	No	Travel_Frequently	469	Research & Development	3	3	Technical Degree	1	1257	3	Male	46	3	1	Research Scientist	2	Married	3692	9256	1	Y	No	12	3	3	80	0	12	2	2	11	10	0	3
48	No	Travel_Rarely	969	Research & Development	2	2	Technical Degree	1	1258	4	Male	76	4	1	Laboratory Technician	2	Single	2559	16620	5	Y	No	11	3	3	80	0	7	4	2	1	0	0	0
48	No	Travel_Rarely	715	Research & Development	1	3	Life Sciences	1	1263	4	Male	76	2	5	Research Director	4	Single	18265	8733	6	Y	No	12	3	3	80	0	25	3	4	1	0	0	9
44	No	Travel_Rarely	1099	Sales	5	3	Marketing	1	1267	2	Male	88	3	5	Manager	2	Married	18213	8751	7	Y	No	11	3	3	80	1	26	5	3	22	9	3	0
21	Yes	Travel_Frequently	251	Research & Development	10	2	Life Sciences	1	1279	1	Female	45	2	1	Laboratory Technician	3	Single	2625	25308	1	Y	No	20	4	3	80	0	2	2	1	2	2	2	4
46	No	Travel_Rarely	168	Sales	4	2	Marketing	1	1280	4	Female	33	2	5	Manager	2	Married	18789	9946	2	Y	No	14	3	3	80	1	26	2	3	11	4	0	0
34	No	Travel_Frequently	135	Research & Development	19	3	Medical	1	1285	3	Female	46	3	2	Laboratory Technician	2	Divorced	4444	22534	4	Y	No	13	3	3	80	2	15	2	4	11	8	5	3
28	No	Travel_Frequently	791	Research & Development	1	4	Medical	1	1286	4	Male	44	3	1	Laboratory Technician	3	Single	2154	6842	0	Y	Yes	11	3	3	80	0	5	2	2	4	2	0	0
30	No	Non-Travel	879	Research & Development	9	2	Medical	1	1298	3	Female	72	3	2	Manufacturing Director	3	Single	4695	12858	7	Y	Yes	18	3	3	80	0	10	3	3	8	4	1	2
32	No	Travel_Rarely	604	Sales	8	3	Medical	1	1304	3	Male	56	4	2	Sales Executive	4	Married	6209	11693	1	Y	No	15	3	3	80	2	10	4	4	10	7	0	3
45	No	Travel_Frequently	364	Research & Development	25	3	Medical	1	1306	2	Female	83	3	5	Manager	2	Single	18061	13035	3	Y	No	22	4	3	80	0	22	4	3	0	0	0	3
46	No	Travel_Rarely	991	Human Resources	1	2	Life Sciences	1	1314	4	Female	44	3	1	Human Resources	1	Single	3423	22957	6	Y	No	12	3	3	80	0	10	3	4	7	6	5	7
40	Yes	Travel_Rarely	299	Sales	25	4	Marketing	1	1318	4	Male	57	2	3	Sales Executive	2	Single	9094	17235	2	Y	Yes	12	3	3	80	0	9	2	3	5	4	1	0
52	Yes	Travel_Rarely	1030	Sales	5	3	Life Sciences	1	1319	2	Male	64	3	3	Sales Executive	2	Single	8446	21534	9	Y	Yes	19	3	3	80	0	10	2	2	8	7	7	1
44	Yes	Travel_Rarely	935	Research & Development	3	3	Life Sciences	1	1333	1	Male	89	3	1	Laboratory Technician	1	Married	2362	14669	4	Y	No	12	3	3	80	0	10	4	4	3	2	1	7
40	No	Travel_Rarely	523	Research & Development	2	3	Life Sciences	1	1346	3	Male	98	3	2	Research Scientist	4	Single	4661	22455	1	Y	No	13	3	3	80	0	9	4	3	9	8	8	9
25	No	Travel_Rarely	882	Research & Development	19	1	Medical	1	1358	4	Male	67	3	1	Laboratory Technician	4	Married	3669	9075	3	Y	No	11	3	3	80	3	7	6	2	3	2	1	17
40	No	Travel_Rarely	329	Research & Development	1	4	Life Sciences	1	1361	2	Male	88	3	1	Laboratory Technician	2	Married	2387	6762	3	Y	No	22	4	3	80	1	7	3	3	4	2	0	2
48	No	Travel_Rarely	855	Research & Development	4	3	Life Sciences	1	1363	4	Male	54	3	3	Manufacturing Director	4	Single	7898	18706	1	Y	No	11	3	3	80	0	11	2	3	10	9	0	4
18	No	Non-Travel	1124	Research & Development	1	3	Life Sciences	1	1368	4	Female	97	3	1	Laboratory Technician	4	Single	1611	19305	1	Y	No	15	3	3	80	0	0	5	4	0	0	0	3
55	Yes	Travel_Rarely	267	Sales	13	4	Marketing	1	1372	1	Male	85	4	4	Sales Executive	3	Single	13695	9277	6	Y	Yes	17	3	3	80	0	24	2	2	19	7	3	9
34	No	Non-Travel	999	Research & Development	26	1	Technical Degree	1	1374	1	Female	92	2	1	Research Scientist	3	Divorced	2029	15891	1	Y	No	20	4	3	80	3	5	2	3	5	4	0	2
31	Yes	Travel_Frequently	703	Sales	2	3	Life Sciences	1	1379	3	Female	90	2	1	Sales Representative	4	Single	2785	11882	7	Y	No	14	3	3	80	0	3	3	4	1	0	0	7
35	Yes	Travel_Frequently	662	Sales	18	4	Marketing	1	1380	4	Female	67	3	2	Sales Executive	3	Married	4614	23288	0	Y	Yes	18	3	3	80	1	5	0	2	4	2	3	7
28	No	Travel_Rarely	736	Sales	26	3	Life Sciences	1	1387	3	Male	48	2	2	Sales Executive	1	Married	4724	24232	1	Y	No	11	3	3	80	1	5	0	3	5	3	0	10
42	No	Travel_Rarely	1147	Human Resources	10	3	Human Resources	1	1408	3	Female	31	3	4	Manager	1	Married	16799	16616	0	Y	No	14	3	3	80	1	21	5	3	20	7	0	3
52	No	Travel_Rarely	258	Research & Development	8	4	Other	1	1409	3	Female	54	3	1	Laboratory Technician	1	Married	2950	17363	9	Y	No	13	3	3	80	0	12	2	1	5	4	0	1
35	No	Travel_Frequently	200	Research & Development	18	2	Life Sciences	1	1412	3	Male	60	3	3	Manufacturing Director	4	Single	9362	19944	2	Y	No	11	3	3	80	0	10	2	3	2	2	2	7
58	No	Travel_Rarely	1055	Research & Development	1	3	Medical	1	1423	4	Female	76	3	5	Research Director	1	Married	19701	22456	3	Y	Yes	21	4	3	80	1	32	3	3	9	8	1	0
31	No	Travel_Rarely	182	Research & Development	8	5	Life Sciences	1	1430	1	Female	93	3	4	Research Director	2	Single	16422	8847	3	Y	No	11	3	3	80	0	9	3	4	3	2	1	12
34	No	Travel_Frequently	560	Research & Development	1	4	Other	1	1431	4	Male	91	3	1	Research Scientist	1	Divorced	2996	20284	5	Y	No	14	3	3	80	2	10	2	3	4	3	1	8
31	Yes	Travel_Rarely	202	Research & Development	8	3	Life Sciences	1	1433	1	Female	34	2	1	Research Scientist	2	Single	1261	22262	1	Y	No	12	3	3	80	0	1	3	4	1	0	0	4
36	No	Travel_Rarely	172	Research & Development	4	4	Life Sciences	1	1435	1	Male	37	2	2	Laboratory Technician	4	Single	5810	22604	1	Y	No	16	3	3	80	0	10	2	2	10	4	1	7
47	No	Travel_Rarely	465	Research & Development	1	3	Technical Degree	1	1438	1	Male	74	3	1	Research Scientist	4	Married	3420	10205	7	Y	No	12	3	3	80	1	17	2	2	6	5	1	0
24	No	Travel_Rarely	1476	Sales	4	1	Medical	1	1445	4	Female	42	3	2	Sales Executive	3	Married	4162	15211	1	Y	Yes	12	3	3	80	2	5	3	3	5	4	0	2
32	No	Travel_Rarely	601	Sales	7	5	Marketing	1	1446	4	Male	97	3	2	Sales Executive	4	Married	9204	23343	4	Y	No	12	3	3	80	1	7	3	2	4	3	0	9
40	No	Non-Travel	663	Research & Development	9	4	Other	1	1449	3	Male	81	3	2	Laboratory Technician	3	Divorced	3975	23099	3	Y	No	11	3	3	80	2	11	2	4	8	7	0	1
31	Yes	Travel_Frequently	523	Research & Development	2	3	Life Sciences	1	1464	2	Male	94	3	1	Laboratory Technician	4	Married	3722	21081	6	Y	Yes	13	3	3	80	1	7	2	1	2	2	2	8
40	No	Non-Travel	218	Research & Development	8	1	Medical	1	1468	4	Male	55	2	3	Research Director	2	Divorced	13757	25178	2	Y	No	11	3	3	80	1	16	5	3	9	8	4	5
40	No	Travel_Rarely	896	Research & Development	2	3	Medical	1	1474	3	Male	68	3	1	Research Scientist	3	Divorced	2345	8045	2	Y	No	14	3	3	80	1	8	3	4	3	1	1	7
44	No	Travel_Rarely	1467	Research & Development	20	3	Life Sciences	1	1475	4	Male	49	3	1	Research Scientist	2	Single	3420	21158	1	Y	No	13	3	3	80	0	6	3	2	5	2	1	0
30	No	Travel_Rarely	1358	Sales	16	1	Life Sciences	1	1479	4	Male	96	3	2	Sales Executive	3	Married	5301	2939	8	Y	No	15	3	3	80	2	4	2	2	2	1	2	7
42	No	Travel_Frequently	748	Research & Development	9	2	Medical	1	1480	1	Female	74	3	1	Laboratory Technician	4	Single	3673	16458	1	Y	No	13	3	3	80	0	12	3	3	12	9	5	0
44	No	Travel_Frequently	383	Sales	1	5	Marketing	1	1481	1	Female	79	3	2	Sales Executive	3	Married	4768	9282	7	Y	No	12	3	3	80	1	11	4	2	1	0	0	3
34	Yes	Travel_Rarely	790	Sales	24	4	Medical	1	1489	1	Female	40	2	2	Sales Executive	2	Single	4599	7815	0	Y	Yes	23	4	3	80	0	16	2	4	15	9	10	0
24	Yes	Travel_Frequently	381	Research & Development	9	3	Medical	1	1494	2	Male	89	3	1	Laboratory Technician	1	Single	3172	16998	2	Y	Yes	11	3	3	80	0	4	2	2	0	0	0	0
24	No	Non-Travel	830	Sales	13	2	Life Sciences	1	1495	4	Female	78	3	1	Sales Representative	2	Married	2033	7103	1	Y	No	13	3	3	80	1	1	2	3	1	0	0	7
29	No	Travel_Rarely	1246	Sales	19	3	Life Sciences	1	1497	3	Male	77	2	2	Sales Executive	3	Divorced	8620	23757	1	Y	No	14	3	3	80	2	10	3	3	10	7	0	0
47	No	Travel_Rarely	571	Sales	14	3	Medical	1	1503	3	Female	78	3	2	Sales Executive	3	Married	4591	24200	3	Y	Yes	17	3	3	80	1	11	4	2	5	4	1	10
28	Yes	Travel_Frequently	289	Research & Development	2	2	Medical	1	1504	3	Male	38	2	1	Laboratory Technician	1	Single	2561	5355	7	Y	No	11	3	3	80	0	8	2	2	0	0	0	8
29	No	Travel_Frequently	410	Research & Development	2	1	Life Sciences	1	1513	4	Female	97	3	1	Laboratory Technician	2	Married	3180	4668	0	Y	No	13	3	3	80	3	4	3	3	3	2	0	1
29	Yes	Travel_Rarely	224	Research & Development	1	4	Technical Degree	1	1522	1	Male	100	2	1	Research Scientist	1	Single	2362	7568	6	Y	No	13	3	3	80	0	11	2	1	9	7	0	1
44	No	Travel_Rarely	136	Research & Development	28	3	Life Sciences	1	1523	4	Male	32	3	4	Research Director	1	Married	16328	22074	3	Y	No	13	3	3	80	1	24	1	4	20	6	14	0
29	No	Travel_Rarely	441	Research & Development	8	1	Other	1	1544	3	Female	39	1	2	Healthcare Representative	1	Married	9715	7288	3	Y	No	13	3	3	80	1	9	3	3	7	7	0	2
42	No	Travel_Frequently	288	Research & Development	2	3	Life Sciences	1	1547	4	Male	40	3	3	Healthcare Representative	4	Married	10124	18611	2	Y	Yes	14	3	3	80	1	24	3	1	20	8	13	11
40	No	Non-Travel	1142	Research & Development	8	2	Life Sciences	1	1552	4	Male	72	3	2	Healthcare Representative	4	Divorced	4069	8841	3	Y	Yes	18	3	3	80	0	8	2	3	2	2	2	0
48	No	Travel_Rarely	492	Sales	16	4	Life Sciences	1	1557	3	Female	96	3	2	Sales Executive	3	Divorced	6439	13693	8	Y	No	14	3	3	80	1	18	2	3	8	7	7	2
38	No	Travel_Frequently	888	Human Resources	10	4	Human Resources	1	1563	3	Male	71	3	2	Human Resources	3	Married	6077	14814	3	Y	No	11	3	3	80	0	10	2	3	6	3	1	8
34	No	Travel_Rarely	479	Research & Development	7	4	Medical	1	1577	1	Male	35	3	1	Research Scientist	4	Single	2972	22061	1	Y	No	13	3	3	80	0	1	4	1	1	0	0	2
55	No	Travel_Rarely	685	Sales	26	5	Marketing	1	1578	3	Male	60	2	5	Manager	4	Married	19586	23037	1	Y	No	21	4	3	80	1	36	3	3	36	6	2	10
35	No	Travel_Rarely	670	Research & Development	10	4	Medical	1	1587	1	Female	51	3	2	Healthcare Representative	3	Single	6142	4223	3	Y	Yes	16	3	3	80	0	10	4	3	5	2	0	4
50	No	Travel_Rarely	264	Sales	9	3	Marketing	1	1591	3	Male	59	3	5	Manager	3	Married	19331	19519	4	Y	Yes	16	3	3	80	1	27	2	3	1	0	0	10
40	No	Travel_Rarely	118	Sales	14	2	Life Sciences	1	1598	4	Female	84	3	2	Sales Executive	1	Married	4639	11262	1	Y	No	15	3	3	80	1	5	2	3	5	4	1	2
43	No	Travel_Rarely	990	Research & Development	27	3	Technical Degree	1	1599	4	Male	87	4	1	Laboratory Technician	2	Divorced	4876	5855	5	Y	No	12	3	3	80	1	8	0	3	6	4	0	13
28	Yes	Travel_Rarely	329	Research & Development	24	3	Medical	1	1604	3	Male	51	3	1	Laboratory Technician	2	Married	2408	7324	1	Y	Yes	17	3	3	80	3	1	3	3	1	1	0	8
50	No	Travel_Frequently	1234	Research & Development	20	5	Medical	1	1606	2	Male	41	3	4	Healthcare Representative	3	Married	11245	20689	2	Y	Yes	15	3	3	80	1	32	3	3	30	8	12	2
21	No	Travel_Rarely	546	Research & Development	5	1	Medical	1	1623	3	Male	97	3	1	Research Scientist	4	Single	3117	26009	1	Y	No	18	3	3	80	0	3	2	3	2	2	2	0
18	Yes	Travel_Frequently	544	Sales	3	2	Medical	1	1624	2	Female	70	3	1	Sales Representative	4	Single	1569	18420	1	Y	Yes	12	3	3	80	0	0	2	4	0	0	0	17
47	No	Travel_Rarely	1176	Human Resources	26	4	Life Sciences	1	1625	4	Female	98	3	5	Manager	3	Married	19658	5220	3	Y	No	11	3	3	80	1	27	2	3	5	2	1	12
35	Yes	Travel_Rarely	737	Sales	10	3	Medical	1	1639	4	Male	55	2	3	Sales Executive	1	Married	10306	21530	9	Y	No	17	3	3	80	0	15	3	3	13	12	6	5
44	No	Travel_Frequently	602	Human Resources	1	5	Human Resources	1	1642	1	Male	37	3	2	Human Resources	4	Married	5743	10503	4	Y	Yes	11	3	3	80	0	14	3	3	10	7	0	2
24	No	Travel_Frequently	567	Research & Development	2	1	Technical Degree	1	1646	1	Female	32	3	1	Research Scientist	4	Single	3760	17218	1	Y	Yes	13	3	3	80	0	6	2	3	6	3	1	7
27	No	Travel_Frequently	591	Research & Development	2	3	Medical	1	1648	4	Male	87	3	1	Research Scientist	4	Single	2580	6297	2	Y	No	13	3	3	80	0	6	0	2	4	2	1	7
29	No	Travel_Rarely	469	Sales	10	3	Medical	1	1650	3	Male	42	2	2	Sales Executive	3	Single	5869	23413	9	Y	No	11	3	3	80	0	8	2	3	5	2	1	7
36	No	Travel_Rarely	711	Research & Development	5	4	Life Sciences	1	1651	2	Female	42	3	3	Healthcare Representative	1	Married	8008	22792	4	Y	No	12	3	3	80	2	9	6	3	3	2	0	2
25	No	Travel_Frequently	772	Research & Development	2	1	Life Sciences	1	1653	4	Male	77	4	2	Manufacturing Director	3	Divorced	5206	4973	1	Y	No	17	3	3	80	2	7	6	3	7	7	0	1
39	No	Travel_Rarely	492	Research & Development	12	3	Medical	1	1654	4	Male	66	3	2	Manufacturing Director	2	Married	5295	7693	4	Y	No	21	4	3	80	0	7	3	3	5	4	1	8
50	No	Travel_Rarely	813	Research & Development	17	5	Life Sciences	1	1656	4	Female	50	2	3	Research Director	1	Divorced	13269	21981	5	Y	No	15	3	3	80	3	19	3	3	14	11	1	0
34	No	Travel_Rarely	1130	Research & Development	3	3	Life Sciences	1	1658	4	Female	66	3	2	Research Scientist	2	Divorced	5433	19332	1	Y	No	12	3	3	80	1	11	2	3	11	8	7	2
36	No	Travel_Rarely	311	Research & Development	7	3	Life Sciences	1	1659	1	Male	77	3	1	Laboratory Technician	2	Single	2013	10950	2	Y	No	11	3	3	80	0	15	4	3	4	3	1	2
36	No	Non-Travel	894	Research & Development	1	4	Medical	1	1662	4	Female	33	2	2	Manufacturing Director	3	Married	4374	15411	0	Y	No	15	3	3	80	0	4	6	3	3	2	1	1
54	No	Travel_Rarely	584	Research & Development	22	5	Medical	1	1665	2	Female	91	3	4	Manager	3	Married	17426	18685	3	Y	No	25	4	3	80	1	36	6	3	10	8	4	3
33	No	Travel_Rarely	392	Sales	2	4	Medical	1	1670	4	Male	93	3	2	Sales Executive	4	Divorced	5505	3921	1	Y	No	14	3	3	80	2	6	5	3	6	2	0	7
32	No	Travel_Rarely	977	Research & Development	2	3	Medical	1	1671	4	Male	45	3	2	Research Scientist	2	Divorced	5470	25518	0	Y	No	13	3	3	80	2	10	4	2	9	5	1	7
47	No	Travel_Rarely	1225	Sales	2	4	Life Sciences	1	1676	2	Female	47	4	4	Manager	2	Divorced	15972	21086	6	Y	No	14	3	3	80	3	29	2	3	3	2	1	7
33	No	Non-Travel	530	Sales	16	3	Life Sciences	1	1681	3	Female	36	3	2	Sales Executive	4	Divorced	5368	16130	1	Y	Yes	25	4	3	80	1	7	2	3	6	5	1	5
53	No	Travel_Rarely	1395	Research & Development	24	4	Medical	1	1689	2	Male	48	4	3	Healthcare Representative	4	Married	7005	3458	3	Y	No	15	3	3	80	0	11	2	3	4	3	1	2
48	Yes	Travel_Frequently	708	Sales	7	2	Medical	1	1691	4	Female	95	3	1	Sales Representative	3	Married	2655	11740	2	Y	Yes	11	3	3	80	2	19	3	3	9	7	7	0
26	No	Non-Travel	786	Research & Development	7	3	Medical	1	1693	4	Male	76	3	1	Laboratory Technician	4	Single	2570	11925	1	Y	No	20	4	3	80	0	7	5	3	7	7	5	7
34	No	Travel_Rarely	1157	Research & Development	5	2	Medical	1	1696	2	Male	57	2	2	Laboratory Technician	4	Married	3986	11912	1	Y	No	14	3	3	80	1	15	3	4	15	10	4	8
60	No	Travel_Rarely	370	Research & Development	1	4	Medical	1	1697	3	Male	92	1	3	Healthcare Representative	4	Divorced	10883	20467	3	Y	No	20	4	3	80	1	19	2	4	1	0	0	7
37	No	Travel_Frequently	1278	Sales	1	4	Medical	1	1700	3	Male	31	1	2	Sales Executive	4	Divorced	9525	7677	1	Y	No	14	3	3	80	2	6	2	2	6	3	1	6
35	No	Travel_Frequently	146	Research & Development	2	4	Medical	1	1704	1	Male	79	2	1	Research Scientist	4	Single	4930	13970	0	Y	Yes	14	3	3	80	0	6	2	4	5	4	1	9
29	No	Travel_Rarely	1082	Research & Development	9	4	Medical	1	1709	4	Female	43	3	1	Laboratory Technician	3	Married	2974	25412	9	Y	No	17	3	3	80	1	9	2	3	5	3	1	2
36	No	Travel_Rarely	530	Sales	2	4	Life Sciences	1	1710	3	Female	51	3	2	Sales Representative	4	Single	4502	7439	3	Y	No	15	3	3	80	0	17	2	2	13	7	6	2
24	Yes	Travel_Rarely	240	Human Resources	22	1	Human Resources	1	1714	4	Male	58	1	1	Human Resources	3	Married	1555	11585	1	Y	No	11	3	3	80	1	1	2	3	1	0	0	10
47	Yes	Travel_Frequently	1093	Sales	9	3	Life Sciences	1	1716	3	Male	82	1	4	Sales Executive	3	Married	12936	24164	7	Y	No	11	3	3	80	0	25	3	1	23	5	14	11
26	No	Travel_Rarely	390	Research & Development	17	4	Medical	1	1718	4	Male	62	1	1	Laboratory Technician	3	Married	2305	6217	1	Y	No	15	3	3	80	3	3	3	4	3	2	0	7
45	No	Travel_Rarely	1005	Research & Development	28	2	Technical Degree	1	1719	4	Female	48	2	4	Research Director	2	Single	16704	17119	1	Y	No	11	3	3	80	0	21	2	3	21	6	8	0
23	No	Travel_Rarely	160	Research & Development	4	1	Medical	1	1735	3	Female	51	3	1	Laboratory Technician	2	Single	3295	12862	1	Y	No	13	3	3	80	0	3	3	1	3	2	1	6
32	No	Travel_Rarely	371	Sales	19	3	Life Sciences	1	1739	4	Male	80	1	3	Sales Executive	3	Married	9610	3840	3	Y	No	13	3	3	80	1	10	2	1	4	3	0	8
45	No	Travel_Rarely	176	Human Resources	4	3	Life Sciences	1	1744	3	Female	56	1	3	Human Resources	3	Married	9756	6595	4	Y	No	21	4	3	80	2	9	2	4	5	0	0	7
30	Yes	Travel_Frequently	600	Human Resources	8	3	Human Resources	1	1747	3	Female	66	2	1	Human Resources	4	Divorced	2180	9732	6	Y	No	11	3	3	80	1	6	0	2	4	2	1	1
31	No	Travel_Rarely	1003	Sales	5	3	Technical Degree	1	1749	1	Male	51	3	2	Sales Executive	3	Married	8346	20943	1	Y	No	19	3	3	80	1	6	3	3	5	2	0	10
27	No	Travel_Rarely	1054	Research & Development	8	3	Medical	1	1751	3	Female	67	3	1	Research Scientist	4	Single	3445	6152	1	Y	No	11	3	3	80	0	6	5	2	6	2	1	7
29	Yes	Travel_Rarely	428	Sales	9	3	Marketing	1	1752	2	Female	52	1	1	Sales Representative	2	Single	2760	14630	1	Y	No	13	3	3	80	0	2	3	3	2	2	2	6
49	No	Travel_Rarely	1313	Sales	11	4	Marketing	1	1757	4	Female	80	3	2	Sales Executive	4	Single	4507	8191	3	Y	No	12	3	3	80	0	8	1	4	5	1	0	2
33	Yes	Travel_Rarely	211	Sales	16	3	Life Sciences	1	1758	1	Female	74	3	3	Sales Executive	1	Single	8564	10092	2	Y	Yes	20	4	3	80	0	11	2	2	0	0	0	9
29	No	Travel_Rarely	590	Research & Development	4	3	Technical Degree	1	1762	4	Female	91	2	1	Research Scientist	1	Divorced	2109	10007	1	Y	No	13	3	3	80	1	1	2	3	1	0	0	3
30	No	Travel_Rarely	305	Research & Development	16	3	Life Sciences	1	1763	3	Male	58	4	2	Healthcare Representative	3	Married	5294	9128	3	Y	No	16	3	3	80	1	10	3	3	7	0	1	13
38	No	Travel_Rarely	833	Research & Development	18	3	Medical	1	1766	2	Male	60	1	2	Healthcare Representative	4	Married	5811	24539	3	Y	Yes	16	3	3	80	1	15	2	3	1	0	1	8
34	No	Non-Travel	1375	Sales	10	3	Life Sciences	1	1774	4	Male	87	3	2	Sales Executive	3	Divorced	4001	12313	1	Y	Yes	14	3	3	80	1	15	3	3	15	14	0	0
22	Yes	Travel_Rarely	1294	Research & Development	8	1	Medical	1	1783	3	Female	79	3	1	Laboratory Technician	1	Married	2398	15999	1	Y	Yes	17	3	3	80	0	1	6	3	1	0	0	3
46	No	Travel_Rarely	734	Research & Development	2	4	Medical	1	1789	3	Male	46	3	5	Research Director	4	Divorced	19328	14218	7	Y	Yes	17	3	3	80	1	24	3	3	2	1	2	0
44	Yes	Travel_Frequently	429	Research & Development	1	2	Medical	1	1792	3	Male	99	3	1	Research Scientist	2	Divorced	2342	11092	1	Y	Yes	12	3	3	80	3	6	2	2	5	3	2	0
37	No	Travel_Rarely	1239	Human Resources	8	2	Other	1	1794	3	Male	89	3	2	Human Resources	2	Divorced	4071	12832	2	Y	No	13	3	3	80	0	19	4	2	10	0	4	0
28	No	Travel_Rarely	1181	Research & Development	1	3	Life Sciences	1	1799	3	Male	82	3	1	Research Scientist	4	Married	2044	5531	1	Y	No	11	3	3	80	1	5	6	4	5	3	0	8
39	No	Travel_Rarely	1253	Research & Development	10	1	Medical	1	1800	3	Male	65	3	3	Research Director	3	Single	13464	7914	7	Y	No	21	4	3	80	0	9	3	3	4	3	2	9
46	No	Non-Travel	849	Sales	26	2	Life Sciences	1	1801	2	Male	98	2	2	Sales Executive	2	Single	7991	25166	8	Y	No	15	3	3	80	0	6	3	3	2	2	2	0
42	No	Travel_Rarely	1128	Research & Development	13	3	Medical	1	1803	2	Male	95	4	2	Healthcare Representative	1	Married	5538	5696	5	Y	No	18	3	3	80	2	10	2	2	0	0	0	8
35	No	Non-Travel	1180	Research & Development	2	2	Medical	1	1804	2	Male	90	3	2	Manufacturing Director	4	Divorced	5762	24442	2	Y	No	14	3	3	80	1	15	6	3	7	7	1	7
34	Yes	Travel_Frequently	234	Research & Development	9	4	Life Sciences	1	1807	4	Male	93	3	2	Laboratory Technician	1	Married	5346	6208	4	Y	No	17	3	3	80	1	11	3	2	7	1	0	0
43	No	Non-Travel	343	Research & Development	9	3	Life Sciences	1	1813	1	Male	52	3	1	Research Scientist	3	Single	2438	24978	4	Y	No	13	3	3	80	0	7	2	2	3	2	1	2
26	Yes	Travel_Rarely	920	Human Resources	20	2	Medical	1	1818	4	Female	69	3	1	Human Resources	2	Married	2148	6889	0	Y	Yes	11	3	3	80	0	6	3	3	5	1	1	3
34	No	Travel_Rarely	810	Sales	8	2	Technical Degree	1	1823	2	Male	92	4	2	Sales Executive	3	Married	6799	22128	1	Y	No	21	4	3	80	2	10	5	3	10	8	4	11
47	No	Travel_Rarely	1001	Research & Development	4	3	Life Sciences	1	1827	3	Female	92	2	3	Manufacturing Director	2	Divorced	10333	19271	8	Y	Yes	12	3	3	80	1	28	4	3	22	11	14	4
28	No	Travel_Rarely	1217	Research & Development	1	3	Medical	1	1834	3	Female	67	3	1	Research Scientist	1	Married	3591	12719	1	Y	No	25	4	3	80	1	3	3	3	3	2	1	7
18	No	Non-Travel	1431	Research & Development	14	3	Medical	1	1839	2	Female	33	3	1	Research Scientist	3	Single	1514	8018	1	Y	No	16	3	3	80	0	0	4	1	0	0	0	4
31	Yes	Travel_Rarely	359	Human Resources	18	5	Human Resources	1	1842	4	Male	89	4	1	Human Resources	1	Married	2956	21495	0	Y	No	17	3	3	80	0	2	4	3	1	0	0	2
43	No	Travel_Frequently	1422	Sales	2	4	Life Sciences	1	1849	1	Male	92	3	2	Sales Executive	4	Married	5675	19246	1	Y	No	20	4	3	80	1	7	5	3	7	7	7	3
27	No	Travel_Frequently	1297	Research & Development	5	2	Life Sciences	1	1850	4	Female	53	3	1	Laboratory Technician	4	Single	2379	19826	0	Y	Yes	14	3	3	80	0	6	3	2	5	4	0	3
32	No	Travel_Frequently	1318	Sales	10	4	Marketing	1	1853	4	Male	79	3	2	Sales Executive	4	Single	4648	26075	8	Y	No	13	3	3	80	0	4	2	4	0	0	0	2
47	No	Travel_Rarely	207	Research & Development	9	4	Life Sciences	1	1856	2	Female	64	3	1	Laboratory Technician	3	Single	2105	5411	4	Y	No	12	3	3	80	0	7	2	3	2	2	2	2
46	No	Travel_Rarely	706	Research & Development	2	2	Life Sciences	1	1857	4	Male	82	3	3	Manufacturing Director	4	Divorced	8578	19989	3	Y	No	14	3	3	80	1	12	4	2	9	8	4	5
32	Yes	Travel_Rarely	414	Sales	2	4	Marketing	1	1862	3	Male	82	2	2	Sales Executive	2	Single	9907	26186	7	Y	Yes	12	3	3	80	0	7	3	2	2	2	2	2
46	Yes	Travel_Rarely	1254	Sales	10	3	Life Sciences	1	1869	3	Female	64	3	3	Sales Executive	2	Married	7314	14011	5	Y	No	21	4	3	80	3	14	2	3	8	7	0	2
30	Yes	Travel_Rarely	945	Sales	9	3	Medical	1	1876	2	Male	89	3	1	Sales Representative	4	Single	1081	16019	1	Y	No	13	3	3	80	0	1	3	2	1	0	0	8
37	No	Travel_Rarely	783	Research & Development	7	4	Medical	1	1885	4	Male	78	3	2	Research Scientist	1	Married	4284	13588	5	Y	Yes	22	4	3	80	1	16	2	3	5	3	0	4
26	No	Travel_Rarely	482	Research & Development	1	2	Life Sciences	1	1893	2	Female	90	2	1	Research Scientist	3	Married	2933	14908	1	Y	Yes	13	3	3	80	1	1	3	2	1	0	1	7
36	No	Travel_Rarely	335	Sales	17	2	Marketing	1	1908	3	Male	33	2	2	Sales Executive	2	Married	5507	16822	2	Y	No	16	3	3	80	2	12	1	1	4	2	1	1
41	No	Travel_Rarely	337	Sales	8	3	Marketing	1	1909	3	Female	54	3	2	Sales Executive	2	Married	4393	26841	5	Y	No	21	4	3	80	1	14	3	3	5	4	1	9
34	No	Travel_Rarely	735	Sales	3	1	Medical	1	1915	4	Female	75	2	2	Sales Executive	4	Married	8103	16495	3	Y	Yes	12	3	3	80	0	9	3	2	4	2	0	4
45	No	Travel_Frequently	1297	Research & Development	1	4	Medical	1	1922	2	Male	44	3	2	Healthcare Representative	3	Single	5399	14511	4	Y	No	12	3	3	80	0	12	3	3	4	2	0	2
28	No	Travel_Frequently	783	Sales	1	2	Life Sciences	1	1927	3	Male	42	2	2	Sales Executive	4	Married	6834	19255	1	Y	Yes	12	3	3	80	1	7	2	3	7	7	0	2
39	No	Non-Travel	1251	Sales	21	4	Life Sciences	1	1929	1	Female	32	1	2	Sales Executive	3	Married	5736	3987	6	Y	No	19	3	3	80	1	10	1	3	3	2	1	2
27	No	Travel_Rarely	1354	Research & Development	2	4	Technical Degree	1	1931	2	Male	41	3	1	Research Scientist	2	Married	2226	6073	1	Y	No	11	3	3	80	1	6	3	2	5	3	1	7
47	No	Non-Travel	1169	Research & Development	14	4	Technical Degree	1	1934	3	Male	64	3	2	Research Scientist	2	Married	5467	2125	8	Y	No	18	3	3	80	1	16	4	4	8	7	1	9
56	No	Travel_Rarely	1443	Sales	11	5	Marketing	1	1935	4	Female	89	2	2	Sales Executive	1	Married	5380	20328	4	Y	No	16	3	3	80	1	6	3	3	0	0	0	3
38	No	Travel_Frequently	1394	Research & Development	8	3	Medical	1	1937	4	Female	58	2	2	Research Scientist	2	Divorced	2133	18115	1	Y	Yes	16	3	3	80	1	20	3	3	20	11	0	7
58	No	Travel_Rarely	605	Sales	21	3	Life Sciences	1	1938	4	Female	72	3	4	Manager	4	Married	17875	11761	4	Y	Yes	13	3	3	80	1	29	2	2	1	0	0	7
42	No	Travel_Rarely	419	Sales	12	4	Marketing	1	1943	2	Male	77	3	2	Sales Executive	4	Divorced	5087	2900	3	Y	Yes	12	3	3	80	2	14	4	3	0	0	0	5
28	No	Non-Travel	1103	Research & Development	16	3	Medical	1	1947	3	Male	49	3	1	Research Scientist	3	Single	2144	2122	1	Y	No	14	3	3	80	0	5	3	2	5	3	1	0
34	No	Travel_Rarely	1239	Sales	13	4	Medical	1	1951	4	Male	39	3	3	Sales Executive	3	Divorced	8628	22914	1	Y	No	18	3	3	80	1	9	2	2	8	7	1	1
31	Yes	Travel_Frequently	754	Sales	26	4	Marketing	1	1967	1	Male	63	3	2	Sales Executive	4	Married	5617	21075	1	Y	Yes	11	3	3	80	0	10	4	3	10	7	0	0
54	No	Travel_Rarely	155	Research & Development	9	2	Life Sciences	1	1969	1	Female	67	3	2	Research Scientist	3	Married	2897	22474	3	Y	No	11	3	3	80	2	9	6	2	4	3	2	2
33	No	Travel_Frequently	1303	Research & Development	7	2	Life Sciences	1	1970	4	Male	36	3	2	Healthcare Representative	3	Divorced	5968	18079	1	Y	No	20	4	3	80	3	9	2	3	9	7	2	0
31	No	Travel_Rarely	1276	Research & Development	2	1	Medical	1	1974	4	Female	59	1	1	Laboratory Technician	4	Divorced	1129	17536	1	Y	Yes	11	3	3	80	3	1	4	3	1	0	0	3
31	No	Non-Travel	697	Research & Development	10	3	Medical	1	1979	3	Female	40	3	3	Research Director	3	Married	11031	26862	4	Y	No	20	4	3	80	1	13	2	4	11	7	4	0
23	No	Travel_Rarely	571	Research & Development	12	2	Other	1	1982	4	Male	78	3	1	Laboratory Technician	4	Single	2647	13672	1	Y	No	13	3	3	80	0	5	6	4	5	2	1	4
40	No	Travel_Rarely	444	Sales	2	2	Marketing	1	1986	2	Female	92	3	2	Sales Executive	2	Married	5677	4258	3	Y	No	14	3	3	80	1	15	4	3	11	8	5	8
25	No	Travel_Rarely	309	Human Resources	2	3	Human Resources	1	1987	3	Female	82	3	1	Human Resources	2	Married	2187	19655	4	Y	No	14	3	3	80	0	6	3	3	2	0	1	2
30	No	Travel_Rarely	911	Research & Development	1	2	Medical	1	1989	4	Male	76	3	1	Laboratory Technician	2	Married	3748	4077	1	Y	No	13	3	3	80	0	12	6	2	12	8	1	2
25	No	Travel_Rarely	977	Research & Development	2	1	Other	1	1992	4	Male	57	3	1	Laboratory Technician	3	Divorced	3977	7298	6	Y	Yes	19	3	3	80	1	7	2	2	2	2	0	2
33	No	Non-Travel	1313	Research & Development	1	2	Medical	1	1994	2	Male	59	2	1	Laboratory Technician	3	Divorced	2008	20439	1	Y	No	12	3	3	80	3	1	2	2	1	1	0	3
31	No	Travel_Rarely	1154	Sales	2	2	Life Sciences	1	1996	1	Male	54	3	1	Sales Representative	3	Married	3067	6393	0	Y	No	19	3	3	80	1	3	1	3	2	2	1	0
42	No	Travel_Rarely	557	Research & Development	18	4	Life Sciences	1	1998	4	Male	35	3	2	Research Scientist	1	Divorced	5410	11189	6	Y	Yes	17	3	3	80	1	9	3	2	4	3	1	6
35	No	Travel_Rarely	1490	Research & Development	11	4	Medical	1	2003	4	Male	43	3	1	Laboratory Technician	3	Married	2660	20232	7	Y	Yes	11	3	3	80	1	5	3	3	2	2	2	3
32	No	Travel_Rarely	267	Research & Development	29	4	Life Sciences	1	2010	3	Female	49	2	1	Laboratory Technician	2	Single	2837	15919	1	Y	No	13	3	3	80	0	6	3	3	6	2	4	3
40	No	Travel_Rarely	543	Research & Development	1	4	Life Sciences	1	2012	1	Male	83	3	1	Laboratory Technician	4	Married	2406	4060	8	Y	No	19	3	3	80	2	8	3	2	1	0	0	2
32	No	Travel_Rarely	801	Sales	1	4	Marketing	1	2016	3	Female	48	3	3	Sales Executive	4	Married	10422	24032	1	Y	No	19	3	3	80	2	14	3	3	14	10	5	3
44	No	Travel_Rarely	1037	Research & Development	1	3	Medical	1	2020	2	Male	42	3	1	Research Scientist	4	Single	2436	13422	6	Y	Yes	12	3	3	80	0	6	2	3	4	3	1	7
39	No	Non-Travel	105	Research & Development	9	3	Life Sciences	1	2022	4	Male	87	3	5	Manager	4	Single	19431	15302	2	Y	No	13	3	3	80	0	21	3	2	6	0	1	9
36	No	Travel_Rarely	557	Sales	3	3	Medical	1	2024	1	Female	94	2	3	Sales Executive	4	Married	7644	12695	0	Y	No	19	3	3	80	2	10	2	3	9	7	3	3
41	No	Travel_Rarely	582	Research & Development	28	4	Life Sciences	1	2034	1	Female	60	2	4	Manufacturing Director	2	Married	13570	5640	0	Y	No	23	4	3	80	1	21	3	3	20	7	0	0
41	No	Travel_Rarely	930	Sales	3	3	Life Sciences	1	2037	3	Male	57	2	2	Sales Executive	2	Divorced	8938	12227	2	Y	No	11	3	3	80	1	14	5	3	5	4	0	7
35	No	Travel_Rarely	1146	Human Resources	26	4	Life Sciences	1	2040	3	Female	31	3	3	Human Resources	4	Single	8837	16642	1	Y	Yes	16	3	3	80	0	9	2	3	9	0	1	7
38	No	Travel_Rarely	345	Sales	10	2	Life Sciences	1	2041	1	Female	100	3	2	Sales Executive	4	Married	5343	5982	1	Y	No	11	3	3	80	1	10	1	3	10	7	1	2
45	No	Travel_Rarely	374	Sales	20	3	Life Sciences	1	2046	4	Female	50	3	2	Sales Executive	3	Single	4850	23333	8	Y	No	15	3	3	80	0	8	3	3	5	3	0	2
36	No	Travel_Frequently	884	Research & Development	23	2	Medical	1	2061	3	Male	41	4	2	Laboratory Technician	4	Married	2571	12290	4	Y	No	17	3	3	80	1	17	3	3	5	2	0	2
49	No	Travel_Frequently	279	Research & Development	8	1	Life Sciences	1	2	3	Male	61	2	2	Research Scientist	2	Married	5130	24907	1	Y	No	23	4	4	80	1	10	3	3	10	7	1	2
27	No	Travel_Rarely	591	Research & Development	2	1	Medical	1	7	1	Male	40	3	1	Laboratory Technician	2	Married	3468	16632	9	Y	No	12	3	4	80	1	6	3	3	2	2	2	2
29	No	Travel_Rarely	153	Research & Development	15	2	Life Sciences	1	15	4	Female	49	2	2	Laboratory Technician	3	Single	4193	12682	0	Y	Yes	12	3	4	80	0	10	3	3	9	5	0	8
31	No	Travel_Rarely	670	Research & Development	26	1	Life Sciences	1	16	1	Male	31	3	1	Research Scientist	3	Divorced	2911	15170	1	Y	No	17	3	4	80	1	5	1	2	5	2	4	3
32	No	Travel_Rarely	334	Research & Development	5	2	Life Sciences	1	21	1	Male	80	4	1	Research Scientist	2	Divorced	3298	15053	0	Y	Yes	12	3	4	80	2	7	5	2	6	2	0	3
24	No	Non-Travel	673	Research & Development	11	2	Other	1	26	1	Female	96	4	2	Manufacturing Director	3	Divorced	4011	8232	0	Y	No	18	3	4	80	1	5	5	2	4	2	1	8
21	No	Travel_Rarely	391	Research & Development	15	2	Life Sciences	1	30	3	Male	96	3	1	Research Scientist	4	Single	1232	19281	1	Y	No	14	3	4	80	0	0	6	3	0	0	0	2
53	No	Travel_Rarely	1282	Research & Development	5	3	Other	1	32	3	Female	58	3	5	Manager	3	Divorced	19094	10735	4	Y	No	11	3	4	80	1	26	3	2	14	13	4	2
42	No	Travel_Rarely	691	Sales	8	4	Marketing	1	35	3	Male	48	3	2	Sales Executive	2	Married	6825	21173	0	Y	No	11	3	4	80	1	10	2	3	9	7	4	3
44	No	Travel_Rarely	477	Research & Development	7	4	Medical	1	36	1	Female	42	2	3	Healthcare Representative	4	Married	10248	2094	3	Y	No	14	3	4	80	1	24	4	3	22	6	5	3
46	No	Travel_Rarely	705	Sales	2	4	Marketing	1	38	2	Female	83	3	5	Manager	1	Single	18947	22822	3	Y	No	12	3	4	80	0	22	2	2	2	2	2	12
33	No	Travel_Rarely	924	Research & Development	2	3	Medical	1	39	3	Male	78	3	1	Laboratory Technician	4	Single	2496	6670	4	Y	No	11	3	4	80	0	7	3	3	1	1	0	2
44	No	Travel_Rarely	1459	Research & Development	10	4	Other	1	40	4	Male	41	3	2	Healthcare Representative	4	Married	6465	19121	2	Y	Yes	13	3	4	80	0	9	5	4	4	2	1	8
43	No	Travel_Rarely	1273	Research & Development	2	2	Medical	1	46	4	Female	72	4	1	Research Scientist	3	Divorced	2645	21923	1	Y	No	12	3	4	80	2	6	3	2	5	3	1	0
36	No	Travel_Rarely	852	Research & Development	5	4	Life Sciences	1	51	2	Female	82	2	1	Research Scientist	1	Married	3419	13072	9	Y	Yes	14	3	4	80	1	6	3	4	1	1	0	0
27	No	Travel_Rarely	1240	Research & Development	2	4	Life Sciences	1	54	4	Female	33	3	1	Laboratory Technician	1	Divorced	2341	19715	1	Y	No	13	3	4	80	1	1	6	3	1	0	0	8
27	No	Travel_Frequently	994	Sales	8	3	Life Sciences	1	56	4	Male	37	3	3	Sales Executive	3	Single	8726	2975	1	Y	No	15	3	4	80	0	9	0	3	9	8	1	7
30	No	Travel_Frequently	721	Research & Development	1	2	Medical	1	57	3	Female	58	3	2	Laboratory Technician	4	Single	4011	10781	1	Y	No	23	4	4	80	0	12	2	3	12	8	3	9
41	Yes	Travel_Rarely	1360	Research & Development	12	3	Technical Degree	1	58	2	Female	49	3	5	Research Director	3	Married	19545	16280	1	Y	No	12	3	4	80	0	23	0	3	22	15	15	2
35	No	Travel_Rarely	1229	Research & Development	8	1	Life Sciences	1	63	4	Male	36	4	1	Laboratory Technician	4	Married	2269	4892	1	Y	No	19	3	4	80	0	1	2	3	1	0	0	0
48	Yes	Travel_Rarely	626	Research & Development	1	2	Life Sciences	1	64	1	Male	98	2	3	Laboratory Technician	3	Single	5381	19294	9	Y	Yes	13	3	4	80	0	23	2	3	1	0	0	10
35	No	Travel_Frequently	853	Sales	18	5	Life Sciences	1	74	2	Male	71	3	3	Sales Executive	1	Married	9069	11031	1	Y	No	22	4	4	80	1	9	3	2	9	8	1	0
31	No	Travel_Rarely	655	Research & Development	7	4	Life Sciences	1	76	4	Male	48	3	2	Laboratory Technician	4	Divorced	5915	9528	3	Y	No	22	4	4	80	1	10	3	2	7	7	1	0
38	No	Travel_Frequently	653	Research & Development	29	5	Life Sciences	1	79	4	Female	50	3	2	Laboratory Technician	4	Single	2406	5456	1	Y	No	11	3	4	80	0	10	2	3	10	3	9	0
50	No	Travel_Rarely	989	Research & Development	7	2	Medical	1	80	2	Female	43	2	5	Research Director	3	Divorced	18740	16701	5	Y	Yes	12	3	4	80	1	29	2	2	27	3	13	2
59	No	Travel_Rarely	1435	Sales	25	3	Life Sciences	1	81	1	Female	99	3	3	Sales Executive	1	Single	7637	2354	7	Y	No	11	3	4	80	0	28	3	2	21	16	7	4
35	No	Travel_Frequently	664	Research & Development	1	3	Medical	1	88	2	Male	79	3	1	Research Scientist	1	Married	2194	5868	4	Y	No	13	3	4	80	1	5	2	2	3	2	1	3
59	No	Travel_Frequently	1225	Sales	1	1	Life Sciences	1	91	1	Female	57	2	2	Sales Executive	3	Single	5473	24668	7	Y	No	11	3	4	80	0	20	2	2	4	3	1	2
29	No	Travel_Rarely	1328	Research & Development	2	3	Life Sciences	1	94	3	Male	76	3	1	Research Scientist	2	Married	2703	4956	0	Y	No	23	4	4	80	1	6	3	3	5	4	0	2
31	No	Travel_Rarely	746	Research & Development	8	4	Life Sciences	1	98	3	Female	61	3	2	Manufacturing Director	4	Single	4424	20682	1	Y	No	23	4	4	80	0	11	2	3	11	7	1	2
46	No	Travel_Rarely	945	Human Resources	5	2	Medical	1	103	2	Male	80	3	2	Human Resources	2	Divorced	5021	10425	8	Y	Yes	22	4	4	80	1	16	2	3	4	2	0	0
55	No	Travel_Rarely	111	Sales	1	2	Life Sciences	1	106	1	Male	70	3	3	Sales Executive	4	Married	10239	18092	3	Y	No	14	3	4	80	1	24	4	3	1	0	1	0
38	No	Non-Travel	573	Research & Development	6	3	Medical	1	107	2	Female	79	1	2	Research Scientist	4	Divorced	5329	15717	7	Y	Yes	12	3	4	80	3	17	3	3	13	11	1	3
46	Yes	Travel_Rarely	669	Sales	9	2	Medical	1	118	3	Male	64	2	3	Sales Executive	4	Single	9619	13596	1	Y	No	16	3	4	80	0	9	3	3	9	8	4	2
40	No	Travel_Frequently	530	Research & Development	1	4	Life Sciences	1	119	3	Male	78	2	4	Healthcare Representative	2	Married	13503	14115	1	Y	No	22	4	4	80	1	22	3	2	22	3	11	2
51	No	Travel_Rarely	632	Sales	21	4	Marketing	1	120	3	Male	71	3	2	Sales Executive	4	Single	5441	8423	0	Y	Yes	22	4	4	80	0	11	2	1	10	7	1	7
37	Yes	Travel_Rarely	807	Human Resources	6	4	Human Resources	1	133	3	Male	63	3	1	Human Resources	1	Divorced	2073	23648	4	Y	Yes	22	4	4	80	0	7	3	3	3	2	0	0
32	No	Travel_Rarely	827	Research & Development	1	1	Life Sciences	1	134	4	Male	71	3	1	Research Scientist	1	Single	2956	15178	1	Y	No	13	3	4	80	0	1	2	3	1	0	0	0
37	No	Non-Travel	1040	Research & Development	2	2	Life Sciences	1	139	3	Male	100	2	2	Healthcare Representative	4	Divorced	5163	15850	5	Y	No	14	3	4	80	1	17	2	4	1	0	0	12
59	No	Non-Travel	1420	Human Resources	2	4	Human Resources	1	140	3	Female	32	2	5	Manager	4	Married	18844	21922	9	Y	No	21	4	4	80	1	30	3	3	3	2	2	7
25	Yes	Travel_Rarely	240	Sales	5	3	Marketing	1	142	3	Male	46	2	2	Sales Executive	3	Single	5744	26959	1	Y	Yes	11	3	4	80	0	6	1	3	6	4	0	17
34	Yes	Travel_Frequently	658	Research & Development	7	3	Life Sciences	1	147	1	Male	66	1	2	Laboratory Technician	3	Single	6074	22887	1	Y	Yes	24	4	4	80	0	9	3	3	9	7	0	2
34	No	Travel_Rarely	1354	Research & Development	5	3	Medical	1	153	3	Female	45	2	3	Manager	1	Single	11631	5615	2	Y	No	12	3	4	80	0	14	6	3	11	10	5	1
43	No	Travel_Frequently	394	Sales	26	2	Life Sciences	1	158	3	Male	92	3	4	Manager	4	Married	16959	19494	1	Y	Yes	12	3	4	80	2	25	3	4	25	12	4	3
58	Yes	Travel_Rarely	147	Research & Development	23	4	Medical	1	165	4	Female	94	3	3	Healthcare Representative	4	Married	10312	3465	1	Y	No	12	3	4	80	1	40	3	2	40	10	15	2
19	Yes	Travel_Rarely	528	Sales	22	1	Marketing	1	167	4	Male	50	3	1	Sales Representative	3	Single	1675	26820	1	Y	Yes	19	3	4	80	0	0	2	2	0	0	0	0
43	No	Travel_Frequently	957	Research & Development	28	3	Medical	1	171	2	Female	72	4	1	Research Scientist	3	Single	4739	16090	4	Y	No	12	3	4	80	0	18	2	3	3	2	1	6
50	No	Travel_Frequently	809	Sales	12	3	Marketing	1	174	3	Female	77	3	3	Sales Executive	4	Single	9208	6645	4	Y	No	11	3	4	80	0	16	3	3	2	2	2	7
26	No	Travel_Rarely	1355	Human Resources	25	1	Life Sciences	1	177	3	Female	61	3	1	Human Resources	3	Married	2942	8916	1	Y	No	23	4	4	80	1	8	3	3	8	7	5	9
36	No	Travel_Rarely	216	Research & Development	6	2	Medical	1	178	2	Male	84	3	2	Manufacturing Director	2	Divorced	4941	2819	6	Y	No	20	4	4	80	2	7	0	3	3	2	0	7
51	Yes	Travel_Frequently	1150	Research & Development	8	4	Life Sciences	1	179	1	Male	53	1	3	Manufacturing Director	4	Single	10650	25150	2	Y	No	15	3	4	80	0	18	2	3	4	2	0	0
25	No	Travel_Rarely	959	Sales	28	3	Life Sciences	1	183	1	Male	41	2	2	Sales Executive	3	Married	8639	24835	2	Y	No	18	3	4	80	0	6	3	3	2	2	2	7
30	No	Travel_Rarely	1240	Human Resources	9	3	Human Resources	1	184	3	Male	48	3	2	Human Resources	4	Married	6347	13982	0	Y	Yes	19	3	4	80	0	12	2	1	11	9	4	7
32	No	Travel_Frequently	689	Sales	9	2	Medical	1	195	4	Male	35	1	2	Sales Executive	4	Divorced	4668	22812	0	Y	No	17	3	4	80	3	9	2	4	8	7	0	2
30	No	Travel_Rarely	201	Research & Development	5	3	Technical Degree	1	197	4	Female	84	3	1	Research Scientist	1	Divorced	3204	10415	5	Y	No	14	3	4	80	1	8	3	3	3	2	2	3
30	No	Travel_Rarely	1427	Research & Development	2	1	Medical	1	198	2	Male	35	2	1	Laboratory Technician	4	Single	2720	11162	0	Y	No	13	3	4	80	0	6	3	3	5	3	1	9
41	No	Travel_Rarely	933	Research & Development	9	4	Life Sciences	1	200	3	Male	94	3	1	Laboratory Technician	1	Married	2238	6961	2	Y	No	21	4	4	80	1	7	2	3	5	0	1	1
19	No	Travel_Rarely	1181	Research & Development	3	1	Medical	1	201	2	Female	79	3	1	Laboratory Technician	2	Single	1483	16102	1	Y	No	14	3	4	80	0	1	3	3	1	0	0	7
53	No	Travel_Rarely	1436	Sales	6	2	Marketing	1	205	2	Male	34	3	2	Sales Representative	3	Married	2306	16047	2	Y	Yes	20	4	4	80	1	13	3	1	7	7	4	7
32	No	Travel_Frequently	967	Sales	8	3	Marketing	1	207	2	Female	43	3	3	Sales Executive	4	Single	8998	15589	1	Y	No	14	3	4	80	0	9	2	3	9	8	3	0
34	No	Travel_Frequently	303	Sales	2	4	Marketing	1	216	3	Female	75	3	1	Sales Representative	3	Married	2231	11314	6	Y	No	18	3	4	80	1	6	3	3	4	3	1	2
27	No	Non-Travel	691	Research & Development	9	3	Medical	1	218	4	Male	57	3	1	Research Scientist	2	Divorced	2024	5970	6	Y	No	18	3	4	80	1	6	1	1	2	2	2	7
27	No	Non-Travel	1450	Research & Development	3	3	Medical	1	224	3	Male	79	2	1	Research Scientist	3	Divorced	2566	25326	1	Y	Yes	15	3	4	80	1	1	2	2	1	1	0	2
27	No	Travel_Rarely	1157	Research & Development	17	3	Technical Degree	1	233	3	Male	51	3	1	Research Scientist	2	Married	3058	13364	0	Y	Yes	16	3	4	80	1	6	3	2	5	2	1	5
34	No	Travel_Rarely	629	Research & Development	27	2	Medical	1	247	4	Female	95	3	1	Research Scientist	2	Single	2311	5711	2	Y	No	15	3	4	80	0	9	3	3	3	2	1	2
41	Yes	Travel_Rarely	1356	Sales	20	2	Marketing	1	248	2	Female	70	3	1	Sales Representative	2	Single	3140	21728	1	Y	Yes	22	4	4	80	0	4	5	2	4	3	0	7
50	No	Travel_Rarely	328	Research & Development	1	3	Medical	1	249	3	Male	86	2	1	Laboratory Technician	3	Married	3690	3425	2	Y	No	15	3	4	80	1	5	2	2	3	2	0	0
33	No	Travel_Rarely	931	Research & Development	14	3	Medical	1	252	4	Female	72	3	1	Research Scientist	2	Married	2756	4673	1	Y	No	13	3	4	80	1	8	5	3	8	7	1	2
55	No	Travel_Rarely	692	Research & Development	14	4	Medical	1	254	3	Male	61	4	5	Research Director	2	Single	18722	13339	8	Y	No	11	3	4	80	0	36	3	3	24	15	2	7
27	No	Travel_Rarely	894	Research & Development	9	3	Medical	1	260	4	Female	99	3	1	Research Scientist	2	Single	2279	11781	1	Y	No	16	3	4	80	0	7	2	2	7	7	0	2
43	No	Non-Travel	1344	Research & Development	7	3	Medical	1	262	4	Male	37	4	1	Research Scientist	4	Divorced	2089	5228	4	Y	No	14	3	4	80	3	7	3	4	5	4	2	2
45	No	Non-Travel	1195	Research & Development	2	2	Medical	1	264	1	Male	65	2	4	Manager	4	Married	16792	20462	9	Y	No	23	4	4	80	1	22	1	3	20	8	11	3
35	No	Travel_Frequently	138	Research & Development	2	3	Medical	1	269	2	Female	37	3	2	Laboratory Technician	2	Single	4425	15986	5	Y	No	11	3	4	80	0	10	5	3	6	2	1	0
34	No	Travel_Frequently	878	Research & Development	10	4	Medical	1	277	4	Male	43	3	1	Research Scientist	3	Divorced	3815	5972	1	Y	Yes	17	3	4	80	1	5	4	4	5	3	2	9
29	Yes	Travel_Rarely	121	Sales	27	3	Marketing	1	283	2	Female	35	3	3	Sales Executive	4	Married	7639	24525	1	Y	No	22	4	4	80	3	10	3	2	10	4	1	4
40	No	Non-Travel	1151	Research & Development	9	5	Life Sciences	1	287	4	Male	63	2	2	Healthcare Representative	4	Married	4876	14242	9	Y	No	14	3	4	80	1	5	5	1	3	2	0	2
27	No	Travel_Frequently	1242	Sales	20	3	Life Sciences	1	293	4	Female	90	3	2	Sales Executive	3	Single	9981	12916	1	Y	No	14	3	4	80	0	7	2	3	7	7	0	6
51	No	Travel_Rarely	1469	Research & Development	8	4	Life Sciences	1	296	2	Male	81	2	3	Research Director	2	Married	12490	15736	5	Y	No	16	3	4	80	2	16	5	1	10	9	4	0
29	Yes	Travel_Rarely	992	Research & Development	1	3	Technical Degree	1	300	3	Male	85	3	1	Research Scientist	3	Single	2058	19757	0	Y	No	14	3	4	80	0	7	1	2	6	2	1	13
45	No	Non-Travel	1052	Sales	6	3	Medical	1	302	4	Female	57	2	3	Sales Executive	4	Single	8865	16840	6	Y	No	12	3	4	80	0	23	2	3	19	7	12	1
54	No	Travel_Rarely	1147	Sales	3	3	Marketing	1	303	4	Female	52	3	2	Sales Executive	1	Married	5940	17011	2	Y	No	14	3	4	80	1	16	4	3	6	2	0	0
36	No	Travel_Rarely	1396	Research & Development	5	2	Life Sciences	1	304	4	Male	62	3	2	Laboratory Technician	2	Single	5914	9945	8	Y	No	16	3	4	80	0	16	3	4	13	11	3	7
33	No	Travel_Rarely	147	Research & Development	4	4	Medical	1	305	3	Female	47	2	1	Research Scientist	2	Married	2622	13248	6	Y	No	21	4	4	80	0	7	3	3	3	2	1	2
31	No	Non-Travel	979	Research & Development	1	4	Medical	1	308	3	Male	90	1	2	Manufacturing Director	3	Married	4345	4381	0	Y	No	12	3	4	80	1	6	2	3	5	4	1	0
29	No	Travel_Frequently	1413	Sales	1	1	Medical	1	312	2	Female	42	3	3	Sales Executive	4	Married	7918	6599	1	Y	No	14	3	4	80	1	11	5	3	11	10	4	5
42	No	Travel_Rarely	532	Research & Development	4	2	Technical Degree	1	319	3	Male	58	3	5	Manager	4	Married	19232	4933	1	Y	No	11	3	4	80	0	22	3	3	22	17	11	4
59	No	Travel_Rarely	818	Human Resources	6	2	Medical	1	321	2	Male	52	3	1	Human Resources	3	Married	2267	25657	8	Y	No	17	3	4	80	0	7	2	2	2	2	2	6
52	No	Non-Travel	771	Sales	2	4	Life Sciences	1	329	1	Male	79	2	5	Manager	3	Single	19068	21030	1	Y	Yes	18	3	4	80	0	33	2	4	33	7	15	3
32	Yes	Travel_Rarely	515	Research & Development	1	3	Life Sciences	1	331	4	Male	62	2	1	Laboratory Technician	3	Single	3730	9571	0	Y	Yes	14	3	4	80	0	4	2	1	3	2	1	0
45	No	Travel_Frequently	1199	Research & Development	7	4	Life Sciences	1	341	1	Male	77	4	2	Manufacturing Director	3	Married	6434	5118	4	Y	No	17	3	4	80	1	9	1	3	3	2	0	2
39	No	Travel_Frequently	505	Research & Development	2	4	Technical Degree	1	343	3	Female	64	3	3	Healthcare Representative	3	Single	10938	6420	0	Y	No	25	4	4	80	0	20	1	3	19	6	11	2
29	No	Travel_Rarely	1247	Sales	20	2	Marketing	1	349	4	Male	45	3	2	Sales Executive	4	Divorced	6931	10732	2	Y	No	14	3	4	80	1	10	2	3	3	2	0	1
25	No	Travel_Rarely	685	Research & Development	1	3	Life Sciences	1	350	1	Female	62	3	2	Manufacturing Director	3	Married	4898	7505	0	Y	No	12	3	4	80	2	5	3	3	4	2	1	8
40	No	Travel_Rarely	1416	Research & Development	2	2	Medical	1	352	1	Male	49	3	5	Research Director	3	Divorced	19436	5949	0	Y	No	19	3	4	80	1	22	5	3	21	7	3	7
38	No	Non-Travel	1327	Sales	2	2	Life Sciences	1	361	4	Male	39	2	2	Sales Executive	4	Married	5249	19682	3	Y	No	18	3	4	80	1	13	0	3	8	7	7	2
32	No	Travel_Rarely	128	Research & Development	2	1	Technical Degree	1	362	4	Male	84	2	2	Laboratory Technician	1	Single	2176	19737	4	Y	No	13	3	4	80	0	9	5	3	6	2	0	2
25	No	Non-Travel	675	Research & Development	5	2	Life Sciences	1	369	2	Male	85	4	2	Healthcare Representative	1	Divorced	4000	18384	1	Y	No	12	3	4	80	2	6	2	3	6	3	1	1
47	Yes	Non-Travel	666	Research & Development	29	4	Life Sciences	1	376	1	Male	88	3	3	Manager	2	Married	11849	10268	1	Y	Yes	12	3	4	80	1	10	2	2	10	7	9	12
28	No	Travel_Rarely	1158	Research & Development	9	3	Medical	1	377	4	Male	94	3	1	Research Scientist	4	Married	2070	2613	1	Y	No	23	4	4	80	1	5	3	2	5	2	0	0
53	No	Travel_Rarely	1070	Research & Development	3	4	Medical	1	386	3	Male	45	3	4	Research Director	3	Married	17584	21016	3	Y	Yes	16	3	4	80	3	21	5	2	5	3	1	3
55	No	Travel_Rarely	147	Research & Development	20	2	Technical Degree	1	389	2	Male	37	3	2	Laboratory Technician	4	Married	5415	15972	3	Y	Yes	19	3	4	80	1	12	4	3	10	7	0	13
44	Yes	Travel_Frequently	920	Research & Development	24	3	Life Sciences	1	392	4	Male	43	3	1	Laboratory Technician	3	Divorced	3161	19920	3	Y	Yes	22	4	4	80	1	19	0	1	1	0	0	2
26	Yes	Travel_Rarely	1449	Research & Development	16	4	Medical	1	394	1	Male	45	3	1	Laboratory Technician	2	Divorced	2373	14180	2	Y	Yes	13	3	4	80	1	5	2	3	3	2	0	10
28	No	Travel_Rarely	1117	Research & Development	8	2	Life Sciences	1	395	4	Female	66	3	1	Research Scientist	4	Single	3310	4488	1	Y	No	21	4	4	80	0	5	3	3	5	3	0	1
49	No	Travel_Frequently	636	Research & Development	10	4	Life Sciences	1	396	3	Female	35	3	5	Research Director	1	Single	18665	25594	9	Y	Yes	11	3	4	80	0	22	4	3	3	2	1	4
36	No	Travel_Rarely	506	Research & Development	3	3	Technical Degree	1	397	3	Male	30	3	2	Research Scientist	2	Single	4485	26285	4	Y	No	12	3	4	80	0	10	2	3	8	0	7	5
42	No	Travel_Frequently	555	Sales	26	3	Marketing	1	404	3	Female	77	3	4	Sales Executive	2	Married	13525	14864	5	Y	No	14	3	4	80	1	23	2	4	20	4	4	3
36	No	Travel_Frequently	566	Research & Development	18	4	Life Sciences	1	407	3	Male	81	4	1	Laboratory Technician	4	Married	3688	7122	4	Y	No	18	3	4	80	2	4	2	3	1	0	0	1
51	No	Travel_Rarely	1302	Research & Development	2	3	Medical	1	408	4	Male	84	1	2	Manufacturing Director	2	Divorced	5482	16321	5	Y	No	18	3	4	80	1	13	3	3	4	1	1	2
58	No	Non-Travel	390	Research & Development	1	4	Life Sciences	1	422	4	Male	32	1	2	Healthcare Representative	3	Divorced	5660	17056	2	Y	Yes	13	3	4	80	1	12	2	3	5	3	1	4
31	No	Travel_Rarely	106	Human Resources	2	3	Human Resources	1	424	1	Male	62	2	2	Human Resources	1	Married	6410	17822	3	Y	No	12	3	4	80	0	9	1	3	2	2	1	7
39	No	Travel_Rarely	117	Research & Development	10	1	Medical	1	429	3	Male	99	3	4	Manager	1	Married	17068	5355	1	Y	Yes	14	3	4	80	0	21	3	3	21	9	11	7
49	No	Travel_Rarely	1091	Research & Development	1	2	Technical Degree	1	431	3	Female	90	2	4	Healthcare Representative	3	Single	13964	17810	7	Y	Yes	12	3	4	80	0	25	2	3	7	1	0	10
32	No	Travel_Rarely	588	Sales	8	2	Technical Degree	1	436	3	Female	65	2	2	Sales Executive	2	Married	5228	24624	1	Y	Yes	11	3	4	80	0	13	2	3	13	12	11	0
31	No	Travel_Rarely	691	Sales	7	3	Marketing	1	438	4	Male	73	3	2	Sales Executive	4	Divorced	7547	7143	4	Y	No	12	3	4	80	3	13	3	3	7	7	1	2
28	Yes	Travel_Rarely	1157	Research & Development	2	4	Medical	1	440	1	Male	84	1	1	Research Scientist	4	Married	3464	24737	5	Y	Yes	13	3	4	80	0	5	4	2	3	2	2	0
30	No	Travel_Rarely	1275	Research & Development	28	2	Medical	1	441	4	Female	64	3	2	Research Scientist	4	Married	5775	11934	1	Y	No	13	3	4	80	2	11	2	3	10	8	1	0
27	No	Non-Travel	210	Sales	1	1	Marketing	1	449	3	Male	73	3	2	Sales Executive	2	Married	6349	22107	0	Y	Yes	13	3	4	80	1	6	0	3	5	4	1	7
54	No	Travel_Frequently	928	Research & Development	20	4	Life Sciences	1	450	4	Female	31	3	2	Research Scientist	3	Single	4869	16885	3	Y	No	12	3	4	80	0	20	4	2	4	3	0	12
29	Yes	Travel_Rarely	318	Research & Development	8	4	Other	1	454	2	Male	77	1	1	Laboratory Technician	1	Married	2119	4759	1	Y	Yes	11	3	4	80	0	7	4	2	7	7	0	9
35	No	Travel_Rarely	1296	Research & Development	5	4	Technical Degree	1	464	3	Male	62	3	3	Manufacturing Director	2	Single	8095	18264	0	Y	No	13	3	4	80	0	17	5	3	16	6	0	2
41	No	Travel_Rarely	483	Research & Development	6	3	Medical	1	466	4	Male	95	2	2	Manufacturing Director	2	Single	6032	10110	6	Y	Yes	15	3	4	80	0	8	3	3	5	4	1	8
50	No	Travel_Rarely	1046	Research & Development	10	3	Technical Degree	1	491	4	Male	100	2	3	Healthcare Representative	4	Single	10496	2755	6	Y	No	15	3	4	80	0	20	2	3	4	3	1	9
31	No	Travel_Rarely	408	Research & Development	9	4	Life Sciences	1	493	3	Male	42	2	1	Research Scientist	2	Single	2657	7551	0	Y	Yes	16	3	4	80	0	3	5	3	2	2	2	2
21	Yes	Travel_Rarely	156	Sales	12	3	Life Sciences	1	494	3	Female	90	4	1	Sales Representative	2	Single	2716	25422	1	Y	No	15	3	4	80	0	1	0	3	1	0	0	0
29	No	Travel_Rarely	1283	Research & Development	23	3	Life Sciences	1	495	4	Male	54	3	1	Research Scientist	4	Single	2201	18168	9	Y	No	16	3	4	80	0	6	4	3	3	2	1	7
28	No	Travel_Rarely	304	Sales	9	4	Life Sciences	1	498	2	Male	92	3	2	Sales Executive	4	Single	5253	20750	1	Y	No	16	3	4	80	0	7	1	3	7	5	0	3
24	No	Travel_Rarely	1371	Sales	10	4	Marketing	1	507	4	Female	77	3	2	Sales Executive	3	Divorced	4260	5915	1	Y	Yes	12	3	4	80	1	5	2	4	5	2	0	2
22	No	Travel_Rarely	253	Research & Development	11	3	Medical	1	511	1	Female	43	3	1	Research Scientist	2	Married	2244	24440	1	Y	No	13	3	4	80	1	2	1	3	2	1	1	2
37	No	Travel_Rarely	1305	Research & Development	10	4	Life Sciences	1	518	3	Male	49	3	2	Manufacturing Director	2	Single	4197	21123	2	Y	Yes	12	3	4	80	0	18	2	2	1	0	0	2
43	No	Travel_Rarely	1473	Research & Development	8	4	Other	1	526	3	Female	74	3	2	Healthcare Representative	3	Divorced	4522	2227	4	Y	Yes	14	3	4	80	0	8	3	3	5	2	0	3
56	No	Travel_Frequently	906	Sales	6	3	Life Sciences	1	532	3	Female	86	4	4	Sales Executive	1	Married	13212	18256	9	Y	No	11	3	4	80	3	36	0	2	7	7	7	2
28	No	Travel_Rarely	1300	Research & Development	17	2	Medical	1	536	3	Male	79	3	2	Laboratory Technician	1	Divorced	4558	13535	1	Y	No	12	3	4	80	1	10	2	3	10	0	1	2
45	No	Travel_Rarely	192	Research & Development	10	2	Life Sciences	1	544	1	Male	69	3	1	Research Scientist	4	Married	2654	9655	3	Y	No	21	4	4	80	2	8	3	2	2	2	0	3
52	No	Travel_Rarely	1490	Research & Development	4	2	Life Sciences	1	546	4	Female	30	3	4	Manager	4	Married	16555	10310	2	Y	No	13	3	4	80	0	31	2	1	5	2	1	4
60	No	Travel_Rarely	422	Research & Development	7	3	Life Sciences	1	549	1	Female	41	3	5	Manager	1	Married	19566	3854	5	Y	No	11	3	4	80	0	33	5	1	29	8	11	2
42	No	Travel_Frequently	1368	Research & Development	28	4	Technical Degree	1	551	4	Female	88	2	2	Healthcare Representative	4	Married	4523	4386	0	Y	No	11	3	4	80	3	7	4	4	6	5	0	7
34	Yes	Travel_Frequently	296	Sales	6	2	Marketing	1	555	4	Female	33	1	1	Sales Representative	3	Divorced	2351	12253	0	Y	No	16	3	4	80	1	3	3	2	2	2	1	0
40	No	Travel_Rarely	1398	Sales	2	4	Life Sciences	1	558	3	Female	79	3	5	Manager	3	Married	18041	13022	0	Y	No	14	3	4	80	0	21	2	3	20	15	1	2
60	No	Travel_Frequently	1499	Sales	28	3	Marketing	1	573	3	Female	80	2	3	Sales Executive	1	Married	10266	2845	4	Y	No	19	3	4	80	0	22	5	4	18	13	13	11
31	No	Travel_Rarely	1274	Research & Development	9	1	Life Sciences	1	581	3	Male	33	3	3	Manufacturing Director	2	Divorced	10648	14394	1	Y	No	25	4	4	80	1	13	6	4	13	8	0	2
33	Yes	Travel_Rarely	1277	Research & Development	15	1	Medical	1	582	2	Male	56	3	3	Manager	3	Married	13610	24619	7	Y	Yes	12	3	4	80	0	15	2	4	7	6	7	9
42	No	Travel_Frequently	1474	Research & Development	5	2	Other	1	591	2	Male	97	3	1	Laboratory Technician	3	Married	2093	9260	4	Y	No	17	3	4	80	1	8	4	3	2	2	2	3
36	No	Non-Travel	635	Sales	10	4	Medical	1	592	2	Male	32	3	3	Sales Executive	4	Single	9980	15318	1	Y	No	14	3	4	80	0	10	3	2	10	3	9	12
55	No	Travel_Rarely	1117	Sales	18	5	Life Sciences	1	597	1	Female	83	3	4	Manager	2	Single	16835	9873	3	Y	No	23	4	4	80	0	37	2	3	10	9	7	2
41	No	Non-Travel	267	Sales	10	2	Life Sciences	1	599	4	Male	56	3	2	Sales Executive	4	Single	6230	13430	7	Y	No	14	3	4	80	0	16	3	3	14	3	1	4
42	No	Travel_Rarely	319	Research & Development	24	3	Medical	1	605	4	Male	56	3	3	Manufacturing Director	1	Married	7406	6950	1	Y	Yes	21	4	4	80	1	10	5	2	10	9	5	7
18	Yes	Travel_Frequently	1306	Sales	5	3	Marketing	1	614	2	Male	69	3	1	Sales Representative	2	Single	1878	8059	1	Y	Yes	14	3	4	80	0	0	3	3	0	0	0	11
35	No	Travel_Rarely	195	Sales	1	3	Medical	1	620	1	Female	80	3	2	Sales Executive	3	Single	4859	6698	1	Y	No	16	3	4	80	0	5	3	3	5	4	0	7
34	No	Travel_Rarely	258	Sales	21	4	Life Sciences	1	621	4	Male	74	4	2	Sales Executive	4	Single	5337	19921	1	Y	No	12	3	4	80	0	10	3	3	10	7	5	9
37	No	Travel_Rarely	799	Research & Development	1	3	Technical Degree	1	623	2	Female	59	3	3	Manufacturing Director	4	Single	7491	23848	4	Y	No	17	3	4	80	0	12	3	4	6	5	1	9
46	No	Travel_Frequently	1034	Research & Development	18	1	Medical	1	624	1	Female	86	3	3	Healthcare Representative	3	Married	10527	8984	5	Y	No	11	3	4	80	0	28	3	2	2	2	1	4
37	No	Non-Travel	142	Sales	9	4	Medical	1	626	1	Male	69	3	3	Sales Executive	2	Divorced	8834	24666	1	Y	No	13	3	4	80	1	9	6	3	9	5	7	6
32	Yes	Non-Travel	1474	Sales	11	4	Other	1	631	4	Male	60	4	2	Sales Executive	3	Married	4707	23914	8	Y	No	12	3	4	80	0	6	2	3	4	2	1	2
26	No	Travel_Rarely	703	Sales	28	2	Marketing	1	641	1	Male	66	3	2	Sales Executive	2	Married	6272	7428	1	Y	No	20	4	4	80	2	6	5	4	5	3	1	2
24	No	Travel_Rarely	823	Research & Development	17	2	Other	1	643	4	Male	94	2	1	Laboratory Technician	2	Married	2127	9100	1	Y	No	21	4	4	80	1	1	2	3	1	0	0	3
24	Yes	Travel_Frequently	1287	Research & Development	7	3	Life Sciences	1	647	1	Female	55	3	1	Laboratory Technician	3	Married	2886	14168	1	Y	Yes	16	3	4	80	1	6	4	3	6	3	1	2
34	No	Travel_Rarely	254	Research & Development	1	2	Life Sciences	1	649	2	Male	83	2	1	Research Scientist	4	Married	3622	22794	1	Y	Yes	13	3	4	80	1	6	3	3	6	5	1	0
35	No	Travel_Rarely	538	Research & Development	25	2	Other	1	652	1	Male	54	2	2	Laboratory Technician	4	Single	3681	14004	4	Y	No	14	3	4	80	0	9	3	3	3	2	0	2
31	No	Travel_Rarely	525	Sales	6	4	Medical	1	653	1	Male	66	4	2	Sales Executive	4	Divorced	5460	6219	4	Y	No	22	4	4	80	2	13	4	4	7	7	5	2
20	No	Travel_Rarely	959	Research & Development	1	3	Life Sciences	1	657	4	Female	83	2	1	Research Scientist	2	Single	2836	11757	1	Y	No	13	3	4	80	0	1	0	4	1	0	0	2
38	No	Travel_Rarely	362	Research & Development	1	1	Life Sciences	1	662	3	Female	43	3	1	Research Scientist	1	Single	2619	14561	3	Y	No	17	3	4	80	0	8	3	2	0	0	0	2
34	No	Travel_Rarely	204	Sales	14	3	Technical Degree	1	666	3	Female	31	3	1	Sales Representative	3	Divorced	2579	2912	1	Y	Yes	18	3	4	80	2	8	3	3	8	2	0	2
22	No	Travel_Rarely	604	Research & Development	6	1	Medical	1	675	1	Male	69	3	1	Research Scientist	3	Married	2773	12145	0	Y	No	20	4	4	80	0	3	3	3	2	2	2	2
33	No	Travel_Rarely	1216	Sales	8	4	Marketing	1	677	3	Male	39	3	2	Sales Executive	3	Divorced	7104	20431	0	Y	No	12	3	4	80	0	6	3	3	5	0	1	0
32	No	Travel_Rarely	646	Research & Development	9	4	Life Sciences	1	679	1	Female	92	3	2	Research Scientist	4	Married	6322	18089	1	Y	Yes	12	3	4	80	1	6	2	2	6	4	0	2
53	No	Travel_Rarely	238	Sales	1	1	Medical	1	682	4	Female	34	3	2	Sales Executive	1	Single	8381	7507	7	Y	No	20	4	4	80	0	18	2	4	14	7	8	7
34	No	Travel_Rarely	1397	Research & Development	1	5	Life Sciences	1	683	2	Male	42	3	1	Research Scientist	4	Married	2691	7660	1	Y	No	12	3	4	80	1	10	4	2	10	9	8	0
45	Yes	Travel_Frequently	306	Sales	26	4	Life Sciences	1	684	1	Female	100	3	2	Sales Executive	1	Married	4286	5630	2	Y	No	14	3	4	80	2	5	4	3	1	1	0	7
27	No	Travel_Rarely	1115	Research & Development	3	4	Medical	1	700	1	Male	54	2	1	Research Scientist	4	Single	2045	15174	0	Y	No	13	3	4	80	0	5	0	3	4	2	1	2
20	Yes	Travel_Rarely	1362	Research & Development	10	1	Medical	1	701	4	Male	32	3	1	Research Scientist	3	Single	1009	26999	1	Y	Yes	11	3	4	80	0	1	5	3	1	0	1	13
29	No	Travel_Frequently	806	Research & Development	1	4	Life Sciences	1	710	2	Male	76	1	1	Research Scientist	4	Divorced	2720	18959	1	Y	No	18	3	4	80	1	10	5	3	10	7	2	0
48	No	Travel_Rarely	817	Sales	2	1	Marketing	1	712	2	Male	56	4	2	Sales Executive	2	Married	8120	18597	3	Y	No	12	3	4	80	0	12	3	3	2	2	2	13
32	No	Travel_Rarely	929	Sales	10	3	Marketing	1	722	4	Male	55	3	2	Sales Executive	4	Single	5396	21703	1	Y	No	12	3	4	80	0	10	2	2	10	7	0	3
27	No	Travel_Rarely	608	Research & Development	1	2	Life Sciences	1	725	3	Female	68	3	3	Manufacturing Director	1	Married	7412	6009	1	Y	No	11	3	4	80	0	9	3	3	9	7	0	7
32	No	Travel_Rarely	1018	Research & Development	3	2	Life Sciences	1	727	3	Female	39	3	3	Research Director	4	Single	11159	19373	3	Y	No	15	3	4	80	0	10	6	3	7	7	7	2
47	No	Travel_Rarely	703	Sales	14	4	Marketing	1	728	4	Male	42	3	2	Sales Executive	1	Single	4960	11825	2	Y	No	12	3	4	80	0	20	2	3	7	7	1	7
60	No	Travel_Rarely	1179	Sales	16	4	Marketing	1	732	1	Male	84	3	2	Sales Executive	1	Single	5405	11924	8	Y	No	14	3	4	80	0	10	1	3	2	2	2	4
50	No	Travel_Rarely	316	Sales	8	4	Marketing	1	738	4	Male	54	3	1	Sales Representative	2	Married	3875	9983	7	Y	No	15	3	4	80	1	4	2	3	2	2	2	8
28	Yes	Travel_Rarely	654	Research & Development	1	2	Life Sciences	1	741	1	Female	67	1	1	Research Scientist	2	Single	2216	3872	7	Y	Yes	13	3	4	80	0	10	4	3	7	7	3	4
38	No	Travel_Rarely	168	Research & Development	1	3	Life Sciences	1	743	3	Female	81	3	3	Manufacturing Director	3	Single	7861	15397	4	Y	Yes	14	3	4	80	0	10	4	4	1	0	0	7
47	No	Travel_Frequently	217	Sales	3	3	Medical	1	746	4	Female	49	3	4	Sales Executive	3	Divorced	13770	10225	9	Y	Yes	12	3	4	80	2	28	2	2	22	2	11	2
30	No	Travel_Rarely	501	Sales	27	5	Marketing	1	747	3	Male	99	3	2	Sales Executive	4	Divorced	5304	25275	7	Y	No	23	4	4	80	1	10	2	2	8	7	7	7
42	Yes	Travel_Frequently	933	Research & Development	19	3	Medical	1	752	3	Male	57	4	1	Research Scientist	3	Divorced	2759	20366	6	Y	Yes	12	3	4	80	0	7	2	3	2	2	2	4
34	No	Travel_Rarely	970	Research & Development	8	2	Medical	1	757	2	Female	96	3	2	Healthcare Representative	3	Single	6142	7360	3	Y	No	11	3	4	80	0	10	2	3	5	1	4	0
23	No	Travel_Rarely	650	Research & Development	9	1	Medical	1	758	2	Male	37	3	1	Laboratory Technician	1	Married	2500	4344	1	Y	No	14	3	4	80	1	5	2	4	4	3	0	10
40	No	Travel_Rarely	804	Research & Development	2	1	Medical	1	763	4	Female	86	2	1	Research Scientist	4	Single	2342	22929	0	Y	Yes	20	4	4	80	0	5	2	2	4	2	2	2
29	No	Travel_Rarely	1090	Sales	10	3	Marketing	1	766	4	Male	83	3	1	Sales Representative	2	Divorced	2297	17967	1	Y	No	14	3	4	80	2	2	2	3	2	2	2	6
53	No	Travel_Rarely	346	Research & Development	6	3	Life Sciences	1	769	4	Male	86	3	2	Laboratory Technician	4	Single	2450	10919	2	Y	No	17	3	4	80	0	19	4	3	2	2	2	3
32	No	Travel_Frequently	430	Research & Development	24	4	Life Sciences	1	772	1	Male	80	3	2	Laboratory Technician	4	Married	5309	21146	1	Y	No	15	3	4	80	2	10	2	3	10	8	4	3
23	No	Travel_Rarely	310	Research & Development	10	1	Medical	1	784	1	Male	79	4	1	Research Scientist	3	Single	3505	19630	1	Y	No	18	3	4	80	0	2	3	3	2	2	0	2
47	Yes	Travel_Frequently	719	Sales	27	2	Life Sciences	1	785	2	Female	77	4	2	Sales Executive	3	Single	6397	10339	4	Y	Yes	12	3	4	80	0	8	2	3	5	4	1	0
55	Yes	Travel_Rarely	725	Research & Development	2	3	Medical	1	787	4	Male	78	3	5	Manager	1	Married	19859	21199	5	Y	Yes	13	3	4	80	1	24	2	3	5	2	1	2
38	No	Travel_Frequently	240	Research & Development	2	4	Life Sciences	1	803	1	Female	75	4	2	Manufacturing Director	1	Single	5980	26085	6	Y	Yes	12	3	4	80	0	17	2	3	15	7	4	9
40	No	Travel_Frequently	791	Research & Development	2	2	Medical	1	807	3	Female	38	4	2	Healthcare Representative	2	Married	4244	9931	1	Y	No	24	4	4	80	1	8	2	3	8	7	3	7
50	No	Travel_Rarely	691	Research & Development	2	3	Medical	1	815	3	Male	64	3	4	Research Director	3	Married	17639	6881	5	Y	No	16	3	4	80	0	30	3	3	4	3	0	8
29	Yes	Travel_Rarely	805	Research & Development	1	2	Life Sciences	1	816	2	Female	36	2	1	Laboratory Technician	1	Married	2319	6689	1	Y	Yes	11	3	4	80	1	1	1	3	1	0	0	0
33	No	Travel_Rarely	213	Research & Development	7	3	Medical	1	817	3	Male	49	3	3	Research Director	3	Married	11691	25995	0	Y	No	11	3	4	80	0	14	3	4	13	9	3	3
58	Yes	Travel_Rarely	286	Research & Development	2	4	Life Sciences	1	825	4	Male	31	3	5	Research Director	2	Single	19246	25761	7	Y	Yes	12	3	4	80	0	40	2	3	31	15	13	2
42	No	Travel_Rarely	932	Research & Development	1	2	Life Sciences	1	827	4	Female	43	2	2	Manufacturing Director	4	Married	6062	4051	9	Y	Yes	13	3	4	80	1	8	4	3	4	3	0	0
28	Yes	Travel_Rarely	890	Research & Development	2	4	Medical	1	828	3	Male	46	3	1	Research Scientist	3	Single	4382	16374	6	Y	No	17	3	4	80	0	5	3	2	2	2	2	2
40	No	Travel_Frequently	720	Research & Development	16	4	Medical	1	832	1	Male	51	2	2	Laboratory Technician	3	Single	5094	11983	6	Y	No	14	3	4	80	0	10	6	3	1	0	0	4
45	No	Travel_Rarely	252	Research & Development	2	3	Life Sciences	1	834	2	Female	95	2	1	Research Scientist	3	Single	2274	6153	1	Y	No	14	3	4	80	0	1	3	3	1	0	0	8
42	No	Travel_Rarely	933	Research & Development	29	3	Life Sciences	1	836	2	Male	98	3	2	Manufacturing Director	2	Married	4434	11806	1	Y	No	13	3	4	80	1	10	3	2	9	8	7	2
44	No	Travel_Rarely	625	Research & Development	4	3	Medical	1	852	4	Male	50	3	2	Healthcare Representative	2	Single	5933	5197	9	Y	No	12	3	4	80	0	10	2	2	5	2	2	8
35	No	Travel_Rarely	1343	Research & Development	27	1	Medical	1	856	3	Female	53	2	1	Research Scientist	1	Single	2559	17852	1	Y	No	11	3	4	80	0	6	3	2	6	5	1	3
36	No	Travel_Rarely	928	Sales	1	2	Life Sciences	1	857	2	Male	56	3	2	Sales Executive	4	Married	6201	2823	1	Y	Yes	14	3	4	80	1	18	1	2	18	14	4	7
53	No	Travel_Rarely	661	Sales	7	2	Marketing	1	862	1	Female	78	2	3	Sales Executive	4	Married	10934	20715	7	Y	Yes	18	3	4	80	1	35	3	3	5	2	0	1
37	No	Travel_Rarely	342	Sales	16	4	Marketing	1	868	4	Male	66	2	2	Sales Executive	3	Divorced	6334	24558	4	Y	No	19	3	4	80	2	9	2	3	1	0	0	2
28	No	Travel_Rarely	1169	Human Resources	8	2	Medical	1	869	2	Male	63	2	1	Human Resources	4	Divorced	4936	23965	1	Y	No	13	3	4	80	1	6	6	3	5	1	0	2
42	No	Travel_Frequently	1271	Research & Development	2	1	Medical	1	875	2	Male	35	3	1	Research Scientist	4	Single	2515	9068	5	Y	Yes	14	3	4	80	0	8	2	3	2	1	2	4
25	No	Travel_Rarely	141	Sales	3	1	Other	1	879	3	Male	98	3	2	Sales Executive	1	Married	4194	14363	1	Y	Yes	18	3	4	80	0	5	3	3	5	3	0	2
24	No	Non-Travel	1269	Research & Development	4	1	Life Sciences	1	888	1	Male	46	2	1	Laboratory Technician	4	Married	3162	10778	0	Y	No	17	3	4	80	0	6	2	2	5	2	3	2
32	No	Travel_Frequently	379	Sales	5	2	Life Sciences	1	889	2	Male	48	3	2	Sales Executive	2	Married	6524	8891	1	Y	No	14	3	4	80	1	10	3	3	10	8	5	7
38	No	Travel_Rarely	395	Sales	9	3	Marketing	1	893	2	Male	98	2	1	Sales Representative	2	Married	2899	12102	0	Y	No	19	3	4	80	1	3	3	3	2	2	1	2
37	No	Non-Travel	1252	Sales	19	2	Medical	1	904	1	Male	32	3	3	Sales Executive	2	Single	7642	4814	1	Y	Yes	13	3	4	80	0	10	2	3	10	0	0	7
50	No	Non-Travel	881	Research & Development	2	4	Life Sciences	1	905	1	Male	98	3	4	Manager	1	Divorced	17924	4544	1	Y	No	11	3	4	80	1	31	3	3	31	6	14	4
44	No	Travel_Rarely	661	Research & Development	9	2	Life Sciences	1	913	2	Male	61	3	1	Research Scientist	1	Married	2559	7508	1	Y	Yes	13	3	4	80	0	8	0	3	8	7	7	0
58	Yes	Travel_Frequently	781	Research & Development	2	1	Life Sciences	1	918	4	Male	57	2	1	Laboratory Technician	4	Divorced	2380	13384	9	Y	Yes	14	3	4	80	1	3	3	2	1	0	0	5
20	Yes	Travel_Rarely	500	Sales	2	3	Medical	1	922	3	Female	49	2	1	Sales Representative	3	Single	2044	22052	1	Y	No	13	3	4	80	0	2	3	2	2	2	0	0
39	Yes	Travel_Rarely	1122	Research & Development	6	3	Medical	1	932	4	Male	70	3	1	Laboratory Technician	1	Married	2404	4303	7	Y	Yes	21	4	4	80	0	8	2	1	2	2	2	0
58	No	Travel_Rarely	1272	Research & Development	5	3	Technical Degree	1	940	3	Female	37	2	3	Healthcare Representative	2	Divorced	10552	9255	2	Y	Yes	13	3	4	80	1	24	3	3	6	0	0	7
35	No	Travel_Rarely	1137	Research & Development	21	1	Life Sciences	1	942	4	Female	51	3	2	Healthcare Representative	4	Married	4014	19170	1	Y	Yes	25	4	4	80	1	10	2	1	10	6	0	7
31	No	Non-Travel	1188	Sales	20	2	Marketing	1	947	4	Female	45	3	2	Sales Executive	3	Married	6932	24406	1	Y	No	13	3	4	80	1	9	2	2	9	8	0	0
40	No	Travel_Frequently	1469	Research & Development	9	4	Medical	1	964	4	Male	35	3	1	Research Scientist	2	Divorced	3617	25063	8	Y	Yes	14	3	4	80	1	3	2	3	1	1	0	0
39	No	Travel_Rarely	903	Sales	2	5	Life Sciences	1	985	1	Male	41	4	3	Sales Executive	3	Single	7880	2560	0	Y	No	18	3	4	80	0	9	3	3	8	7	0	4
40	Yes	Non-Travel	1479	Sales	24	3	Life Sciences	1	986	2	Female	100	4	4	Sales Executive	2	Single	13194	17071	4	Y	Yes	16	3	4	80	0	22	2	2	1	0	0	0
36	No	Non-Travel	1229	Sales	8	4	Technical Degree	1	990	1	Male	84	3	2	Sales Executive	4	Divorced	5079	25952	4	Y	No	13	3	4	80	2	12	3	3	7	7	0	7
33	No	Non-Travel	722	Sales	17	3	Life Sciences	1	992	4	Male	38	3	4	Manager	3	Single	17444	20489	1	Y	No	11	3	4	80	0	10	2	3	10	8	6	4
45	No	Travel_Rarely	974	Research & Development	1	4	Medical	1	996	4	Female	91	3	1	Laboratory Technician	4	Divorced	2270	11005	3	Y	No	14	3	4	80	2	8	2	3	5	3	0	7
50	No	Travel_Rarely	939	Research & Development	24	3	Life Sciences	1	1005	4	Male	95	3	4	Manufacturing Director	3	Married	13973	4161	3	Y	Yes	18	3	4	80	1	22	2	3	12	11	1	2
35	Yes	Travel_Rarely	622	Research & Development	14	4	Other	1	1010	3	Male	39	2	1	Laboratory Technician	2	Divorced	3743	10074	1	Y	Yes	24	4	4	80	1	5	2	1	4	2	0	8
18	No	Non-Travel	287	Research & Development	5	2	Life Sciences	1	1012	2	Male	73	3	1	Research Scientist	4	Single	1051	13493	1	Y	No	15	3	4	80	0	0	2	3	0	0	0	2
48	No	Travel_Rarely	277	Research & Development	6	3	Life Sciences	1	1022	1	Male	97	2	2	Healthcare Representative	3	Single	4240	13119	2	Y	No	13	3	4	80	0	19	0	3	2	2	2	0
55	No	Travel_Frequently	135	Research & Development	18	4	Medical	1	1034	3	Male	62	3	2	Healthcare Representative	2	Married	6385	12992	3	Y	Yes	14	3	4	80	2	17	3	3	8	7	6	4
26	Yes	Non-Travel	265	Sales	29	2	Medical	1	1037	2	Male	79	1	2	Sales Executive	1	Single	4969	21813	8	Y	No	18	3	4	80	0	7	6	3	2	2	2	0
52	Yes	Travel_Rarely	266	Sales	2	1	Marketing	1	1038	1	Female	57	1	5	Manager	4	Married	19845	25846	1	Y	No	15	3	4	80	1	33	3	3	32	14	6	7
33	No	Non-Travel	1038	Sales	8	1	Life Sciences	1	1044	2	Female	88	2	1	Sales Representative	4	Single	2342	21437	0	Y	No	19	3	4	80	0	3	2	2	2	2	2	2
34	No	Travel_Rarely	216	Sales	1	4	Marketing	1	1047	2	Male	75	4	2	Sales Executive	4	Divorced	9725	12278	0	Y	No	11	3	4	80	1	16	2	2	15	1	0	3
34	No	Travel_Rarely	1333	Sales	10	4	Life Sciences	1	1055	3	Female	87	3	1	Sales Representative	3	Married	2220	18410	1	Y	Yes	19	3	4	80	1	1	2	3	1	1	0	2
50	No	Travel_Rarely	1464	Research & Development	2	4	Medical	1	1061	2	Male	62	3	5	Research Director	3	Married	19237	12853	2	Y	Yes	11	3	4	80	1	29	2	2	8	1	7	7
46	No	Travel_Rarely	430	Research & Development	1	4	Medical	1	1069	4	Male	40	3	5	Research Director	4	Divorced	19627	21445	9	Y	No	17	3	4	80	2	23	0	3	2	2	2	3
40	No	Travel_Rarely	1492	Research & Development	20	4	Technical Degree	1	1092	1	Male	61	3	3	Healthcare Representative	4	Married	10322	26542	4	Y	No	20	4	4	80	1	14	6	3	11	10	11	7
27	No	Non-Travel	1277	Research & Development	8	5	Life Sciences	1	1094	1	Male	87	1	1	Laboratory Technician	3	Married	4621	5869	1	Y	No	19	3	4	80	3	3	4	3	3	2	1	7
28	No	Travel_Rarely	857	Research & Development	10	3	Other	1	1097	3	Female	59	3	2	Research Scientist	3	Single	3660	7909	3	Y	No	13	3	4	80	0	10	4	4	8	7	1	6
44	Yes	Travel_Rarely	1376	Human Resources	1	2	Medical	1	1098	2	Male	91	2	3	Human Resources	1	Married	10482	2326	9	Y	No	14	3	4	80	1	24	1	3	20	6	3	3
28	No	Travel_Rarely	895	Research & Development	15	2	Life Sciences	1	1102	1	Male	50	3	1	Laboratory Technician	3	Divorced	2207	22482	1	Y	No	16	3	4	80	1	4	5	2	4	2	2	2
42	No	Travel_Rarely	469	Research & Development	2	2	Medical	1	1109	4	Male	35	3	4	Manager	1	Married	17665	14399	0	Y	No	17	3	4	80	1	23	3	3	22	6	13	2
50	Yes	Travel_Frequently	959	Sales	1	4	Other	1	1113	4	Male	81	3	2	Sales Executive	3	Single	4728	17251	3	Y	Yes	14	3	4	80	0	5	4	3	0	0	0	2
34	No	Non-Travel	697	Research & Development	3	4	Life Sciences	1	1115	3	Male	40	2	1	Research Scientist	4	Married	2979	22478	3	Y	No	17	3	4	80	3	6	2	3	0	0	0	0
45	No	Non-Travel	1050	Sales	9	4	Life Sciences	1	1117	2	Female	65	2	2	Sales Executive	3	Married	5593	17970	1	Y	No	13	3	4	80	1	15	2	3	15	10	4	7
52	No	Travel_Rarely	994	Research & Development	7	4	Life Sciences	1	1118	2	Male	87	3	3	Healthcare Representative	2	Single	10445	15322	7	Y	No	19	3	4	80	0	18	4	3	8	6	4	8
46	No	Travel_Rarely	406	Sales	3	1	Marketing	1	1124	1	Male	52	3	4	Manager	3	Married	17465	15596	3	Y	No	12	3	4	80	1	23	3	3	12	9	4	7
39	Yes	Travel_Frequently	203	Research & Development	2	3	Life Sciences	1	1127	1	Male	84	3	4	Healthcare Representative	4	Divorced	12169	13547	7	Y	No	11	3	4	80	3	21	4	3	18	7	11	8
35	No	Travel_Frequently	1182	Sales	11	2	Marketing	1	1137	4	Male	54	3	2	Sales Executive	4	Divorced	4968	18500	1	Y	No	11	3	4	80	1	5	3	3	5	2	0	2
34	No	Travel_Frequently	1003	Research & Development	2	2	Life Sciences	1	1140	4	Male	95	3	2	Manufacturing Director	3	Single	4033	15834	2	Y	No	11	3	4	80	0	5	3	2	3	2	0	2
29	No	Travel_Frequently	490	Research & Development	10	3	Life Sciences	1	1143	4	Female	61	3	1	Research Scientist	2	Divorced	3291	17940	0	Y	No	14	3	4	80	2	8	2	2	7	5	1	2
38	No	Travel_Rarely	433	Human Resources	1	3	Human Resources	1	1152	3	Male	37	4	1	Human Resources	3	Married	2844	6004	1	Y	No	13	3	4	80	1	7	2	4	7	6	5	5
28	No	Travel_Frequently	773	Research & Development	6	3	Life Sciences	1	1154	3	Male	39	2	1	Research Scientist	3	Divorced	2703	22088	1	Y	Yes	14	3	4	80	1	3	2	3	3	1	0	2
18	Yes	Non-Travel	247	Research & Development	8	1	Medical	1	1156	3	Male	80	3	1	Laboratory Technician	3	Single	1904	13556	1	Y	No	12	3	4	80	0	0	0	3	0	0	0	4
42	No	Travel_Rarely	647	Sales	4	4	Marketing	1	1171	2	Male	45	3	2	Sales Executive	1	Single	5155	2253	7	Y	No	13	3	4	80	0	9	3	4	6	4	1	7
24	No	Travel_Rarely	477	Research & Development	24	3	Medical	1	1173	4	Male	49	3	1	Laboratory Technician	2	Single	3597	6409	8	Y	No	22	4	4	80	0	6	2	3	4	3	1	3
28	Yes	Travel_Rarely	1485	Research & Development	12	1	Life Sciences	1	1175	3	Female	79	3	1	Laboratory Technician	4	Married	2515	22955	1	Y	Yes	11	3	4	80	0	1	4	2	1	1	0	8
40	No	Travel_Frequently	902	Research & Development	26	2	Medical	1	1180	3	Female	92	2	2	Research Scientist	4	Married	4422	21203	3	Y	Yes	13	3	4	80	1	16	3	1	1	1	0	14
56	No	Travel_Rarely	718	Research & Development	4	4	Technical Degree	1	1191	4	Female	92	3	5	Manager	1	Divorced	19943	18575	4	Y	No	13	3	4	80	1	28	2	3	5	2	4	3
44	No	Non-Travel	111	Research & Development	17	3	Life Sciences	1	1206	4	Male	74	1	1	Research Scientist	3	Single	2290	4279	2	Y	No	13	3	4	80	0	6	3	3	0	0	0	10
33	No	Travel_Rarely	147	Human Resources	2	3	Human Resources	1	1207	2	Male	99	3	1	Human Resources	3	Married	3600	8429	1	Y	No	13	3	4	80	1	5	2	3	5	4	1	7
40	No	Travel_Frequently	1184	Sales	2	4	Medical	1	1212	2	Male	62	3	2	Sales Executive	2	Married	4327	25440	5	Y	No	12	3	4	80	3	5	2	3	0	0	0	7
35	No	Travel_Rarely	1361	Sales	17	4	Life Sciences	1	1218	3	Male	94	3	2	Sales Executive	1	Married	8966	21026	3	Y	Yes	15	3	4	80	3	15	2	3	7	7	1	2
20	No	Travel_Rarely	654	Sales	21	3	Marketing	1	1226	3	Male	43	4	1	Sales Representative	4	Single	2678	5050	1	Y	No	17	3	4	80	0	2	2	3	2	1	2	2
32	No	Travel_Frequently	1316	Research & Development	2	2	Life Sciences	1	1235	4	Female	38	3	2	Research Scientist	3	Single	4998	2338	4	Y	Yes	14	3	4	80	0	10	2	3	8	7	0	3
27	No	Travel_Rarely	1103	Research & Development	14	3	Life Sciences	1	1244	1	Male	42	3	1	Research Scientist	1	Married	2235	14377	1	Y	Yes	14	3	4	80	2	9	3	2	9	7	6	2
44	No	Travel_Rarely	1117	Research & Development	2	1	Life Sciences	1	1246	1	Female	72	4	1	Research Scientist	4	Married	2011	19982	1	Y	No	13	3	4	80	1	10	5	3	10	5	7	2
31	No	Travel_Rarely	1332	Research & Development	11	2	Medical	1	1251	3	Male	80	3	2	Healthcare Representative	1	Married	6833	17089	1	Y	Yes	12	3	4	80	0	6	2	2	6	5	0	0
59	No	Travel_Rarely	326	Sales	3	3	Life Sciences	1	1254	3	Female	48	2	2	Sales Executive	4	Single	5171	16490	5	Y	No	17	3	4	80	0	13	2	3	6	1	0	0
34	No	Travel_Rarely	1320	Research & Development	20	3	Technical Degree	1	1265	3	Female	89	4	1	Research Scientist	3	Married	2585	21643	0	Y	No	17	3	4	80	0	2	5	2	1	0	0	0
33	No	Travel_Rarely	536	Sales	10	5	Marketing	1	1268	4	Male	82	4	3	Sales Executive	3	Divorced	8380	21708	0	Y	Yes	14	3	4	80	2	10	3	3	9	8	0	7
19	No	Travel_Rarely	265	Research & Development	25	3	Life Sciences	1	1269	2	Female	57	4	1	Research Scientist	4	Single	2994	21221	1	Y	Yes	12	3	4	80	0	1	2	3	1	0	0	0
23	No	Travel_Rarely	373	Research & Development	1	2	Life Sciences	1	1270	4	Male	47	3	1	Research Scientist	3	Married	1223	16901	1	Y	No	22	4	4	80	1	1	2	3	1	0	0	7
25	Yes	Travel_Frequently	599	Sales	24	1	Life Sciences	1	1273	3	Male	73	1	1	Sales Representative	4	Single	1118	8040	1	Y	Yes	14	3	4	80	0	1	4	3	1	0	1	2
55	No	Non-Travel	177	Research & Development	8	1	Medical	1	1278	4	Male	37	2	4	Healthcare Representative	2	Divorced	13577	25592	1	Y	Yes	15	3	4	80	1	34	3	3	33	9	15	10
34	No	Travel_Rarely	131	Sales	2	3	Marketing	1	1281	3	Female	86	3	2	Sales Executive	1	Single	4538	6039	0	Y	Yes	5	3	4	80	0	4	3	3	3	2	0	0
59	No	Travel_Rarely	1429	Research & Development	18	4	Medical	1	1283	4	Male	67	3	3	Manufacturing Director	4	Single	10512	20002	6	Y	No	12	3	4	80	0	25	6	2	9	7	5	3
44	No	Travel_Rarely	1199	Research & Development	4	2	Life Sciences	1	1288	3	Male	92	4	5	Manager	1	Divorced	19190	17477	1	Y	No	14	3	4	80	2	26	4	2	25	9	14	0
34	No	Travel_Frequently	648	Human Resources	11	3	Life Sciences	1	1289	3	Male	56	2	2	Human Resources	2	Married	4490	21833	4	Y	No	11	3	4	80	2	14	5	4	10	9	1	7
35	No	Travel_Rarely	735	Research & Development	6	1	Life Sciences	1	1291	3	Male	66	3	1	Research Scientist	3	Married	3506	6020	0	Y	Yes	14	3	4	80	0	4	3	3	3	2	2	2
42	No	Travel_Rarely	603	Research & Development	7	4	Medical	1	1292	2	Female	78	4	2	Research Scientist	2	Married	2372	5628	6	Y	Yes	16	3	4	80	0	18	2	3	1	0	0	6
43	No	Travel_Rarely	531	Sales	4	4	Marketing	1	1293	4	Female	56	2	3	Sales Executive	4	Single	10231	20364	3	Y	No	14	3	4	80	0	23	3	4	21	7	15	0
36	No	Travel_Rarely	429	Research & Development	2	4	Life Sciences	1	1294	3	Female	53	3	2	Manufacturing Director	2	Single	5410	2323	9	Y	Yes	11	3	4	80	0	18	2	3	16	14	5	2
44	Yes	Travel_Rarely	621	Research & Development	15	3	Medical	1	1295	1	Female	73	3	3	Healthcare Representative	4	Married	7978	14075	1	Y	No	11	3	4	80	1	10	2	3	10	7	0	8
25	No	Travel_Rarely	266	Research & Development	1	3	Medical	1	1303	4	Female	40	3	1	Research Scientist	2	Single	2096	18830	1	Y	No	18	3	4	80	0	2	3	2	2	2	2	8
39	No	Travel_Rarely	412	Research & Development	13	4	Medical	1	1307	3	Female	94	2	4	Manager	2	Divorced	17123	17334	6	Y	Yes	13	3	4	80	2	21	4	3	19	9	15	0
58	No	Travel_Rarely	848	Research & Development	23	4	Life Sciences	1	1308	1	Male	88	3	1	Research Scientist	3	Divorced	2372	26076	1	Y	No	12	3	4	80	2	2	3	3	2	2	2	14
30	No	Travel_Rarely	634	Research & Development	17	4	Medical	1	1321	2	Female	95	3	3	Manager	1	Married	11916	25927	1	Y	Yes	23	4	4	80	2	9	2	3	9	1	0	9
42	No	Non-Travel	495	Research & Development	2	1	Life Sciences	1	1334	3	Male	37	3	4	Manager	3	Married	17861	26582	0	Y	Yes	13	3	4	80	0	21	3	2	20	8	2	0
55	No	Travel_Rarely	282	Research & Development	2	2	Medical	1	1336	4	Female	58	1	5	Manager	3	Married	19187	6992	4	Y	No	14	3	4	80	1	23	5	3	19	9	9	7
34	No	Travel_Rarely	943	Research & Development	9	3	Life Sciences	1	1344	4	Male	86	3	3	Healthcare Representative	4	Divorced	8500	5494	0	Y	No	11	3	4	80	1	10	0	2	9	7	1	3
41	No	Travel_Frequently	1018	Sales	1	3	Marketing	1	1349	3	Female	66	3	2	Sales Executive	1	Divorced	4103	4297	0	Y	No	17	3	4	80	1	10	2	3	9	3	1	2
38	No	Travel_Rarely	1009	Sales	2	2	Life Sciences	1	1355	2	Female	31	3	2	Sales Executive	1	Divorced	6893	19461	3	Y	No	15	3	4	80	1	11	3	3	7	7	1	4
34	No	Travel_Rarely	507	Sales	15	2	Medical	1	1356	3	Female	66	3	2	Sales Executive	1	Single	6125	23553	1	Y	No	12	3	4	80	0	10	6	4	10	8	9	0
58	Yes	Travel_Rarely	601	Research & Development	7	4	Medical	1	1360	3	Female	53	2	3	Manufacturing Director	1	Married	10008	12023	7	Y	Yes	14	3	4	80	0	31	0	2	10	9	5	0
36	No	Travel_Frequently	607	Sales	7	3	Marketing	1	1362	1	Female	83	4	2	Sales Executive	1	Married	4639	2261	2	Y	No	16	3	4	80	1	17	2	2	15	7	6	0
38	No	Travel_Frequently	693	Research & Development	7	3	Life Sciences	1	1382	4	Male	57	4	1	Research Scientist	3	Divorced	2610	15748	1	Y	No	11	3	4	80	3	4	2	3	4	2	0	7
34	No	Travel_Rarely	404	Research & Development	2	4	Technical Degree	1	1383	3	Female	98	3	2	Healthcare Representative	4	Single	6687	6163	1	Y	No	11	3	4	80	0	14	2	4	14	11	4	2
31	Yes	Travel_Rarely	330	Research & Development	22	4	Medical	1	1389	4	Male	98	3	2	Manufacturing Director	3	Married	6179	21057	1	Y	Yes	15	3	4	80	2	10	3	2	10	2	6	0
39	No	Travel_Rarely	1498	Sales	21	4	Life Sciences	1	1390	1	Male	44	2	2	Sales Executive	4	Married	6120	3567	3	Y	Yes	12	3	4	80	2	8	2	4	5	4	1	2
37	No	Travel_Rarely	1439	Research & Development	4	1	Life Sciences	1	1394	3	Male	54	3	1	Research Scientist	3	Married	2996	5182	7	Y	Yes	15	3	4	80	0	8	2	3	6	4	1	4
27	No	Travel_Rarely	205	Sales	10	3	Marketing	1	1403	4	Female	98	2	2	Sales Executive	4	Married	5769	7100	1	Y	Yes	11	3	4	80	0	6	3	3	6	2	4	2
27	Yes	Travel_Rarely	135	Research & Development	17	4	Life Sciences	1	1405	4	Female	51	3	1	Research Scientist	3	Single	2394	25681	1	Y	Yes	13	3	4	80	0	8	2	3	8	2	7	8
26	No	Travel_Rarely	683	Research & Development	2	1	Medical	1	1407	1	Male	36	2	1	Research Scientist	4	Single	3904	4050	0	Y	No	12	3	4	80	0	5	2	3	4	3	1	8
26	No	Travel_Rarely	652	Research & Development	7	3	Other	1	1417	3	Male	100	4	1	Laboratory Technician	1	Single	3578	23577	0	Y	No	12	3	4	80	0	8	2	3	7	7	0	16
54	No	Travel_Rarely	971	Research & Development	1	3	Medical	1	1422	4	Female	54	3	4	Research Director	4	Single	17328	5652	6	Y	No	19	3	4	80	0	29	3	2	20	7	12	0
55	No	Travel_Rarely	1136	Research & Development	1	4	Medical	1	1424	2	Male	81	4	4	Research Director	4	Divorced	14732	12414	2	Y	No	13	3	4	80	2	31	4	4	7	7	0	7
36	No	Travel_Rarely	1174	Sales	3	4	Marketing	1	1425	1	Female	99	3	2	Sales Executive	2	Single	9278	20763	3	Y	Yes	16	3	4	80	0	15	3	3	5	4	0	7
56	No	Travel_Rarely	1255	Research & Development	1	2	Life Sciences	1	1441	1	Female	90	3	1	Research Scientist	1	Married	2066	10494	2	Y	No	22	4	4	80	1	5	3	4	3	2	1	2
31	No	Travel_Rarely	1398	Human Resources	8	2	Medical	1	1461	4	Female	96	4	1	Human Resources	2	Single	2109	24609	9	Y	No	18	3	4	80	0	8	3	3	3	2	0	0
45	No	Travel_Rarely	1448	Research & Development	29	3	Technical Degree	1	1465	2	Male	55	3	3	Manufacturing Director	4	Married	9380	14720	4	Y	Yes	18	3	4	80	2	10	4	4	3	1	1	0
34	Yes	Travel_Rarely	1107	Human Resources	9	4	Technical Degree	1	1467	1	Female	52	3	1	Human Resources	3	Married	2742	3072	1	Y	No	15	3	4	80	0	2	0	3	2	2	2	3
28	No	Travel_Rarely	866	Sales	5	3	Medical	1	1469	4	Male	84	3	2	Sales Executive	1	Single	8463	23490	0	Y	No	18	3	4	80	0	6	4	3	5	4	1	4
44	No	Non-Travel	981	Research & Development	5	3	Life Sciences	1	1471	3	Male	90	2	1	Laboratory Technician	3	Single	3162	7973	3	Y	No	14	3	4	80	0	7	5	3	5	2	0	7
34	No	Travel_Rarely	1326	Sales	3	3	Other	1	1478	4	Male	81	1	2	Sales Executive	1	Single	4759	15891	3	Y	No	18	3	4	80	0	15	2	3	13	9	3	4
34	No	Travel_Frequently	829	Research & Development	15	3	Medical	1	1485	2	Male	71	3	4	Research Director	1	Divorced	17007	11929	7	Y	No	14	3	4	80	2	16	3	2	14	8	6	1
28	Yes	Travel_Frequently	1496	Sales	1	3	Technical Degree	1	1486	1	Male	92	3	1	Sales Representative	3	Married	2909	15747	3	Y	No	15	3	4	80	1	5	3	4	3	2	1	2
33	No	Travel_Rarely	1099	Research & Development	4	4	Medical	1	1502	1	Female	82	2	1	Laboratory Technician	2	Married	3838	8192	8	Y	No	11	3	4	80	0	8	5	3	5	4	0	7
28	No	Travel_Rarely	1423	Research & Development	1	3	Life Sciences	1	1506	1	Male	72	2	1	Research Scientist	3	Divorced	1563	12530	1	Y	No	14	3	4	80	1	1	2	1	1	0	0	3
28	No	Travel_Frequently	467	Sales	7	3	Life Sciences	1	1507	3	Male	55	3	2	Sales Executive	1	Single	4898	11827	0	Y	No	14	3	4	80	0	5	5	3	4	2	1	9
39	No	Travel_Rarely	1089	Research & Development	6	3	Life Sciences	1	1525	2	Female	32	3	3	Manufacturing Director	2	Single	8376	9150	4	Y	No	18	3	4	80	0	9	3	3	2	0	2	7
46	No	Travel_Rarely	228	Sales	3	3	Life Sciences	1	1527	3	Female	51	3	4	Manager	2	Married	16606	11380	8	Y	No	12	3	4	80	1	23	2	4	13	12	5	0
35	No	Travel_Rarely	1029	Research & Development	16	3	Life Sciences	1	1529	4	Female	91	2	3	Healthcare Representative	2	Single	8606	21195	1	Y	No	19	3	4	80	0	11	3	1	11	8	3	2
34	No	Travel_Rarely	971	Sales	1	3	Technical Degree	1	1535	4	Male	64	2	3	Sales Executive	3	Married	7083	12288	1	Y	Yes	14	3	4	80	0	10	3	3	10	9	8	2
50	No	Travel_Frequently	333	Research & Development	22	5	Medical	1	1539	3	Male	88	1	4	Research Director	4	Single	14411	24450	1	Y	Yes	13	3	4	80	0	32	2	3	32	6	13	11
33	No	Travel_Rarely	575	Research & Development	25	3	Life Sciences	1	1545	4	Male	44	2	2	Manufacturing Director	2	Single	4320	24152	1	Y	No	13	3	4	80	0	5	2	3	5	3	0	2
45	No	Travel_Rarely	950	Research & Development	28	3	Technical Degree	1	1546	4	Male	97	3	1	Research Scientist	4	Married	2132	4585	4	Y	No	20	4	4	80	1	8	3	3	5	4	0	7
40	No	Travel_Rarely	1342	Sales	9	2	Medical	1	1548	1	Male	47	3	2	Sales Executive	1	Married	5473	19345	0	Y	No	12	3	4	80	0	9	5	4	8	4	7	0
40	No	Travel_Rarely	898	Human Resources	6	2	Medical	1	1550	3	Male	38	3	4	Manager	4	Single	16437	17381	1	Y	Yes	21	4	4	80	0	21	2	3	21	7	7	9
36	No	Travel_Rarely	1157	Sales	2	4	Life Sciences	1	1556	3	Male	70	3	1	Sales Representative	4	Single	2644	17001	3	Y	Yes	21	4	4	80	0	7	3	2	3	2	1	7
33	No	Travel_Rarely	1242	Sales	8	4	Life Sciences	1	1560	1	Male	46	3	2	Sales Executive	1	Married	6392	10589	2	Y	No	13	3	4	80	1	8	6	1	2	2	2	0
30	Yes	Travel_Rarely	740	Sales	1	3	Life Sciences	1	1562	2	Male	64	2	2	Sales Executive	1	Married	9714	5323	1	Y	No	11	3	4	80	1	10	4	3	10	8	6	3
35	Yes	Travel_Rarely	104	Research & Development	2	3	Life Sciences	1	1569	1	Female	69	3	1	Laboratory Technician	1	Divorced	2074	26619	1	Y	Yes	12	3	4	80	1	1	2	3	1	0	0	3
48	No	Travel_Rarely	1108	Research & Development	15	4	Other	1	1576	3	Female	65	3	1	Research Scientist	1	Married	2367	16530	8	Y	No	12	3	4	80	1	10	3	2	8	2	7	3
38	No	Travel_Rarely	1245	Sales	14	3	Life Sciences	1	1582	3	Male	80	3	2	Sales Executive	2	Married	9924	12355	0	Y	No	11	3	4	80	1	10	3	3	9	8	7	0
29	No	Travel_Rarely	1370	Research & Development	3	1	Medical	1	1586	2	Male	87	3	1	Laboratory Technician	1	Single	4723	16213	1	Y	Yes	18	3	4	80	0	10	3	3	10	9	1	0
29	No	Travel_Frequently	995	Research & Development	2	1	Life Sciences	1	1590	1	Male	87	3	2	Healthcare Representative	4	Divorced	8853	24483	1	Y	No	19	3	4	80	1	6	0	4	6	4	1	4
23	No	Travel_Rarely	977	Research & Development	10	3	Technical Degree	1	1592	4	Male	45	4	1	Research Scientist	3	Married	2073	12826	2	Y	No	16	3	4	80	1	4	2	3	2	2	2	4
36	No	Travel_Frequently	1302	Research & Development	6	4	Life Sciences	1	1594	1	Male	80	4	2	Laboratory Technician	1	Married	5562	19711	3	Y	Yes	13	3	4	80	1	9	3	3	3	2	0	3
42	No	Travel_Rarely	1059	Research & Development	9	2	Other	1	1595	4	Male	93	2	5	Manager	4	Single	19613	26362	8	Y	No	22	4	4	80	0	24	2	3	1	0	0	2
35	No	Travel_Rarely	750	Research & Development	28	3	Life Sciences	1	1596	2	Male	46	4	2	Laboratory Technician	3	Married	3407	25348	1	Y	No	17	3	4	80	2	10	3	2	10	9	6	1
35	No	Travel_Rarely	1349	Research & Development	7	2	Life Sciences	1	1601	3	Male	63	2	1	Laboratory Technician	4	Married	2690	7713	1	Y	No	18	3	4	80	1	1	5	2	1	0	0	1
32	No	Travel_Rarely	634	Research & Development	5	4	Other	1	1607	2	Female	35	4	1	Research Scientist	4	Married	3312	18783	3	Y	No	17	3	4	80	2	6	3	3	3	2	0	6
44	No	Travel_Rarely	1313	Research & Development	7	3	Medical	1	1608	2	Female	31	3	5	Research Director	4	Divorced	19049	3549	0	Y	Yes	14	3	4	80	1	23	4	2	22	7	1	2
31	No	Travel_Frequently	715	Sales	2	4	Other	1	1613	4	Male	54	3	2	Sales Executive	1	Single	5332	21602	7	Y	No	13	3	4	80	0	10	3	3	5	2	0	2
49	No	Travel_Rarely	722	Research & Development	25	4	Life Sciences	1	1617	3	Female	84	3	1	Laboratory Technician	1	Married	3211	22102	1	Y	No	14	3	4	80	1	10	3	2	9	6	1	7
39	No	Travel_Rarely	1387	Research & Development	10	5	Medical	1	1618	2	Male	76	3	2	Manufacturing Director	1	Married	5377	3835	2	Y	No	13	3	4	80	3	10	3	3	7	7	7	3
35	No	Travel_Rarely	819	Research & Development	18	5	Life Sciences	1	1621	2	Male	48	4	2	Research Scientist	1	Married	5208	26312	1	Y	No	11	3	4	80	0	16	2	3	16	15	1	0
39	No	Travel_Rarely	170	Research & Development	3	2	Medical	1	1627	3	Male	76	2	2	Laboratory Technician	3	Divorced	3069	10302	0	Y	No	15	3	4	80	1	11	3	3	10	8	0	9
40	No	Travel_Rarely	884	Research & Development	15	3	Life Sciences	1	1628	1	Female	80	2	3	Manufacturing Director	3	Married	10435	25800	1	Y	No	13	3	4	80	2	18	2	3	18	15	14	7
35	No	Non-Travel	208	Research & Development	8	4	Life Sciences	1	1630	3	Female	52	3	2	Healthcare Representative	3	Married	4148	12250	1	Y	No	12	3	4	80	1	15	5	3	14	11	2	0
39	No	Travel_Frequently	711	Research & Development	4	3	Medical	1	1633	1	Female	81	3	2	Manufacturing Director	3	Single	5042	3140	0	Y	No	13	3	4	80	0	10	2	1	9	2	3	8
38	No	Travel_Rarely	397	Research & Development	2	2	Medical	1	1638	4	Female	54	2	3	Manufacturing Director	3	Married	7756	14199	3	Y	Yes	19	3	4	80	1	10	6	4	5	4	0	2
40	No	Travel_Rarely	448	Research & Development	16	3	Life Sciences	1	1641	3	Female	84	3	3	Manufacturing Director	4	Single	7945	19948	6	Y	Yes	15	3	4	80	0	18	2	2	4	2	3	3
35	Yes	Travel_Rarely	763	Sales	15	2	Medical	1	1645	1	Male	59	1	2	Sales Executive	4	Divorced	5440	22098	6	Y	Yes	14	3	4	80	2	7	2	2	2	2	2	8
38	No	Travel_Frequently	1189	Research & Development	1	3	Life Sciences	1	1668	4	Male	90	3	2	Research Scientist	4	Married	4735	9867	7	Y	No	15	3	4	80	2	19	4	4	13	11	2	9
41	No	Travel_Rarely	1206	Sales	23	2	Life Sciences	1	1678	4	Male	80	3	3	Sales Executive	3	Single	7082	11591	3	Y	Yes	16	3	4	80	0	21	2	3	2	0	0	2
38	No	Travel_Rarely	1495	Research & Development	4	2	Medical	1	1687	4	Female	87	3	1	Laboratory Technician	3	Married	3306	26176	7	Y	No	19	3	4	80	1	7	5	2	0	0	0	4
55	No	Travel_Rarely	1441	Research & Development	22	3	Technical Degree	1	1694	1	Male	94	2	1	Research Scientist	2	Divorced	3537	23737	5	Y	No	12	3	4	80	1	8	1	3	4	2	1	0
33	No	Travel_Rarely	267	Research & Development	21	3	Medical	1	1698	2	Male	79	4	1	Laboratory Technician	2	Married	2028	13637	1	Y	No	18	3	4	80	3	14	6	3	14	11	2	10
24	No	Travel_Rarely	581	Research & Development	9	3	Medical	1	1707	3	Male	62	4	1	Research Scientist	3	Married	4401	17616	1	Y	No	16	3	4	80	1	5	1	3	5	3	0	7
45	No	Non-Travel	1238	Research & Development	1	1	Life Sciences	1	1712	3	Male	74	2	3	Healthcare Representative	3	Married	10748	3395	3	Y	No	23	4	4	80	1	25	3	2	23	15	14	8
31	No	Travel_Rarely	741	Research & Development	2	4	Life Sciences	1	1721	2	Male	69	3	1	Laboratory Technician	3	Married	3477	18103	1	Y	No	14	3	4	80	1	6	2	4	5	2	0	4
46	No	Travel_Rarely	717	Research & Development	13	4	Life Sciences	1	1727	3	Male	34	3	2	Healthcare Representative	2	Single	5562	9697	6	Y	No	14	3	4	80	0	19	3	3	10	7	0	2
47	No	Non-Travel	543	Sales	2	4	Marketing	1	1731	3	Male	87	3	2	Sales Executive	2	Married	4978	3536	7	Y	No	11	3	4	80	1	4	3	1	1	0	0	4
31	No	Travel_Frequently	163	Research & Development	24	1	Technical Degree	1	1736	4	Female	30	3	2	Manufacturing Director	4	Single	5238	6670	2	Y	No	20	4	4	80	0	9	3	2	5	4	1	4
39	No	Non-Travel	792	Research & Development	1	3	Life Sciences	1	1737	4	Male	77	3	2	Laboratory Technician	4	Married	6472	8989	1	Y	Yes	15	3	4	80	1	9	2	3	9	8	5	10
30	No	Travel_Frequently	1312	Research & Development	2	4	Technical Degree	1	1745	4	Female	78	2	1	Research Scientist	1	Single	4968	26427	0	Y	No	16	3	4	80	0	10	2	3	9	7	0	2
24	No	Travel_Frequently	897	Human Resources	10	3	Medical	1	1746	1	Male	59	3	1	Human Resources	4	Married	2145	2097	0	Y	No	14	3	4	80	1	3	2	3	2	2	2	7
29	No	Travel_Frequently	461	Research & Development	1	3	Life Sciences	1	1753	4	Male	70	4	2	Healthcare Representative	3	Single	6294	23060	8	Y	Yes	12	3	4	80	0	10	5	4	3	2	0	2
33	No	Non-Travel	1283	Sales	2	3	Marketing	1	1756	4	Female	62	3	2	Sales Executive	2	Single	5147	10697	8	Y	No	15	3	4	80	0	13	2	2	11	7	1	11
43	Yes	Travel_Frequently	807	Research & Development	17	3	Technical Degree	1	1767	3	Male	38	2	1	Research Scientist	3	Married	2437	15587	9	Y	Yes	16	3	4	80	1	6	4	3	1	0	0	0
33	No	Non-Travel	775	Research & Development	4	3	Technical Degree	1	1771	4	Male	90	3	2	Research Scientist	2	Divorced	3055	6194	5	Y	No	15	3	4	80	2	11	2	2	9	8	1	8
53	No	Non-Travel	661	Research & Development	1	4	Medical	1	1775	1	Female	60	2	4	Manufacturing Director	3	Married	12965	22308	4	Y	Yes	20	4	4	80	3	27	2	2	3	2	0	2
51	No	Travel_Rarely	942	Research & Development	3	3	Technical Degree	1	1786	1	Female	53	3	3	Manager	3	Married	13116	22984	2	Y	No	11	3	4	80	0	15	2	3	2	2	2	7
36	No	Travel_Rarely	1383	Research & Development	10	3	Life Sciences	1	1790	4	Male	90	3	3	Healthcare Representative	1	Married	8321	25949	7	Y	Yes	13	3	4	80	1	15	1	3	12	8	5	2
35	Yes	Travel_Rarely	303	Sales	27	3	Life Sciences	1	1797	3	Male	84	3	2	Sales Executive	4	Single	5813	13492	1	Y	Yes	18	3	4	80	0	10	2	3	10	7	7	0
40	No	Travel_Rarely	616	Research & Development	2	2	Life Sciences	1	1802	3	Female	99	3	1	Laboratory Technician	1	Married	3377	25605	4	Y	No	17	3	4	80	1	7	5	2	4	3	0	12
38	No	Non-Travel	1336	Human Resources	2	3	Human Resources	1	1805	1	Male	100	3	1	Human Resources	2	Divorced	2592	7129	5	Y	No	13	3	4	80	3	13	3	3	11	10	3	2
39	No	Travel_Frequently	766	Sales	20	3	Life Sciences	1	1812	3	Male	83	3	2	Sales Executive	4	Divorced	4127	19188	2	Y	No	18	3	4	80	1	7	6	3	2	1	2	2
41	No	Travel_Rarely	796	Sales	4	1	Marketing	1	1815	3	Female	81	3	3	Sales Executive	3	Divorced	10447	26458	0	Y	Yes	13	3	4	80	1	23	3	4	22	14	13	8
46	Yes	Travel_Rarely	261	Research & Development	21	2	Medical	1	1821	4	Female	66	3	2	Healthcare Representative	2	Married	8926	10842	4	Y	No	22	4	4	80	1	13	2	4	9	7	3	1
40	No	Travel_Rarely	1194	Research & Development	1	3	Life Sciences	1	1822	3	Female	52	3	2	Healthcare Representative	4	Divorced	6513	9060	4	Y	No	17	3	4	80	1	12	3	3	5	3	0	1
58	No	Non-Travel	350	Sales	2	3	Medical	1	1824	2	Male	52	3	4	Manager	2	Divorced	16291	22577	4	Y	No	22	4	4	80	1	37	0	2	16	9	14	0
31	No	Travel_Frequently	1125	Sales	7	4	Marketing	1	1833	1	Female	68	3	3	Sales Executive	1	Married	9637	8277	2	Y	No	14	3	4	80	2	9	3	3	3	2	2	2
29	Yes	Travel_Rarely	350	Human Resources	13	3	Human Resources	1	1844	1	Male	56	2	1	Human Resources	1	Divorced	2335	3157	4	Y	Yes	15	3	4	80	3	4	3	3	2	2	2	7
36	No	Travel_Rarely	430	Research & Development	2	4	Other	1	1847	4	Female	73	3	2	Research Scientist	2	Married	6962	19573	4	Y	Yes	22	4	4	80	1	15	2	3	1	0	0	11
29	No	Travel_Rarely	726	Research & Development	29	1	Life Sciences	1	1859	4	Male	93	1	2	Healthcare Representative	3	Divorced	6384	21143	8	Y	No	17	3	4	80	2	11	3	3	7	0	1	7
42	No	Travel_Rarely	1142	Research & Development	8	3	Life Sciences	1	1860	4	Male	81	3	1	Laboratory Technician	3	Single	3968	13624	4	Y	No	13	3	4	80	0	8	3	3	0	0	0	8
46	No	Travel_Rarely	1319	Sales	3	3	Technical Degree	1	1863	1	Female	45	4	4	Sales Executive	1	Divorced	13225	7739	2	Y	No	12	3	4	80	1	25	5	3	19	17	2	4
27	No	Travel_Rarely	728	Sales	23	1	Medical	1	1864	2	Female	36	2	2	Sales Representative	3	Married	3540	7018	1	Y	No	21	4	4	80	1	9	5	3	9	8	5	0
29	No	Travel_Rarely	352	Human Resources	6	1	Medical	1	1865	4	Male	87	2	1	Human Resources	2	Married	2804	15434	1	Y	No	11	3	4	80	0	1	3	3	1	0	0	2
43	No	Travel_Rarely	823	Research & Development	6	3	Medical	1	1866	1	Female	81	2	5	Manager	3	Married	19392	22539	7	Y	No	13	3	4	80	0	21	2	3	16	12	6	2
48	No	Travel_Rarely	1224	Research & Development	10	3	Life Sciences	1	1867	4	Male	91	2	5	Research Director	2	Married	19665	13583	4	Y	No	12	3	4	80	0	29	3	3	22	10	12	3
27	No	Travel_Frequently	1131	Research & Development	15	3	Life Sciences	1	1870	4	Female	77	2	1	Research Scientist	1	Married	4774	23844	0	Y	No	19	3	4	80	1	8	2	2	7	6	7	0
28	No	Travel_Rarely	1172	Sales	3	3	Medical	1	1875	2	Female	78	3	1	Sales Representative	2	Married	2856	3692	1	Y	No	19	3	4	80	1	1	3	3	1	0	0	4
34	No	Travel_Rarely	1480	Sales	4	3	Life Sciences	1	1882	3	Male	64	3	3	Sales Executive	4	Married	9713	24444	2	Y	Yes	13	3	4	80	3	9	3	3	5	3	1	2
35	No	Travel_Rarely	219	Research & Development	16	2	Other	1	1886	4	Female	44	2	2	Manufacturing Director	2	Married	4788	25388	0	Y	Yes	11	3	4	80	0	4	2	3	3	2	0	9
45	No	Travel_Rarely	556	Research & Development	25	2	Life Sciences	1	1888	2	Female	93	2	2	Manufacturing Director	4	Married	5906	23888	0	Y	No	13	3	4	80	2	10	2	2	9	8	3	2
36	No	Travel_Frequently	1213	Human Resources	2	1	Human Resources	1	1890	2	Male	94	2	2	Human Resources	4	Single	3886	4223	1	Y	No	21	4	4	80	0	10	2	2	10	1	0	14
44	No	Travel_Rarely	170	Research & Development	1	4	Life Sciences	1	1903	2	Male	78	4	2	Healthcare Representative	1	Married	5033	9364	2	Y	No	15	3	4	80	1	10	5	3	2	0	2	8
56	Yes	Travel_Rarely	1162	Research & Development	24	2	Life Sciences	1	1907	1	Male	97	3	1	Laboratory Technician	4	Single	2587	10261	1	Y	No	16	3	4	80	0	5	3	3	4	2	1	10
31	No	Travel_Rarely	1079	Sales	10	2	Medical	1	1912	3	Female	86	3	2	Sales Executive	4	Divorced	6583	20115	2	Y	Yes	11	3	4	80	1	8	2	3	5	2	1	7
29	Yes	Travel_Frequently	746	Sales	24	3	Technical Degree	1	1928	3	Male	45	4	1	Sales Representative	1	Single	1091	10642	1	Y	No	17	3	4	80	0	1	3	3	1	0	0	11
28	Yes	Travel_Rarely	1475	Sales	13	2	Marketing	1	1933	4	Female	84	3	2	Sales Executive	3	Single	9854	23352	3	Y	Yes	11	3	4	80	0	6	0	3	2	0	2	4
39	No	Travel_Rarely	867	Research & Development	9	2	Medical	1	1936	1	Male	87	3	2	Manufacturing Director	1	Married	5151	12315	1	Y	No	25	4	4	80	1	10	3	3	10	0	7	2
38	No	Travel_Rarely	1206	Research & Development	9	2	Life Sciences	1	1940	2	Male	71	3	1	Research Scientist	4	Divorced	4771	14293	2	Y	No	19	3	4	80	2	10	0	4	5	2	0	7
49	No	Travel_Frequently	1064	Research & Development	2	1	Life Sciences	1	1941	2	Male	42	3	5	Research Director	4	Married	19161	13738	3	Y	No	15	3	4	80	0	28	3	3	5	4	4	9
35	No	Travel_Rarely	682	Sales	18	4	Medical	1	1945	2	Male	71	3	2	Sales Executive	1	Married	5561	15975	0	Y	No	16	3	4	80	1	6	2	1	5	3	0	1
31	No	Non-Travel	976	Research & Development	3	2	Medical	1	1948	3	Male	48	3	1	Research Scientist	1	Divorced	3065	3995	1	Y	Yes	13	3	4	80	1	4	3	4	4	2	2	0
26	No	Travel_Rarely	157	Research & Development	1	3	Medical	1	1952	3	Male	95	3	1	Laboratory Technician	1	Single	2867	20006	0	Y	No	13	3	4	80	0	8	6	2	7	7	7	1
35	No	Travel_Rarely	1224	Sales	7	4	Life Sciences	1	1962	3	Female	55	3	2	Sales Executive	4	Married	5204	13586	1	Y	Yes	11	3	4	80	0	10	2	3	10	8	0	2
42	No	Non-Travel	335	Research & Development	23	2	Life Sciences	1	1976	4	Male	37	2	2	Research Scientist	3	Single	4332	14811	1	Y	No	12	3	4	80	0	20	2	3	20	9	3	2
54	No	Travel_Rarely	157	Research & Development	10	3	Medical	1	1980	3	Female	77	3	2	Manufacturing Director	1	Single	4440	25198	6	Y	Yes	19	3	4	80	0	9	3	3	5	2	1	2
38	No	Travel_Frequently	508	Research & Development	6	4	Life Sciences	1	1997	1	Male	72	2	2	Manufacturing Director	3	Married	5321	14284	2	Y	No	11	3	4	80	1	10	1	3	8	3	7	1
22	No	Travel_Rarely	581	Research & Development	1	2	Life Sciences	1	2007	4	Male	63	3	1	Research Scientist	3	Single	3375	17624	0	Y	No	12	3	4	80	0	4	2	4	3	2	1	3
21	No	Travel_Rarely	501	Sales	5	1	Medical	1	2021	3	Male	58	3	1	Sales Representative	1	Single	2380	25479	1	Y	Yes	11	3	4	80	0	2	6	3	2	2	1	4
56	Yes	Travel_Rarely	310	Research & Development	7	2	Technical Degree	1	2032	4	Male	72	3	1	Laboratory Technician	3	Married	2339	3666	8	Y	No	11	3	4	80	1	14	4	1	10	9	9	0
34	No	Travel_Rarely	704	Sales	28	3	Marketing	1	2035	4	Female	95	2	2	Sales Executive	3	Married	6712	8978	1	Y	No	21	4	4	80	2	8	2	3	8	7	1	6
32	No	Travel_Rarely	529	Research & Development	2	3	Technical Degree	1	2038	4	Male	78	3	1	Research Scientist	1	Single	2439	11288	1	Y	No	14	3	4	80	0	4	4	3	4	2	1	7
50	Yes	Travel_Frequently	878	Sales	1	4	Life Sciences	1	2044	2	Male	94	3	2	Sales Executive	3	Divorced	6728	14255	7	Y	No	12	3	4	80	2	12	3	3	6	3	0	0
40	No	Travel_Rarely	1322	Research & Development	2	4	Life Sciences	1	2048	3	Male	52	2	1	Research Scientist	3	Single	2809	2725	2	Y	No	14	3	4	80	0	8	2	3	2	2	2	3
35	No	Travel_Frequently	1199	Research & Development	18	4	Life Sciences	1	2049	3	Male	80	3	2	Healthcare Representative	3	Married	5689	24594	1	Y	Yes	14	3	4	80	2	10	2	4	10	2	0	7
35	No	Travel_Rarely	287	Research & Development	1	4	Life Sciences	1	2052	3	Female	62	1	1	Research Scientist	4	Married	2977	8952	1	Y	No	12	3	4	80	1	4	5	3	4	3	1	3
26	No	Travel_Rarely	1167	Sales	5	3	Other	1	2060	4	Female	30	2	1	Sales Representative	3	Single	2966	21378	0	Y	No	18	3	4	80	0	5	2	3	4	2	0	8
49	No	Travel_Frequently	1023	Sales	2	3	Medical	1	2065	4	Male	63	2	2	Sales Executive	2	Married	5390	13243	2	Y	No	14	3	4	80	0	17	3	2	9	6	0	2

## Sheet: preprocessed
PercentSalaryHike
25
25
25
25
25
25
25
25
25
25
25
25
25
25
25
25
25
25
24
24
24
24
24
24
24
24
24
24
24
24
24
24
24
24
24
24
24
24
24
23
23
23
23
23
23
23
23
23
23
23
23
23
23
23
23
23
23
23
23
23
23
23
23
23
23
23
23
22
22
22
22
22
22
22
22
22
22
22
22
22
22
22
22
22
22
22
22
22
22
22
22
22
22
22
22
22
22
22
22
22
22
22
22
22
22
22
22
22
22
22
22
22
22
22
22
22
22
22
22
22
22
22
22
21
21
21
21
21
21
21
21
21
21
21
21
21
21
21
21
21
21
21
21
21
21
21
21
21
21
21
21
21
21
21
21
21
21
21
21
21
21
21
21
21
21
21
21
21
21
21
21
20
20
20
20
20
20
20
20
20
20
20
20
20
20
20
20
20
20
20
20
20
20
20
20
20
20
20
20
20
20
20
20
20
20
20
20
20
20
20
20
20
20
20
20
20
20
20
20
20
20
20
20
20
20
20
19
19
19
19
19
19
19
19
19
19
19
19
19
19
19
19
19
19
19
19
19
19
19
19
19
19
19
19
19
19
19
19
19
19
19
19
19
19
19
19
19
19
19
19
19
19
19
19
19
19
19
19
19
19
19
19
19
19
19
19
19
19
19
19
19
19
19
19
19
19
19
19
19
19
19
19
18
18
18
18
18
18
18
18
18
18
18
18
18
18
18
18
18
18
18
18
18
18
18
18
18
18
18
18
18
18
18
18
18
18
18
18
18
18
18
18
18
18
18
18
18
18
18
18
18
18
18
18
18
18
18
18
18
18
18
18
18
18
18
18
18
18
18
18
18
18
18
18
18
18
18
18
18
18
18
18
18
18
18
18
18
18
18
18
18
17
17
17
17
17
17
17
17
17
17
17
17
17
17
17
17
17
17
17
17
17
17
17
17
17
17
17
17
17
17
17
17
17
17
17
17
17
17
17
17
17
17
17
17
17
17
17
17
17
17
17
17
17
17
17
17
17
17
17
17
17
17
17
17
17
17
17
17
17
17
17
17
17
17
17
17
17
17
17
17
17
17
16
16
16
16
16
16
16
16
16
16
16
16
16
16
16
16
16
16
16
16
16
16
16
16
16
16
16
16
16
16
16
16
16
16
16
16
16
16
16
16
16
16
16
16
16
16
16
16
16
16
16
16
16
16
16
16
16
16
16
16
16
16
16
16
16
16
16
16
16
16
16
16
16
16
16
16
16
16
15
15
15
15
15
15
15
15
15
15
15
15
15
15
15
15
15
15
15
15
15
15
15
15
15
15
15
15
15
15
15
15
15
15
15
15
15
15
15
15
15
15
15
15
15
15
15
15
15
15
15
15
15
15
15
15
15
15
15
15
15
15
15
15
15
15
15
15
15
15
15
15
15
15
15
15
15
15
15
15
15
15
15
15
15
15
15
15
15
15
15
15
15
15
15
15
15
15
15
15
15
14
14
14
14
14
14
14
14
14
14
14
14
14
14
14
14
14
14
14
14
14
14
14
14
14
14
14
14
14
14
14
14
14
14
14
14
14
14
14
14
14
14
14
14
14
14
14
14
14
14
14
14
14
14
14
14
14
14
14
14
14
14
14
14
14
14
14
14
14
14
14
14
14
14
14
14
14
14
14
14
14
14
14
14
14
14
14
14
14
14
14
14
14
14
14
14
14
14
14
14
14
14
14
14
14
14
14
14
14
14
14
14
14
14
14
14
14
14
14
14
14
14
14
14
14
14
14
14
14
14
14
14
14
14
14
14
14
14
14
14
14
14
14
14
14
14
14
14
14
14
14
14
14
14
14
14
14
14
14
14
14
14
14
14
14
14
14
14
14
14
14
14
14
14
14
14
14
14
14
14
14
14
14
14
14
14
14
14
14
14
14
14
14
14
14
14
14
14
14
14
14
13
13
13
13
13
13
13
13
13
13
13
13
13
13
13
13
13
13
13
13
13
13
13
13
13
13
13
13
13
13
13
13
13
13
13
13
13
13
13
13
13
13
13
13
13
13
13
13
13
13
13
13
13
13
13
13
13
13
13
13
13
13
13
13
13
13
13
13
13
13
13
13
13
13
13
13
13
13
13
13
13
13
13
13
13
13
13
13
13
13
13
13
13
13
13
13
13
13
13
13
13
13
13
13
13
13
13
13
13
13
13
13
13
13
13
13
13
13
13
13
13
13
13
13
13
13
13
13
13
13
13
13
13
13
13
13
13
13
13
13
13
13
13
13
13
13
13
13
13
13
13
13
13
13
13
13
13
13
13
13
13
13
13
13
13
13
13
13
13
13
13
13
13
13
13
13
13
13
13
13
13
13
13
13
13
13
13
13
13
13
13
13
13
13
13
13
13
13
13
13
13
13
13
13
13
13
13
13
13
12
12
12
12
12
12
12
12
12
12
12
12
12
12
12
12
12
12
12
12
12
12
12
12
12
12
12
12
12
12
12
12
12
12
12
12
12
12
12
12
12
12
12
12
12
12
12
12
12
12
12
12
12
12
12
12
12
12
12
12
12
12
12
12
12
12
12
12
12
12
12
12
12
12
12
12
12
12
12
12
12
12
12
12
12
12
12
12
12
12
12
12
12
12
12
12
12
12
12
12
12
12
12
12
12
12
12
12
12
12
12
12
12
12
12
12
12
12
12
12
12
12
12
12
12
12
12
12
12
12
12
12
12
12
12
12
12
12
12
12
12
12
12
12
12
12
12
12
12
12
12
12
12
12
12
12
12
12
12
12
12
12
12
12
12
12
12
12
12
12
12
12
12
12
12
12
12
12
12
12
12
12
12
12
12
12
12
12
12
12
12
12
12
12
12
12
12
12
11
11
11
11
11
11
11
11
11
11
11
11
11
11
11
11
11
11
11
11
11
11
11
11
11
11
11
11
11
11
11
11
11
11
11
11
11
11
11
11
11
11
11
11
11
11
11
11
11
11
11
11
11
11
11
11
11
11
11
11
11
11
11
11
11
11
11
11
11
11
11
11
11
11
11
11
11
11
11
11
11
11
11
11
11
11
11
11
11
11
11
11
11
11
11
11
11
11
11
11
11
11
11
11
11
11
11
11
11
11
11
11
11
11
11
11
11
11
11
11
11
11
11
11
11
11
11
11
11
11
11
11
11
11
11
11
11
11
11
11
11
11
11
11
11
11
11
11
11
11
11
11
11
11
11
11
11
11
11
11
11
11
11
11
11
11
11
11
11
11
11
11
11
11
11
11
11
11
11
11
11
11
11
11
11
11
11
11
11
11
11
11
11
11
11
11
11
11
11
11
11
11
11
11
11
11
11
11
11
5

## Sheet: EMP2
Sampled_PercentSalaryHike
24
24
22
22
21
21
21
20
20
20
20
19
19
19
19
19
18
18
18
18
18
18
18
17
17
17
17
17
16
16
16
16
15
15
14
14
14
14
14
13
13
13
13
13
13
13
13
12
12
12
12
12
12
11
11
11
11
11
11
11
