# Supplementary material for: Unbiased machine learning-assisted approach for conditional discretization of human performances
Source: PeerJ Comput Sci. 2025 Apr 21;11:e2804. doi: 10.7717/peerj-cs.2804 (PMC12190627; doi:10.7717/peerj-cs.2804)
Supplement: Supplemental Information 3 [file peerj-cs-11-2804-s003.xlsx]

## Sheet: student_prediction
STUDENTID	AGE	GENDER	HS_TYPE	SCHOLARSHIP	WORK	ACTIVITY	PARTNER	SALARY	TRANSPORT	LIVING	MOTHER_EDU	FATHER_EDU	#_SIBLINGS	KIDS	MOTHER_JOB	FATHER_JOB	STUDY_HRS	READ_FREQ	READ_FREQ_SCI	ATTEND_DEPT	IMPACT	ATTEND	PREP_STUDY	PREP_EXAM	NOTES	LISTENS	LIKES_DISCUSS	CLASSROOM	CUML_GPA	EXP_GPA	COURSE ID	GRADE
STUDENT1	2	2	3	3	1	2	2	1	1	1	1	2	3	1	2	5	3	2	2	1	1	1	1	1	3	2	1	2	1	1	1	1
STUDENT2	2	2	3	3	1	2	2	1	1	1	2	3	2	1	2	1	2	2	2	1	1	1	1	1	3	2	3	2	2	3	1	1
STUDENT3	2	2	2	3	2	2	2	2	4	2	2	2	2	1	2	1	2	1	2	1	1	1	1	1	2	2	1	1	2	2	1	1
STUDENT4	1	1	1	3	1	2	1	2	1	2	1	2	5	1	2	1	3	1	2	1	1	1	1	2	3	2	2	1	3	2	1	1
STUDENT5	2	2	1	3	2	2	1	3	1	4	3	3	2	1	2	4	2	1	1	1	1	1	2	1	2	2	2	1	2	2	1	1
STUDENT6	2	2	2	3	2	2	2	2	1	1	3	3	2	1	2	3	1	1	2	1	1	1	1	1	1	2	1	2	4	4	1	2
STUDENT7	1	2	2	4	2	2	2	1	1	3	1	3	1	1	2	4	2	2	2	2	1	2	1	1	3	3	3	3	4	4	1	5
STUDENT8	1	1	2	3	1	1	1	2	2	3	4	3	1	1	4	3	1	2	2	1	1	1	3	1	3	2	2	1	1	1	1	2
STUDENT9	2	1	3	3	2	1	1	1	1	3	2	4	2	1	2	4	1	2	2	1	1	1	1	1	3	2	2	2	4	3	1	5
STUDENT10	2	1	2	3	2	2	1	3	4	2	1	2	3	1	2	3	2	2	2	1	1	2	1	1	2	2	2	2	1	2	1	0
STUDENT11	1	1	1	3	2	2	2	3	2	3	3	4	2	1	3	2	1	1	1	1	1	2	1	1	2	2	2	2	1	1	1	2
STUDENT12	1	1	1	4	1	1	2	4	2	3	5	5	1	1	3	2	3	3	3	1	3	1	3	2	3	1	3	3	4	3	1	0
STUDENT13	1	1	1	4	2	2	2	1	1	1	3	5	4	2	2	2	3	2	2	1	1	1	1	1	2	2	2	3	4	2	1	0
STUDENT14	2	1	2	5	2	2	2	1	1	1	2	2	2	1	2	3	1	2	1	1	1	2	1	1	3	2	3	3	4	2	1	1
STUDENT15	3	2	2	4	1	1	2	3	4	2	3	1	2	1	4	1	2	2	2	1	1	1	1	1	2	3	2	1	4	4	1	2
STUDENT16	2	2	2	3	2	2	2	1	1	2	4	4	2	1	3	1	2	2	2	2	3	2	1	1	3	2	2	3	2	2	1	2
STUDENT17	1	1	2	5	2	1	2	1	1	1	2	2	4	1	2	3	2	2	2	1	1	2	1	1	3	2	3	3	4	3	1	1
STUDENT18	2	2	2	3	2	2	2	1	1	1	2	2	2	1	2	1	2	2	2	2	1	2	1	1	2	2	2	2	2	2	1	2
STUDENT19	1	1	2	4	2	2	2	3	1	1	2	2	5	1	2	5	5	3	2	2	1	2	1	1	3	1	3	3	3	3	1	2
STUDENT20	1	2	1	3	2	2	1	2	2	2	3	3	3	1	2	4	4	2	2	1	2	1	1	1	3	2	2	3	2	3	1	3
STUDENT21	1	2	2	5	1	2	1	1	4	2	3	3	3	2	2	3	4	2	2	2	1	1	1	2	3	1	2	3	4	4	1	1
STUDENT22	1	2	2	5	2	2	1	1	4	2	2	2	4	1	2	3	3	2	2	1	1	1	1	1	3	1	3	3	3	3	1	1
STUDENT23	2	2	2	3	1	2	1	1	1	1	1	1	4	2	2	4	3	3	3	1	1	1	1	2	3	1	2	3	3	3	1	3
STUDENT24	3	2	2	2	1	1	2	5	1	1	1	4	3	1	2	1	3	2	3	1	1	2	1	1	3	2	3	3	3	3	1	1
STUDENT25	2	2	2	3	2	2	2	2	1	1	3	1	3	1	2	4	1	2	2	1	1	1	1	1	2	1	3	2	4	4	1	2
STUDENT26	2	2	2	3	2	2	1	1	1	2	1	4	3	1	2	4	2	2	2	1	1	1	1	1	2	1	3	2	1	2	1	3
STUDENT27	2	2	2	3	2	1	1	1	1	1	4	4	4	1	2	4	2	3	2	1	1	1	1	1	3	3	3	2	2	1	1	1
STUDENT28	1	2	1	3	1	2	2	1	1	1	1	1	4	1	2	3	3	2	2	1	1	2	1	1	3	1	2	1	2	1	1	1
STUDENT29	3	2	2	3	2	2	1	1	4	2	2	2	4	1	2	1	2	2	2	1	1	1	1	1	3	2	3	3	5	4	1	3
STUDENT30	2	2	3	4	2	2	2	1	4	2	3	3	2	1	4	1	2	2	2	1	1	1	1	1	3	2	2	2	4	3	1	5
STUDENT31	2	2	2	5	1	1	1	1	1	2	1	1	5	1	2	4	2	2	2	1	1	1	2	1	2	3	3	3	5	4	1	5
STUDENT32	3	2	2	3	1	2	2	1	1	2	1	2	4	1	2	3	2	2	3	1	1	1	1	1	3	3	2	3	4	3	1	3
STUDENT33	2	1	2	3	2	2	2	2	1	1	2	2	2	1	2	1	2	2	2	1	1	2	1	1	2	2	2	1	2	3	1	1
STUDENT34	2	1	2	3	1	2	1	1	1	1	1	2	5	1	2	3	2	1	2	1	1	1	1	1	1	3	2	2	2	3	1	2
STUDENT35	1	2	1	3	2	2	1	2	1	1	3	3	3	1	2	4	2	1	1	1	1	2	1	1	2	2	3	1	4	1	1	2
STUDENT36	1	2	1	4	2	2	2	3	1	1	1	2	5	1	2	3	2	2	2	1	1	2	1	1	2	1	3	1	1	1	1	1
STUDENT37	2	2	3	4	1	2	1	3	1	1	1	1	2	2	4	3	1	1	3	1	1	2	2	1	2	1	2	1	4	3	1	2
STUDENT38	2	2	2	3	1	1	1	2	2	3	3	3	1	1	2	3	2	2	2	1	1	1	1	1	3	2	3	3	5	4	1	1
STUDENT39	2	2	2	5	2	2	2	1	1	1	3	3	1	1	2	4	3	2	2	1	1	1	2	1	2	2	2	2	4	3	1	2
STUDENT40	2	1	2	3	2	2	1	1	1	2	1	3	1	1	2	4	1	2	1	1	1	1	1	1	2	2	2	3	2	1	1	1
STUDENT41	1	2	1	3	2	2	2	2	1	1	2	3	1	1	2	5	1	2	2	1	1	1	1	1	3	1	2	1	2	3	1	1
STUDENT42	3	2	2	3	1	2	2	2	1	2	1	4	2	1	2	2	3	2	2	1	1	2	1	1	3	2	2	3	4	3	1	1
STUDENT43	2	2	2	3	2	1	2	1	4	2	4	4	2	1	3	1	2	2	1	1	1	1	1	1	2	1	3	1	2	3	1	1
STUDENT44	1	2	2	3	2	2	1	1	1	1	2	3	3	1	2	1	2	2	2	1	1	2	1	1	3	1	3	3	3	2	1	4
STUDENT45	2	2	3	3	2	2	1	1	1	1	1	3	2	1	2	5	2	2	2	1	1	1	2	1	3	2	2	1	4	3	1	1
STUDENT46	1	2	2	3	2	2	1	4	1	1	2	3	5	1	2	4	3	2	2	1	1	1	1	1	2	2	2	1	4	3	1	3
STUDENT47	2	2	2	3	2	2	1	1	1	1	1	2	3	1	2	5	2	2	2	1	1	1	1	1	2	2	3	1	4	2	1	5
STUDENT48	2	2	2	3	2	2	1	1	1	2	4	3	1	1	5	4	2	2	2	1	1	2	1	1	2	1	3	2	5	3	1	3
STUDENT49	1	2	2	3	2	1	1	1	1	2	3	3	3	1	2	2	1	1	2	1	1	1	1	1	3	2	3	2	2	2	1	1
STUDENT50	1	2	1	4	2	2	2	2	4	1	2	3	2	1	2	4	2	2	2	1	1	1	2	1	2	2	2	1	3	2	1	2
STUDENT51	2	2	2	3	2	2	1	2	2	1	1	1	2	1	2	3	2	2	2	1	1	2	1	1	2	2	2	3	3	3	1	1
STUDENT52	2	1	3	3	1	1	2	1	1	1	1	2	5	1	2	1	1	2	2	1	1	2	1	1	2	3	3	1	3	3	1	4
STUDENT53	2	1	2	3	1	2	2	2	1	1	1	3	4	1	2	1	3	1	1	1	1	1	1	2	2	2	2	1	4	2	1	1
STUDENT54	2	1	2	3	2	1	2	2	1	1	1	1	5	1	2	1	1	2	2	1	1	2	1	1	2	2	2	2	3	2	1	5
STUDENT55	2	2	2	3	2	2	2	3	4	2	1	4	2	1	4	2	2	1	1	1	1	1	1	2	3	1	3	1	5	3	1	3
STUDENT56	3	2	2	3	1	2	1	4	1	2	1	1	5	3	2	1	1	2	2	1	1	1	3	3	1	3	3	3	5	4	1	3
STUDENT57	2	2	2	3	2	1	2	1	1	1	1	3	5	1	2	4	4	2	3	1	1	1	1	2	3	2	3	3	5	4	1	5
STUDENT58	2	2	2	3	1	1	2	1	1	1	4	2	3	1	3	3	2	3	2	1	1	1	1	1	3	2	3	1	5	4	1	4
STUDENT59	3	2	2	3	2	2	1	3	1	1	1	3	5	2	2	1	3	2	2	1	1	1	1	1	3	2	2	2	5	4	1	3
STUDENT60	2	2	2	3	2	1	1	1	1	1	4	4	3	1	2	3	3	2	2	1	1	1	1	1	3	3	2	2	4	3	1	5
STUDENT61	2	1	2	3	2	2	2	5	2	1	6	1	3	1	2	3	1	2	2	1	1	1	1	1	1	3	3	1	2	1	1	2
STUDENT62	1	2	3	3	2	1	2	2	1	2	1	3	4	1	2	3	3	1	2	1	3	2	1	1	3	2	2	2	4	4	1	5
STUDENT63	2	2	2	3	2	2	2	1	4	2	2	3	2	1	2	4	3	2	2	1	1	1	1	1	2	3	3	2	5	4	1	3
STUDENT64	2	2	2	4	2	2	1	2	1	1	1	3	3	1	2	1	1	1	2	1	1	1	3	1	2	2	2	1	3	3	1	5
STUDENT65	2	2	3	5	2	2	2	1	1	1	2	2	2	1	2	1	1	2	2	1	3	1	2	1	3	2	3	1	4	3	1	3
STUDENT66	1	2	2	3	2	2	1	3	1	1	2	4	3	1	2	4	1	1	2	1	3	2	2	1	2	1	2	1	2	2	1	2
STUDENT67	2	2	2	3	2	2	1	1	1	1	3	2	5	1	2	5	2	2	2	1	1	1	1	1	3	2	2	3	5	4	2	5
STUDENT68	2	2	3	3	1	1	2	3	1	2	3	4	4	2	2	2	2	2	2	1	1	2	1	1	2	2	1	2	2	3	2	1
STUDENT69	2	1	2	4	1	2	2	1	1	1	2	3	5	3	2	5	1	2	2	1	1	2	1	1	2	2	3	2	4	3	3	5
STUDENT70	2	1	2	4	2	2	1	1	1	1	2	2	2	1	2	3	1	1	2	1	1	1	2	1	3	2	3	1	3	2	3	5
STUDENT71	1	2	2	4	2	1	1	1	1	1	4	3	1	2	4	2	2	2	2	1	1	1	1	1	2	2	3	1	5	4	3	7
STUDENT72	1	1	3	4	2	2	2	1	1	3	1	3	5	1	2	4	2	2	1	1	1	1	1	1	2	3	3	3	2	2	3	6
STUDENT73	1	2	2	3	2	1	1	1	1	2	1	1	2	1	2	3	2	3	3	1	1	1	1	1	2	2	3	2	3	3	3	6
STUDENT74	2	2	2	4	2	2	2	1	1	2	1	3	4	1	2	4	3	1	1	2	1	1	1	2	3	2	3	1	5	3	3	6
STUDENT75	1	2	2	4	2	2	2	1	1	1	2	2	3	1	2	1	2	2	2	2	1	1	2	1	3	2	3	2	3	3	3	7
STUDENT76	1	2	2	4	2	1	2	1	1	3	1	5	4	1	2	2	3	3	1	1	1	1	1	1	2	2	2	2	4	1	3	7
STUDENT77	2	2	1	2	2	1	2	2	1	1	5	4	3	1	4	3	2	3	2	1	1	1	3	2	2	1	2	3	2	2	4	4
STUDENT78	1	2	1	2	2	2	1	2	2	2	6	5	2	1	4	2	2	2	2	2	1	2	3	1	2	2	2	2	1	1	4	7
STUDENT79	2	1	2	4	1	1	2	1	1	1	1	3	4	1	2	4	2	3	3	1	1	2	1	1	3	3	2	2	2	2	4	4
STUDENT80	2	2	2	4	2	2	2	1	1	1	1	3	4	1	2	4	1	2	2	1	3	1	1	1	3	3	3	2	4	4	4	3
STUDENT81	2	1	2	3	1	2	1	1	2	1	1	1	2	1	2	3	1	1	1	1	3	1	1	1	2	3	1	2	4	2	5	4
STUDENT82	3	2	2	3	1	2	2	1	1	2	1	2	4	1	2	3	2	2	2	1	1	1	1	1	3	3	2	3	5	4	5	3
STUDENT83	2	2	2	4	1	2	1	2	1	1	3	1	3	1	2	3	2	2	3	1	1	1	1	1	3	3	2	3	4	3	5	7
STUDENT84	2	2	3	3	2	2	2	3	1	1	4	4	2	1	1	2	1	2	2	1	1	1	3	1	3	2	3	3	1	2	5	7
STUDENT85	3	2	3	3	1	2	1	3	1	2	4	2	5	3	2	1	1	2	2	1	1	1	3	3	3	3	3	3	5	4	5	7
STUDENT86	1	2	2	5	2	2	2	2	1	1	1	1	5	1	2	1	1	1	1	1	1	1	1	1	3	2	3	3	4	3	5	4
STUDENT87	2	2	2	4	2	2	2	1	4	2	3	3	2	1	4	1	2	2	2	1	1	1	1	1	3	2	3	2	5	4	5	5
STUDENT88	2	2	2	3	2	1	2	2	1	1	3	4	2	1	1	1	2	2	2	1	1	1	2	1	2	2	2	2	1	1	6	6
STUDENT89	1	2	2	4	2	1	1	1	1	1	4	4	1	1	3	2	2	2	2	1	1	1	1	2	3	1	2	3	5	3	6	6
STUDENT90	2	2	2	3	2	2	2	1	1	1	3	5	3	1	2	2	2	2	2	1	1	2	1	1	3	1	3	3	3	2	6	6
STUDENT91	2	1	2	3	2	1	1	1	2	3	3	3	1	1	4	2	2	2	2	1	1	1	1	1	2	3	2	3	4	2	6	6
STUDENT92	2	2	2	5	1	1	1	1	1	2	4	1	5	1	2	3	2	2	2	1	1	1	1	1	2	3	3	2	5	4	6	6
STUDENT93	1	2	2	3	2	2	2	1	1	1	3	4	4	1	3	2	3	2	2	1	1	1	1	1	3	2	3	3	2	2	6	7
STUDENT94	1	2	2	1	1	2	1	1	1	2	1	2	4	1	2	3	5	2	1	1	1	1	1	1	3	3	3	2	2	2	6	4
STUDENT95	2	2	2	3	2	2	1	1	1	1	3	2	5	1	2	5	2	2	3	1	1	1	1	1	3	2	2	3	5	4	6	6
STUDENT96	1	2	3	5	1	1	1	1	2	3	3	4	1	1	2	1	2	2	3	1	1	1	1	1	3	2	2	1	4	3	7	5
STUDENT97	1	2	2	4	2	1	1	1	2	3	2	2	3	1	4	2	2	3	2	1	1	1	1	1	3	2	3	2	2	3	7	7
STUDENT98	1	2	2	4	1	2	2	1	1	3	3	3	4	1	2	3	2	2	2	1	1	1	1	1	3	2	2	1	3	3	7	6
STUDENT99	1	2	2	4	2	1	2	1	4	2	2	4	2	1	2	5	2	3	2	1	1	1	1	1	3	1	2	1	4	4	7	7
STUDENT100	2	2	2	3	2	2	2	1	4	2	3	4	2	1	2	1	3	2	2	1	1	1	1	1	3	2	3	2	2	2	7	7
STUDENT101	1	2	2	4	2	2	2	1	2	3	4	1	2	1	3	3	2	2	2	1	1	1	1	1	2	2	2	1	3	3	7	6
STUDENT102	1	2	2	4	2	2	1	2	1	3	2	3	1	1	2	4	2	2	2	1	1	1	1	1	3	3	2	1	2	3	7	7
STUDENT103	1	2	2	3	2	2	1	1	1	2	3	1	1	2	4	4	2	2	2	2	1	1	1	1	3	1	2	1	3	4	7	7
STUDENT104	1	2	1	4	2	2	1	5	1	2	1	3	4	1	2	1	2	3	2	1	1	1	1	1	2	2	3	2	4	4	7	7
STUDENT105	1	1	2	3	2	2	2	1	2	2	4	4	1	1	3	2	2	2	2	1	1	1	1	1	2	3	2	2	1	1	7	3
STUDENT106	1	2	2	4	1	1	2	1	1	1	2	2	4	1	2	4	2	3	2	1	1	2	1	2	2	1	3	1	3	3	7	7
STUDENT107	1	2	2	4	2	1	2	1	1	2	2	2	1	1	2	1	3	2	2	1	1	1	3	2	2	2	2	1	4	4	7	7
STUDENT108	1	1	2	4	1	1	2	1	1	3	1	3	5	1	2	4	2	2	2	1	1	1	2	1	2	3	2	1	4	2	7	6
STUDENT109	2	1	1	5	2	1	2	2	2	1	1	2	1	3	1	5	3	3	2	1	1	2	1	1	2	3	1	2	3	3	7	6
STUDENT110	1	2	1	3	2	1	1	1	2	2	4	4	2	3	2	5	3	2	2	1	1	1	2	2	3	2	3	1	4	4	7	7
STUDENT111	2	2	2	3	2	2	2	2	4	2	4	4	2	2	1	5	2	2	2	1	1	2	1	1	2	2	2	1	2	3	8	2
STUDENT112	1	1	1	5	2	1	2	1	1	2	3	3	1	1	3	2	1	2	2	2	2	1	1	1	3	1	3	3	4	3	8	2
STUDENT113	2	1	3	3	1	2	2	1	3	3	1	1	2	1	2	1	1	1	1	2	3	1	2	1	3	3	3	1	4	2	8	2
STUDENT114	2	1	3	3	2	2	2	1	4	2	4	4	1	1	3	2	2	2	3	2	3	2	2	1	2	2	1	1	1	2	8	1
STUDENT115	2	1	2	5	1	1	2	4	1	1	1	1	1	1	2	1	2	2	2	2	2	1	1	1	2	2	1	2	1	1	8	2
STUDENT116	2	1	2	5	1	2	1	1	1	1	1	1	2	1	2	2	3	3	2	2	3	1	2	2	3	2	3	2	2	2	8	1
STUDENT117	2	1	2	5	2	2	2	1	1	1	1	1	5	1	2	4	3	3	3	2	1	1	1	1	3	3	3	1	2	3	8	1
STUDENT118	3	1	1	3	2	1	2	1	1	2	4	4	1	1	1	3	2	2	3	2	1	2	1	1	2	3	2	1	2	3	8	1
STUDENT119	1	2	2	5	2	1	1	1	4	2	1	2	3	1	4	4	1	2	2	1	1	1	3	1	3	3	2	2	3	3	8	1
STUDENT120	2	1	2	4	2	1	2	1	1	2	3	3	2	3	2	5	5	2	2	1	1	1	1	2	2	2	3	1	3	3	8	2
STUDENT121	2	1	1	3	1	1	1	2	2	3	3	3	2	1	3	4	1	1	1	1	1	2	2	1	3	3	3	2	2	2	8	1
STUDENT122	2	1	2	3	1	1	1	1	2	1	1	1	5	3	2	4	5	3	3	1	3	1	2	1	1	1	1	1	1	1	8	0
STUDENT123	1	2	2	5	2	1	2	1	1	1	3	3	2	1	2	1	2	1	2	1	2	1	2	1	3	2	2	1	4	3	8	2
STUDENT124	2	1	3	3	2	2	2	3	1	1	3	2	4	1	1	1	2	2	3	2	1	1	1	1	3	3	2	1	1	1	8	1
STUDENT125	1	1	2	4	1	1	1	1	1	3	2	3	2	1	4	3	4	2	2	2	1	1	2	2	3	3	2	1	3	3	9	3
STUDENT126	1	1	2	5	1	1	2	1	1	3	1	1	5	1	2	3	3	2	3	2	1	1	1	2	3	2	3	1	1	3	9	2
STUDENT127	1	1	1	4	1	1	1	3	2	3	4	6	2	1	4	3	4	2	3	1	1	1	2	1	3	3	3	1	2	2	9	3
STUDENT128	1	1	2	4	2	2	2	1	4	3	3	2	2	1	3	4	2	1	1	2	1	1	1	1	3	2	2	1	2	2	9	1
STUDENT129	1	1	2	4	2	1	1	1	4	3	3	4	2	1	4	2	2	1	1	2	1	1	1	1	3	2	2	1	2	2	9	0
STUDENT130	1	1	2	3	1	1	2	1	1	1	1	1	3	1	2	4	4	2	3	2	1	1	2	2	3	2	3	2	2	3	9	3
STUDENT131	1	1	2	3	1	1	2	1	1	1	1	2	3	1	2	4	4	2	2	2	1	1	1	2	3	1	3	2	2	3	9	1
STUDENT132	1	1	1	5	2	1	2	1	2	2	4	3	1	1	3	2	4	1	3	2	1	1	1	2	3	2	3	1	5	3	9	4
STUDENT133	1	1	1	5	2	1	2	1	1	2	1	2	3	1	2	1	2	2	3	2	1	1	2	1	3	2	3	1	5	4	9	3
STUDENT134	1	1	2	5	2	2	1	1	1	1	1	1	1	1	2	3	3	1	2	2	1	1	1	1	3	3	3	2	5	3	9	3
STUDENT135	1	1	2	4	2	1	2	1	2	3	1	1	2	1	4	3	2	2	2	2	1	1	1	1	2	1	2	1	2	3	9	1
STUDENT136	2	1	2	3	1	1	2	1	4	2	3	3	1	1	2	1	2	3	2	1	3	1	1	1	3	3	2	1	3	2	9	2
STUDENT137	1	1	2	3	1	1	1	1	2	3	3	3	3	1	3	4	2	2	2	2	1	1	3	1	3	2	2	1	2	2	9	0
STUDENT138	1	1	1	5	2	1	2	1	1	1	2	2	2	1	2	1	2	2	2	1	1	1	1	1	3	1	3	1	2	4	9	2
STUDENT139	1	1	2	4	1	1	1	5	2	3	3	1	1	2	4	5	2	2	3	2	3	1	2	1	3	2	3	1	1	3	9	0
STUDENT140	1	1	2	4	1	2	1	2	2	3	3	3	1	1	5	4	1	1	2	2	1	2	2	1	2	3	2	1	1	2	9	0
STUDENT141	2	1	2	3	1	1	2	1	1	2	1	2	2	2	2	4	3	3	2	1	1	1	1	1	2	1	2	1	3	3	9	5
STUDENT142	1	1	2	4	2	2	2	1	4	2	1	1	5	1	2	1	3	2	2	2	1	2	1	1	3	2	2	1	5	3	9	5
STUDENT143	1	1	1	4	2	2	2	1	1	1	3	4	4	1	2	4	2	2	2	1	1	1	1	1	3	3	2	1	4	3	9	1
STUDENT144	2	1	2	4	1	1	1	5	2	3	4	4	1	1	3	3	2	2	1	1	1	1	2	1	2	1	2	1	5	3	9	4
STUDENT145	1	1	1	5	2	2	2	3	1	1	3	1	5	1	2	4	3	1	1	1	1	1	2	1	3	2	3	1	5	4	9	3

## Sheet: preprocessed
CUML_GPA
5
5		Legend
5		Cumulative grade point average in the last semester (/4.00): (1: <2.00, 2: 2.00-2.49, 3: 2.50-2.99, 4: 3.00-3.49, 5: above 3.49)
5
5		These CUML_GPA labels are sampled into 50 records then converted into the real numbers between 0.00 to 4.00 by applying RAND(). The results lie in worksheet STD1.
5
5
5
5
5
5
5
5
5
5
5
5
5
5
5
5
5
5
5
5
4
4
4
4
4
4
4
4
4
4
4
4
4
4
4
4
4
4
4
4
4
4
4
4
4
4
4
4
4
4
4
4
4
4
4
4
4
4
4
4
3
3
3
3
3
3
3
3
3
3
3
3
3
3
3
3
3
3
3
3
3
3
3
3
3
2
2
2
2
2
2
2
2
2
2
2
2
2
2
2
2
2
2
2
2
2
2
2
2
2
2
2
2
2
2
2
2
2
2
2
2
2
2
1
1
1
1
1
1
1
1
1
1
1
1
1
1
1
1
1

## Sheet: STD1
Sampled_CGPA
3.46
3.46
3.45
3.42
3.42
3.36
3.32
3.29
3.28
3.26
3.24
3.23
3.22
3.21
3.15
3.15
3.15
3.12
3.04
2.88
2.88
2.86
2.81
2.8
2.74
2.6
2.5
2.36
2.34
2.29
2.24
2.23
2.15
2.13
2.11
2.07
2.04
2.04
2.04
2
2
1.78
1.71
1.55
1.33
1.27
0.93
0.37
0.31
0.18
