# Supplementary material for: Unbiased machine learning-assisted approach for conditional discretization of human performances
Source: PeerJ Comput Sci. 2025 Apr 21;11:e2804. doi: 10.7717/peerj-cs.2804 (PMC12190627; doi:10.7717/peerj-cs.2804)
Supplement: Supplemental Information 4 [file peerj-cs-11-2804-s004.xlsx]

## Sheet: Sheet1
math score
90
90
90
90
80
80
79
78
75
70
70
70
70
70
70
57
56
55
54
53
52
51
50
43
41
40
39
38
38
37
27
27
27
26
26
26
25
24
24
23
